# Supplementary material
Source: PubMed Central journal article supplement (PMC6873225)
Supplement: NIHMS1542262-supplement-1.pdf [file NIHMS1542262-supplement-1.pdf]

1 **Supporting Material**

2

3 **Use of Molecular Probe Technology to Monitor Key and Low Abundance**

4 **Community Members in Activated Sludge**

5

6 Weihong Xu<sup>a,b,\*</sup>, Veronica R. Brand<sup>c,\*</sup>, Sundari Suresh<sup>a</sup>, Michael A. Jensen<sup>a</sup>,

7 Ronald W. Davis<sup>a,d,e</sup>, Craig S. Criddle<sup>c</sup>, Robert P. St. Onge<sup>a,d</sup>, and Richard W.

8 Hyman<sup>a,d,#</sup> ORCID 0000-0002-8460-309X

9

10 <sup>a</sup>Stanford Genome Technology Center, Palo Alto, CA 94304, USA

11 <sup>b</sup>Precision Medicine Institute, The First Affiliated Hospital of Sun Yat-sen

12 University, Guangzhou, China

13 <sup>c</sup>Department of Civil and Environmental Engineering, Stanford University,

14 Stanford CA 94305, USA

15 <sup>d</sup>Department of Biochemistry, Stanford University Medical College, Stanford, CA

16 94305, USA

17 <sup>e</sup>Department of Genetics, Stanford University Medical College, Stanford, CA

18 94305, USA

19 \*These authors contributed equally to this investigation.

20 #Address correspondence to [rhyman@stanford.edu](mailto:rhyman@stanford.edu).

21 Number of Supplementary Figures: 2.

22 Number of Supplementary Tables: 3.

23

24 **Supplementary Figures**

25

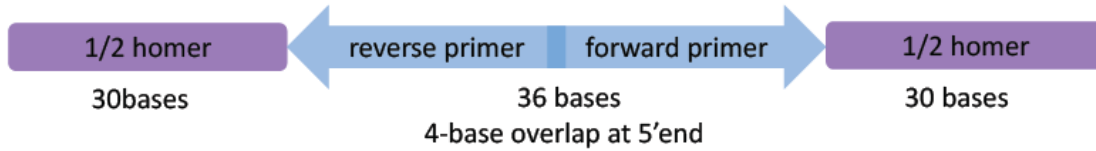

26

27 **Figure S1.** Molecular probe diagram. A diagram of a molecular probe is  
28 presented. A molecular probe is a 96 base oligonucleotide that consists of two  
29 parts. One part is the Homer (a 60 base sequence unique to the bacterial  
30 genome of interest) divided into two 30-base end sequences (purple). The  
31 second part is a 36-base internal universal amplification sequence (blue).

32

33

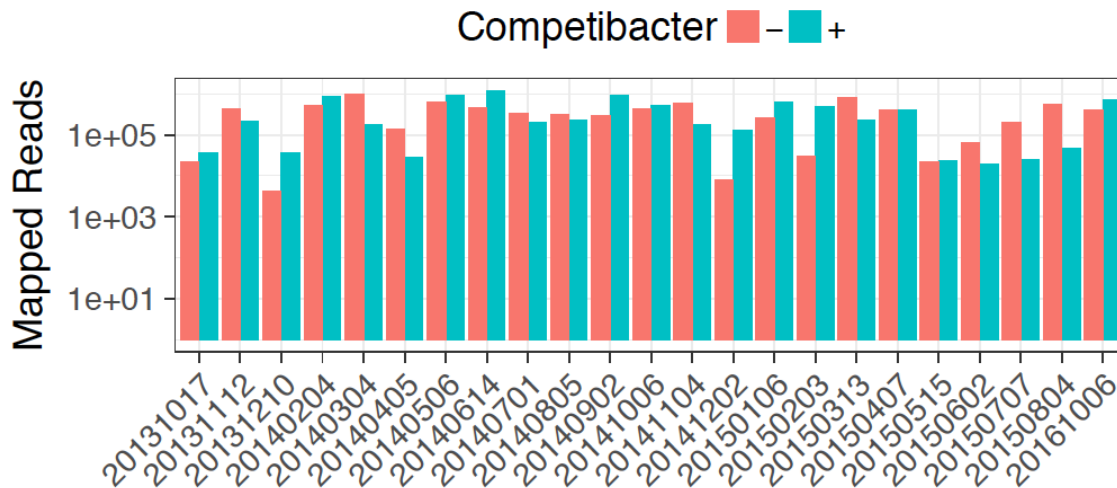

34

35 **Figure S2.** Number of sequence reads per time point. On a log scale, the  
36 number of sequence reads per time point for each of the two probe ensembles is  
37 presented.

38

39

40 **Supplementary Tables**

41

42 **Table S1.** Molecular probe base sequences. The final probe ensemble contained

43 3,316 molecular probes representing 353 bacterial genomes plus 10 toxin genes.

44 The base sequence of each probe is presented. To every design, 5'-

45 TAGACGTAAGCCTGGTCTCA is added to the 5' end and

46 AGGTAGACTCGATTCCCGAT-3' is added to the 3' end. Therefore, with

47 appropriate primers, all of the oligonucleotides can be amplified together such

48 that the group need be ordered only once. Appropriate restriction enzyme

49 cleavage removes these end sequences cleanly.

| Bacteria/Toxin Genes        | ID               | Sequence (X =                                                                                         |
|-----------------------------|------------------|-------------------------------------------------------------------------------------------------------|
| Achromobacter xylosoxidans  | NC_014640_11844  | AGAGTGTACCGACCTCAGTAGCCGTGACTATCGACA)<br>ctaaggcttcgggaatggaatcgctttatXcgcgggtggagatcaattcgaatgctagtg |
| Achromobacter xylosoxidans  | NC_014640_119598 | gatagaagctacaactatcgaagtgtatcgXttgctcatggcggaatcctcgaagacg                                            |
| Achromobacter xylosoxidans  | NC_014640_122025 | ggtaataaaccactcgcacagaggtaaacXgtcaaggcgttcgcgcaagctgttcc                                              |
| Achromobacter xylosoxidans  | NC_014640_13569  | cgtcgaaatcaggatgtgctcgttcaagtXcagttcccgaattcatgctgttccag                                              |
| Achromobacter xylosoxidans  | NC_014640_142734 | ctagcacttggttgcccaggcttactXgtacgaggatttctcataccgcttggg                                                |
| Achromobacter xylosoxidans  | NC_014640_14755  | gttcgggaccagctggcaagagcgcgaggXataataggaagcattctcgaatgtaaacg                                           |
| Achromobacter xylosoxidans  | NC_014640_160475 | ccgttgcgtaattccctcagttcctgggtXctgtaccgcaattgcaggatttctcctg                                            |
| Achromobacter xylosoxidans  | NC_014640_162714 | cgcggtcaagaatgtttatcagggcaacaXgacgaagtagcagcagcgtttagctcg                                             |
| Achromobacter xylosoxidans  | NC_014640_196357 | cgctatgaaacgcgaacaccacggaactgaXacatcagctgtctcagatcgtatagc                                             |
| Achromobacter xylosoxidans  | NC_014640_208136 | cgggtcgtaaaggcaccttcatggtgacgacXaatctgctgatcaaggtgaagtctcgtg                                          |
| Achromobacter xylosoxidans  | NC_014640_216918 | gattcccgtcgcgaatgatattgggctcgXggcgaagaactgtattggaatccgacgag                                           |
| Achromobacter xylosoxidans  | NC_014640_219942 | gacgaagtatctggcgattggagcttagtaXgcaggtgcgatgacaattgattgctgg                                            |
| Achromobacter xylosoxidans  | NC_014640_2472   | ggtatcagtgatgtgatttctgcccgttgggXtcatgcccgttctccgattctgctgacg                                          |
| Achromobacter xylosoxidans  | NC_014640_36921  | ccatgaacgcacccctggaacgtctcgcgaXttaacatgatgaattgagttggtggcg                                            |
| Achromobacter xylosoxidans  | NC_014640_59615  | gaagggacacgtttccgcccagctcctgtaXctcaaggcgtgaaatcgttatgtgtaag                                           |
| Achromobacter xylosoxidans  | NC_014640_61585  | ggtactggataggcgccaagaagatctcgXaacttgcgataattcctaccctgggtgtg                                           |
| Achromobacter xylosoxidans  | NC_014640_79526  | caattgattacgtggcatcgctcgattatXcgtttcagccattgccgaatccaatac                                             |
| Achromobacter xylosoxidans  | NC_014640_83540  | ccattctgttctggcgggcaacgtcattgXccatcatgtctactctgttccgttctcg                                            |
| Achromobacter xylosoxidans  | NC_014640_97441  | gcctttacagtaccggagctgtccacgtcgXtgcacatacattacattccggctcgattg                                          |
| Acidothermus cellulolyticus | NC_008578_12373  | cgctcggaatcgcaaagggtattacgccXcagcatttgtatgaatcgcatgattccgc                                            |
| Acidothermus cellulolyticus | NC_008578_21580  | catgtctcgttccgagatacacgtccctXcgtgtgataccaccacgacagcgtatag                                             |
| Acidothermus cellulolyticus | NC_008578_23820  | cgctctgcatatttccgtcgtgatcggaXatactccattgtgatacgtctcctctc                                              |
| Acidothermus cellulolyticus | NC_008578_30375  | cttcggcaacctctatacagtaattcgtgaXaattgcgattaagtcgcgcggtgattctg                                          |

|                             |                  |                                                               |
|-----------------------------|------------------|---------------------------------------------------------------|
| Acidothermus cellulolyticus | NC_008578_36707  | gcgcgctgacgaccgtgattgctgattctXttctcagcatctgaacagaggattatcg    |
| Acidothermus cellulolyticus | NC_008578_3771   | gccacgatgagcacgcgcaattggcgagcXgctaatacgtatgtaagtaaatgtgacg    |
| Acidothermus cellulolyticus | NC_008578_56419  | ccagtttcaggtagatctgttgatcagXtgacgaccagatcggtagctggcgcttac     |
| Acidothermus cellulolyticus | NC_008578_61599  | gttagctccgtaacatctccgaccatgtXaagccacgttgcgcaaacaggaagtgtcc    |
| Acidothermus cellulolyticus | NC_008578_68628  | cgcaaggggtccgtgctggtgaacgtctXacctgacaattacgtctgtatgtgtgg      |
| Acidothermus cellulolyticus | NC_008578_79523  | gtatgcatcggtatatactccgtagaactXggctatctccgacctgcacacgctacg     |
| Acidovorax avenae           | NC_015138_101742 | gccattccctccgtttgacgggacaaaggXatccaatttcagccaatccatgtatgtcc   |
| Acidovorax avenae           | NC_015138_105768 | gaggggtccttatctcggcaccctcgacaXataatcaattcctgcggatcaatcgctag   |
| Acidovorax avenae           | NC_015138_129971 | gacgaatacggaaattctctgggattggccXactggttacgttfaatagcgcgatggc    |
| Acidovorax avenae           | NC_015138_147070 | cttctgtaatccagcatgctcctcaactcXatctccttaaccacggattctcttttc     |
| Acidovorax avenae           | NC_015138_23394  | gagcatcgtcgaatcatggcgtccatagXgggcagtaggaatcgattcactactac      |
| Acidovorax avenae           | NC_015138_35566  | cggaattgtaacaggtgcaacgcgcggctXgtagttatattgcaactaactggcgtg     |
| Acidovorax avenae           | NC_015138_4283   | catgtgcaaaactaacggcggaggtagccgXggctgaagtgtatgttgatggattagg    |
| Acidovorax avenae           | NC_015138_60721  | gttcatcgcaatgttctgaaccatcgcacXatcatctccgtgctatagactcactcac    |
| Acidovorax avenae           | NC_015138_77001  | gaaggaatctcaattctcatcatcgggctXggcgataggaagactgctgccagtagccag  |
| Acidovorax avenae           | NC_015138_9389   | cactctgctgagtgcaaaagctgcagttgcXtctctatagctctaaacgcatctcttag   |
| Acidovorax sp               | NC_008782_101341 | gtcgtgtctcctgttgaaagtgtgcgaaXgtttgcgtgtgatcgcgtggtcatatgg     |
| Acidovorax sp               | NC_008782_146159 | catcgctattacagttgttcacaacaattXtgagaatagcgcgtgctggcagcgcgtcg   |
| Acidovorax sp               | NC_008782_22403  | ccattcttcatcggagcagatttatgtgXaattctgtaaagccgcctagcatctcgc     |
| Acidovorax sp               | NC_008782_41536  | ggctgtaaaggcgatttgatttctcagtXtcggagctgtcctgggtgatggcaactg     |
| Acidovorax sp               | NC_008782_52410  | gcagtcaggaaacagtgctgctcaagattaXcgacctcctgtggatcgagactcctgttc  |
| Acidovorax sp               | NC_008782_62487  | cctctactcgtgggcccataaagaaggttXcttactctgtgccgaagactggactaag    |
| Acidovorax sp               | NC_008782_67143  | gtttcgagaaccttctgtgttccctagtXtgatgctgctcagggtattccctgtgtc     |
| Acinetobacter baumannii     | NC_009085_102175 | gtttaactgatgcatgggatgatctccaaXttcttaagctcgtgtagcccgtgctctg    |
| Acinetobacter baumannii     | NC_009085_114037 | gcaaggctagtcgactaaagaccaaagagaXgcgctaaagtcgtaaaccgattgcataacc |
| Acinetobacter baumannii     | NC_009085_120607 | gagtaactctctcgcctgcccatgtgtXacgaaccacgttagctcctgcgattaaagc    |
| Acinetobacter baumannii     | NC_009085_121757 | gccatttgcggagaaattcttaaacctacXagccaccaagattgtccacttcgctgtc    |
| Acinetobacter baumannii     | NC_009085_23959  | cgaatggatggatgaccgggtgtgtaattXgtacgcaattcggatggtgtcgttattg    |
| Acinetobacter baumannii     | NC_009085_24034  | gtgcagcaagttaggcaccggtgattactXagattggccaaftcagaccggatgcaag    |
| Acinetobacter baumannii     | NC_009085_40492  | gcttggttgacctgagccatgctcactaaXggcagagttcacaattgccagattgtctg   |
| Acinetobacter baumannii     | NC_009085_45280  | cgatttcgacacaagcagctccatccctXgtccaacaacactcaagggtgattaaacc    |
| Acinetobacter baumannii     | NC_009085_60035  | gagaggttctctgatcttccagcatgacXaagtcgcatcattgagaaccattacattcg   |
| Acinetobacter baumannii     | NC_009085_96731  | ggcatacgcatatgttccgacagtaagccXcttatcgactgtaggtagagcttctgtctg  |
| Acinetobacter baumannii     | NC_009085_98965  | cacgcgtatgtactccatcaatgaatacXaccatccgagctccacttgcattatgatg    |
| Acinetobacter calcoaceticus | NC_016603_101642 | caggaataactgattgagatggttagtggXtgctttagtagcgcgcaatccaccaag     |
| Acinetobacter calcoaceticus | NC_016603_107676 | cgaaactgacgaccatagtcagcgtgttXggacgcattaaagtcgttctgtttacc      |
| Acinetobacter calcoaceticus | NC_016603_112389 | ccggacgttcagatccttctgactgcaXcagctgtgtattcaggttgcacacagac      |
| Acinetobacter calcoaceticus | NC_016603_117129 | gggtcagacctgttcacagttaagcgaXgattcagatagatcgttaccgaagcgtg      |
| Acinetobacter calcoaceticus | NC_016603_21343  | caatctacaacctgctgatattcaactcaXctgccgcggcaggttttagacacagcc     |
| Acinetobacter calcoaceticus | NC_016603_40829  | cttatagcgtacaacagtgcaaacctctXcgcctcattggcacagcagggtattcgg     |

|                             |                  |                                                               |
|-----------------------------|------------------|---------------------------------------------------------------|
| Acinetobacter calcoaceticus | NC_016603_52315  | gtttagctctattgtaagcgcgaccgagcXaacctcaaacacgcgcggtattgaacgtc   |
| Acinetobacter calcoaceticus | NC_016603_78101  | cggagttgtgaattaattccaaggaaagXagcgggcatcctgtaggtagaactccgac    |
| Acinetobacter oleivorans    | NC_014259_106309 | cggatccgtaaatagtgccgagcatttcatXcगतacccgttacaagttgccgctcgtg    |
| Acinetobacter oleivorans    | NC_014259_112274 | cagtagctgaagatagttggcattggatXagatcagccctcaatattggcgcctcggc    |
| Acinetobacter oleivorans    | NC_014259_121107 | ctagatactgcaactcgcggaactgagtXgctgggtattgatcaagcttgcattggc     |
| Acinetobacter oleivorans    | NC_014259_125797 | ctacactagctgctttccaccaatggattXaaccaagcatagccaacctaaagcacaaggc |
| Acinetobacter oleivorans    | NC_014259_15515  | cgggtgtaagcaatctgagtattcactacaXcaaagcactgtgcaacatgctcaggcacg  |
| Acinetobacter oleivorans    | NC_014259_30740  | cctgaccctataacgggtgaatatctcactXcccगतacggttatcgatgcagttaatctg  |
| Acinetobacter oleivorans    | NC_014259_6943   | cगतatgcgcgatcagcggggagggatggcXtaattactttacgctcattatagtctaac   |
| Acinetobacter oleivorans    | NC_014259_93583  | gttcgggccagagcgcgaataataagctgXcगतcattaaacataatgattcctgacac    |
| Acinetobacter oleivorans    | NC_014259_99177  | ctgttcacggctggagtggctcacggcgttgXgtaagttggcaataaattcccattatg   |
| Acinetobacter sp.           | NC_005966_102844 | caaacggattagcttactgttcaggatcatXagacaaggttgcगतacgccagctactcc   |
| Acinetobacter sp.           | NC_005966_107859 | ctccatccacagcaaatcgcgatcgcgagagXccgactctacgcgatcgggtcaaatgcc  |
| Acinetobacter sp.           | NC_005966_11581  | gtccatgaactggcgtaagttgaagtgcXttccatcgtgctcagggatcaaatcctcggc  |
| Acinetobacter sp.           | NC_005966_17209  | gtagcgcgcttgaggattgttctcaggcaXtctgccaacatcatgagagtgcctctgtc   |
| Acinetobacter sp.           | NC_005966_24659  | ccaagtgccactgaatacgtctaatgctcXcगतaccaccacgcacatgatcacctgtg    |
| Acinetobacter sp.           | NC_005966_254    | cagttagagatgacagggttcgctcaacXcgcggctctttgctgggtctttgtc        |
| Acinetobacter sp.           | NC_005966_31311  | cactgtaagtgtcggcaagcaggaactXactcaatacaaacggtaatgtgactggg      |
| Acinetobacter sp.           | NC_005966_38312  | gtacatccgatctatgtccaattgcaatcXgaagacgcagggttgctcagcattacacag  |
| Acinetobacter sp.           | NC_005966_46333  | gccattggaccgaggtcgtgttgagcagXgcaacaatgcgattgccattaccaatgc     |
| Acinetobacter sp.           | NC_005966_57884  | gggaaggcgaacttacgttactgctgtgXagagactatggataccgatcgaaggcgtc    |
| Acinetobacter sp.           | NC_005966_70360  | caattcctgatcgataagctattaagcccXcगतattgttgctgcacctgtgtcac       |
| Acinetobacter sp.           | NC_005966_83862  | gtgcaagctctatcgataatgcacgcgaacXatgcaggtggattaggtgcactcggctgg  |
| Acinetobacter sp.           | NC_005966_92394  | ccaatcctgatcagcगतatgcgatcgaaccaXctcctctgtaaacgatccactccatg    |
| Aeromonas salmonicida       | NC_009348_116436 | gaaattgaggctcgggagtgattgtatcXgcttcatgaattagctggcctccggatag    |
| Aeromonas salmonicida       | NC_009348_132038 | caggaagggtgcattactcgcctcaagaaaXcttcgcttcagcgaaggcatgctgcgtc   |
| Aeromonas salmonicida       | NC_009348_375    | gtaagcgaagagagttgtaactcgtgcccXagaagtgggcaattgccgttctcaaatg    |
| Aeromonas salmonicida       | NC_009348_44478  | cgctgctcatgttccattcatcattgggaXtccccttataaacggcgacctcatgag     |
| Aeromonas salmonicida       | NC_009348_84802  | gcatacctacaactcgtcgtcgcctgaaXcttcgagcagttgatgtccaactgctactg   |
| Aeromonas salmonicida       | NC_009348_91628  | cgtgggaatgcttagcctagtcacgcggXaatgggtaactcacctcttcgaggcaaaag   |
| Aeromonas veronii           | NC_015424_102598 | cacagtgaatgatccatgctgcccgaaggXatcttagctcgtcagggcaatccctaac    |
| Aeromonas veronii           | NC_015424_124748 | caattgtgtaacgatggaggcattaagXccggtcacgaatagggaacgatttgcag      |
| Aeromonas veronii           | NC_015424_29020  | gtttcttactactgatcagcctgttatgXaagcggttgatgacaacgcगतagactgg     |
| Aeromonas veronii           | NC_015424_34737  | cttcctcatattgaggtagaccggaaXgtctcgtgggtgtttatcgtgtcgttg        |
| Aeromonas veronii           | NC_015424_42843  | ccgttgcatggtgtggcactcataacceXgaactatcaacagaccatgatgtcccacgc   |
| Aeromonas veronii           | NC_015424_48933  | gtaagctcagcgggtgagctatcagattgXttatagcttgcggactgggagagtaacg    |
| Aeromonas veronii           | NC_015424_65932  | ctcagggaatccagacaaaagcgcgaaXaattgaccatctaacgtgccgactgttg      |
| Aeromonas veronii           | NC_015424_74666  | ctttactcgtaactcattatgccacagaXcgtcacaagctccatgaatgcccgtactcg   |
| Aeromonas veronii           | NC_015424_78683  | cagcaatcctcccgcataggtgccaatXctcgtcgcgccaatatgcaacattcc        |
| Aeromonas veronii           | NC_015424_84404  | gcgccaatccttgcctcgcगतgaagXagaggtgatcaataaccgatctcgttacc       |

|                                        |                  |                                                               |
|----------------------------------------|------------------|---------------------------------------------------------------|
| <i>Aeromonas veronii</i>               | NC_015424_90118  | ctggccatcagttacctgatagttcaccggXggagataacgagtggtgaagtactgtatc  |
| <i>Aeromonas veronii</i>               | NC_015424_94816  | ggttggattgttcgaaatggcatgcttatXgataactaatggaagtggcatccgcgacg   |
| <i>Akkermansia muciniphila</i>         | NC_010655_10441  | gtatcataagaatgatggcatatctcccXttctttgcggttgcacggcctgttccacc    |
| <i>Akkermansia muciniphila</i>         | NC_010655_14428  | caattgccgatcaattgccggattagtcXatctgttcatacacctggagcatagtgctg   |
| <i>Akkermansia muciniphila</i>         | NC_010655_24462  | cataacgctccgctacggaggaaagcattcXtcaagtaataaggcctgatctgcctcttc  |
| <i>Akkermansia muciniphila</i>         | NC_010655_27     | catgccattgccgcagcaggacaggaataXcggcacaggacattatgatccttctgtcc   |
| <i>Akkermansia muciniphila</i>         | NC_010655_28966  | caaggcgtatttcaatgcgcgtgtattXatccctcagcgtccaggttccatccgtcag    |
| <i>Akkermansia muciniphila</i>         | NC_010655_43235  | caactcttgcagggaagcgcgcttgcctcXgaaggaaatctccctgaagtggcgtgatg   |
| <i>Akkermansia muciniphila</i>         | NC_010655_50597  | gttccaacatcggaaagtggtgttatgXaccgtaaattcccaataaaggttgcggc      |
| <i>Akkermansia muciniphila</i>         | NC_010655_54602  | ccgcattgaccgctgttgcgatcatggaXtgatcaacgtttgatagaaggttgttgc     |
| <i>Akkermansia muciniphila</i>         | NC_010655_78200  | gttcttgcgcgttacattcgtcacgttccaXccattcggcgtcatgtagatgttcggacg  |
| <i>Alcanivorax borkumensis</i>         | NC_008260_103963 | cgaaggcaaatcagcactatctgaggatgaXaggaatgctgttgcgttttgcagctgtac  |
| <i>Alcanivorax borkumensis</i>         | NC_008260_13704  | ccatttgcattggcgtgcagatttacattaXggagttgattgaccagacatcgttagggc  |
| <i>Alcanivorax borkumensis</i>         | NC_008260_30741  | cggcagactgcactgtttagtgaattgcXgccgaacgcaagcacattcgttaccaggtc   |
| <i>Alcanivorax borkumensis</i>         | NC_008260_34864  | cgcacttatcggattgttactaagcctXittgagcgtatggccggtaatgtgctggg     |
| <i>Alcanivorax borkumensis</i>         | NC_008260_39565  | ggatttatagaggtatgacggcagcttagXttaccgtatcccgattggaatggagccc    |
| <i>Alcanivorax borkumensis</i>         | NC_008260_401    | gttgtgaatggatgagcttatgctgtcatgXgagtacaagctgacacgtcaccagaatgg  |
| <i>Alcanivorax borkumensis</i>         | NC_008260_45308  | cacagttgagcgccttatccacgctctttgXttcgttgacattaccggaaacgttgcg    |
| <i>Alcanivorax borkumensis</i>         | NC_008260_52015  | ctggagcgtgaaggagcctcctctctaaXatgatgtgagccaaaggttgcctattag     |
| <i>Alcanivorax borkumensis</i>         | NC_008260_67698  | cccagtgctgaccatataccttaagatgctXcatctttagcggcggccaaccttctcag   |
| <i>Alcanivorax borkumensis</i>         | NC_008260_78486  | cgatccgaaccggtagtagatgctgcccaXcaccatcttgcctgcttattccaagggg    |
| <i>Alcanivorax borkumensis</i>         | NC_008260_7980   | gggtccatgacgcaagatgtctaaactXcatcttaccagctgaggagctatccgcagc    |
| <i>Alcanivorax borkumensis</i>         | NC_008260_83058  | gactgctgtctgtagaactatcggcgcctXcccagctcggccaaattgacagtttaaag   |
| <i>Alicyclophilus denitrificans</i>    | NC_014910_104833 | cggcgccttgcatacgcgctatgacctXagcattatcgcctcctcattgatagtac      |
| <i>Alicyclophilus denitrificans</i>    | NC_014910_114180 | ccatccaagctcatggaagcttccaccXagccgtagtagctgtgaaccatcatgacg     |
| <i>Alicyclophilus denitrificans</i>    | NC_014910_136022 | cagtcgacatatttctgtcaaatatcgggaXcgtgatgttcgggttcggccataatggc   |
| <i>Alicyclophilus denitrificans</i>    | NC_014910_50222  | gccacgctgttctgtaggtcagtgagacXagcgtgtgtttggcgaagaacatccatg     |
| <i>Alicyclophilus denitrificans</i>    | NC_014910_57129  | cgttggctgtcgtcgttcttctctgtXgcctttctgaatcgttcttctgtcaagg       |
| <i>Alicyclophilus denitrificans</i>    | NC_014910_64662  | ccaaatgcgcgggtttcatctgtcgcgtXtgctgatgacctgttgatcgaagattggg    |
| <i>Alicyclophilus denitrificans</i>    | NC_014910_68526  | ctgcgcgacatctcggccttctgtggagXattcatgttggttatgtttactaccggg     |
| <i>Alicyclobacillus acidocaldarius</i> | NC_013205_100615 | ctcagcgtgcaatgttcgattctccactgXggacacacgtgactacgatacagaagatc   |
| <i>Alicyclobacillus acidocaldarius</i> | NC_013205_10412  | gtcgttgcggatcgaatagttatcatatcXatctcgaattcacacgcatgtgccaaaggc  |
| <i>Alicyclobacillus acidocaldarius</i> | NC_013205_17901  | cagcgactaaagaacgcccttgccaatgXatggtgtgatgatgaccaagacattaggg    |
| <i>Alicyclobacillus acidocaldarius</i> | NC_013205_26812  | gagcgcgtgtcgaactgaagatgggcagtXgtgtacgagcgtttctcggaaattgtc     |
| <i>Alicyclobacillus acidocaldarius</i> | NC_013205_51772  | cgttcggtttgcctatgctgttatccctgcXtctacctgcataagccgacacgggtgaag  |
| <i>Alicyclobacillus acidocaldarius</i> | NC_013205_79731  | gcgatctttgccctaatggcctcgataaggXttgatccgtcatgctgatctcctctgg    |
| <i>Alicyclobacillus acidocaldarius</i> | NC_013205_87258  | gcatcgagaactcatattcagcggcagggXgctttgatcgtttgtggtgtacggctg     |
| <i>Aliivibrio salmonicida</i>          | NC_011312_110376 | gtcagtttattgggtaaggcttatgatgagXacgacagaccttggtagagcggcgtatc   |
| <i>Aliivibrio salmonicida</i>          | NC_011312_14540  | gtgtgattgtcgccttgttaacctgttcXaatatcgacgagagaattatgacgcagcg    |
| <i>Aliivibrio salmonicida</i>          | NC_011312_37794  | gagcgtttgggttaattcttccatctattaXttgaagccgcatggtttgcgacccgtgccg |

|                                     |                  |                                                               |
|-------------------------------------|------------------|---------------------------------------------------------------|
| <i>Aliivibrio salmonicida</i>       | NC_011312_47360  | cttccaatggtctatccatgacgatatggXcagcgtcatacaatccgagcattccacagg  |
| <i>Aliivibrio salmonicida</i>       | NC_011312_59286  | ctttaggatgacaatagaagctgagccgaXgtggagaagctctgcctagatttatgcag   |
| <i>Aliivibrio salmonicida</i>       | NC_011312_73129  | ggttccaagtctcggtctaatatagaXacaagaaccgagattacgattgacgttg       |
| <i>Alistipes finegoldii</i>         | NC_018011_109962 | gtatatctgtcgaaatagtcgcatctgtXagcctcagctcgtgcagttctgacgaaag    |
| <i>Alistipes finegoldii</i>         | NC_018011_19915  | gctgtaaacccgctcgcggtcatttctcXaaaccgctccataatagccaactgattgtc   |
| <i>Alistipes finegoldii</i>         | NC_018011_20115  | gctacaaagtggaggttcaaggtcttcgXtattctgcaagataatcgaaccgatgcacg   |
| <i>Alistipes finegoldii</i>         | NC_018011_20317  | catatctacacccaaagcgcgacgccgagcXtattacggatggacaagcaatagctatacc |
| <i>Alistipes finegoldii</i>         | NC_018011_20347  | ccgaccgtacatggctcatagactgcataXtgcctgcgaaactcttatcgctcgtatg    |
| <i>Alistipes finegoldii</i>         | NC_018011_32241  | gtttctgcaacgaagcgttgcctctctXcctttaggtggaagcctcatcgacgagg      |
| <i>Alistipes finegoldii</i>         | NC_018011_49299  | ggattcatcgtttccgctcatcgaaacXattctgtcatcagcgccttcatcgtctg      |
| <i>Alistipes finegoldii</i>         | NC_018011_7188   | gggaagtattgtgcaccggcatcgacgaaXctcgtcaatacaactcgtatgaaccactcc  |
| <i>Alistipes finegoldii</i>         | NC_018011_94629  | gcgtataaagattcgcggaagcaggtcXaaagtatacgccttgcgctgttgattgc      |
| <i>Alistipes finegoldii</i>         | NC_018011_98476  | cctttcgtccgtcgtgacgatgaatgaaXagagcgtgaaatccaacagcgtgtgctg     |
| <i>Alistipes finegoldii</i>         | NC_018011_98969  | ctctattcgtcctacgatctacatcaccXgacgctcctcaacggctggatgtgacg      |
| <i>Alkaliphilus metalliredigens</i> | NC_009633_140326 | gcttccatctcttctgtgctattcataccaXtgagcttgataataagcccgctccctgacg |
| <i>Alkaliphilus metalliredigens</i> | NC_009633_150251 | cggcaataaccaaacctactgtgctcgtgXcctttaccatgctctctaattcgttctc    |
| <i>Alkaliphilus metalliredigens</i> | NC_009633_157809 | gctttgggtatccttgattgttgccacXcgtcgcaccgcaccacttctacccaag       |
| <i>Alkaliphilus metalliredigens</i> | NC_009633_163950 | gcaagtttctacaatggcggtatttctXgcagattctcattgattcccacagccggc     |
| <i>Alkaliphilus metalliredigens</i> | NC_009633_24187  | cattgatcaccttaggcacagctattgtcaXtcggatgtccagtgagcattggccctggg  |
| <i>Alkaliphilus metalliredigens</i> | NC_009633_29862  | caattggtcatgctggagctacagtgcatgXatgataaggaatcggctctttgccatg    |
| <i>Alkaliphilus metalliredigens</i> | NC_009633_84165  | ctaactgtagcatattgtctctgatgcgctXgtttacctcctaaccactcgttacgag    |
| <i>Alkaliphilus metalliredigens</i> | NC_009633_94329  | ctagtcacatgtttcctgctatgattccatXgttcgataggcagcgtatccatccg      |
| <i>Allochromatium vinosum</i>       | NC_013851_100190 | ctgacagcagcagatctcgggcagatcattXtacgcgattatgtcgaatcgagtatcgg   |
| <i>Allochromatium vinosum</i>       | NC_013851_10644  | ggtggcaacatcgagaatctgaaltgatgXactgtgcagctggtgatcaatcaccctg    |
| <i>Allochromatium vinosum</i>       | NC_013851_109254 | gaagcgtgtgaaagtgaaacgggatccttXgtatgatccacaacttctaagcttcggctc  |
| <i>Allochromatium vinosum</i>       | NC_013851_111257 | cgaagcatattcggatcggcttctgtaaXggcctggactcagccaatgtttcacgcgc    |
| <i>Allochromatium vinosum</i>       | NC_013851_1341   | ggatgaaaaggatcccgatctggaagcgggttXaggctcagctgacctcgtttgatccctg |
| <i>Allochromatium vinosum</i>       | NC_013851_49778  | gtcgtttcactcaaccactgaggattcatgXcgtgacctgcctattgatcgttctctc    |
| <i>Allochromatium vinosum</i>       | NC_013851_66752  | ggcagattggcgaactgttcggtccgctgXagatagtagaaatcgaagccggtgacatcc  |
| <i>Allochromatium vinosum</i>       | NC_013851_68888  | catcggaccattggcgtttgaggtttgctaXcacggaaatcggatgacaagcagagaaac  |
| <i>Allochromatium vinosum</i>       | NC_013851_8190   | ctcactattgttaagaagcagaccggtcgcXgagtggtattaaagcagtttgcctgtacg  |
| <i>Allochromatium vinosum</i>       | NC_013851_87295  | cctgtaagtctcagtgagaatgcatggcgtXaattctgatttccagtcagtttcagggtg  |
| <i>Allochromatium vinosum</i>       | NC_013851_93804  | gaagaggactgctcgggatcaacagatagXacttggtcaggatcgcgcgatctctcc     |
| <i>Alteromonas macleodii</i>        | NC_019393_112819 | gatggttgcaactggcatggtatctgtgtttXacaagaccgagcgcacacgggcaaatg   |
| <i>Alteromonas macleodii</i>        | NC_019393_11579  | cctcgtgcagacgaacaagtgaggattggXgataaaccttccgctcatgctcccagag    |
| <i>Alteromonas macleodii</i>        | NC_019393_119070 | cttaccagtctatcacagaccattggccXttctttcgtcgttgggtatttcgacagcgc   |
| <i>Alteromonas macleodii</i>        | NC_019393_154678 | gtcactgactttagtcagactttgatgatXtccgcgcaagagctaccttcttgcctg     |
| <i>Alteromonas macleodii</i>        | NC_019393_46234  | ggttgggattcgtatgccttcgctatagXtaaccacgcgagttgcgttccagtatgcag   |
| <i>Alteromonas macleodii</i>        | NC_019393_80480  | gtattcccgtgttgaagcgtgatgataataXgcaccgaactgtaccattgtacggctgc   |
| <i>Alteromonas macleodii</i>        | NC_019393_89094  | ccagtagcgcctaaagattgtgaccacaXtcagcaatagtacaaggaagcgtacctgc    |

|                               |                  |                                                               |
|-------------------------------|------------------|---------------------------------------------------------------|
| Aminobacterium colombiense    | NC_014011_17925  | gtattgcactataccttcgctttgcccgaXtgcataatagcagcatctgcaaggccgttcc |
| Aminobacterium colombiense    | NC_014011_21390  | ggaagtatccctttgcatccgggaagaccXaagcatcagctccctactgctactgaaac   |
| Aminobacterium colombiense    | NC_014011_24411  | gctccgatccaagaatcccttatcgaagcaXcgccttgttatcagcttggggcgaacc    |
| Aminobacterium colombiense    | NC_014011_2625   | gtaagcaccagcatccctaccatcttggcXgccaataatactttagccttgacatgcg    |
| Aminobacterium colombiense    | NC_014011_28719  | cccagattataggtattggctcagctcctXtagcggaaaggattcccgttccaggtg     |
| Aminobacterium colombiense    | NC_014011_47677  | gtgatctcataaacatcgacactcgtctXcatttgcctctttaccagctcgcggc       |
| Aminobacterium colombiense    | NC_014011_60769  | gggatagcgaattcgcctgtttgcttcatXtggaactggagtagctaccgcagcactgtc  |
| Aminobacterium colombiense    | NC_014011_63743  | gcgctgtagcttggaaaccaaccaatcaXatactacgtatcgttattcacagccagcg    |
| Aminobacterium colombiense    | NC_014011_66010  | catcaaggctgtatggctgattatagcXgatgccatgccaccgctccgctgttacac     |
| Anabaena sp.                  | NC_019427_118810 | gggcatatttgattagtgacattaggctXccctagtagtagtatagtccttgggtg      |
| Anabaena sp.                  | NC_019427_43510  | gaaactaccgcagcgggtgatgattcgggtXtgggaataggcacagaatttccgaattac  |
| Anabaena sp.                  | NC_019427_46977  | cggttatctgcctgcactgtgcagatggaXcatattggcgatgggatggcattattcgg   |
| Anabaena sp.                  | NC_019427_51283  | ggtgcaactaggaacgattggctacaaggaXgctatttgcgtgctgtcatgattttac    |
| Anabaena sp.                  | NC_019427_51339  | ggactggtcctttatgtcctgtgttacgcXtgggtattagggtggtggtggtttatg     |
| Anabaena sp.                  | NC_019427_6559   | ctgtttgagtaaggtttgattgaaccactXactggatgcccatggtagccgggattgc    |
| Anabaena sp.                  | NC_019427_698    | cgacagacaatttaggcatattgccattgXgggcaatgctgtaactctctgttaac      |
| Anaerobaculum mobile          | NC_018024_13549  | ctttctaggcctcgtcaaatagcagggaXcatagccatattcagccgcttccggac      |
| Anaerobaculum mobile          | NC_018024_18482  | gatcacagccctgaagggtatgctaactgXtgggccactatcagcgtacggccagttc    |
| Anaerobaculum mobile          | NC_018024_22213  | gagatcaaacgccgaattgaggtgggcXgagcgcagattgctgaccttggtttacc      |
| Anaerobaculum mobile          | NC_018024_26146  | ccggagcatggataaaggcaggtcatgagaXagttagccggcgacaatatacagcgaag   |
| Anaerobaculum mobile          | NC_018024_29664  | catttctcctcggccatggttattgcaXactcaggtgcataccaacatcttggg        |
| Anaerobaculum mobile          | NC_018024_33341  | cgcggtggaagcattgtcttaagttcagatXtattgttgagcctcatggcaatggggc    |
| Anaerobaculum mobile          | NC_018024_37908  | gtcgtctcccgaaggacgtttacgtaggaXattgccgtaccgtatctctgtatggtgac   |
| Anaerobaculum mobile          | NC_018024_4958   | gcaagcagatatactcactccaagctcaXtctgcgagatggcaaggtttatgcctacg    |
| Anaerobaculum mobile          | NC_018024_51229  | ccacagctcctctgttgaactgtataXtgcctcgtgacctcagggcttgagctg        |
| Anaerobaculum mobile          | NC_018024_56203  | gttcattaggctttagtcctcgtgacttXaaaggattcccgaaccaacacgatcac      |
| Anaerobaculum mobile          | NC_018024_70417  | ccggtgcccaaaaggacgagatgactgtXagaagcaaatcatgccgccataactgatg    |
| Anaerolinea thermophila       | NC_014960_117735 | cggtaccagtgccgggattgaccagtgtatXttcagaacctccaagcattcatgggtg    |
| Anaerolinea thermophila       | NC_014960_153    | caggtgaaacctctgtctggagcaggtctXcctttggcgatgagcggcgtaccataatag  |
| Anaerolinea thermophila       | NC_014960_28627  | cgtttgccagacgggcaatgcctcctgtaXagtatcgttcatcggtgaattacaatcg    |
| Anaerolinea thermophila       | NC_014960_33272  | gatttctcagtagcaggaactcaagggcXagcatgtcctttggattgagcatttccgg    |
| Anaerolinea thermophila       | NC_014960_47213  | cattaccatagccccgctgattgagattXctgataaggcgcggtgtaagtcttc        |
| Anaerolinea thermophila       | NC_014960_55138  | ctcaaggctggcgtctcaatcccgtaXttgtcctgttggaaatcattcagccaatc      |
| Anaerolinea thermophila       | NC_014960_61148  | ggcgtttccgattggtcgaataattacctXccagcaccgttctcatcattcagctgtag   |
| Anaerolinea thermophila       | NC_014960_74028  | ggtctaccagtgagaatcgtagatccgXttcgataaggaaatgtaagccttccaggc     |
| Anaerolinea thermophila       | NC_014960_78426  | ccaatacactggaattctggcgggtggaXtcttgcctgcaatcctgcgagatttc       |
| Anaerolinea thermophila       | NC_014960_95063  | gcggttagcggcgttctgctgtagataaacXaaattcgtgctggcttctgtagattagc   |
| Anaeromyxobacter dehalogenans | NC_011891_112782 | gtattgttcgacgcctcgaacatcggcXctgttgaaggcttattctctgttctc        |
| Anaeromyxobacter dehalogenans | NC_011891_131230 | gattataaccggcaagtcgctttagatggXatggcctctccttgaaccggatgccg      |
| Anaeromyxobacter dehalogenans | NC_011891_135659 | ggatgtgtaattgtatcgttgcttggcggcXggttccatgcctcagcatcattgattgc   |



|                                 |                  |                                                               |
|---------------------------------|------------------|---------------------------------------------------------------|
| Anaeromyxobacter dehalogenans   | NC_011891_137166 | gtattcgacagaagcccgtccttcttcttXaacagcacatcttgacggttctgatgtg    |
| Anaeromyxobacter dehalogenans   | NC_011891_148652 | ctacaagaacttcaagcgaagtatgccggXatcgaagtccagcgtctggtgaccagac    |
| Anaeromyxobacter dehalogenans   | NC_011891_148891 | cacatcgaaatgcgcaatcttcacaagcgXctcaacgtcgcgttctttgatcatctgcg   |
| Anaeromyxobacter dehalogenans   | NC_011891_20944  | ctacgcgaactgggtgacagtcgaactXaaaccgttcagttcatcagcggcgtggaac    |
| Anaeromyxobacter dehalogenans   | NC_011891_40968  | gtgattcagctagtctcgcgtctctcaXtgtgagtagtataaccggcgcatcag        |
| Anoxybacillus flavithermus      | NC_011567_14018  | gcgcggtatagctgcatcatctgtcccaXtgccttgattgccgaaatgctcgtctc      |
| Anoxybacillus flavithermus      | NC_011567_307    | cccagtgaaattgtcaagaagatgaccgXtcaagttctgttgatggcgccacattcgg    |
| Anoxybacillus flavithermus      | NC_011567_35050  | gattgctgtgtcgtcgaagcgttgcaXcttgcttagctacggcgctcaattagc        |
| Anoxybacillus flavithermus      | NC_011567_42950  | gtctctcggaaagacctaaacgagcgtgXccgtggcgtgtgctgatgtaacaacagc     |
| Anoxybacillus flavithermus      | NC_011567_64016  | cgcggaagaatggttcatcaatgcccgctTtctctcgtcgcacatacaggttcaaacatg  |
| Anoxybacillus flavithermus      | NC_011567_76245  | caagatgctgtgacgcgttgatgcgcgXgaaattatggtatattcacaattagcggc     |
| Anoxybacillus flavithermus      | NC_011567_83053  | gtagctaccaattaatgctgcgcgatgacXgcgctcgatgcaactgtctctgcacatc    |
| Anoxybacillus flavithermus      | NC_011567_86329  | caccgagtgactgtgcaatcgttcaagagXcaagcgagatgcttactgttctaccgttg   |
| Arcanobacterium haemolyticum    | NC_014218_27974  | gtcactgaaccactctgaatacctagctgcXggaaagctatcaacagcggctccacgtaac |
| Arcanobacterium haemolyticum    | NC_014218_3829   | gacagggagtgctcttggggcttcataXgatttgacgttcgatgagcacttctctcg     |
| Arcanobacterium haemolyticum    | NC_014218_46906  | ggattcgttgagtgcgtaattgccgcacXatcgcgtggagcgttctggcaataaattg    |
| Arcanobacterium haemolyticum    | NC_014218_54590  | cgctgatagctaccgagggccaagtaataaXttgggtggaacttagccttcacatcgacg  |
| Arcanobacterium haemolyticum    | NC_014218_58667  | ccgggcatcgcgtagcaatcctttgttccXacctccacaatcgaagcactattggaag    |
| Arcanobacterium haemolyticum    | NC_014218_66125  | ggtctgcttctacagtgattcgcgatcccXcgtcatcgcaatgatgccaaccgcagcac   |
| Arcanobacterium haemolyticum    | NC_014218_7624   | gaaccaacgctgactgagcatcaggaateXgatgcgtatttctgtacgattgtggccag   |
| Arcobacter butzleri             | NC_021878_28037  | gccaagtattgtctctgatagactattXgagttctctgaactaccaacttgcgcg       |
| Arcobacter butzleri             | NC_021878_61395  | ctctgagatacagtagcatttacaccagcXtaccattgccattcagaaccagcgactgc   |
| Arthrobacter phenanthrenivorans | CP_002379_122338 | gacgaaacgaggaatcaaccatccagatgaXagggcaggttccctccgatcagaattag   |
| Arthrobacter phenanthrenivorans | CP_002379_27669  | catcacactcattagccggttccgtcatXaacaaaagcccgtaagtgccaggcatgg     |
| Arthrobacter phenanthrenivorans | CP_002379_43937  | ccctgttctgtctctaccggagggtacXctagcaacatagaactttaaggccttagg     |
| Arthrobacter phenanthrenivorans | CP_002379_61790  | gtagaacgcttgcccaagcattcgatcaXctggaccgttaccttaaatggaggtgac     |
| Arthrobacter phenanthrenivorans | CP_002379_78563  | gctgatgccgttgagctcgtgttctctXgctcgacttacctattccgatgattcaag     |
| Asticcacaulis excentricus       | NC_014816_12184  | gtcaaatataaacggatcaagcacttaccXttctgcaggacaattgaagcgtatgctgg   |
| Asticcacaulis excentricus       | NC_014816_18502  | cgggttgggtcgattgacctatttcttaXgtcggattatgagggtgacctctgatctgg   |
| Asticcacaulis excentricus       | NC_014816_28476  | cggctgaccttctcgttctgtctgattXgttctgaggaagcgttaccactaaacgcg     |
| Asticcacaulis excentricus       | NC_014816_33851  | gatgtgtgaaagcgttgacgatgcgaactXcgtcatgcccgtagttacctatgaaagcg   |
| Asticcacaulis excentricus       | NC_014816_38485  | gctcatagccggacagtcacagagaacgXatcattgaatggagcgggtctttatcacg    |
| Asticcacaulis excentricus       | NC_014816_391    | ccattgggctatgtaatgccgttactctgXttaatcagaagcagagggccacttattg    |
| Asticcacaulis excentricus       | NC_014816_44338  | ctggatgggtacaagggtcgatttacgcXgatttctaagtgtctggcgatgattg       |
| Asticcacaulis excentricus       | NC_014816_4730   | gcccttacggccgagattccagcgttaXttcgtcagaagatgtgatcaaatagacac     |
| Asticcacaulis excentricus       | NC_014816_57525  | gacatctgcaccagcattggcctcgtattXggttccagtgattgctgatttacgcc      |
| Asticcacaulis excentricus       | NC_014816_86268  | ccctgatgttctgtctttaggactgtgaXagcatcaggcagcaagcaatccgtccgtg    |
| Azoarcus sp.                    | NC_020516_24025  | ccacaatctgccaagatgctgtattcctaXgaccctcaaaaggagccgaccatgaacac   |
| Azospirillum lipoferum          | NC_016622_10564  | gggatcatggacaagtgaagatgaagtgcaXtagcgtcgttctgttccctaacgggac    |

|                        |                  |                                                               |
|------------------------|------------------|---------------------------------------------------------------|
| Azospirillum lipoferum | NC_016622_16018  | ctgttgcttgatggccaccggccatggcgXtgcagaatgtggactttcctttatacgg    |
| Azospirillum lipoferum | NC_016622_19546  | caacgatcgcaggagcgtattccacatcacXacagtatatgttcgctacacatagatggc  |
| Azospirillum lipoferum | NC_016622_33561  | gagatgtagagctcgttaactccatctccXgggcagagccgttctcgagaagcttgatg   |
| Azospirillum lipoferum | NC_016622_38323  | gtccgtttgggtggatgtgggaagccacacXattctatgaaccattgtgcgcatcaacg   |
| Azospirillum lipoferum | NC_016622_39746  | ccttcgtggaggaatcccactaacatcgtXatggctgatggacgaatcggcctacaatg   |
| Azospirillum lipoferum | NC_016622_51366  | gagcggaggaggatgatgctctattgggXaccgacagaatgttcttcatacttcggcc    |
| Azospirillum lipoferum | NC_016622_80526  | gcaaacgcgtaacaccaatgatgggatgtXccacctctctataccaggaaggatgcc     |
| Azospirillum lipoferum | NC_016622_84852  | ctcctgaccatcatccttgagcgggatcgtXgtcctgtaattctgtgccatggtctaaag  |
| Azospirillum lipoferum | NC_016622_91911  | gatgacgagatcccagtggaattacgaccXggcaattccgtctcagccataggaacaag   |
| Azospirillum lipoferum | NC_016622_96787  | gctttgacaatccgctggtctcgtactXtgtgtgatattggaagaataaacacgcg      |
| Azospirillum sp.       | NC_013854_104631 | gcgtaattgatccgatatcggattgtttXatggacagaatcggtcacccttgaccatcg   |
| Azospirillum sp.       | NC_013854_14003  | gaaattgacggaattcgcgatttcggttaXttccgacgcttcccgcaaatccggtcc     |
| Azospirillum sp.       | NC_013854_30359  | cgacgaggttaatggcagcggcgaagcttgXttgacattcatgtgttaccagacggtag   |
| Azospirillum sp.       | NC_013854_38823  | gtaattggcagcggcgaagctgtatcagtXtcatcgtgttccaagacggtagcgag      |
| Azospirillum sp.       | NC_013854_52799  | ggtacggttcgaaggctcaacatcgcaccaXggatgcatactcaggaggtgtgataagc   |
| Azospirillum sp.       | NC_013854_59457  | cacaatataggctcttcggaacgaacgacXtgcgatcatatccattcttcggttcgccc   |
| Azospirillum sp.       | NC_013854_80077  | cggagataaacgtggcgcaactatacacaXtttggctgcgcccattgtgtgatctcc     |
| Azospirillum sp.       | NC_013854_8133   | cgactcgaagacaagaatcggcggttcaXctgatccttgaggaggttgagactgaactg   |
| Azospirillum sp.       | NC_013854_95273  | ccttctcactgggtcaactccattctcgXttgtctgaaagaccgcgcgactgaaag      |
| Azospirillum sp.       | NC_013854_98997  | ccaaacagagggatggagcttcaggcgtttXcggattcgattgaaagcgtgaatccgatcg |
| Bacillus coagulans     | NC_016023_10057  | cggcaaatcgcgcgatgacatggctgtgaaaXcacgttcacgcatatccgggtcaaacg   |
| Bacillus coagulans     | NC_016023_106119 | catcgccacgcctttatattaaacacgagXgcatcgtcgaacatgaacatgctctgcc    |
| Bacillus coagulans     | NC_016023_113379 | ggttcataaatgctgtaaaccggctcggcaXtatactcattcagtgatcggcgaatgagc  |
| Bacillus coagulans     | NC_016023_14505  | catgctttatgaccgcctaaaggaaattccXctttctggatagcggctccgcaataaagc  |
| Bacillus coagulans     | NC_016023_18630  | gcttaaattgaagatgcatgattggtcatXgtcccgcgtacatcgcgtttcatatcgcc   |
| Bacillus coagulans     | NC_016023_24013  | gaacaattcactcgtcaaatgtccggttXcggccgggactgctcaaggctgattccc     |
| Bacillus coagulans     | NC_016023_34017  | gcttcaggccctttgatcccaatccaacaXgggtagaatggtggcaagccatttaac     |
| Bacillus coagulans     | NC_016023_63697  | gcaccgaaaccggtattcggatgccgtXgttcggtattatcatgatcagctcgcg       |
| Bacillus coagulans     | NC_016023_92647  | gtaaagacgtcggaaatgaggggtgaaccXgatattccggtatcatacgaagccgcgc    |
| Bacillus licheniformis | NC_021362_10411  | ggagcggcagatattgacgaactcatctatXttatgctgatcgaagacagcggatagcc   |
| Bacillus licheniformis | NC_021362_12147  | cggatgcttatatgctttgatctattXcctggctgtttggttcggcgtgtagcgg       |
| Bacillus licheniformis | NC_021362_13076  | gttcagaacgcctcactgatgatggaagXgttccgaatgtccgcatctgtatcattcc    |
| Bacillus licheniformis | NC_021362_15476  | gaaccggaggccgattatattgactggXaaactgaggatgtcgcggaacgacagtc      |
| Bacillus licheniformis | NC_021362_16965  | gctgcacgtcgaccgatgaaattaaagcctXggatgatcattcaggcgaatgaagcagg   |
| Bacillus licheniformis | NC_021362_17265  | gtctcctgatcaagcggattgtttgtcgtXcgaaggtgatcattcggattgagctcagc   |
| Bacillus licheniformis | NC_021362_3612   | ccagcaaacgctatttcgggtattaaagcXgatcgagatggttccggcggaagagaagc   |
| Bacillus licheniformis | NC_021362_8630   | catatcgccggcctgagaaatgctgactXcatcagctatgctggaagcattcttaag     |
| Bacillus pumilus       | NC_009848_103157 | ccagtagatggcttctgcttggtaactgXcctactgtactgctgacaggtgatccaccg   |
| Bacillus pumilus       | NC_009848_115767 | gatttggatcaaatccaggaattgaXtcacgaaggtctcggccggtgtgtcagc        |
| Bacillus pumilus       | NC_009848_11688  | ccactatgctgagttgaaacatcatagXgacatcgtctgaatcggcgcaaatgaaag     |

|                              |                  |                                                               |
|------------------------------|------------------|---------------------------------------------------------------|
| Bacillus pumilus             | NC_009848_123021 | gcgccgtccaagaatcggftaaatataaacXttaagtacaccgtaccgccacagcgacaag |
| Bacillus pumilus             | NC_009848_36642  | gcagctatggatcacagaagacaggaaggcXcgtgttgatcttcttatgtcacaagagg   |
| Bacillus pumilus             | NC_009848_56100  | cgfgacttgctgtgtggctacatccagaaXaggctgtgccgttcggatgacttccg      |
| Bacillus pumilus             | NC_009848_64342  | cgcttcataaacacgctcgagacttgattcXgacaatgactgcgatatctccggftgaatg |
| Bacillus pumilus             | NC_009848_79480  | ctctgcctgcgacttccatcacaacaacXatadcgcagcattggctgaaacccattg     |
| Bacillus pumilus             | NC_009848_83626  | gtggcatgactgtcatggtaccgccactXcgtatggtgattgagtgagaggttctctg    |
| Bacillus pumilus             | NC_009848_8970   | caagccgctcaagtatactggtgcttcXgaagtcgctcgttgatcaaggagcatg       |
| Bacillus pumilus             | NC_009848_98088  | gagcgagaagatctccgcttctctgtaXcgtatcgatgattgatggcggtatgatg      |
| Bacteroides fragilis         | NC_016776_110268 | ctgaattcgcactgagcatctttgctgaaXgtaactctctctgcaagcttctcagg      |
| Bacteroides fragilis         | NC_016776_112615 | ctgactgctttgtcagtgctgattcttcXggattcatctctcgcacatagcatccatc    |
| Bacteroides fragilis         | NC_016776_115035 | gacgaaccgactgaatcgatccggatagXggttggcagaagggtaccagaagatccgaag  |
| Bacteroides fragilis         | NC_016776_120905 | gcataaccgttaaaggtctgaaaggcggacXaaatgacaccatcagccactctgctcc    |
| Bacteroides fragilis         | NC_016776_126730 | gatgctgagtgatgacgacatcgaagccXcaacagaacaccgtggacgcatcttcc      |
| Bacteroides fragilis         | NC_016776_143977 | gacggaactcagaatcaggatgcagcctggXtgtgcttataccgtagcgtctatccg     |
| Bacteroides fragilis         | NC_016776_176151 | ctgccttcacgggatcacaaccggcgcaXtcatctgtgattggftataccgagagcac    |
| Bacteroides fragilis         | NC_016776_38698  | cgctactatgctatagactgtgctgaaacatXcccggcaaccgttctgcaagccctatg   |
| Bacteroides helcogenes       | NC_014933_109151 | gtaaaggtagtggacgtgaaagggaacaacXacagaagactgcgtgcagtagccatcaag  |
| Bacteroides helcogenes       | NC_014933_133073 | ctcagacgtacgcatctccaaagcaactXacacggctgtgatcattggatccgcaag     |
| Bacteroides helcogenes       | NC_014933_18395  | gcccacgcctacgatatagcgcacatcctgXcagattgtgtagttaccctgaaattctc   |
| Bacteroides helcogenes       | NC_014933_22605  | catgtagccccacatttctcgggctgcatgXtccctgaaacgtggaagaccggtagcttc  |
| Bacteroides helcogenes       | NC_014933_252    | caatatccgtatcgtcagctgcaactatXgacccatctcaggagtgctggatccagac    |
| Bacteroides helcogenes       | NC_014933_28964  | cacgcccagacgtatatacagaaccaccgXcatctggaagataagcaactcagccagcc   |
| Bacteroides helcogenes       | NC_014933_43278  | gagagcgtcacttcttctgtggcaaacXgcctccagctgtcttggagagatgatg       |
| Bacteroides helcogenes       | NC_014933_52232  | ccactctgcaactgaaccgaaagctcaactXtgggcaatggcagcaatctatccgcaatg  |
| Bacteroides helcogenes       | NC_014933_59426  | gtattgggtgacgaactgcgagaaggtcatXtttcaatagttcaggtgtgttcaggcg    |
| Bacteroides helcogenes       | NC_014933_90391  | gtacggtagttatcatgtcacggatgtcaXcccatggctgcaatctcctgtcggagagg   |
| Bacteroides thetaiotaomicron | NC_004663_108658 | ctgccgagagtgtagacacatgaccggtgXcgaactcttaacctgaagttccttacggg   |
| Bacteroides thetaiotaomicron | NC_004663_123805 | ctgcaatacctttatagttgggatgccagtXtctcggcactcgtaggtaaagtgccatc   |
| Bacteroides thetaiotaomicron | NC_004663_12658  | cagagagaatagtagcacggacaggagtaagXtagaacaactcgggacgtgtagtaggaac |
| Bacteroides thetaiotaomicron | NC_004663_135363 | ggttctccgtggaagccaacagtcaattgXggttacagcagcttctatggtgtggaacg   |
| Bacteroides thetaiotaomicron | NC_004663_139032 | ctgaccaatactgctgtctccgggttcaXacaacgatgtaacggatcggcaatcttg     |
| Bacteroides thetaiotaomicron | NC_004663_160161 | cggttgtgttaccgaacaatacacttcagXtccattcgtcgtgaatgccatgaaccgc    |
| Bacteroides thetaiotaomicron | NC_004663_164466 | gtaacttcccgtttgacgaaactttctacXtgcggattgccgtgcttcccgttaacag    |
| Bacteroides thetaiotaomicron | NC_004663_170469 | gtcgggaatattccgatccagccgttcXatcatggagacttcatcgaacgcaacttg     |
| Bacteroides thetaiotaomicron | NC_004663_204060 | gatagccctgttctcctctgagttgtctXtgattacaagttcaatgcttcggctcgc     |
| Bacteroides thetaiotaomicron | NC_004663_208574 | ctttaccttccggatgaaagtgccatcggtXagcgcattgaaagcaatccagcgtgcc    |
| Bacteroides thetaiotaomicron | NC_004663_233    | cggaaactcggagtgcccaagttcagttatXaactgtggatagcggtagggcatgtgaac  |
| Bacteroides thetaiotaomicron | NC_004663_56511  | gagtgtagacggtagcaacagtcggacttXactcctccatccatcctcctccagac      |
| Bacteroides thetaiotaomicron | NC_004663_65350  | gtccgcaatgggacatttgcagtgctataXataatccaaatccgattcctcggcgacc    |
| Bacteroides thetaiotaomicron | NC_004663_78262  | gtaaactcatcgggctctgctgatgagaXaagaactatcgctattgctgctgagaacc    |

|                              |                  |                                                               |
|------------------------------|------------------|---------------------------------------------------------------|
| Bacteroides thetaiotaomicron | NC_004663_99282  | gaccgcgctccgtcaatctcaactcttacXctttccaacatcggtacggacggatacatc  |
| Bdellovibrio bacteriovorus   | NC_019567_113542 | cgtagctgtccttattcactctggacggcaXtgcccatggcttctcatagccataatagc  |
| Bdellovibrio bacteriovorus   | NC_019567_40210  | gggttacttgatgtattgaataaggtctgcXttgcagatccaccaagagcagcggaaatcc |
| Bdellovibrio bacteriovorus   | NC_019567_56426  | cacaacgaactggtgaaactggtttacgagXctgatgaaagaacaaatgtccgtggaggcg |
| Bdellovibrio bacteriovorus   | NC_019567_5946   | gttcactctccagaactgatcacgacXtcattgttcagggtggagggttctcag        |
| Bdellovibrio bacteriovorus   | NC_019567_71172  | ccfttaacacatgcgccgttctctgtgXtcccaagccagaagaatccctggacaagg     |
| Bdellovibrio bacteriovorus   | NC_019567_78976  | cattcgcgtggatctcaaccgcatcattcXtcatagtactgattcaggaagtcaccagc   |
| Bdellovibrio bacteriovorus   | NC_019567_94331  | ctggatgattcctggaaagacgctgcgaaaXaaggacctaagcttcttaccgcggacgc   |
| Beijerinckia indica          | NC_010581_128288 | catacaaggcagacaatgtccattacgacXgatgctccaattcccgatcggcttcccg    |
| Beijerinckia indica          | NC_010581_453    | gtcgatgatctgaaggcggatgcttgXgccaagacatgagcgcacatcaagacg        |
| Beijerinckia indica          | NC_010581_45458  | ccgcataaatcagaatggtggttcgagcgXaggaaatcagggccgcaacgagattgaac   |
| Beijerinckia indica          | NC_010581_61822  | gcaatgatcgaagcaacgattctgaagaXtccgccacaataagagcctcagaccgcgcg   |
| Beijerinckia indica          | NC_010581_79830  | cttccaccggattcatggatcaggatagXcgtcacatgacggcggaatgtattctccg    |
| Beijerinckia indica          | NC_010581_98685  | gtgagcatcttggatcattcttgttatXtcttctctcgttaagcgctgcgcctgc       |
| Beutenbergia cavernae        | NC_012669_1173   | ctatcgataaacgatagaacctatcgcggXccgaacgccatgacgctactccctc       |
| Beutenbergia cavernae        | NC_012669_12471  | gttcacaagaggtggcgtcgagttctctgXatgcagcagacgctaattcatcgaacac    |
| Beutenbergia cavernae        | NC_012669_140351 | cgttattcaggtgttcgctgggctaatacaXgggctgctggaaatgacgttgattgtcc   |
| Beutenbergia cavernae        | NC_012669_151094 | gatatacgttaccgctgctccggttcagXaacatcgtttgacacgcgatacgcg        |
| Beutenbergia cavernae        | NC_012669_16062  | ctcgatgctgatgaggaaagaaactctgcXcctgattcatgagggtcatgctcttagcg   |
| Beutenbergia cavernae        | NC_012669_3639   | ggacgtgaccgaggaatcgtgtcacaatgXctattgggagcttcgctggcattatg      |
| Beutenbergia cavernae        | NC_012669_58047  | gtcacgactgcactaatacaccgttgtaXcttgacgcttcgtagtacaccgttgtag     |
| Beutenbergia cavernae        | NC_012669_58897  | gatggcgaccgtacgtaacgctcacatcXatgctgatgattgattgtgacaatctgc     |
| Beutenbergia cavernae        | NC_012669_91921  | gtccccattgggcacgtaaacgctatgcXccttcaatccggaactgttatgtaacacc    |
| Beutenbergia cavernae        | NC_012669_92474  | ctcaggagaccggagaaccgaacatgtagXccttactgctgatgcttactgttaagcgc   |
| Bifidobacterium adolescentis | NC_008618_22622  | ctgtgggagaaggcctgtgggagaggcaagXtgtgattcccttacaggttgataactagc  |
| Bifidobacterium adolescentis | NC_008618_30567  | gagaatggtgtcaagaactgacagccagXggctcagactcgtgatcgaacctgttc      |
| Bifidobacterium adolescentis | NC_008618_41593  | ctcgtcatcgggtgaagctgacgattctgtgXaagtccgtagatccggctgcaatattc   |
| Bifidobacterium adolescentis | NC_008618_47275  | gtgttctactgtatcagtgagctcagtXccgctgatgagcagagaagtccgcaag       |
| Bifidobacterium adolescentis | NC_008618_55429  | gaaaggcggaaccgaccggtattggtcgtXcctcgaatcccacgacatagatagc       |
| Bifidobacterium adolescentis | NC_008618_7781   | gtaagctcggctgttcggtgattcttgcXctgggtatacggttacgcactcactgtg     |
| Bifidobacterium animalis     | NC_022523_18008  | cgttgagtggtatgcctgcgcggttctctXcattgatgctttgaacgaacgttcgggag   |
| Bifidobacterium animalis     | NC_022523_20042  | gctcgcaccagttgagcacgctgacgattcXtgataggtatggtcacgatattcgacg    |
| Bifidobacterium animalis     | NC_022523_23386  | cgcggtatgttcccatggtgatgtagcagcXagcggataaagcgcaltgacgagaatcag  |
| Bifidobacterium animalis     | NC_022523_26108  | ccgttggcgaatacgcactacatctaagcXcactgttccgggttcacatctctctg      |
| Bifidobacterium animalis     | NC_022523_32836  | ggaatatacaggcgaaggactgagatgggXcgcgacatcgaattgctacaatgaacacc   |
| Bifidobacterium animalis     | NC_022523_34533  | gtaatagtccctgtaacctattgctgcXatcgtagccatgatcgcagccattgttc      |
| Bifidobacterium animalis     | NC_022523_51666  | catggattctcttactgctctgtgttccXcgttccactcgggtgagattgatccgg      |
| Bifidobacterium animalis     | NC_022523_54551  | ccatgacgctccagctcgcacataactcaXcaatcgctgcagaatgtacacgacatcac   |
| Bifidobacterium animalis     | NC_022523_57723  | cggaattgctcggatcacatctgacagacXcgtacattatcagctttacgcttgcg      |
| Bifidobacterium animalis     | NC_022523_61455  | gagttctctgtgctgactgtgagccgattXcgcgatcattggacggctcatgagcattac  |

|                            |                  |                                                               |
|----------------------------|------------------|---------------------------------------------------------------|
| Bifidobacterium breve      | CP_006713_24898  | gttactgctgtatatacgtcaagtttcttXggcgggaaatcagctgatacagccgattcg  |
| Bifidobacterium breve      | CP_006713_28577  | ggcgtcacgatatgagcattgccgatatcgXattcctgtacggattggtggcactatgcc  |
| Bifidobacterium breve      | CP_006713_30079  | ctgctgaaccggaaacagcaaatgaaatctcXaagccatcgaagtggtggaacagcccg   |
| Bifidobacterium breve      | CP_006713_3387   | gttgcgttccagccgtatgtgctcgcggcXatagttcacaatggtgcatagctgtgac    |
| Bifidobacterium breve      | CP_006713_35610  | gttcgtatgagccgaagaccgtcaacgtcaXatgccagtaaaagtcggtgagctctttg   |
| Bifidobacterium breve      | CP_006713_384    | gtaaccgagttcttcacagacctgcagaatXcggagccaccagtcgctttctgtgttc    |
| Bifidobacterium breve      | CP_006713_44211  | ctggcgaaggtaggtgtatgtggtacttgXatcgtatggcattcccgcgactcatgctg   |
| Bifidobacterium breve      | CP_006713_6063   | ggtcgcagtagtatgactactggtggtggXtcgaggtcattgcatcaggctcgtgaac    |
| Bifidobacterium breve      | CP_006713_78404  | ccattatgtggccaccggctcgaattccXtatctgacggctcgggtgtgaaatctcgtg   |
| Bifidobacterium dentium    | NC_013714_106    | ccatcatgtacatctcacggctcgcgctcXagcccgtacttatatagttcagagggttc   |
| Bifidobacterium dentium    | NC_013714_11759  | gccatacctatgagcctatcagatcttcaXaggc caataccatcaccggctcgaagaatg |
| Bifidobacterium dentium    | NC_013714_41903  | ctttaccgagtcctctttgggtaaggcaXgacaataatcgtcgtgtcagtcaggacag    |
| Bifidobacterium dentium    | NC_013714_49350  | ggactgagcgaatggtgtgatgaactcgXatgatcctgttcagcgtggcattctcggac   |
| Bifidobacterium dentium    | NC_013714_55073  | gctaccgaggtcgcgtacatcaaggaagtXttcgattcagtcggagcattcaaatcac    |
| Bifidobacterium dentium    | NC_013714_70656  | ggcatcgtgacgtagcactgaatcggactgXgatccactgatctgttctcattgagcg    |
| Bifidobacterium dentium    | NC_013714_73681  | gccaagtatttcaggttctgcatacccgctcXtcatcagaatcgaatcctgttgatgccg  |
| Bifidobacterium dentium    | NC_013714_81251  | gaggtgctgatgagttgaggttaacgaatXcagcggcttgtagaacctaccggagtg     |
| Bifidobacterium longum     | NC_011593_21541  | gccgaattcatgtatgacaaggacgaactgXggcgcaggtatctcgcattcctagccttg  |
| Bifidobacterium longum     | NC_011593_31633  | gttcaatggcgcacgatgatcagaatagcXcaattccagactgtttctctattagccgc   |
| Bifidobacterium longum     | NC_011593_43129  | gatttcggatggccataatcgacatggttXtatagctctatgaggtccgatctggtgaag  |
| Bifidobacterium longum     | NC_011593_56023  | ggaagtaccagatttaggagatatgaccaaXtcccaaaagcgtgctcagacaacactatcc |
| Bifidobacterium longum     | NC_011593_60657  | ggtcacgccaagcaacaaggtatgaaacgaXcaaccggtggcattgacctgaacaactc   |
| Bifidobacterium longum     | NC_011593_66880  | gcagagtgcgggacgctagctatgtgcatXaagaatggcagaattccaatgatttcgag   |
| Bifidobacterium longum     | NC_011593_82886  | gcttatccgcaaatcagcttactggttctgXgttcaatccgaactatgcgctgtgtgcagc |
| Bifidobacterium longum     | NC_011593_87747  | gcatattaccgtgtagtgcattgattccatXccatcaatcggctcagaccgcttccgac   |
| Bifidobacterium longum     | NC_011593_89923  | gcgtatagctctgcccgattgattcaatXtaccagtaggtgttcatggcccgatgcc     |
| Bifidobacterium longum     | NC_011593_94190  | ggtcaagccaacctatcgtataacgctctcXcttctccatgatcgtgtgaaagtattc    |
| Bordetella pertussis       | NC_017223_21327  | gctcgggttgggagttctgtaggtgtgaXtagtggtagccagatttcatggcactg      |
| Bordetella pertussis       | NC_017223_37151  | gcatcggctcgggttgggagttctgtaggXcagttgtagtggtagccaggatttcatg    |
| Bordetella pertussis       | NC_017223_42258  | catgaaatcctggctacaccactacaactgXtaccagaactcccaaccagcggatgc     |
| Bordetella pertussis       | NC_017223_59418  | gcatcccaatcgtatgaattcagatggccXtgccttggcgaattcagggatgaaatcc    |
| Bordetella pertussis       | NC_017223_65327  | catcggctcgggttgggagttctgtaggXagtgtagtggttagccaggatttcatgg     |
| Brachybacterium faecium    | NC_013172_116562 | gcggcatcgcgaccttcggattcctcagctXtactttatcaatcatcagtaggggtg     |
| Brachybacterium faecium    | NC_013172_38565  | gtagaagaacctggacatccgatgagtagXggatcccgaattcaccgaaactggaacag   |
| Brachybacterium faecium    | NC_013172_63189  | cgaaaagggtgcgaaaggtcccattgcaacXtccactattgagatgaatcgtgttcaatg  |
| Brachybacterium faecium    | NC_013172_91144  | cactctgacactgagctcaccgagctcttXgaaacaccagagcagaatgggctcgaacg   |
| Brachyspira hyodysenteriae | NC_012225_30838  | gcggagaggtgctgtagaggctagaaacgXttgctactgcaatgcttcttatattag     |
| Brachyspira hyodysenteriae | NC_012225_36006  | ctaatgatatgatggctaaagctgaagctaXatactctggcggcgtggtatgagagctg   |
| Brachyspira hyodysenteriae | NC_012225_383    | ctattccgatactcgggtggacatgctgXtaggatatatcatggaggtatggttacag    |
| Brachyspira hyodysenteriae | NC_012225_42221  | cccttctagagaataaccgcttcaaatgXcaagcatacctacatcattgaaggacctg    |

|                             |                  |                                                                |
|-----------------------------|------------------|----------------------------------------------------------------|
| Brachyspira hyodysenteriae  | NC_012225_50103  | caactatactggaacgaaggagctgattXcgcagagtaacgctcaccttacagacagg     |
| Brachyspira hyodysenteriae  | NC_012225_50125  | gcattccgcacagtaatgctcaccttacaXctactctgtgcggttacactctgctgcgg    |
| Brachyspira hyodysenteriae  | NC_012225_52866  | cgacagagtaataattcggaggagatctgcXggcagcattggcagatcatgttactgtagg  |
| Brachyspira hyodysenteriae  | NC_012225_58471  | gtgtcgctacaataacctactgttgcttaXtatgctcgtcgacgaagtcgcttagcag     |
| Brachyspira hyodysenteriae  | NC_012225_97681  | cggtgtaggagggaagcgataaggatgcacaXtaccatagcaagagctacacatcaggcagg |
| Bradyrhizobium japonicum    | NC_004463_1055   | cgcatgaaggaaactggttctgtgataacXggatgactgctgaggcaaacgatctgcacg   |
| Bradyrhizobium japonicum    | NC_004463_130800 | gcccactcagttcgcaaacgagatcgcaXgttacgtgcaacatctatagccgacagtc     |
| Bradyrhizobium japonicum    | NC_004463_137937 | gagccgacaatctctatgtccttggcgtaXtgtatctgaagtcgatacaactcttgcgg    |
| Bradyrhizobium japonicum    | NC_004463_168957 | cgccatccgatagagcgggaatccgagtXtcgttctccaggtcaattcgaagctg        |
| Bradyrhizobium japonicum    | NC_004463_194639 | gatcgcttgaagagatgttgggtgtcacXgaaagagtcaccgccacagcaattctc       |
| Bradyrhizobium japonicum    | NC_004463_201007 | ctacctgaaattgtcgttcattatctgccXtggttagaataggcgtgccgtagcctgcg    |
| Bradyrhizobium japonicum    | NC_004463_22172  | cgattcacaagccagaagcacttaacctaXgttctgtgtgaagtgtggctgttac        |
| Bradyrhizobium japonicum    | NC_004463_234523 | ctgtcgtcaagccgatgaccgttcaccacgXtctgacgtacgacatcgatagttgatg     |
| Bradyrhizobium japonicum    | NC_004463_24566  | ctggtgccgaactcctcggtaattgtggcXtacacgctgactcccttccaatcatcg      |
| Bradyrhizobium japonicum    | NC_004463_248022 | cgagcgaagcgttgaatagagaatcgttXatgtcgtgctgcttctcgctcgaacgac      |
| Bradyrhizobium japonicum    | NC_004463_257701 | ctgcgagcattggatgctccttcaaaacaXgcgctgtatcgggagttcatttgattg      |
| Bradyrhizobium japonicum    | NC_004463_279403 | gagttgaagctgacaccgccggaatatgcXtatagaccgctctcgattgtatgaacc      |
| Bradyrhizobium japonicum    | NC_004463_280485 | gagcaatgagttcagcgttagacttggagXtcgtctcgtatctcttccgacctgac       |
| Bradyrhizobium japonicum    | NC_004463_283331 | gtgtcggctgatgacacctgaaatattXagccagttccaggtgccgagcgatacgaac     |
| Bradyrhizobium japonicum    | NC_004463_291649 | cgtagagctccaatcctggtgaagcggXtgaaggttcggtgttagctatagcctg        |
| Bradyrhizobium japonicum    | NC_004463_32955  | gcagatgctgcgatgcgaagaggatataXaccggtcattgacgcaatattacgattcg     |
| Bradyrhizobium japonicum    | NC_004463_33408  | gaaatgacgaactgaagaagacctcatXttacgaagagcgcgcaaatattcgtggc       |
| Bradyrhizobium japonicum    | NC_004463_47570  | cctaagccctattccatcgaccgctcXattccctctgaagtcgctgaagccgctac       |
| Bradyrhizobium japonicum    | NC_004463_58573  | ccaatgacctcagcttactgccggacatXttcctcgcaagagctgaagatcaacgag      |
| Bradyrhizobium japonicum    | NC_004463_75588  | ccctacatgtaggtgacaatgctcatgcaXtggcgcacaccatgacctctcagatcgtg    |
| Bradyrhizobium japonicum    | NC_004463_97488  | gaaatgacgaagtcgttacctggaacgaXctgagtgctttagcgaacatgttagcc       |
| Brevibacillus brevis        | NC_012491_101432 | cacatgttccggattataggtaccaactgXacacagccgagctgcgccagattcaaaag    |
| Brevibacillus brevis        | NC_012491_110750 | cttttcttgatggaggattcgttatcagcXctgtttaccggcagaatccacgctccgg     |
| Brevibacillus brevis        | NC_012491_121    | ccgattatgccacgatccgtagcgatgttcXctcgtgacaaggagctcatttctgggatg   |
| Brevibacillus brevis        | NC_012491_13242  | gagcgccttcgtacagcaggattgatcgagXcgcgtatctctgtacagagttagctccg    |
| Brevibacillus brevis        | NC_012491_132634 | gagacgacggaaccaagaatactgtgcttXgctccccaatcgtttctcatgtgatag      |
| Brevibacillus brevis        | NC_012491_154006 | gagcagatatacagcgcctagttcatggaXcagcggctacactcctgccaatagtagtac   |
| Brevibacillus brevis        | NC_012491_175023 | catgattgtatccctcctgcttaactcggcXttccactgtttcatatgaaacggctgcc    |
| Brevibacillus brevis        | NC_012491_209839 | gcccaatgattctccagccattcatcaagaXagagacaagaaagcttggcagcgatacc    |
| Brevibacillus brevis        | NC_012491_24164  | cctgatgaagacaacgaattgtactactgttXctgtcccagcggcattgatctgcctctatc |
| Brevibacillus brevis        | NC_012491_47563  | ggagcaaacgctgtagtaggtggcgtgcgcXatacatcttgcattggaacctcacc       |
| Brevibacillus brevis        | NC_012491_58863  | gctgaggtaacggatgtaaacagtactatXctacagctgtcagagataaacctgatgag    |
| Brevibacillus brevis        | NC_012491_90650  | gatacctcagtatgactgatgactcgcaXtgcggatgttccactgtctgcaaatgac      |
| Brevundimonas subvibrioides | NC_014375_105541 | cgctgcttgatcgacgcaagggctcaggXtgtgtgatctcgagttgcaaacctttac      |
| Brevundimonas subvibrioides | NC_014375_11438  | ctgcgcttgcgatcacaatgttctgctgccXatggcgacaatctaggaatataactcttc   |

|                             |                  |                                                                |
|-----------------------------|------------------|----------------------------------------------------------------|
| Brevundimonas subvibrioides | NC_014375_38692  | cctcattataacctttatcgcggtctgtgacXaacggcagcgctgctatgttcgatggcatc |
| Brevundimonas subvibrioides | NC_014375_48364  | cagagtatcagaacggctgagcgattaagcXtggtatggcgtagacttggccattcg      |
| Brevundimonas subvibrioides | NC_014375_6050   | ggagacgttcatgtcccgtcaggtgcaaaXcgtttagaatgacttgcctatgccgggaac   |
| Brevundimonas subvibrioides | NC_014375_61896  | cagatcattgttccgaaagaattgtgctXcgcctgacacacgctatgacctggggcgc     |
| Brevundimonas subvibrioides | NC_014375_92303  | cggagagaactgcaacagttgtggtgatgaXgctgtgctggagcgtaacataggatggc    |
| Brucella abortus            | NC_006932_10513  | cggcgcggatttcggttccgaaatgcgctXccttaagaatgccgaaacttacttcagtg    |
| Brucella abortus            | NC_006932_13997  | ctgcatgtcagctgaaacggccttagtXgctcataggtcagtaaaagtggtctaatgcc    |
| Brucella abortus            | NC_006932_24796  | gtcgaagccgacacgacctttatcgcatXgcattgatcgacgaacgtctgggtgagg      |
| Brucella abortus            | NC_006932_30495  | cggaaattccatgggtgctgaggcttcaXttgagaagctcacgggattgtcgcgtgc      |
| Brucella abortus            | NC_006932_4428   | gtaacttattgcccgtagctggtgtagcgXattggtgtaacggcagcgtcgtcgaagcc    |
| Brucella abortus            | NC_006932_44940  | cactacagcccaacctagagcggtttctgXcgttatacaatagtcggttctctctgc      |
| Brucella abortus            | NC_006932_62060  | gatgatctgaatactgcacaggagcttgaXcctgatcgcatcagcacaagcctgttgc     |
| Brucella abortus            | NC_006932_64926  | gataattattgcggtcgcggttccgctattXagtaactgttctctctcggcatttcg      |
| Burkholderia gladioli       | NC_015381_110002 | gagtagttaccgaatcatcttgagatacatXtagccttactctggcccaactcccgaag    |
| Burkholderia gladioli       | NC_015381_25716  | ctgtgctgggatgagaatgctgttctcccXgtttctacagccatgctgattcgttcgg     |
| Burkholderia gladioli       | NC_015381_33596  | ctctctgatc gatgtagtacaggcagctXtgcctctgctgtttgatcatgattcaagc    |
| Burkholderia gladioli       | NC_015381_44297  | ctgctggtcgtcgtatgatcgtgggtctXtgcctccgcttaacacactctacgatcagc    |
| Burkholderia gladioli       | NC_015381_52418  | cgcaagatttcattcgaagactgccaccgaXaagcatgccgatgtgttgctaacgactgg   |
| Burkholderia gladioli       | NC_015381_54365  | gtctatggcggctgctgcacaaactcagXagaaacgtctgcgaagctttcggcaagtc     |
| Burkholderia gladioli       | NC_015381_54805  | cgtgccagattcctaccggaagcattggcXctattgagtgacatcaagttcagttgtg     |
| Burkholderia gladioli       | NC_015381_57762  | gatgctcgagtgctggcgattatacttccXtccattgtctcgaactgtatcgtaggctc    |
| Burkholderia gladioli       | NC_015381_80592  | gcgacacgcatggttctctgcaaggtgXggtctatactgaaacttattgcgtcttc       |
| Burkholderia gladioli       | NC_015381_94373  | ccatacaggaaggctgaatccgtgaccgaXgtcgcgaactgttccggttaacataccg     |
| Butyrivibrio fibrisolvens   | NC_021031_37896  | ctactgagctggctgccttaccaggctgXgcttggtagtagcccacataaagtgttc      |
| Butyrivibrio fibrisolvens   | NC_021031_43426  | gccttgtgatattgaagccgcttacagtaXtatgtcgcaggtggagcccatgtgtagcg    |
| Butyrivibrio fibrisolvens   | NC_021031_50306  | cctgtcgttgatggagtaagccatgtgtXgagtgcaagtagcagactgaggaaagctg     |
| Butyrivibrio fibrisolvens   | NC_021031_52319  | gatacagctctccttctgacaagtcgtaXgctggttccagacaatgtctatctacaag     |
| Butyrivibrio fibrisolvens   | NC_021031_54797  | ctgtagttggtatccacgtaactctatgXcggctactgtgctcactgtcagcttacc      |
| Butyrivibrio fibrisolvens   | NC_021031_72715  | gctgcaagacagtcgctgtaactctcttcaXtcacctcaccactctggatatacttctg    |
| Butyrivibrio fibrisolvens   | NC_021031_89927  | ctcaggctagtgaacttatgggcaccatgaXaaagtagagaggaagcaggttctactcgcg  |
| Butyrivibrio fibrisolvens   | NC_021031_95535  | ctccatccaatcaagttccacatactgXgattcctgctgctatgcttactactcgcg      |
| Butyrivibrio fibrisolvens   | NC_021031_96537  | gctactgtatgctgctgcaacttggttatXttacctgctgctacggtagaaagctcagg    |
| Butyrivibrio fibrisolvens   | NC_021031_96822  | cgtgtcacgctcccgttcaatcaatcaaggXcattcattcctgctgattattaccggag    |
| Campylobacter jejuni        | NC_009707_17143  | gatcgcgttggccctgttcgcaaaataaaXgcaatacagcttacaagtgccaagaagc     |
| Campylobacter jejuni        | NC_009707_34262  | ggcgtttatgttcgctttaaatacgccgcXtccgcaaaagttgattgtagactactatc    |
| Campylobacter jejuni        | NC_009707_34263  | ctttccacagtgagcgtggcattgtcaaXggcgtttatgttcgctttaaatacgccgc     |
| Campylobacter jejuni        | NC_009707_40868  | cctcagcctcacccttagcacttgcacccaXctgtttgcttaggccaagctttaaataac   |
| Campylobacter jejuni        | NC_009707_60533  | ctatagcaacgctatacttgaaccaaagXcaccgccacgacctgcaagcttggcaaac     |
| Capnocytophaga ochracea     | NC_013162_20470  | cgtcttataatgtactcggcggaattagXgattgtattagcttccgaaccggttagc      |
| Capnocytophaga ochracea     | NC_013162_26002  | gaggtggagcggaggttaagataaaggttagXggtattagggtgaaagacaaggttgcgcg  |

|                         |                  |                                                                  |
|-------------------------|------------------|------------------------------------------------------------------|
| Capnocytophaga ochracea | NC_013162_34736  | cgtgttatgacaatgaccgcataggcatacXcccacgaggaagtgcgcaactatcaaa       |
| Capnocytophaga ochracea | NC_013162_38118  | ccaccgaccgctcctgccaatgttaccactaXctctaccggcgataaggtaataagtaacag   |
| Capnocytophaga ochracea | NC_013162_39     | gagcaagaggttcctacctacaacaatgaXgggacataggtctgttacgacgttgg         |
| Capnocytophaga ochracea | NC_013162_54505  | caaatagatgttcgggagaggtgtagccttXttaacaacctccagccgagccacctcgg      |
| Capnocytophaga ochracea | NC_013162_60352  | cggtaccatatactacaataaccgcccXacctgtctgtgcaaatcgtgccattc           |
| Capnocytophaga ochracea | NC_013162_6653   | gacgctgtacgaccagcgctacaccgttXtgcaaacagtagaacttatcatatgaacg       |
| Capnocytophaga ochracea | NC_013162_66676  | ggtaactcctcctgtttgtaagcacttctXtgcaaacgcgctgttccaattgtgagc        |
| Capnocytophaga ochracea | NC_013162_71600  | cgcgctccaacgggtgtataactaagttacXggcgcaattcttctcctcagtagcggtag     |
| Carnobacterium sp.      | NC_015391_14703  | caagtcatctggtacgtcgttgggtgcagttXgggaaactctggaactcgggtctacattgatg |
| Carnobacterium sp.      | NC_015391_1721   | gccttagcttagtctagtattacgatgggXgcttccagtaggacattcattgggattctc     |
| Carnobacterium sp.      | NC_015391_39079  | gcttaacggccttaacgggtgtagtatagXctgtcatagagctacgttgcgtacaccg       |
| Carnobacterium sp.      | NC_015391_41009  | gatagaggtgtagatgtccctatcgttaXggatttaccaatctgtgttcaggacac         |
| Carnobacterium sp.      | NC_015391_42268  | ccttctcataggaacttggctggagcagXgcttcatccttaattgcaaccgccattg        |
| Carnobacterium sp.      | NC_015391_67328  | cgatgaccaagtccgtttagagttatggXcaaggttcgataacaaccgctcacttgcac      |
| Carnobacterium sp.      | NC_015391_69735  | cttccatcagaccgtctaaagcgggtaaXgacttgcgaatgatctagtgtgcgattctg      |
| Carnobacterium sp.      | NC_015391_70478  | cacaagtggtacacatgtgccattgttctXcggttcaacaactaactctcgaccaatcgc     |
| Carnobacterium sp.      | NC_015391_74699  | gagataccaccaaatgtaagaccaaccXagaactatccggctgaaccgagttatcgc        |
| Carnobacterium sp.      | NC_015391_81899  | gcagggtccgtgatacatagaagccacgctXagcatcatagcctctgtgtagactaatc      |
| Carnobacterium sp.      | NC_015391_87100  | cgcagccgtgattcagctattgggtggctXtgctcctgttgcgttccaattattgg         |
| Caulobacter crescentus  | NC_002696_111096 | cgtgtctgttctcaacgaggtttcgaaggXctcgaagcagaatcacggaatacacgcg       |
| Caulobacter crescentus  | NC_002696_116914 | cctgtagtaattctcgaagttcaagaactXcgtgagccctctgccgataaacgcgctgg      |
| Caulobacter crescentus  | NC_002696_131504 | ggccttaattctgatacggagggcgtcgtgXctcagcgttcaagcgtaaagcgaatgac      |
| Caulobacter crescentus  | NC_002696_25515  | cggagggctcgtgaaggcttctgatcgcXgtgctcgaagtataatcaggttgaag          |
| Caulobacter crescentus  | NC_002696_48881  | ccgcgctgtgatcatttccagctcaggtXctagaatcgacctctacgttctcctc          |
| Caulobacter crescentus  | NC_002696_73198  | gatgctgcgacgaatagctcagctctgXaatgttggctcttggctccaaggtgtc          |
| Caulobacter crescentus  | NC_002696_9651   | ctggctactctgacgtcaggattctagXaccctcaacgaagcggctcaaatccacctc       |
| Cellulomonas fimi       | NC_015514_103138 | gaagcagatgagcaaccgacacagaaacaXccgtaaatgtctacatggcaccaccacc       |
| Cellulomonas fimi       | NC_015514_134921 | gtattgccctaggcaagttcatcagaactXgaaacgcttaccgcttgaccgatgtgtcc      |
| Cellulomonas fimi       | NC_015514_1495   | cacttatctgaccaaagggccgcatcXacctatgcaaggtgatgtaacgctg             |
| Cellulomonas fimi       | NC_015514_1575   | cggttgtcaaatgatgtgcgacgcttggXagaataccagcctcgtgttacccaagc         |
| Cellulomonas fimi       | NC_015514_1577   | caaagaagacctcgcggatccttctcgaXaagcgggaaactcggcatcttctggatg        |
| Cellulophaga algicola   | NC_014934_106868 | ctttattctagcagctacacaagccaattXtgggttatcctcctgagactcgggtgc        |
| Cellulophaga algicola   | NC_014934_114601 | gtggattgtctcgttctatcggtaggtXctgattgtgggagtattagctccttgtc         |
| Cellulophaga algicola   | NC_014934_125404 | ggagtaggactaacgtaacaagaataagtcXacgtcctttaggtgacgatagctgtgtg      |
| Cellulophaga algicola   | NC_014934_134554 | gcttcaaggcttgggtggcagttctttaXagtctgggtcaactgttctacgtgttacc       |
| Cellulophaga algicola   | NC_014934_143274 | gacgcccacaggacctcaggacaagttactXttacatcatcagtgattctgttaactg       |
| Cellulophaga algicola   | NC_014934_145981 | cgatttgaaggtacatattagttgccagaXcatagctcgaatccgcccaacgaggtgc       |
| Cellulophaga algicola   | NC_014934_25525  | ctaaactgtatgatattgggaatagcgXicatgtcctggatccttctggccaagccg        |
| Cellulophaga algicola   | NC_014934_50461  | ggtcggcgtctgttacctgtgaccataacXtatcagaacacctgcaatttggcctcctg      |
| Cellulophaga algicola   | NC_014934_71226  | gggagcggcacttgcaggcttagcaatagcXataatctcctgtgtccaatctgcccaac      |



|                           |                  |                                                                |
|---------------------------|------------------|----------------------------------------------------------------|
| Cellulophaga algicola     | NC_014934_82994  | cgaataagaaggtgcgtggttccgtgtctXcctaaagaggaacaatatgggcagacatcg   |
| Cellvibrio japonicus      | NC_010995_108252 | gtttcgtcccacaggaacagatcaccgctgXtctttgtatcaccgttccagggtcagg     |
| Cellvibrio japonicus      | NC_010995_116480 | gaataatcatcgatcttctggacggtgacXgggcacaccggtaatatcgctaccggagcg   |
| Cellvibrio japonicus      | NC_010995_132401 | gtgcacccgtggattgctcaggtgatcaXccacacctgcagcaataattcgggcaatgg    |
| Cellvibrio japonicus      | NC_010995_141024 | cggaggtaaaagtgtctccgagattgtcccXtccacctctgtggatacaggcaaacatc    |
| Cellvibrio japonicus      | NC_010995_152298 | gtctccggaacaagcctttcatggccagXgccaatcttccggcgataggactaatc       |
| Cellvibrio japonicus      | NC_010995_22673  | gttctatctaccggttaaaagcactgctggXatataaaagcgtggtggtggtgagcctgcc  |
| Cellvibrio japonicus      | NC_010995_49309  | gtttcagcagcggtagcgggtgagtcgatacXtggccagattccctacaggattaccgc    |
| Cellvibrio japonicus      | NC_010995_57898  | gtttgtagctgtctgtgctcactattXgtttccctctcaacggatgtagtactc         |
| Cellvibrio japonicus      | NC_010995_72410  | ggtggataactgcctaccggtgacgtgtatXccatgcatatacaaacgccaaactgttc    |
| Cellvibrio japonicus      | NC_010995_86026  | gaaatcggagagatagatgtatcagggttXcaatttactcgcctggtgatctggcgc      |
| Cellvibrio japonicus      | NC_010995_99671  | gtctgaatgtctcteggtacagccctgtXtgcaacaatcaccgctacacacggcc        |
| Chitinophaga pinensis     | NC_013132_108    | caccactgtactcgtacctctttacagtXcttcagcgtagaagataacagcgggtgccg    |
| Chitinophaga pinensis     | NC_013132_137954 | gctgtgtttagtcgatgcaggaaatgcttXaggagacaatgtttcaaaaggtgcaccacc   |
| Chitinophaga pinensis     | NC_013132_164125 | ctgctgttaccggtagactatctaccagcXgcggtctttatcagcaaaaagtaaaagac    |
| Chitinophaga pinensis     | NC_013132_17101  | cagtaatagcatcattgcggcaggagcagtXctcaattgtgatgataatgcacattgg     |
| Chitinophaga pinensis     | NC_013132_194986 | ctgtaacattctgaacaatcagtaaggtXaccgggtatcatcagggcgcctccgatacc    |
| Chitinophaga pinensis     | NC_013132_222764 | ggcggtagctgttggcggattgtttggcggXcggcgatattctgatagctctttgtatc    |
| Chitinophaga pinensis     | NC_013132_270882 | catcggttacattactcttcttagcaaXctgccagactgatagccaagtgccgatcag     |
| Chitinophaga pinensis     | NC_013132_304125 | ggcgtaccataaaagtattgagtcattgXtactggtagcagggtctttctctcagg       |
| Chitinophaga pinensis     | NC_013132_33640  | ggatgctgctgttactctcacttatggaXttacacaggcaatactgcaccagggcgtag    |
| Chitinophaga pinensis     | NC_013132_51286  | ggaaggagatgaatgggtactcaatggtacXtgccatgaatatgaaatgcgtgacacgag   |
| Chitinophaga pinensis     | NC_013132_70741  | ctgaccaagcagcacttaataacatacXtgcctccagccggtctgcgccataacgcc      |
| Chitinophaga pinensis     | NC_013132_87828  | ggcgtcgtgttggcggttgttcatcttaXtccaacaatagatgatgctgcaagatcg      |
| Chlamydomphila abortus    | NC_004552_129    | ccgaggtggactggcaccgttgggtggcaagXtcaaggatgagctgtagattggttattc   |
| Chlamydomphila abortus    | NC_004552_15722  | cgttgtgggtaatgtccgaaaggattccaXatggcgtgctgtgctcgttgtgattagc     |
| Chlamydomphila abortus    | NC_004552_18542  | ctgggaatagtcattaatcaagcgttagXcgcgcttagtctgcaatgcgagccttcc      |
| Chlamydomphila abortus    | NC_004552_24230  | cgataactgtgggatgaccgttaattgtcccXcttaattgtgcttagcagctactctgatag |
| Chlamydomphila abortus    | NC_004552_26682  | ctccgtcgaagtctcactctacgagetaXcctcctctatactggacgggttccgctcc     |
| Chlamydomphila abortus    | NC_004552_29948  | gttgtcgcgatcagcttccctactgtggaXtacgtactactgattccagtgaaattcgtg   |
| Chlamydomphila abortus    | NC_004552_37859  | cagtcgccctgttctcaactgtcagagXtagctccggcctcaataactgtgtagacg      |
| Chlamydomphila abortus    | NC_004552_38111  | cacggaatttccagccaagctgttaactXctccggttgttagacgggtgtgcttctc      |
| Chlamydomphila abortus    | NC_004552_6167   | gatgctactttagcaattgttctgcaagXagctccctcatccatgctctgggttcc       |
| Chlamydomphila abortus    | NC_004552_843    | gctgtgacaatctcagaggtgtattcttgXctattcaacctgcgctagctccattgcc     |
| Chlamydomphila abortus    | NC_004552_9193   | gtcgtgctttagccttagcaatatagtgXctgattgggatgattgcggtactcgtccc     |
| Chlamydomphila pneumoniae | NC_000922_10172  | ctggaggcacttctgatgataaaattccXcaggaagggtaaatccatgcagcagtatag    |
| Chlamydomphila pneumoniae | NC_000922_15793  | ggcctcagcttattgcaggagtgctgttaXcaaacctggtacatcgtttctttatcctg    |
| Chlamydomphila pneumoniae | NC_000922_20763  | gtagatgccaccctactgtcgattctagcXgatctgacctcaagtctaactctgcatcg    |
| Chlamydomphila pneumoniae | NC_000922_25565  | cattaaggaatccaagggagaggtctgctXgattcgtcctcactgctattctaaactac    |
| Chlamydomphila pneumoniae | NC_000922_29895  | cttctcatcctgagaaggaacgtcttccXcatgggtattaccggcgtctattctaaagg    |

|                                  |                  |                                                               |
|----------------------------------|------------------|---------------------------------------------------------------|
| <i>Chlamydomydia pneumoniae</i>  | NC_000922_3765   | ggaatcaagagattgtgagtaggcgtaccXttatctctatcgcgttgcttatgtagcg    |
| <i>Chlorobium limicola</i>       | NC_010803_25358  | cgggcgaaacctctgcaatgaccggcgttgXattgtttcaggctgtttgggtattccagc  |
| <i>Chlorobium limicola</i>       | NC_010803_30150  | ggatgcgtacatggaaatggacaccacaagXgggattgcgaacgttacttgatgaatgc   |
| <i>Chlorobium limicola</i>       | NC_010803_36443  | gtcttatgtgaaagcttcggatgatctcaXccgattacaacgtatttctccaagcgtcg   |
| <i>Chlorobium limicola</i>       | NC_010803_5211   | ggcaggcatctggaagtcgtcagaagaattXgtttggtatagcttctctgccggactgac  |
| <i>Chromobacterium violaceum</i> | NC_005085_110456 | catgccttctaaagagtggttcgattgaaXctcaagggtactttgccgatcacttgctgc  |
| <i>Chromobacterium violaceum</i> | NC_005085_285    | gtctggaactatcggcacttcgatgttgagXcttgtaagcctaagctggtgaaatcgcc   |
| <i>Chromobacterium violaceum</i> | NC_005085_33183  | cggtcttggctgaaagcggcctattctacXgcaattggactagctggacataagctgag   |
| <i>Chromobacterium violaceum</i> | NC_005085_43348  | cccaagtgaaaccggaaagcgacaaaactXttcagctcgtgatgaagccgatcatttg    |
| <i>Chromobacterium violaceum</i> | NC_005085_47859  | ctgagatgccaaagtgcaatataaagaaXtggcttggcgcggatgttcattactctgg    |
| <i>Chromobacterium violaceum</i> | NC_005085_55213  | ccagcctctggccgcatggaataatgctggXcctgatgagcatgaccgaatgatcaacttg |
| <i>Chromobacterium violaceum</i> | NC_005085_66076  | catgtctgaacgtgaagttagggttggccXtatcaatttctctgtctggcggagtggag   |
| <i>Chromobacterium violaceum</i> | NC_005085_76429  | cctggccaaatcgcttggcgaatggcgatXtgatgttctcaagtcgctcattcagatg    |
| <i>Chromobacterium violaceum</i> | NC_005085_87482  | gcattccacatgattgctggttggaaatcXggaatcgccctaggcagttctccctcc     |
| <i>Chromobacterium violaceum</i> | NC_005085_93227  | gattatccatgtaagtcttcagtaagcgtXcttggtagactctgacaccgatcagctg    |
| <i>Chromobacterium violaceum</i> | NC_005085_97533  | cgcatattccgctcgttaccttctctcXgctcaatagattggcgcgttctccaatgc     |
| <i>Clavibacter michiganensis</i> | NC_009480_107513 | gacatgttatgcggttcatccggttcgctXgagagttccgatttcttccaagcc        |
| <i>Clavibacter michiganensis</i> | NC_009480_1441   | gagcgtcttctagtccgttctgtctcattXccgattgatctactgatcagacccaatg    |
| <i>Clavibacter michiganensis</i> | NC_009480_63327  | gttccaggctctgatcgcgccgctgtgtXgtcattgcccttgatgttactgactgaac    |
| <i>Clavibacter michiganensis</i> | NC_009480_6471   | ggaatagagccagctctcagaatctatgtaXccgttctagtacggcagatctcgggatg   |
| <i>Clavibacter michiganensis</i> | NC_009480_86326  | gtcatattgcgctgcgctcgtgtccaatXgcttccagaaaggaaacctcgacttctc     |
| <i>Clavibacter michiganensis</i> | NC_009480_86526  | gcttgtgatccatgctgcacagcaagattaXccgaataccttgaccgctgactgtcaacgc |
| <i>Clostridium botulinum</i>     | NC_010520_129925 | cctaaagcaataatccaaggaactaggtXatgggatgatcgggtgatgtgttggggc     |
| <i>Clostridium botulinum</i>     | NC_010520_14363  | gcaagagctatgacaccataacgtttgggXcctatgcctgatgatctatagctttg      |
| <i>Clostridium botulinum</i>     | NC_010520_29663  | ctgtgaaatcaatttagtggaactcctXggccagattctagagacgttctgtctctg     |
| <i>Clostridium botulinum</i>     | NC_010520_33554  | gtatacatccggacataagtagattgcataXtggcaccagctccgtctttagctgtg     |
| <i>Clostridium botulinum</i>     | NC_010520_34605  | cactgagaaagcctcgtagctgtgtccaccXactaacgtcattacgatcccgcacaaag   |
| <i>Clostridium botulinum</i>     | NC_010520_34606  | ggagcgtatagaatgggtatattccaataXcactgagaaagcctcgtagctgtgtccacc  |
| <i>Clostridium botulinum</i>     | NC_010520_77210  | gacttaatacggcggctcattcaagcttggXggcccgagttactccaatctgtatcctg   |
| <i>Clostridium botulinum</i>     | NC_010520_77307  | cttatgacaatttctgctcggcctgtgattXggcgtcattgatagcgaatattctcccgc  |
| <i>Clostridium botulinum</i>     | NC_010520_8703   | catgtagcaggtgttatgcatcaagcgcXggagctattgcaggtataggtggagctacc   |
| <i>Clostridium perfringens</i>   | NC_008261_106636 | ccatagaagctgcattaacagggtgcacctgXctcaagtaagatgtagtcttagcatgc   |
| <i>Clostridium perfringens</i>   | NC_008261_65477  | ctggcattactatacctgtaggcattgcagXtatgagcttctgctcaattatgccagccg  |
| <i>Clostridium perfringens</i>   | NC_008261_85799  | ggctcttagcacatcttctactttagcgttXcattgaaggctcctaaagctactgcatc   |
| <i>Clostridium tetani</i>        | NC_004557_34196  | gagttcgactgttgatgcagtagaacgttXtcaactggttagcagaacatggcggcgcg   |
| <i>Clostridium tetani</i>        | NC_004557_36164  | gtattcaagagggtgtagaacccggacaaaXctgcatgtccttggaaactgttctcag    |
| <i>Clostridium tetani</i>        | NC_004557_51778  | catagccatgactagctgctgcccttataXccggtttaggaagtctccttgcaaaagtc   |
| <i>Clostridium tetani</i>        | NC_004557_80056  | ctctcaataactcctgctggtgctaataacXtctgtcccactttgtaccctgcatatagg  |
| <i>Clostridium tetani</i>        | NC_004557_92869  | ctcatccaataggtcactttgaattgttagXaagccgctcctgatattgccagcctgtg   |
| <i>Collimonas fungivorans</i>    | NC_015856_124139 | ggctctgatcgtttagtgcgattcgtaggXggacctgatattgcttccgctcgcacccg   |

|                            |                    |                                                             |
|----------------------------|--------------------|-------------------------------------------------------------|
| Collimonas fungivorans     | NC_015856_131225   | cgtagaaatgttccagcgggtatcggggatXacagatcaagccagctgttccctacgac |
| Collimonas fungivorans     | NC_015856_143145   | caacctccgcgggtctgggagaacctattXagcagctcgcgatgatggaacaacaactc |
| Collimonas fungivorans     | NC_015856_152362   | ctggaattgcttgcagctggttaataatXgcatagtcggcgcacgttgtagatccggcg |
| Collimonas fungivorans     | NC_015856_197      | ctgftaatcgaagtcaactcctgctcgaTxcagccattgacgatagcaaacatcgc    |
| Collimonas fungivorans     | NC_015856_21570    | ctatcgcacccgtcaaggtgaacgtaaattXctaccgacctgaaccgcctgtggaagc  |
| Collimonas fungivorans     | NC_015856_47934    | ggcgcaccagagtgaccgagaagagtgaXctacactgacgatcactatcaaacattcag |
| Collimonas fungivorans     | NC_015856_58284    | gcaacagtataagccatcctattggcttXctatttgataagggcgaatcgcgtgac    |
| Collimonas fungivorans     | NC_015856_9152     | ctcggacgcaaggtatattgctcctgagcXtcaatgggacgttcatcgaagcgagag   |
| Comamonas testosteroni     | NC_013446_111528   | ccagcatgctcaacgccttgcctgattggtXtctatccctccatccataacgaatac   |
| Comamonas testosteroni     | NC_013446_122494   | gatgtgagcaagacatgggcaattgtatXgaccagatcagccgacgaagccagcattc  |
| Comamonas testosteroni     | NC_013446_144708   | ggtaaagacagaagattgatcccatgatcXgccgaagaagatagcgggtgcacatgctc |
| Comamonas testosteroni     | NC_013446_151016   | cctgacagctgctccaacgactcagcttXgttcaagatgatgctgcacacgttattg   |
| Comamonas testosteroni     | NC_013446_163717   | gccgtgccctttgcaattccagcacttcXcgcagaagggccatgaatacagatattg   |
| Comamonas testosteroni     | NC_013446_55148    | gccgggactgctttctggcaatacacctatXtggcaactgtgtcctgaccgatgttac  |
| Comamonas testosteroni     | NC_013446_740      | gcaggcgtattttatcccttcaagcctcXcaagcgtatggaattcaccgatacgcag   |
| Comamonas testosteroni     | NC_013446_78155    | cactccagcaaccagactcgttcatctctXcctgactgcatctcaaacattgtcatg   |
| Comamonas testosteroni     | NC_013446_92440    | gccttggcagcaacatttctcgtaccXaattgctgatggatctctactagatcgc     |
| Comamonas testosteroni     | NC_013446_96123    | ggcataaacctcgttacagagatgaagtgXctggacttgaccaactcaccactcagcag |
| Comamonas testosteroni     | NC_013446_99994    | cgtagcgtatgatccgtctgtagtctgtXatagtgtagatagcgcgagctcgttgg    |
| Competibacteraceae CPB_P15 | C21_contig_225_41  | gtttctccagcggcggcgttcttctgXgtgctggtcagttctccattgacgaagcg    |
| Competibacteraceae CPB_P15 | C21_contig_233_116 | gtagataatcaaatccatactcgttggXttgtctcaagcccaaacgcatgttctgc    |
| Competibacteraceae CPB_P15 | C21_contig_233_94  | gaacgacgatcactccaggtgtaaatctXgatccttgcggatcagcgaagtggtgg    |
| Competibacteraceae CPB_P15 | C21_contig_247_170 | cagtaggacggatcgtgaggttctgaXtgcggtagtgacggtaatgattgcccgg     |
| Competibacteraceae CPB_P15 | C21_contig_247_72  | cgatccgaggtatcgaatcagtgagaccXcttccagggcagcgggtcgaagtaaac    |
| Competibacteraceae CPB_P15 | C21_contig_31_27   | gaatactccagcaccatagcctcatgaccXgctaattcaatcagcgaatgccgccg    |
| Competibacteraceae CPB_P15 | C21_contig_31_86   | gcttcagatcgtcctcagcgcatacaXtattctcagacgtgtgataggccagcagcc   |
| Competibacteraceae CPB_P15 | C21_contig_314_43  | gcaacggcaacagcccagatggcattcXtgatttcaagcgaatagggaagagctgc    |
| Competibacteraceae CPB_P15 | C21_contig_322_14  | gggtgcagtagcggcattaatctcgttattXctgtttcaagcgaagccttcttacc    |
| Competibacteraceae CPB_P15 | C21_contig_360_12  | ctggactgaggatgtattggtggacatcaXgggaaggaacaatgattgacaccgttgg  |
| Competibacteraceae CPB_P15 | C21_contig_368_101 | gcgactaccctgattgacaccgggtcgcXatcgaagaagcggatcattaactattatc  |
| Competibacteraceae CPB_P15 | C21_contig_534_47  | ggcgcaggtataacaaccgagtgctatcXcagatgacgcagataagcgcgactgtaag  |
| Competibacteraceae CPB_P15 | C21_contig_545_95  | gcgaatccgccgttaattggtatggtgXactctgtttggccgctgcgattctgcatg   |
| Competibacteraceae CPB_P15 | C21_contig_560_11  | ggcatcagagaacacattcgcgctaagtgXactgcataggaaccaaccagcaacgatg  |
| Competibacteraceae CPB_P15 | C21_contig_560_12  | gtcaaacgccatcgcagtaataacgccXgccatcagagaacacattcgcgctaagtg   |
| Competibacteraceae CPB_P15 | C21_contig_597_11  | ccgcaaatggcgaacctcattggaatcXcctcaccacaaagccagactcctgac      |
| Competibacteraceae CPB_P15 | C21_contig_732_10  | cttgggaatggcctcgttggcactctgXgattcgggtcaatctgataaatcttccac   |
| Competibacteraceae CPB_P15 | C21_contig_777_10  | gcttccattttgaaagcgacatcaccXatcgtattcgtgacttggtgtcatccgc     |
| Competibacteraceae CPB_P15 | C21_contig_839_32  | ggccagatggtcggcgtgcaagctgattXtgcctgatcgtggtgattctgactgac    |
| Competibacteraceae CPB_P15 | C21_contig_858_56  | ggccagcgcctcaatcaggtatccacXaatagtaacgctgattcagtgcaataacc    |
| Competibacteraceae CPB_P15 | C25_contig_1058_28 | gtcaatgcacaacgcacaggaatgactgXcttctgttctccatcaccagtcacagcc   |

|                              |                    |                                                                     |
|------------------------------|--------------------|---------------------------------------------------------------------|
| Competibacteraceae CPB_P15   | C25_contig_1091_30 | ctatatacactgactgatcgtggaatccttctgctgXtggacctggtacaccggatcagcgggttgg |
|                              | 8                  |                                                                     |
| Competibacteraceae CPB_P15   | C25_contig_1096_38 | gtcaacatcttcggcgccattgtccgctgcXtctctcctccaaggcctcaaaagcattctg       |
| Competibacteraceae CPB_P15   | C25_contig_1398_37 | gccccaaagtattcgttcaaggccgctggtXcctggtaaaccaccatgcaggaaagtccac       |
| Competibacteraceae CPB_P15   | C25_contig_1487_62 | cttcggccaccgggtctacaagaactftgaXagccaaggactcctcaaatgctgctgatggg      |
| Competibacteraceae CPB_P15   | C25_contig_1529_11 | cactgcttttaggtcgtattgccggtgtXgccgatgctgatcacatcagcgtcgttgc          |
|                              | 0                  |                                                                     |
| Competibacteraceae CPB_P15   | C25_contig_1634_10 | caggctgcgaataaccggttcacatcaacXatagccctcgtctccagaatgtccttcac         |
|                              | 8                  |                                                                     |
| Competibacteraceae CPB_P15   | C25_contig_1634_10 | gaccagaatgtaaggccactcatcgggccXcaggtcgcgaataaccggttcacatcaac         |
|                              | 9                  |                                                                     |
| Competibacteraceae CPB_P15   | C25_contig_1634_12 | gcctgcacctgttgaatgatggtgtgggtgXcattgaaggcgtcgaccattctcctcagc        |
|                              | 9                  |                                                                     |
| Competibacteraceae CPB_P15   | C25_contig_1634_81 | gcctgtcgcgatttcatgctccagatcgcgXgagttgatagatacaatcctcgcggaaacg       |
| Competibacteraceae CPB_P15   | C25_contig_1646_84 | gaagcgatgctgatcacttctgctcaatXcggctggaaggtaaggagatattgttcag          |
| Competibacteraceae CPB_P15   | C25_contig_1685_41 | cgcaagatcgaagcattcagatggacaccXgagaccgccaagccaccgaagaattggg          |
| Competibacteraceae CPB_P15   | C25_contig_260_17  | ggcctttggcgaagtttcatccggtttaXcgagatgcatcatgcccgtcagcggcgtaac        |
| Competibacteraceae CPB_P15   | C95_contig_168_70  | ccgctgtccgacaatgtcaagccgtcgggtgXcagattcctcaagccaccatgcggaaagtg      |
| Competibacteraceae CPB_P15   | C95_contig_206_45  | gcatcgaaggccatttacggatcgttgcgXtggcccgaatcaccattgatccattacc          |
| Competibacteraceae CPB_P15   | C95_contig_206_55  | cggcgtcggactgggttagacatcgtcggXacgatcacattgtcatttctaccaactgg         |
| Competibacteraceae CPB_P15   | C95_contig_277_8   | catattggcaacgaataatgcacaatttcXgaatgtcgaagtcgccaccgcgccgg            |
| Competibacteraceae CPB_P15   | C95_contig_61_38   | caagcgtcgttgcggtcgattgaacagXaagcctgtctgggctggattgaataagg            |
| Competibacteraceae CPB_P15   | C95_contig_7_38    | cattcacaccaaacagggttaataatcaXgtcactcaatgaagccctgctccaccgg           |
| Competibacteraceae CPB_P15   | C95_contig_84_10   | cgttttactgcccgtagcgcgatcacataXatgcgccaatggcggttcataaagccac          |
| Competibacteraceae CPB_P15   | C95_contig_84_49   | gtagcagataccagcagtggtgcacattcagXgcccagttgatcccaaggtttgcattcc        |
| Competibacteraceae CPB_P15   | C95_contig_9_56    | ctagtcaggctcgaagcattctgatgcagaXtctgatcatctcgtgctcaacgtctcc          |
| Conexibacter woesei          | NC_013739_111744   | cgatctcgttgcacggcggatgagatagcXaataattgtctcaattggcgcacgcaagtg        |
| Conexibacter woesei          | NC_013739_139779   | cctcctatcgttaagtttgttaattgggtgXtctcctcgttggcggatcgcggtgtcaagg       |
| Conexibacter woesei          | NC_013739_146487   | gctcatgtgagcaacaccacctctgctcXacatctcaactgcatctcgtctcctctgc          |
| Conexibacter woesei          | NC_013739_199036   | gtcgcactccaatctcagtttctcggggaXtgtgtgtagattgttccatgcgcgtacc          |
| Conexibacter woesei          | NC_013739_211189   | ggcagcggccgatcctgtgatcaagccatgXacatacggaaatcactcaagtaactgcc         |
| Conexibacter woesei          | NC_013739_31259    | catctgtgaagacgtgttcatacgtatagaXcggagggaagcggcagcgggaaggtgtac        |
| Conexibacter woesei          | NC_013739_37487    | ctctcacaatgtatgtgacgctcgttacaXtgcctcctccctgctgcaatgtaattggc         |
| Conexibacter woesei          | NC_013739_43630    | cattcatcaagccgaatccgcccgttgacaXtagtcaaggcggatctgccgtcagattgtc       |
| Conexibacter woesei          | NC_013739_48814    | cacgaacgtctgtcgtcgttcaaatctXcaaaagccctcagagcagcgaatcagccg           |
| Conexibacter woesei          | NC_013739_52       | gtatccatcgtgaagatctcggccgcgcgXgcctatgacgaagaactttctatctcag          |
| Conexibacter woesei          | NC_013739_69912    | gtagtgaactcgtcgtcgtttgagcgttgXtctgatttctccagcagtcataactgtg          |
| Conexibacter woesei          | NC_013739_70767    | cactcacctatcgcaggtttgcagaaagaaXttctgatgatcccgtcgtcagagttgc          |
| Coraliomargarita akajimensis | NC_014008_102970   | gaaacgagtgggcgttattatggttggctgXgtatcctatgtaattgggagagacgaaac        |
| Coraliomargarita akajimensis | NC_014008_110016   | gcgaatgtctgctgtgacggtttgctgcgXcgtttgaatcgtgaatgaacgttaattggc        |
| Coraliomargarita akajimensis | NC_014008_17625    | cgagaactcagtcctcctaagctggcgtgXgtgtcagaattcgtggaagtactgacatg         |
| Coraliomargarita akajimensis | NC_014008_22742    | ccagcattctctctgctgtgcaaatXggcgtggaggtatgtagccgaggcattc              |
| Coraliomargarita akajimensis | NC_014008_27531    | gatgcacgtaaggcgtctcccaataccaacXaatggcaactagtggattcagttgcttg         |
| Coraliomargarita akajimensis | NC_014008_38       | gcgaagttccggaagtactaccgcagcgtcXttcattcgcgcgattcaggagaataagttg       |

|                              |                  |                                                               |
|------------------------------|------------------|---------------------------------------------------------------|
| Coraliomargarita akajimensis | NC_014008_41106  | cctccacaactcatagaatcaatcttctXaaagtgccactgaacgctcgcctctgactc   |
| Coraliomargarita akajimensis | NC_014008_47768  | ctacgagtttgaatcgaagcatcctcgaXgattaccatcctcaaatcgccacacacgac   |
| Coraliomargarita akajimensis | NC_014008_55054  | catgtaaccgccacttgaccatcagtggaXagcccagcattcaatgcactcgaatcgc    |
| Coraliomargarita akajimensis | NC_014008_5737   | gatcgtagccgattgctcggtggaattgtXcaccattgtctggagatcgaagggtgg     |
| Coraliomargarita akajimensis | NC_014008_63218  | gcacacatgctgacgaagctctaaacttgcXaggccttggaaatgatgaagtggctattg  |
| Coraliomargarita akajimensis | NC_014008_76164  | gtcactaatgctgaaagtgcacaacaccgcaXttcgacaacgccagaccatcgcacgcatg |
| Coraliomargarita akajimensis | NC_014008_81913  | ggttggcactggttccgcaagtctgtatXcgatatactggttggtagctccggatg      |
| Coraliomargarita akajimensis | NC_014008_95246  | cagctcgtcagcttcaggaatctcggtttXcggctcagtagtttcgaccgttcgacac    |
| Corynebacterium aurimucosum  | NC_012590_19263  | cgtagcagaacagtttccaactggagggaXtatcggcgtagggcgtcaaatctttggctc  |
| Corynebacterium aurimucosum  | NC_012590_26980  | gacagcgtatttgaagcgtaggaggggXtaaatgcatgaatcaacgcaacaatccatc    |
| Corynebacterium aurimucosum  | NC_012590_48440  | gggaggaaatcatctcgaatgacatgggaXcgtctgagctcgaccgccttgttgcattc   |
| Corynebacterium aurimucosum  | NC_012590_507    | cggtgaagtggtattatccctagtgacacXagactttcttagacgctttattgtctgcc   |
| Corynebacterium aurimucosum  | NC_012590_5544   | gtagtccggtatcccaattacctgaacXtacctgacttggcgtggacgcatcagag      |
| Corynebacterium aurimucosum  | NC_012590_58015  | cagctctacaggaagaagaaccgcgcatXatgtcggagagttcaaggccaaggttcg     |
| Corynebacterium aurimucosum  | NC_012590_65599  | ccattcttgagcgtttcacggaaccgcaXactttatgctgacttccggttccatcgcgc   |
| Corynebacterium aurimucosum  | NC_012590_73532  | gatgaggttcttctgatttccaaccggtaXgaacgcttgaattgatagcgaccgtggc    |
| Corynebacterium aurimucosum  | NC_012590_79310  | gaaggactctagtttccctccgacatgcXtggaggcggcaaatcgaatcaaaactcgg    |
| Corynebacterium aurimucosum  | NC_012590_89874  | cccatgagcacactattgtcactcgcacgXacgctgctcacatcctctgtacgatagtg   |
| Corynebacterium aurimucosum  | NC_012590_9366   | gcctgcatcgggacagctatgaactccagXatgttgcagtttgcattctgcgcttag     |
| Corynebacterium glutamicum   | NC_003450_110256 | caggactctatgcaccgttccggtggacXtgggattaataggactatgtacttgttg     |
| Corynebacterium glutamicum   | NC_003450_23141  | cgaagctttaggtgttcccttctgcccXcgcatttgacctgacggaagtgaatcctc     |
| Corynebacterium glutamicum   | NC_003450_31113  | gtgcccacgaatcaggttggcttattXacgttctgcaatgagttatcaattcg         |
| Corynebacterium glutamicum   | NC_003450_37733  | caaatgccggtgcgaagtgaatcgacgagXacagaagtgttgcgatgtagcaccacgc    |
| Corynebacterium glutamicum   | NC_003450_50311  | cgccgtggtgatgtacagcattaatccgtgXggtggcgaaltggcgtcatttattgg     |
| Corynebacterium glutamicum   | NC_003450_55795  | gaagttgtggaaggttcgctccggaatXtctctctctgcccgttgaagacacc         |
| Corynebacterium glutamicum   | NC_003450_67337  | catctgcgagacttaaccacatggactXgtccatgatgtgatgacatgtggcttc       |
| Corynebacterium glutamicum   | NC_003450_80317  | ggaaagtgttcatltaaggccaacgcgggXatcttggttgatattgagatcggcgc      |
| Corynebacterium glutamicum   | NC_003450_91586  | ggtattaccattgaaccaggagcgtgtgXgtttacctgggtcattccggtggaatgctc   |
| Corynebacterium glutamicum   | NC_003450_96463  | ggcaatcgcctcagacttggccaatctgtXgacatattgatcctcgcgccactatcc     |
| Coxiella burnetii            | NC_009727_14920  | gggtccataagcccatctgaagcctgtgaXagttgatgtaggacttgtttcataggtgc   |
| Coxiella burnetii            | NC_009727_22414  | cgcataacgggtatgttcccaatcattcXgtctcttctgtttatggtgctgaggatc     |
| Coxiella burnetii            | NC_009727_29194  | gtctagcgttccactctgttcggtagtttXatattgtaagtaggcgagcagctgtatc    |
| Coxiella burnetii            | NC_009727_34966  | gaccttggattaagcaattgtcgtttggXcaaccaatcctacaccgccccatgacac     |
| Coxiella burnetii            | NC_009727_38995  | ccattcgttggattacgccaactcgaXtccagctggcggcgttacatftaaggcag      |
| Coxiella burnetii            | NC_009727_47561  | gctcggagctttaacggcagggttctactXaatcgcagcattctctcggcactatgc     |
| Coxiella burnetii            | NC_009727_55294  | gattggcgtatctcggcagttatcgaXaacgtctctgcctactggcaccatttc        |
| Coxiella burnetii            | NC_009727_71792  | gtgccactggcgacttacaattgacgcXgattccaactttgatcgttctcctgtg       |
| Coxiella burnetii            | NC_009727_7209   | cacccttgataatgagcgtattggcattXttgaattcacggttgcctcttccagcgg     |
| Cronobacter sakazakii        | NC_009778_100204 | gtcttctcaatcgtcgttcttcttctcXtgcagctttaggattcagttcgttaccg      |
| Cronobacter sakazakii        | NC_009778_127261 | gtcaatggcgtaccetaaaggctatacgtXctggatgataatcaatcgcacgagtcac    |

|                             |                  |                                                                |
|-----------------------------|------------------|----------------------------------------------------------------|
| Cronobacter sakazakii       | NC_009778_2923   | gcgttatgtgattgagtgactaagggtgccXaagcgacgctatttcgcatgctgacagc    |
| Cronobacter sakazakii       | NC_009778_52603  | gttcaagcgtcgaccatacattgctaagXcctgaagcgtgagggcgctcattcgcccc     |
| Cronobacter sakazakii       | NC_009778_61708  | cctcgcccttcgcatattaccgattcaXcgtgataaagcgtgatcgcaacagacgacg     |
| Cupriavidus metallidurans   | NC_007973_1070   | gtcagatgttccgggtcatgtagggccatXattctcaagatgctttctctctgttcag     |
| Cupriavidus metallidurans   | NC_007973_113744 | cgtgaaatcatggattatgctgaccattXacgttagacgaagctccacgaatacagc      |
| Cupriavidus metallidurans   | NC_007973_121027 | ggcgactaacgaatagtgatcgaggcaXaagcttatcgacaaggccttgggcaaac       |
| Cupriavidus metallidurans   | NC_007973_20574  | cgccatagtcggagataaacgttaactgaXgcttcgattgtggacgccagatacaccgg    |
| Cupriavidus metallidurans   | NC_007973_67683  | cctcgtatagagcacaatgctcacattXcctgaccgacgtcattatggcagccaag       |
| Cupriavidus metallidurans   | NC_007973_78818  | ctagtcaagtgtctcgtatggaactgXgcgctttctcatgcatctgcaagaggtg        |
| Cupriavidus metallidurans   | NC_007973_89893  | gcacaagcgatttataccggcagataaaXgtctgtgtctgtaggattcgccgggtac      |
| Cupriavidus metallidurans   | NC_007973_9483   | gatgaacgcacagacgaacccatgccgcaXgcagacggcaatgaaacctataaacgaac    |
| Cyanothecce sp.             | NC_014501_167020 | gttggagcgggttacggcgagacatcaagXtggctctcatctaggcgcctctaaatcc     |
| Cyanothecce sp.             | NC_014501_192368 | ggttgaccgtcaacaggaattgagcgtatgXtcatctccgctttgagagttgcgctgatc   |
| Cyanothecce sp.             | NC_014501_203001 | cgccccaacaactgtaaacctctcgacaXgccaaccattcccgcattattgccaattg     |
| Cyanothecce sp.             | NC_014501_43367  | gtcctgtgtcttactcctgtctgtctgXcataaccaggatcaatcgggaattcataag     |
| Cyanothecce sp.             | NC_014501_69125  | gacacctaagctggaattattgtctcaacXccatagatagtagctccgctgtggacag     |
| Cyanothecce sp.             | NC_014501_78457  | cactgacacactccatctggagcggcttXctatcaccgctcgaattgatgatgtag       |
| Cyanothecce sp.             | NC_014501_89444  | gtaatctatagccgccatcaccgccatgXgttgaacaggttatatcgcccttattccc     |
| Cyanothecce sp.             | NC_014501_97706  | ctgatttcttaccgctcgcacatccacXtagacagaatcattatgccgaaaagcgtg      |
| Cyclobacterium marinum      | NC_015914_105249 | ggtgaacggtaggttcatggtgcagtttaaXaatcattggtagcctttaccatcgcgatc   |
| Cyclobacterium marinum      | NC_015914_115632 | cggaaacagcagcggatggtgcttcttXcctttgatggagaagtgggacgatgaatg      |
| Cyclobacterium marinum      | NC_015914_126355 | ggctcccttggagtaactgtcaacacatXaagttggccaaatctttcaaggaagc        |
| Cyclobacterium marinum      | NC_015914_137564 | ctaccaaggtggtccgtacaatcgttggXtattgaagcctataccgatgtaggaagggc    |
| Cyclobacterium marinum      | NC_015914_170211 | ccggcacagaccgaatgaaagccttacaagXgttcaggcaccgtagagattggtgatc     |
| Cyclobacterium marinum      | NC_015914_191786 | cttacgtttgatcggtaaggtggcctttXactgttagtagccagcagtaagagccatc     |
| Cyclobacterium marinum      | NC_015914_206231 | gtactcctagatcgttcaaggcttaagXcggctagtcggcaatcccatcacatag        |
| Cyclobacterium marinum      | NC_015914_25369  | cactccggctatccagacaggttaagctgaXttctattgattggcataaagagcagtac    |
| Cyclobacterium marinum      | NC_015914_39184  | ctatccactcaagtagacatcgcattgctXgaacaaccgcttgtttgggtaccattcc     |
| Cyclobacterium marinum      | NC_015914_5927   | gattcctccacctgatgatactgtcactXtctgtttcagtgctcttggaaacctgtctg    |
| Cyclobacterium marinum      | NC_015914_60494  | cataagagcatggttgggattagcaattgXaatactccaactctcttcccccgatcc      |
| Cyclobacterium marinum      | NC_015914_82095  | cattccactatgggtatgtgtgctgtaaaXttctctacagctcgggtatggtccacc      |
| Dechloromonas aromatica     | NC_007298_116911 | gtgtctgagccgttttagttactcgttctXctcagcaccagataatggctttggccac     |
| Dechloromonas aromatica     | NC_007298_150017 | cttgttcgcgctcgttcagctgtccagXcgtacaacaagatttcttcttccatccc       |
| Dechloromonas aromatica     | NC_007298_30490  | ggccatcattacagcactggcaatggtggtXgctgaagcgggttaaagaagggttctatccc |
| Dechloromonas aromatica     | NC_007298_48171  | gttgagcaggttcgcttctcttccaaXtaattctgaactcggcaacatgaagcgc        |
| Dechloromonas aromatica     | NC_007298_58668  | gtctcaaccgatagcagcaggttctgaXgctatctgctgtagacatcgtcagtagcg      |
| Dechloromonas aromatica     | NC_007298_62820  | cggaatcgctcgcacattcgtcgtcttctgXttccgctgatacgcataagaatggctg     |
| Dechloromonas aromatica     | NC_007298_78668  | ggcgtgcttattggctgcaatcagacgXccggaagatggtgatattgaacaacgggtc     |
| Dechloromonas aromatica     | NC_007298_97693  | caacgaagggctagaattctttgccctcgaXgcaccgacaataggacatgcatggaagc    |
| Dehalococcoides ethenogenes | NC_002936_1930   | gtagcggcagggatatttcaagctcacatXgtagaactccctcttctgttagttccc      |

|                                         |                  |                                                                |
|-----------------------------------------|------------------|----------------------------------------------------------------|
| Dehalococcoides ethenogenes             | NC_002936_27677  | cgggacatggccgtcagacgtggctatacGxtatgctcgtgctatggagaattcaggatg   |
| Dehalococcoides ethenogenes             | NC_002936_32616  | gaacaatgtccgtgccactgtcattccgaXcggaaatgtaggtaaccagctgacaccgg    |
| Dehalococcoides ethenogenes             | NC_002936_37138  | cagaaatgccggatagggatctgccaatXgtatctgcccttcaggcaggtagccgaac     |
| Dehalococcoides ethenogenes             | NC_002936_44245  | gtggaaatgtatcgtgggatttaagtattaxccgggtacaatacctgaccagtgcagatg   |
| Dehalococcoides ethenogenes             | NC_002936_5134   | ctcaccttggacgggtcagaacgtaataXgatccagattgacctcaaacgtgtaaacgg    |
| Dehalococcoides ethenogenes             | NC_002936_5634   | gttcagaaccgacctgggatttccggccaXatgaatccctgccaatgtattgaccagg     |
| Dehalococcoides ethenogenes             | NC_002936_8407   | ccagtttcttgggtataaagctcaggtgXcccgatcatctttggcgtcacggttgcgg     |
| Dehalococcoides ethenogenes             | NC_002936_8691   | gcgggtggaactgggtataagggtcactgataXataatagaagaatagataccctccctgcc |
| Dehalococcoides ethenogenes             | NC_002936_9153   | ctcaggtgcaatccgctgtgatagcggccaXgttgcggcaggttcttgggtataaag      |
| Dehalococcoides ethenogenes             | NC_002936_9841   | cggtcttgcggctttatcaggttgggtgaXtaccggataggtgtatcggaactactgg     |
| Dehalogenimonas<br>lykanthroporepellens | NC_014314_14500  | cgcgacgctgtgcctcttggaccaggtgXattcttctccactgttattatctcggcac     |
| Dehalogenimonas<br>lykanthroporepellens | NC_014314_18138  | gtcaagaattccacgccgcacgaatgtgcXaacgactaccggttaactcgggtgatgtg    |
| Dehalogenimonas<br>lykanthroporepellens | NC_014314_23682  | ggagcctgcccattccttggttctttaatXccagcaacatcggagcttcttctctc       |
| Dehalogenimonas<br>lykanthroporepellens | NC_014314_2632   | gttaaatcatgtggccaaccgactctgggtXctcatttactagaagggtattcattccc    |
| Dehalogenimonas<br>lykanthroporepellens | NC_014314_40050  | ctgccccatcagttcaacggccattatcXattgacggcagctgcaggagatgatgagc     |
| Dehalogenimonas<br>lykanthroporepellens | NC_014314_42839  | gttctgaggtcggatgcaaatcggacaXctctaatgttgggttgcagtttaggcc        |
| Dehalogenimonas<br>lykanthroporepellens | NC_014314_49523  | ccagccagtagaatccaatacgtgggtgaXctggcgatttctgacatgctgatatctggg   |
| Dehalogenimonas<br>lykanthroporepellens | NC_014314_51985  | ctcaatatcggagagggttccggtgattggXcggcaggctatctcagcataccaacggc    |
| Dehalogenimonas<br>lykanthroporepellens | NC_014314_9      | ggaaacggctctgggtgaactggaatgttcXcaacaataaatgatccggccggatg       |
| Deinococcus proteolyticus               | NC_015161_10447  | gatttcttggcctcggaaattacttcaXtatgcttgcaccggatgcagcaggaaatccc    |
| Deinococcus proteolyticus               | NC_015161_11839  | gaaccaatattctctgcccactgaggaXctaactctaggaccgtggaatggcaacc       |
| Deinococcus proteolyticus               | NC_015161_15518  | gtagagatactgcttaggtgtgtaagaaXattccgccttactactcctgacggatgg      |
| Deinococcus proteolyticus               | NC_015161_18375  | cgcccgtcaaaattcactccgaattccagXcaaggagccgctatgctgaactaatcag     |
| Deinococcus proteolyticus               | NC_015161_23824  | cttactcatgagtagggccgagtagggcgXatcggtaatgtaatggtgccttggatgc     |
| Deinococcus proteolyticus               | NC_015161_31322  | ggtcaggtgtacatctcagaccgaatgggtXtacgcataatttctctgtgacagctc      |
| Deinococcus proteolyticus               | NC_015161_32738  | cgaattacatacaagagcgcgtaaaagtacXcggcgcttgttccaaggctgcttactgtg   |
| Deinococcus proteolyticus               | NC_015161_40398  | ccgtcatggccatcttctgtgcccgggaXatgcaattgtaggataaactgcaatac       |
| Deinococcus proteolyticus               | NC_015161_44738  | gagcaggaaactattgccattatcggcagXgacatcatcctgaattctctcggactac     |
| Deinococcus proteolyticus               | NC_015161_50269  | gtccggcatagaactcgtcgtagtttgaXcctgcttgaacggatgaacgtgccgaacg     |
| Deinococcus proteolyticus               | NC_015161_52252  | ggtgatacacgtagcctagacagcaatagXcatcccgtcgtatttgggttcttcttg      |
| Deinococcus proteolyticus               | NC_015161_52788  | catagattcccagctcaggtgactgaaXgaggtcctgtccccttaagccataggctc      |
| Delftia acidovorans                     | NC_010002_117727 | catttcttatgccggcgcacttctggtgXtcttgccttctatacatcaacgctgag       |
| Delftia acidovorans                     | NC_010002_126313 | catgagcccagaaccgttgggtcgggatgtXgtagtacgttgatcgggatcttgtttg     |
| Delftia acidovorans                     | NC_010002_150579 | ctgatcttccgattgcgcatgcgctgtcXtctattgatgggaagtctccagccgttac     |
| Delftia acidovorans                     | NC_010002_171511 | gccgtcagccctgactggcttcttgaatgXtgcattctctctctctgatatcagccgg     |
| Delftia acidovorans                     | NC_010002_206663 | gaaatcactcccgaagccttctgctgcaaaXgctcccctgcaacagtgatctgctcattg   |
| Delftia acidovorans                     | NC_010002_32316  | ggtatgacgggagcagattcaacagtgaaactXcgcacacggaccatagctggtactctgtg |
| Delftia acidovorans                     | NC_010002_57456  | ctgttttcatgatggttcgccaagatgaXatagctgctgcatggttctcactgctcg      |
| Delftia acidovorans                     | NC_010002_62915  | caagctcgtgttcatcaaatcccaagaaXcttccagccatggcggctgatgcactgg      |

|                                    |                  |                                                                |
|------------------------------------|------------------|----------------------------------------------------------------|
| Delftia acidovorans                | NC_010002_63536  | ggcactacagcgaccgacaggaacatggatXataccttgcgcttgcgataaataatfcag   |
| Delftia acidovorans                | NC_010002_64018  | gacaacgcaactatatgtttgaggttcatgXgcacttgcacttgcagcaatgcctgccagc  |
| Delftia acidovorans                | NC_010002_64752  | cattccggatgaccaggtcgagaatgtagtXttcagccctctcggagtttgctcatcagg   |
| Delftia acidovorans                | NC_010002_99154  | gcaccagaccgagagcctgtttgaaagttcXggttcttggatgttgcagtttgaatcgcg   |
| Denitrovibrio acetiphilus          | NC_013943_107226 | gaactttacgggtgctcccacaaatattgcXgtgcctgagtgctggaacaggcagatagtg  |
| Denitrovibrio acetiphilus          | NC_013943_11689  | gcccatttccctggctataacaagcagttcXcataggtgttgcctccggtagcattaatc   |
| Denitrovibrio acetiphilus          | NC_013943_23587  | cagtctctatagctctgccaaggagcggaXttcatgagctgacaactcagatacctcatg   |
| Denitrovibrio acetiphilus          | NC_013943_28952  | ggcagccatattctcggcggtatctatcXgtggcggattacatagtaaacgaaatacc     |
| Denitrovibrio acetiphilus          | NC_013943_34264  | gacagccttgaacctgttctcgatatacggXgatgttgacatagcctatgctgccctccg   |
| Denitrovibrio acetiphilus          | NC_013943_39653  | ctttgtttacatttattctcggcatagtcXggtgtggctgtgctgtgagtggtgctatc    |
| Denitrovibrio acetiphilus          | NC_013943_46808  | gtacggcattattatagctttactggctggXggacggctgtggtatctttactgtaccgg   |
| Denitrovibrio acetiphilus          | NC_013943_54000  | cttgcggcaagctttcatagaaggcgXtctcgtcttcagtgctgctgtttacaagc       |
| Denitrovibrio acetiphilus          | NC_013943_5604   | cggtgtgaatgtcgtgtagagcgaatgttXttctatgatgagattcagctgagacagc     |
| Denitrovibrio acetiphilus          | NC_013943_74082  | cccataatgctcctgctgcatgtgacactXctgggagtaataggcggaaagtggaaactg   |
| Denitrovibrio acetiphilus          | NC_013943_88442  | caacagcagccgcatacagggtagacggXcatcagacaacgcaacagctcgcatactg     |
| Denitrovibrio acetiphilus          | NC_013943_93451  | cccttgcctgttcagctcaacggaatagttgXggatagcatctgccgggaagaacagctcg  |
| Desulfarculus baarsii              | NC_014365_114678 | cgatgaatattgaaacgacgaggtcgtttXagcaattggatctgcctggccggctcaaa    |
| Desulfarculus baarsii              | NC_014365_120897 | ctgaaatgcatgtcgtttagggcgaacacgXtttgcctttgatctgccgggtcaacttg    |
| Desulfarculus baarsii              | NC_014365_17908  | cgctgcttctctattcttcatcttctctXgcccagctgctattcatcgtgacgatgg      |
| Desulfarculus baarsii              | NC_014365_37304  | catctgccgctatcagctagtgttagtcXagtctgattcccaagtgtgcaattggccc     |
| Desulfarculus baarsii              | NC_014365_49696  | caaagagatcgaggtattgcttggccatctXaatattggctgaccgctggctcattggc    |
| Desulfarculus baarsii              | NC_014365_54005  | caagtcgccaactgaatgcaattatagagaXggtgacggctgcccgttcaagcctttccgg  |
| Desulfarculus baarsii              | NC_014365_60047  | gtgctgggatgtgctgggaaccatatacXggattcgatcgactggactgcttcaatcatcg  |
| Desulfarculus baarsii              | NC_014365_7873   | gcccagcccggttgcacgaatggttcacgXttaaataatccgaatactccattgctcg     |
| Desulfarculus baarsii              | NC_014365_82700  | cgaaagtgtgaatcgtggacgggcttgcctXtactcaaggcctgtaccaaatccgattg    |
| Desulfarculus baarsii              | NC_014365_89261  | cgccatctgtttgcaaacggcgacatggtXtgccgaatattgcatggatggtatttcgc    |
| Desulfatibacillum alkenivorans     | NC_011768_122564 | cattgagcagctcactaaattaaggcttXcatgcttccatcatgacttctcgggctc      |
| Desulfatibacillum alkenivorans     | NC_011768_190384 | cggccttgggtgattatccctgactataXgccgcttggctggaatgagttggattagg     |
| Desulfatibacillum alkenivorans     | NC_011768_22974  | ctgagttgacgaggtctatgctgacaggXaggaaatacaacaacctggctcaaatcttc    |
| Desulfatibacillum alkenivorans     | NC_011768_316    | gcgcgcttgagattaaggtccctaaattggXtgaacaggggcagcaaggcgagatggtg    |
| Desulfatibacillum alkenivorans     | NC_011768_34352  | gaaagcatccggacatccgctgttttaaagXttctacatgccagtaatacggagagg      |
| Desulfatibacillum alkenivorans     | NC_011768_54370  | cgtaacatgggatagacaatcacctgattatXtgccgcccgtgtaattgtcccaccaatcgc |
| Desulfatibacillum alkenivorans     | NC_011768_99135  | ggtggcgacattgtaccctccgggtacattXgttcgtaaccagaaatgactgcctgtgctc  |
| Desulfatobacterium dehalogenans    | NC_018017_124224 | ggatccatctcattgcccattgagcgtfaaaXgtaactcctcccttaccatctgtaagatg  |
| Desulfatobacterium dehalogenans    | NC_018017_38249  | caggagaagccctaaagccaatgacggcXatcgcttggaaatcatcgataccgctatgg    |
| Desulfatobacterium dehalogenans    | NC_018017_45048  | ggttgtgccgtcagatacccgaagtagccaXaatatgagcagtcactgaaacctcgatg    |
| Desulfatobacterium dehalogenans    | NC_018017_55751  | cctatatcccgaaggaatctatcgagaacXagctgtcactgagggcagatacaatgagc    |
| Desulfatobacterium dehalogenans    | NC_018017_7311   | cgatacagccctaccgtggcccagttggaXagcgggtgtatgtaaatggtattcggcagac  |
| Desulfatobacterium metallireducens | CP_007032_28169  | ggtaactccgattgagcgattaccgttatgXggttaaggtagccatcataaccgaccactc  |



|                                    |                  |                                                                 |
|------------------------------------|------------------|-----------------------------------------------------------------|
| Desulfitobacterium metallireducens | CP_007032_447    | catcgactttcgcctcactatggctcggXtttgtactttcatcctgcttaagtcaac       |
| Desulfitobacterium metallireducens | CP_007032_55736  | cctaagtcctagagcttctctgatacgcctXtgccaggcattctgggcatccatctctgg    |
| Desulfitobacterium metallireducens | CP_007032_64026  | ggccagtttaagtagttcgtccagcctgcXatccagtgcttaagtagattctagctc       |
| Desulfitobacterium metallireducens | CP_007032_77015  | ctcatagcaaaaggctgatacggaggaatcXcttgccatcttctaacgccctagaccgc     |
| Desulfitobacterium metallireducens | CP_007032_8610   | gaatcgccagtttcttccgggattctXtgcctctctttgatcaacaacctccgg          |
| Desulfitobacterium metallireducens | CP_007032_99998  | gtgtaaccgcctttgtctcccgaatggcaXtccactttataaccagttccttggccgc      |
| Desulfohalobium acetoxidans        | NC_015388_103466 | gtacatgattatggctataatctggcggctcXtggccgcagatgcccagaataactgcaactg |
| Desulfohalobium acetoxidans        | NC_015388_11653  | ccgaaatcgaagcggcaataacctctgaaXacatttaccttattctctctcccagc        |
| Desulfohalobium acetoxidans        | NC_015388_17923  | gaatcggtggcaggtctcgggtgtctcXgtagttcagaagattaggcacgtgcccgg       |
| Desulfohalobium acetoxidans        | NC_015388_23914  | ggtgtgtctgaacatcaggattcaccgcXtccagttcgggtgtgagcagatcagcggcc     |
| Desulfohalobium acetoxidans        | NC_015388_29130  | gttattggttagtccgaagggtggcggcXcattcaggcaatgatctaaccgagggctc      |
| Desulfohalobium acetoxidans        | NC_015388_34082  | gattcggaccttaccgctcctcaatcXgcaacgtcgggttatctgattgggaggagg       |
| Desulfohalobium acetoxidans        | NC_015388_39214  | gtagcaactggcgcagggctgaccttggXaaatgagaataatactgtagaccgccaagg     |
| Desulfohalobium acetoxidans        | NC_015388_55809  | cgttcgacatctacgggtatataacagcXgcccgttcctccataatgctctgttggc       |
| Desulfohalobium acetoxidans        | NC_015388_59950  | gaatctatagctcggactgaccgcaccXcagaatatacagaagcgttcagcttccc        |
| Desulfohalobium acetoxidans        | NC_015388_66535  | cccttagccggagtttaagtttgggtcXtctccctgacagactcggacattccagc        |
| Desulfohalobium acetoxidans        | NC_015388_72905  | gctctgctctccactagcagaccatctXatgtgttaaaccttgattatgccatc          |
| Desulfohalobium acetoxidans        | NC_015388_79645  | cgggacctgttggccctgaaatgtcaccgcXaaattatcataatggccggctgtgtac      |
| Desulfohalobium acetoxidans        | NC_015388_81     | ctgcaatgtcagccagccacccttataXtccagcacggttattgccattgtgaggcc       |
| Desulfohalobium acetoxidans        | NC_015388_90152  | gagagtacgttgtgtaaacctgtgagatXtactgtgatgagcagcattgaatcgaatc      |
| Desulfococcus oleovorans           | NC_009943_103293 | gaaactattcggggccgcatattatccaXgttaagccggtcactgtctaaagaattcc      |
| Desulfococcus oleovorans           | NC_009943_110172 | gactttacttattagcctgaatacctcatgXtgggacgtggaaccgactgcatcatgctc    |
| Desulfococcus oleovorans           | NC_009943_117296 | cggtgttctcaggtagagcaagaagcXtttctgtttgattgctcataaagccctcc        |
| Desulfococcus oleovorans           | NC_009943_15373  | gtacaaccagagcaggccatgacacgcggtXccggcaaccaaacattcttgaaccaatg     |
| Desulfococcus oleovorans           | NC_009943_19935  | cgctcggcagctttggcggtcaggcatgXttatataaggaacagagatgctgtcggcg      |
| Desulfococcus oleovorans           | NC_009943_36933  | ctttcccgtttattatctaccatcggXcgtatcccgttattagacgggtacacacc        |
| Desulfococcus oleovorans           | NC_009943_49479  | ggagcccataaggagttcatgaaggcccatXaccgggtcgaatcagccgttgatattcag    |
| Desulfococcus oleovorans           | NC_009943_61726  | cgttccgcaagcggctccgcgactctgtgXatatactgactatacgaagcccatgaag      |
| Desulfococcus oleovorans           | NC_009943_67405  | catccgcatacatgctatcatcaattggXaatcggccagccgctcagatcctgaatgg      |
| Desulfococcus oleovorans           | NC_009943_73079  | gtagcggcgtttatctcagcctatggtatcXattcatcaaggctgggacctgggattgac    |
| Desulfococcus oleovorans           | NC_009943_9246   | caggcattaagtttgcagttcggcctctXaccggcgaaggcagcccaagtgattctatc     |
| Desulfococcus oleovorans           | NC_009943_93719  | gtttgcgtcatagatcagggcattgatctcXcctgaacatggcctcaaacctttgccac     |
| Desulfohalobium retbaense          | NC_013223_14127  | gctggatattcaaggatttctgtcggctcXcatgctcgtgtccagtttaaccaattgac     |
| Desulfohalobium retbaense          | NC_013223_260    | cgagcaagcctgtgattgttftgtgtgXgtgacaattctcaaggacaagaagcgaag       |
| Desulfohalobium retbaense          | NC_013223_37198  | cctgggaagtattcttaatgcctgttcttXtaacctcagatacaaggtcggcagctgg      |
| Desulfohalobium retbaense          | NC_013223_41027  | gatcgggagaaggtcgtgagtattcccXaatggacctcgtcctggaatgtttctcag       |
| Desulfohalobium retbaense          | NC_013223_45807  | cgctggccttgggtcagtaacttctgXtctatcgtttgcccgcgttggcatagatg        |
| Desulfohalobium retbaense          | NC_013223_70102  | gagcacaatgcgacgggaatcacaggagatXcgtttgtttgtctcgggaatgactactc     |
| Desulfohalobium retbaense          | NC_013223_76627  | ctagtgttggcttctgaactggatgggaXgacggcaatgacctccagcagggtaaagc      |

|                                       |                  |                                                               |
|---------------------------------------|------------------|---------------------------------------------------------------|
| Desulfohalobium retbaense             | NC_013223_79906  | cgatttctctcagctttcgtgacctgaccXcccgatagagtaataaacgaggagcaaatg  |
| Desulfotalea psychrophila             | NC_006138_112832 | gcgtctatatggcaaaagtttctcgatacaaXgcctggctatgaacatctgcttctgggcc |
| Desulfotalea psychrophila             | NC_006138_117367 | gcacgctcttgaccaccagggacaaccaXataatggcgatttggctattataaccgccg   |
| Desulfotalea psychrophila             | NC_006138_24208  | caccgatgagcctttgatgcgtgagctggtXcactcagattaactttatgatccatctgcc |
| Desulfotalea psychrophila             | NC_006138_38208  | cgacatgctctaagagaggcgtctatgttgXcgaagtgtaaaggctgtggcttatgtcagg |
| Desulfotalea psychrophila             | NC_006138_56527  | cagtaagcgtcgtatgttcacagtcacgcXccgatccaatgcaggaatcggtaataagg   |
| Desulfotalea psychrophila             | NC_006138_7463   | ctacttgcctgccaccgattattgtattXgagcagacactttccggagcagagaatggc   |
| Desulfotomaculum acetoxidans          | NC_013216_121059 | cagcacggttacaagtaaagcctttggctXaagctgctcttggctgcaggctccctgtcc  |
| Desulfotomaculum acetoxidans          | NC_013216_136771 | gttaagactatctcgatgaatctgtctaaXtgccttaccgccctgcaggcgaactgc     |
| Desulfotomaculum acetoxidans          | NC_013216_15046  | cggtatattagcgggactatggcgcctgXatatttcagcgggtgctccctggatgaaag   |
| Desulfotomaculum acetoxidans          | NC_013216_22910  | gctcattgcctgttgacgctgtccaagagXaatctaccggcaggcagttgttcaaacccg  |
| Desulfotomaculum acetoxidans          | NC_013216_30011  | ccgttatgcctgccgctcaggtatattgcaXcttgcgtgactgtatcaatttggcatac   |
| Desulfotomaculum acetoxidans          | NC_013216_39014  | cccactggctgccaaacattttgtctgXaaccagctctgtgccgttatatttctg       |
| Desulfotomaculum acetoxidans          | NC_013216_56080  | cagttggctccgctgctgtagtttgattacXcgtcaggctcagattgacaaggatag     |
| Desulfotomaculum acetoxidans          | NC_013216_65320  | gcactttgcaaggtatactgattgctgtgXggccttctatgccactatcttggagggtg   |
| Desulfotomaculum acetoxidans          | NC_013216_94879  | ggtggctgtgttgaatatcagcctacagXatactgtcaggcaataaccggaactgcgcc   |
| Desulfovibrio vulgaris                | NC_002937_11680  | cgctaccgtgaaagctattctctccatXcccggcctctgtgttcttctcgtaaac       |
| Desulfovibrio vulgaris                | NC_002937_19881  | cagaacgaaatagattcagacgcgtatcXccttctggcggcgacgaagataggcacgg    |
| Desulfovibrio vulgaris                | NC_002937_41355  | ctcgattccgacgaatcgtctcctgtattXtgatctctctcatggtaccgggtggagag   |
| Desulfovibrio vulgaris                | NC_002937_44869  | gaaatgctgatgatattccggctcgcXgcaaaagcgggccaatagtgtaacctagc      |
| Desulfovibrio vulgaris                | NC_002937_671    | cagtcacgcccggctctatcattatcagcXcaggttccatcagctgaacgggtgaaggag  |
| Desulfovibrio vulgaris                | NC_002937_68437  | cgcaaaactaatgcctattcggccttXctccggatccgcttggcactctcag          |
| Desulfovibrio vulgaris                | NC_002937_75073  | gatgcctgtgggaacacagccatgtaaccXgtccagttcgggtccagttgacaatacc    |
| Desulfovibrio vulgaris                | NC_002937_81351  | ctaacggcgtcggaggatgctctcagggtXcgggttactataccagatgatgtcgc      |
| Desulfovibrio vulgaris                | NC_002937_87115  | ccagttgaagcagttcaaaaggcctcatcXtccatgacgtctgttgaacaatcttctg    |
| Desulfovibrio vulgaris                | NC_002937_93194  | gtgaagcagcaggtctatcagatgcgtcagXtccgaccagttgaaacaggtactgtcgc   |
| Desulfurivibrio alkaliphilus          | NC_014216_113    | ccagtaatccagccgtgttggccgctgaXcaccagttatcagttatgtttaaactttg    |
| Desulfurivibrio alkaliphilus          | NC_014216_25764  | ggcggctctgatcaatcaggtcctgaggtXtttccattttacacaaccaatcagacc     |
| Desulfurivibrio alkaliphilus          | NC_014216_35824  | ctatattggtgaagatagtgctcctaaggXctacggcagatgcaagatggccgccgaagc  |
| Desulfurivibrio alkaliphilus          | NC_014216_44292  | gagcgtgtgaatcagatgtcagcggaccaXttatctccatggtctgctcaaaagttagcg  |
| Desulfurivibrio alkaliphilus          | NC_014216_77477  | ggttgcaacaagccgattaacgctccagaXttcagccctgttattactactgtctatcg   |
| Desulfurivibrio alkaliphilus          | NC_014216_81792  | cacaagttcccatggcgggtattcatcXtggcatatctacaacccatctgcatcgc      |
| Desulfurivibrio alkaliphilus          | NC_014216_92542  | cctggaacgacgtgtcatgagtatcgcXgtaacgtcaatcatggtggagcaggtgc      |
| Desulfurobacterium thermolithotrophum | NC_015185_16497  | cgcttgaggaaagcggctttgacaggagXctgaggagagaggcataaattaaacatcg    |
| Desulfurobacterium thermolithotrophum | NC_015185_16956  | gtcgtttattatctgctccatgtagattcXgtttgtactccagcgtatggccagcatgg   |
| Desulfurobacterium thermolithotrophum | NC_015185_25643  | ctttatagtcttatgagttgcagcacctaXctccgtaaaagcagcactccttggcacttg  |
| Desulfurobacterium thermolithotrophum | NC_015185_2825   | ccgctgtttctcgggaaacggtgagacttXagggaaacaattgtgatgtaaatccctg    |
| Desulfurobacterium thermolithotrophum | NC_015185_4053   | cgctcgaataggaggtagttgatgtttgatXttgtagaagcagcagctggtgtgaaatcc  |
| Desulfurobacterium thermolithotrophum | NC_015185_43558  | caagtaatgtttcacgggtgatgctccgtXcgtatagatggcagctcctacgattatc    |

|                                       |                  |                                                              |
|---------------------------------------|------------------|--------------------------------------------------------------|
| Desulfurobacterium thermolithotrophum | NC_015185_47580  | gcgcgatgtttaaattatgcctctctctXattctcctgtcaaagaccgcttctcaag    |
| Dyadobacter fermentans                | NC_013037_10733  | ccagtagataatcgtccggcgtgtgaccXttgtaagctcctccacattaccatg       |
| Dyadobacter fermentans                | NC_013037_113444 | cgatgaatatccgcatcatcgaactctcXatagtcctgaacgattatcgtccacc      |
| Dyadobacter fermentans                | NC_013037_176870 | gaagcaaccgaggtaatcggaaagtcggcXggaacgactgttccaacagtaggtacgctg |
| Dyadobacter fermentans                | NC_013037_232239 | gatcggaaaccgagaatgtaactgatcccaXtttcgcatcagtcagataatcggacc    |
| Dyadobacter fermentans                | NC_013037_48795  | cataatcgaatcggtatcgatgctcgtXcgacgatgagatccacacctacgcttgg     |
| Dyadobacter fermentans                | NC_013037_52     | caatgcgtcatttacgcattaagctgtacXgctgggacaatcacattaccatgccgg    |
| Dyadobacter fermentans                | NC_013037_63470  | cgttgataatggtggcttcggcgtacacatXcgatcccgaagaggtcctgaattgaggc  |
| Dyadobacter fermentans                | NC_013037_88839  | gcccggattcggctgatgcataagaggaXaatagtgattgctgctcagcaaacgac     |
| Eggerthella lenta                     | NC_013204_103285 | caaaggcaagatcaagttgaatatcgaggtXatgcacgctggaagggccttgcgttg    |
| Eggerthella lenta                     | NC_013204_106711 | ctgcttcttgcctagccggaggcttcXgcaataacagatgcttctgataaccg        |
| Eggerthella lenta                     | NC_013204_108720 | cagtcatacatctaacccacgcaataaccXaggcgggcaatgattatgtgacgaacac   |
| Eggerthella lenta                     | NC_013204_113388 | gacagcgaggctccaactcctgccaccaXccattggcatagtcaccatatttgaac     |
| Eggerthella lenta                     | NC_013204_2592   | ctgagaacctgctcatcgacgaatctXggcgtgaggtcatgttcaagaaccac        |
| Eggerthella lenta                     | NC_013204_27999  | cgaacatgggaattcgcgaccatgatggagcXgttactgaacctgtattgtgagaaggg  |
| Eggerthella lenta                     | NC_013204_32179  | catagtcctcaactgattctgtgctaaXttaccgaccttccgtaaccaagaaggg      |
| Eggerthella lenta                     | NC_013204_67899  | ggacgtccacttctcatggagaatctcgtXcgttacagcttctgctttacaccagg     |
| Eggerthella lenta                     | NC_013204_82652  | gctgctggtgatcatgaagcacttctgctXcacgacctcgcagcattctctcaagtg    |
| Eggerthella lenta                     | NC_013204_95409  | cgcgagcgacaggaactcttaactcgtXccactcggagaaagacgatcagagcatc     |
| Eggerthella lenta                     | NC_013204_96843  | cgctcttactctccatcgaggtattgXacagcctcgtgacttcatggtgatgctg      |
| Eggerthella lenta                     | NC_013204_97397  | caccatgatagaccagcgttctccatcaXgatcaagcaattctcgatcggcgcgatgag  |
| Elusimicrobium minutum                | NC_010644_13084  | gtacattgttccgctgttggcaatgatacXctggtattgtctcagtcggatcagaggg   |
| Elusimicrobium minutum                | NC_010644_18507  | ggtaaagcgaagcattgacactttaaccgaXcccagtaggcttgagaaccttccatagc  |
| Elusimicrobium minutum                | NC_010644_25001  | gtagcaagggcagcatgggcatacgaXtccgattgtctcacagatataaataac       |
| Elusimicrobium minutum                | NC_010644_30540  | gaagttgtaatgtctgtcgtgtaacaXccgaaagcattgatgtgccagggccgg       |
| Elusimicrobium minutum                | NC_010644_33933  | cgtaaagggcaacttctaaagcggaaattcXctatacggcccagctgcattatgacaag  |
| Elusimicrobium minutum                | NC_010644_43618  | ctcgagcccattgtgacagctgtattataXtgggcgccgttatcgggtgtatgctgaag  |
| Elusimicrobium minutum                | NC_010644_46121  | cacgtgcccgttaatacttattccatXattaacgccagtgctggaagcactcttgc     |
| Elusimicrobium minutum                | NC_010644_49073  | ggtgctgttattggccttacggcgtggaaXgtaatgatgaccgaggaacgcttgac     |
| Elusimicrobium minutum                | NC_010644_52337  | gaagccgcccataataatggtctgctXtcaacggcatttacaattcatcatgacc      |
| Elusimicrobium minutum                | NC_010644_8472   | ccatagagcgggtgtaacttaatagtagcXcgcctcaatccggaagcggaaataatgc   |
| Enterobacter cloacae                  | NC_014121_104392 | gtctggccatggcgttgcactctgtXtcaatggtcaggaagatcgttatccc         |
| Enterobacter cloacae                  | NC_014121_108784 | ctgtgcttctgtttacctggaattcatXctaccatgttcggtcctgattggacg       |
| Enterobacter cloacae                  | NC_014121_109778 | ccgggtatcagactgataattccctcXggacgctcagaagggcaatcatattgag      |
| Enterobacter cloacae                  | NC_014121_118873 | cccggagatgcttagctgttggcaggacaXaatagtcagttcattgaaagcgaagtgtg  |
| Enterobacter cloacae                  | NC_014121_11991  | gacattatcgcagtcgaacgatctgggaaXgatttacagcaataagccatctgggaaag  |
| Enterobacter cloacae                  | NC_014121_134520 | cgggcaacctaaactctgcttattgcctcXtgtgagctataccgatggcctcactttc   |
| Enterobacter cloacae                  | NC_014121_147155 | ctaagcgtaaagaagcactggcgtgcataXaggaatcagtatgacttaccacccaag    |
| Enterobacter cloacae                  | NC_014121_157321 | gaggtaccctgctggcagcaaatcagaatXgcaatggcagatcaacatcaagcttgac   |
| Enterobacter cloacae                  | NC_014121_15875  | gtgtgcagccctgttaataacggctgaXcgtcctgaccttattgatctgacgcttc     |

|                              |                  |                                                               |
|------------------------------|------------------|---------------------------------------------------------------|
| Enterobacter cloacae         | NC_014121_174474 | gtattctcgcctctcaatgtctctgaaacgXacgcttgcattgatggccttaccttcgg   |
| Enterobacter cloacae         | NC_014121_19547  | cggtatcggtaaatatctgcactggcgtgcXtgggtgcttctgggctagcgtcaaaag    |
| Enterobacter cloacae         | NC_014121_31537  | ggftacgctccctgtcacggatttgcctXtctgatacacgctcgtgtgttacgtccg     |
| Enterobacter cloacae         | NC_014121_54014  | cacctgattccgttgcgctgacctgggcXatgagcctgtttaccgctgtattaccgctc   |
| Enterobacter cloacae         | NC_014121_57664  | gagaaactggccgaactttctgatgcgattXgatctgattgagagtgccgtagaaagtagc |
| Enterobacter cloacae         | NC_014121_64924  | gcagcaaacaccgcgggcgtgataagtgtgXtgcgggttataggtacatggttaagtc    |
| Enterobacter cloacae         | NC_014121_70280  | ggaaacgtcagttccgtctgtcacttccXaccagttcaacgctgtcaccagctcttc     |
| Enterobacter cloacae         | NC_014121_75097  | gacataaagaggcgggtattacacctgacctXgctttatctcggcagtcgctgctaac    |
| Enterobacter cloacae         | NC_014121_75119  | cgcacgcttggatcggttaagcgcctaaXatagtcgcttactgttccagggtgatacc    |
| Enterobacter cloacae         | NC_014121_80859  | cgccataaatacgcaggcggcggcgatgaXtccaagattaatccagggttgcgctcc     |
| Enterobacter cloacae         | NC_014121_83055  | cagcagagcgggcaagccttagcgggacgcXatgattgaatgttacagcgtatgatcgg   |
| Enterobacter cloacae         | NC_014121_842    | ggcgcgaaataacgtgtgagaattgtgataXcacataaattcatgcctggcggtatgctg  |
| Enterococcus casseliflavus   | NC_020995_11237  | gtcctgaaatggtggcgtccatcatcgagcXgaccgactgagatattcttagcacttaac  |
| Enterococcus casseliflavus   | NC_020995_21289  | gttgctatcatgccgtccgcaaaccacXacagcggctagctgattgatcctttgatg     |
| Enterococcus casseliflavus   | NC_020995_41761  | cggtagaaaactgtactctgaacgcacgctXactgacacggttcacacctccgtctaac   |
| Enterococcus casseliflavus   | NC_020995_53125  | gatgagcgttacttctgatggcttccgtXacacgagtgctgtgttctgaaagtgtgag    |
| Enterococcus casseliflavus   | NC_020995_5792   | ctccgatacgaagcctgctcgaagtagaXtggcttctgtacactccgtatccagac      |
| Enterococcus casseliflavus   | NC_020995_59995  | cagccaatgtccaagtaagggttgcctcatXgaaccgtttctccgtccgctcagctgtg   |
| Enterococcus casseliflavus   | NC_020995_6      | gatcgagactccaatgtctgtctgttgaXagagctgaatccggccagttatagtcttg    |
| Enterococcus casseliflavus   | NC_020995_98821  | gttgaccctgcgatgctcacaagtcccaaXcgctctgctgttctccacaagattctg     |
| Enterococcus faecium         | NC_021994_16916  | gacagctactggacctgagttggcagaagtXctactccattccaggtattctattggctg  |
| Enterococcus faecium         | NC_021994_19553  | gcaggcgaacaggtgctgttatcactgaaXtctgagcccaatcaaacactagtctccag   |
| Enterococcus faecium         | NC_021994_21060  | cggaagaatcgttactcatggttattcaXcagctgtctgcccttattgccgaactgaag   |
| Enterococcus faecium         | NC_021994_36123  | gcgtattgatcaacacaggtggagaatcagXtaccgatattgtctgctcaactctcatg   |
| Enterococcus faecium         | NC_021994_39080  | cgcgcttactggaagctttacgggtcaXgcaggagatagcttctgttggatggaggac    |
| Enterococcus faecium         | NC_021994_43280  | ggatcaaggaatcgttattggcagatcaXagctgggtgctgagtgattcgtggcatggc   |
| Enterococcus faecium         | NC_021994_44873  | gtcgggagttggaagctgttatcagcggcXaagaacagcaacgcgagttgaaacgaac    |
| Enterococcus faecium         | NC_021994_55036  | cagctaccatgtaccgctgacgttactgXaatctttagctgctgacttgcacgatac     |
| Enterococcus faecium         | NC_021994_55340  | cagcattccagtcagaggttgttcgactaXctactgctctgattgtatcgcagttactc   |
| Enterococcus faecium         | NC_021994_65758  | caagaagatccgatgattgaggaaacgaagXccaagtgagcagtgcatgtatgtagtgc   |
| Enterococcus faecium         | NC_021994_70288  | ccgctccaactaaagtaagtggctgctgaXtctgaaatcggctcaccgttggctgctg    |
| Enterococcus faecium         | NC_021994_83361  | ctcaacacgtgaagcggcgaactactctXctggcacaagaagtcgctgctgtgtatagc   |
| Erysipelothrix rhusiopathiae | NC_015601_11764  | cacttgcgaaagcggaccggatgtgagatXcatcgagttgtaagtaaccatccaagaac   |
| Erysipelothrix rhusiopathiae | NC_015601_14134  | gagacgtccaccgcatcacaattatttXtgcagttcgagatgggcatgttctctgg      |
| Erysipelothrix rhusiopathiae | NC_015601_18061  | gcgtaagtgtccgttcaggtaacattcgcXaggatgttcagcttatcaaacgagaag     |
| Erysipelothrix rhusiopathiae | NC_015601_23821  | ggcaaacagacattcgtgtgatccaacctgXcagtgacttaccgccgaattacgttc     |
| Erysipelothrix rhusiopathiae | NC_015601_30101  | gattccgtaaacgataatggaccagctgtXgattcagatgtaaacaccagctattcctgg  |
| Erysipelothrix rhusiopathiae | NC_015601_39988  | ccattcacttccaaggaagatctgtcacXaccgaagtgttaccgcccttcatgagg      |
| Erysipelothrix rhusiopathiae | NC_015601_41077  | gacacgctgctgagttatcaacaggaagXtacgtatggagcttcatgcatcgaagttcc   |
| Erysipelothrix rhusiopathiae | NC_015601_48064  | cagtgcttctcgaccatgaagcaaccgtXtccatgattcccttaccgtgaatccac      |

|                              |                  |                                                               |
|------------------------------|------------------|---------------------------------------------------------------|
| Erysipelothrix rhusiopathiae | NC_015601_51734  | gttggtttatgggcatctttatcgagaacgXttggtttcaccggagcctgcttattcacc  |
| Erysipelothrix rhusiopathiae | NC_015601_59012  | cacgatacacttgatacgcctgtttctaagXtggccttctgtgctgcgcgggtacatcc   |
| Erysipelothrix rhusiopathiae | NC_015601_721    | ggtaatgcgtgaccaccaccaagatggXagtccaaccaatagaaagcagtaagac       |
| Erythrobacter litoralis      | NC_007722_101719 | ggcactaccttaccttattctggtgtcXtgcagtgacgggtaatgcatgtgtgagac     |
| Erythrobacter litoralis      | NC_007722_112    | gccccagaccggtgtcgtcgtcgtctgtaaaXtgaacgaaagtataggacgtgtgtccgc  |
| Erythrobacter litoralis      | NC_007722_18857  | ccttgtgaaactatggatagctgaccgtctXagcattgtccgtgtaactcatgtctctc   |
| Erythrobacter litoralis      | NC_007722_28577  | cgtaaaagatagccagatacctgtcggcXtggattcgttctcgagccgcgatgttcg     |
| Erythrobacter litoralis      | NC_007722_30733  | ggataaactccaagcatacttagtcgcggaXgcaagttgagcccaactcactggaacgtc  |
| Erythrobacter litoralis      | NC_007722_53124  | cgagattcgtggcagttgaacaattatccXgtatgacgatccggccctataccatgg     |
| Erythrobacter litoralis      | NC_007722_82558  | catgattgctcgcgcctatgtcggccacXgtaattcaggtcatgcatgacatacgggc    |
| Escherichia coli             | NC_011750_159636 | gatatacgtcttccggcgtcagtgcttcgXtgcgccggaatattgcatccctgcagaag   |
| Escherichia coli             | NC_011750_165135 | ccagatacgcactggctgatgcaagcagtXcctcgaacccttaacaaataggacatag    |
| Escherichia coli             | NC_011750_16744  | ggtgtcggcgtgggatattcgttctaattXtctcgggatacacaactgatttcggtgcg   |
| Escherichia coli             | NC_011750_168963 | ggtgatgtagagcagcaaatgaacgcttatXagtggagcctgttctagtgcggcatgctcg |
| Escherichia coli             | NC_011750_24277  | ctttgcgcagaaggctttatcaagccttgXcaatattgttgcgcgggaaagtggatcc    |
| Escherichia coli             | NC_011750_31050  | caatgagctgaatgccatgtatgtctgaaXgcaaatccagcgggttcagtcagacacgcg  |
| Escherichia coli             | NC_011750_59513  | gataatggcggcaacacaccggatgatggtXtctgacaatcctccagctaccgccgatgac |
| Escherichia coli             | NC_011750_93572  | ccgggatctctatcggcgttagtggtatXtaaacctcgttccgctctgttctgttg      |
| Ethanoligenens harbinense    | NC_014828_16438  | cgatgtgacacggatgttctcctcaacgaXgaagatctgtaccgcagtaagaattacgg   |
| Ethanoligenens harbinense    | NC_014828_19972  | ctgggattgagcgaagtattcaatacaXccaagcaacagccaagcagatgctgtg       |
| Ethanoligenens harbinense    | NC_014828_26084  | ggtccttatgataagcagatggcctacatXggttggaaatggccacatgactttgtcgc   |
| Ethanoligenens harbinense    | NC_014828_45346  | gaaagcctcattaccggctctcttataXaaatcgacagctcctggtcctcaaaactg     |
| Ethanoligenens harbinense    | NC_014828_54641  | ggatcgtattaaaggctactctcgtcttatXctctccgaactgcgctactttgtcttcc   |
| Ethanoligenens harbinense    | NC_014828_61093  | gtccatctcccgaatttatggagccagaaXcaggcgttgacgtgtgctgtttatgttac   |
| Ethanoligenens harbinense    | NC_014828_67250  | ggtcagatcggctattccattgaccgaaXtaccgacgaactgctcctgtaaccatcc     |
| Ethanoligenens harbinense    | NC_014828_75239  | caccgtgctgttattggcatatgacattXcgtttgtgctgatgacatctccctcgcg     |
| Ethanoligenens harbinense    | NC_014828_91198  | gtgacatgttctgcttggcggccaggagcXttatccgcgctgtattattgaaaggaaac   |
| Eubacterium eligens          | NC_012778_12294  | gaatacaacattgtcaagcgtgagtgctcXaccctgattagaaggaaggcttcaaggtc   |
| Eubacterium eligens          | NC_012778_26007  | gactgctatacagataatcgctcctgatgXagctgcttggcgcgatgtaccggtaagg    |
| Eubacterium eligens          | NC_012778_3739   | ggagctgcactggctatctgatactgttXgaccgattacagcagactggtcttaac      |
| Eubacterium eligens          | NC_012778_50476  | ggctggtgtcctgttccattacaataactXagacccttctcgaacaccattggtgcc     |
| Eubacterium eligens          | NC_012778_52874  | ctgcacctcttgtgcccgtatcgccttXtcttacggatgtattctcattgctctg       |
| Eubacterium eligens          | NC_012778_63442  | cattcctctgccagctcgtgagagaccXtctccgatgtaatgcatacttaggaatc      |
| Eubacterium eligens          | NC_012778_65879  | ccgtccgggtatattgcatcaggtgatgtXtcttgacgcagacgagactggtcacacaag  |
| Eubacterium eligens          | NC_012778_68656  | ctgcacttgcttgacaagcacttcatctgXgctggtgccaagtctgtaagctcctaac    |
| Eubacterium eligens          | NC_012778_6947   | cgctcctggtgcccgtctgatagcctgctXggagctgtctggaagcattgaatgtatc    |
| Eubacterium eligens          | NC_012778_793    | ccggtcttaaggaaggaagataagatgccXagagtcgataaatcccggctggaagtac    |
| Exiguobacterium sibiricum    | NC_010556_13224  | gggcggaagtcggcgtgtattcgaatcaagXtgggtgacgagattaacgcgagtagctatc |
| Exiguobacterium sibiricum    | NC_010556_18232  | gtcgaggccgattctggacttctcggcaaxAcaaatattcgttggattatagtgccctc   |
| Exiguobacterium sibiricum    | NC_010556_34711  | gttccgttgatcggattgattccgtccaccXataacaggatgacagattctctgatcctc  |

|                           |                  |                                                               |
|---------------------------|------------------|---------------------------------------------------------------|
| Exiguobacterium sibiricum | NC_010556_38445  | ggcggaccgggtcttaagtctcgatacXctgtctgaattccaacagctatcgttc       |
| Exiguobacterium sibiricum | NC_010556_69850  | ctcggcatctggttcgcgctcatctttXaaacgtatcatgaactcgcaatccggtg      |
| Exiguobacterium sibiricum | NC_010556_8425   | ctgttatcggaccggaccttcacgggtatXtgaagacgacgttccaacgttgacgg      |
| Exiguobacterium sibiricum | NC_010556_85116  | gatccgttatcgtacagctgtgtgtctXatccgggttcattcaggattaccgtcacgac   |
| Exiguobacterium sibiricum | NC_010556_96816  | gacagatgtagcaccggcaacaattgttXctctgccctatctcaagtcgcaagag       |
| Fibrobacter succinogenes  | NC_013410_106085 | cgaatgggctctggtgtccgtaaacattgcXcgtcccgagtggtttacgtttgacatag   |
| Fibrobacter succinogenes  | NC_013410_115006 | ggtgattggcaagacgaactgaactgaaXtctgctgctgattgtgaacctgctgttg     |
| Fibrobacter succinogenes  | NC_013410_14437  | gtttgtccttctgaacggaaactgtgXgattgtcgaagcccttcatgtgacatag       |
| Fibrobacter succinogenes  | NC_013410_28229  | ggtaattgccttcgagagattcgtgtggaXtcatctcgcgtgttcaagaccttctgc     |
| Fibrobacter succinogenes  | NC_013410_34399  | cttatctcggagcaggctctaaagcgaXaggttctgtccaacggtgatactgctcc      |
| Fibrobacter succinogenes  | NC_013410_49732  | ctctgcacggctgaagtaaacgatgacatXaaagaatggcaccgatggtaaggatggaac  |
| Fibrobacter succinogenes  | NC_013410_61983  | cgggtaaaccttataggccagcccaacgtaXcaacggaaactggtctatccgttcacgtc  |
| Fibrobacter succinogenes  | NC_013410_67772  | cagttctacctcacagatttgcgattgacXatcccgctcaatgtggaacttcatgaaac   |
| Fibrobacter succinogenes  | NC_013410_74293  | gttcaatactgagtttcgagagcgtcgtcXatcggcattgcatctagcaatggttcag    |
| Fibrobacter succinogenes  | NC_013410_93745  | ctaccagcacgatttacaactcatccgcgaXtgggcatltagcattcgtgcggaatcc    |
| Fibrobacter succinogenes  | NC_013410_99249  | ctgagcgtatgatgcctgtacatggtggXaggtttacggacaattgtgatggccttg     |
| Fingoldia magna           | NC_010376_2096   | ccttgtaaaccttgagttaggtggcgaXttctacgctcactatggcaaggcaagtgc     |
| Fingoldia magna           | NC_010376_40878  | ggtatagcagcgttcacactggtagaaccXaaactatcgaatccactcgaaccaaaagcg  |
| Fingoldia magna           | NC_010376_4704   | ctatgcaatagagcgcagacaccacttctXataatcacgattcgtgttggcaggaag     |
| Fingoldia magna           | NC_010376_50487  | gccttcttggagcctctgcaatctgtttXaaactcatctgcagtaaggccaagctgttc   |
| Fingoldia magna           | NC_010376_52417  | gtcacattcgtagaatgtgggcaagcggXtctgtatgtaattgcttcatgctgcaccc    |
| Fingoldia magna           | NC_010376_56180  | catggaagtgcgagtattacatcgtgcaaXgcagttctctgacatcgtccatgcatcc    |
| Fingoldia magna           | NC_010376_57464  | ccgatgcactcgtgcatcgcagattgcacXaaactcactacaagcgggtaagtgttcg    |
| Fingoldia magna           | NC_010376_5837   | gggaatactcgcaccaataactgatgcaXggcatcgtgattaccgcttgcgggttgc     |
| Fingoldia magna           | NC_010376_7541   | ggtcaactgacgggacttcgattcctgttXgctgttacaatcatttggcgaagggtgtc   |
| Fingoldia magna           | NC_010376_9365   | cgttgacttagcgcagttgctggagattXtctgtgctactgcatgcttgcgacatc      |
| Flavobacterium columnare  | NC_016510_582    | ctgcaagcggctcgtatgatagaggcggagXtctgatagaagtgcgaaccaggaaactatc |
| Flavobacterium columnare  | NC_016510_67264  | gtcgaagggtcttactaatgggttcagcXtcttccctcttcatgctgtaacaatcg      |
| Fluviicola taffensis      | NC_015321_127818 | ggcagttgcagttatattgccgtaccggcXcttactgcaagatactgtttgtctcc      |
| Fluviicola taffensis      | NC_015321_147568 | ccgtgaaactgatggaaggacgtatacaaXaccgaggtcaggaatggatcggttacgtgg  |
| Fluviicola taffensis      | NC_015321_15036  | gaggaaagcaatgctatctattcagcXtcaattaaccgttccaccgcccctgaaatg     |
| Fluviicola taffensis      | NC_015321_27056  | ctggcgttaaagtaaacggctcctgctgactXcaatccctaccgtaattattaccgctc   |
| Fluviicola taffensis      | NC_015321_34689  | gattcgtctgtaccatctgtattattccgXttggcctccagagcatttctcggtatc     |
| Fluviicola taffensis      | NC_015321_45540  | cctcctggaatattcatcctggagaagtaXtggctatttccaactgaatccagatgcg    |
| Fluviicola taffensis      | NC_015321_61787  | ctttctgccaagtaaccgggttattgcagXgaccaatcggagttgcagcgcatttagctc  |
| Fluviicola taffensis      | NC_015321_95590  | gtatacccggcattgtgtataacggatgXatgctgatattcggatcggaaagcaggtgtg  |
| Francisella tularensis    | NC_006570_13817  | ctagaagaggcttggctggagcgttgaXggtgctgatattgatacctctacgacaccg    |
| Francisella tularensis    | NC_006570_55149  | gtcaagtctctgagcctcctgttatattcXgcgcaattgctactacagcgggtactaag   |
| Francisella tularensis    | NC_006570_61048  | ctgataatgtctccagatgtatgtggagXctcttaccagcagataccttctgtgag      |
| Francisella tularensis    | NC_006570_61092  | gcttactactgctggtatcgtgttcgctXtctgagagggttccggtgtataggttgg     |

|                              |                  |                                                                |
|------------------------------|------------------|----------------------------------------------------------------|
| Frankia alni                 | NC_008278_130485 | gaggaatattcgaatgcgtattgtggtgatXaagccgaatgctactctggcctggtgac    |
| Frankia alni                 | NC_008278_14548  | ccaggaacgtggatccgtgagctttctagcXgttgctatcgtatftccgctcaggtgccttg |
| Frankia alni                 | NC_008278_151199 | cagcttcagctggctcatgctctctgcaaaXcgataaggttaggtttagcctaagctggtgc |
| Frankia alni                 | NC_008278_196376 | ggctgtcgtagcagatccgatattgatgXtctaaactcttagctctcggctcagcaggtac  |
| Frankia alni                 | NC_008278_220877 | ccatacagccatggcgtagattcctgtaXccatcaatgcttccgacgccatctgtgac     |
| Frankia alni                 | NC_008278_228951 | caacctccaccgcaaatgaattggctgagtXgccactacttgaagatcgtgatgcgagag   |
| Frankia alni                 | NC_008278_233598 | gtagtcaacatcagaacatgaatatcaacXgggatgaccgccgagtggtccatctcgg     |
| Frankia alni                 | NC_008278_249051 | ggaaattcacgaccttctcatcgggatcgXtctccacagcttcatccacagacgaaccg    |
| Frankia alni                 | NC_008278_28344  | gctcaagctgttatgtcggctcggcgtXggatctcaactcagttagccaacgataacc     |
| Frankia alni                 | NC_008278_6441   | gctctagtctcagcgtcaccagattcagXtccaactctgttgaccaactcccgcac       |
| Frankia alni                 | NC_008278_84303  | gaaatacagacaacatgcctgtctggacctXgctgatctcgcacggatagatcttggtcg   |
| Frankia alni                 | NC_008278_93954  | gtagtcttccaggtcggcgggagaatgXtgagcagctccgacagtagtgaatcac        |
| Frankia alni                 | NC_008278_99532  | cccgcatttgatcagcaagacattgagXcatctacaccaccgagggattgacgatg       |
| Gallibacterium anatis        | NC_015460_16314  | cgaacacgcccggatcagcatgttcaactacXtttgattggcaacaccaactgagcgac    |
| Gallibacterium anatis        | NC_015460_22396  | gtactctgtgtaacagaagatagtcagtXaactggcaaacgggatacggctgttgaaac    |
| Gallibacterium anatis        | NC_015460_29030  | cacggttgagctatcagccacagaacaatcXtgcggcgtgatgaaattcactaccaag     |
| Gallibacterium anatis        | NC_015460_36133  | catcaagtattctccgaacctcaatgctXtctgtcagcggtttagcggaaatcccaac     |
| Gallibacterium anatis        | NC_015460_4555   | gcatgataaccttccatcgggtgaaagataXcctaaccgagcccaacaacttgaaccg     |
| Gallibacterium anatis        | NC_015460_53880  | ggctgcaatggtgtaaccggattattagcXtcaatgccgataacagattgattgctcc     |
| Gallibacterium anatis        | NC_015460_56425  | caatcgtatggctatgggtgtagtcacacXctatggcggtaacttggcaaatggtac      |
| Gallibacterium anatis        | NC_015460_58632  | gtcagcaaccagattgcttccgggtgaXaaatcctgatccagctcagtaatgacgagc     |
| Gallibacterium anatis        | NC_015460_64     | ctttctccggcatagtaagtcgttctgaXtctaaatgtttattggcttccctcccg       |
| Gallibacterium anatis        | NC_015460_66675  | cgttgctaattgtcgggtgtaactggXatcgtgttcatatcacaataaccgacag        |
| Gallibacterium anatis        | NC_015460_73777  | ccaatgcttccgattagcaatagtcgggtXaaatattcatttcccgaacacgcgctg      |
| Gallibacterium anatis        | NC_015460_7586   | gtaagttctcgaatgcgttgattgtccaXaccgttctaaccaactggtgctggttgc      |
| Gallionella capsiferiformans | NC_014394_25190  | cccgtaggcagtaactcggatgctgacgXaagccatcattgttccaacgtgacgttg      |
| Gallionella capsiferiformans | NC_014394_33496  | gcagcatcgtcagaaatcggattgctgaatXatgcgttctggttagtctgccaggtgtg    |
| Gallionella capsiferiformans | NC_014394_37196  | cttctgtggtcattctgtcagcatagcXaafttaaccagttgagggcggctcctaag      |
| Gallionella capsiferiformans | NC_014394_51116  | caacacctcagagctgacatgatcataXgatgtccgctgagatgcgagcatttcgag      |
| Gallionella capsiferiformans | NC_014394_86580  | cacgatctcccttagctctttagaatcXcggccgcatcatcaacaattcgacgaagg      |
| Gallionella capsiferiformans | NC_014394_98325  | caggtatttcggcgttcttgatagctttXccggctatctgcaaccatgatgcaacag      |
| Gardnerella vaginalis        | NC_017456_16348  | cttagagcctgtacaacaacgcgaatggcaXtccataatgtctacgcgaacgttggcgg    |
| Gardnerella vaginalis        | NC_017456_23621  | cgtgtgaagcgtaacagtccgggaagcgXggcaacttctcattgtaaacgcgctc        |
| Gardnerella vaginalis        | NC_017456_31127  | gtttcgaccagaagttcttcccaatcgXaagctgtaaggcttgaaggaaacttggc       |
| Gardnerella vaginalis        | NC_017456_40942  | gccccactcgaccttctactacatcgXtcaacaatcgtctcaataatccgcgtcc        |
| Gardnerella vaginalis        | NC_017456_47947  | gccaactataaccgtagataaaccggaaXgaacgcgtctgaagtgataggcacagatc     |
| Gardnerella vaginalis        | NC_017456_4824   | cgctttacggctgctgcccgaagtaggXtttgtgatcgatggtcaattggagcatag      |
| Gardnerella vaginalis        | NC_017456_57494  | ctggacctgaaatcattggcagggcagcXcggaaagcgtgtacaaataactataaacg     |
| Gardnerella vaginalis        | NC_017456_6      | ccggttgcgccataatgacttctaagcaXaagccgcatagtatgtctaactctcg        |
| Gardnerella vaginalis        | NC_017456_9532   | ggtttggttcattccaccgagcgtcagcgcXatggctaaactgaaatcactctggtgcac   |

|                           |                  |                                                                |
|---------------------------|------------------|----------------------------------------------------------------|
| Gemmatimonas aurantiaca   | NC_012489_106858 | gagtgtagagctgagctgatactcgccatXggtcaggtcatcaggftcacctgcaatcc    |
| Gemmatimonas aurantiaca   | NC_012489_128236 | gttgttctgtgcccttcgtgggtgatcagXccggcgccctcgattgcattcacatcattg   |
| Gemmatimonas aurantiaca   | NC_012489_133719 | gcaagcctcgtatgtaagtgcacgcacaXaagatggcctatctcgcagcgtattgcctc    |
| Gemmatimonas aurantiaca   | NC_012489_144858 | gattccagacgctttggatcgtaatctctgXaatgtcgcgagatagagcggcaggcatctg  |
| Gemmatimonas aurantiaca   | NC_012489_145901 | cgatcaagtacatcctgtcagggatccXagcacagcgcagctgtgcaactcttcaag      |
| Gemmatimonas aurantiaca   | NC_012489_154184 | gtcccggtattgaaaggatgtcgcgttgatXtcgggtatgctttcgcgagccatgtcacc   |
| Gemmatimonas aurantiaca   | NC_012489_26405  | gcatgtggtgtcgaagagtgcaatactXcgaagcctgcaatggagacagtggtctac      |
| Gemmatimonas aurantiaca   | NC_012489_4504   | ctctcacctgtggagatgtgtaactgatgXctgtcgcgtcgaataacgtctacacatc     |
| Gemmatimonas aurantiaca   | NC_012489_46733  | gtctgggttcatcatggacctgtcctggtXccatgcaggtctttctcgaatgcgagaatg   |
| Gemmatimonas aurantiaca   | NC_012489_80922  | gcatgtgcactgagattcgtcattcctXcgggtgaagctgcacaaacgcgttgaatcc     |
| Gemmatimonas aurantiaca   | NC_012489_87     | ggcatgctgaaatcagcgtgaccacaccgXaccaccggatcaagatgtcgttcaattcg    |
| Geobacillus sp.           | NC_014650_10445  | cttctacttcaatcagtggtgtgctgXgggctgttacaggtaaagacacagctgcac      |
| Geobacillus sp.           | NC_014650_21179  | ggattaagatgatcagctgaacgattaaXtccatctccgcaaatgccacagtggtcg      |
| Geobacillus sp.           | NC_014650_21507  | gtatccattgaactggccacggtagctcgXctgatgagacaacacggatatacaaaagac   |
| Geobacillus sp.           | NC_014650_21567  | cgcgtcgcattattcagacagaagcgcgtgXtccaacatattatcgtcacttgcgatcac   |
| Geobacillus sp.           | NC_014650_80121  | ggtgtcattggtgcaccagcatagccgatXcaacattgacacatttccgctaaagc       |
| Geobacillus sp.           | NC_014650_80145  | cagcgtatgctacttctgcacttctcXgcggtcatgctgcttaatgccaattcttg       |
| Geobacillus sp.           | NC_014650_80981  | gaagatggcggctttatccaatgctgcgaXtcgctatgtttcattagctgattagcgc     |
| Geobacillus sp.           | NC_014650_84019  | cgctgacgtgctcgtatctcaaccatgXtcgggtgtaggtgtgacaccagcacatag      |
| Geobacillus sp.           | NC_014650_85485  | caattgttgattgcagatcgccattaatXcccgtcaacattgcccctccggtggcaatc    |
| Geobacter sp.             | NC_014973_105019 | ccagggtattgaggagcacatagggcccgtXttaccatcgagggtactccaggtgtacg    |
| Geobacter sp.             | NC_014973_115094 | cctcctctattgagtatgtagtactggXctgcggatcatcgggtgctgctcttccac      |
| Geobacter sp.             | NC_014973_123259 | cacggcatcctcagtgacctgaaatctgaaXatctacctcgcgttgggcaacctgaaact   |
| Geobacter sp.             | NC_014973_138806 | ggacgcacgtgcacaaagaggtggcgaatXattgtcgtgatcaacgacaagactaccacc   |
| Geobacter sp.             | NC_014973_14682  | catctgaaggtgaaaggtggtgcaagaXataaagggtgactgcatggaacgcaacgaac    |
| Geobacter sp.             | NC_014973_155999 | gcacatccttgtgtccattcgcctctacXctgctcatggcaatcgcgggtgtattcgtc    |
| Geobacter sp.             | NC_014973_166009 | gggcttaagtgtggcgttgaattacgtXtggcgttgaattacctcggcgggtggc        |
| Geobacter sp.             | NC_014973_175766 | gatctacaagtcgtttaccgcgatgcacaaXgtctatcgcgatgcacaagttatcgaccgc  |
| Geobacter sp.             | NC_014973_20933  | gtatagcgaatcccgtctattgtgcacagXgaactatccgttggctgaaattcgtcgc     |
| Geobacter sp.             | NC_014973_40378  | gaacgggtcggcgtgagaatttacggttaaXatccggcacagaccactacttgagcacatc  |
| Geobacter sp.             | NC_014973_53246  | ggccgtattcctggcgttgccttcgatctXgctcacaacatccaggaatcatagtggc     |
| Geobacter sp.             | NC_014973_712    | ccgtctgcttcaccatcgccgtatacacatXactacgtatcaacctggtgctttccgctg   |
| Geobacter sp.             | NC_014973_88231  | ctgctcgggttaaacggccttaccgttctggXaacggcttaccgcttgaataaacggcctg  |
| Geodermatophilus obscurus | NC_013757_122701 | gaacttgacgaaatcctccgtttatcgaXcccgttccgggacatgtagctatagcgaag    |
| Geodermatophilus obscurus | NC_013757_169807 | cactgtaaccgtgagagatgttactgataaXgggtccgaacagcctaaccggtcgggacgac |
| Geodermatophilus obscurus | NC_013757_24609  | ccgacgcccttctaagatctctatgcgtaXcatgtagaactcgcggaagtttaccctcgc   |
| Geodermatophilus obscurus | NC_013757_52154  | ggcctcgtgataatctcctcctctctXctcaacctctacacctgaagcattatcg        |
| Geodermatophilus obscurus | NC_013757_52190  | caattatgctctgatcgcctcagccctXtcagtcagaacagcaacgtagcacccctaac    |
| Geodermatophilus obscurus | NC_013757_52269  | cctcaagatcaacttctattagaggtgcXccactcaacatcagaggtctgtatccctgg    |
| Geodermatophilus obscurus | NC_013757_88868  | ctcagcgtcatggtcctgtgctaccgtaXcagttcttcgacctgttctgatcttctg      |



|                                  |                  |                                                               |
|----------------------------------|------------------|---------------------------------------------------------------|
| Geodermatophilus obscurus        | NC_013757_90056  | gaccctcggggcgagatgagggtgatggcXtactaagaagacattgcattagtgtgtgg   |
| Geodermatophilus obscurus        | NC_013757_95591  | gaacatcgaatgtgcaatgtcgaacacaagXtgccgactgcttgcctcggttatggacc   |
| Glaciecola nitratireducens       | NC_016041_113664 | gtttacggttgcatgggattgggtggcggtXcatgaccactaccctcaagtagtcaactc  |
| Glaciecola nitratireducens       | NC_016041_119972 | caatcattatccaacgcccaatgcttgaXtagcagcgtttgccgcaacgatcactc      |
| Glaciecola nitratireducens       | NC_016041_19567  | gaatagctgggtcgtgttatctgttcaacXtagtaatgctcacgggtctgtgtgtctgg   |
| Glaciecola nitratireducens       | NC_016041_28342  | cattcaaaggctcaaatgtgaaagtaacggXcgcggagtttcgccgattactgtgtggg   |
| Glaciecola nitratireducens       | NC_016041_69009  | gcatctaataccggctctaaggatggtgtXcccgtctatcattataacattgccttgc    |
| Glaciecola nitratireducens       | NC_016041_80     | gattatacagctgctactttaccagcgcgXgatgtcatcgccttgccttgcgacgctc    |
| Gluconacetobacter diazotrophicus | NC_010125_103116 | cccgtgtagcggataatgcatgggtccatXttctgttcgcttgcgatcctccaatcatg   |
| Gluconacetobacter diazotrophicus | NC_010125_121557 | gatcctacagaagcagatgcacgtgaaacaXaccttctgccttctcaccggaccacc     |
| Gluconacetobacter diazotrophicus | NC_010125_125899 | cgacttctgtcgtcgtgactgcctcaacaXtccctcataactgcgtgatgaattcagcc   |
| Gluconacetobacter diazotrophicus | NC_010125_131376 | gtgtacaccggaattctgacacatagagaXaacgtggtaagtctcagcgattggcgcg    |
| Gluconacetobacter diazotrophicus | NC_010125_30711  | gtattgaggctccgattgacgccgtacagtXaagttgaatccgggtcggctacaccgattg |
| Gluconacetobacter diazotrophicus | NC_010125_36191  | ggttcgattctgaaagaatgcagcggatggXggaacatactgtgtgtggctctccctg    |
| Gluconacetobacter diazotrophicus | NC_010125_43124  | gcgacctgtctgttgaacaattgtatcXgggtccggctcggctcaggattatggcgc     |
| Gluconacetobacter diazotrophicus | NC_010125_5359   | gattctcggccagccatcgaagctgcaaaXagcgttaacggcactagattcgggaaac    |
| Gluconacetobacter diazotrophicus | NC_010125_56333  | ggtgacagttcggccgatggtgatggaaggXcggggaatggatgacagatactttgatc   |
| Gluconacetobacter diazotrophicus | NC_010125_64788  | cttcaccaccttccgctgacctctgccgXcccgagaagacgaatcgtttacattcatgg   |
| Gluconacetobacter diazotrophicus | NC_010125_81716  | cgatcaggctagaatgaacctactgagatgXtgctactctgttgcctatccctccgaag   |
| Haemophilus influenzae           | NC_014922_16877  | ctaacggcaagtgttcttatgctgaaccaXaacgtgcttgcctattcgttatgcttggg   |
| Haemophilus influenzae           | NC_014922_27861  | ctgccgactgatagcctgtattagtcgctgXtcgctgccgactgatagcctgtattagtcg |
| Haemophilus influenzae           | NC_014922_32971  | gtaatgggttactgtcgtcccaccgtgaaXatgatcttaggcaactcggcgttagcagc   |
| Haemophilus influenzae           | NC_014922_33339  | gaacaagaccgcagattcccttcgaagtXtagacgctattaacgtatctcgtctgttg    |
| Haemophilus influenzae           | NC_014922_46225  | ctcttggctctatgctggtatataattaXcgcattaatagctgtcagaaatccggcg     |
| Haemophilus influenzae           | NC_014922_47187  | gtgggattatccattcagtcacgttcccXatggtgctgagttatataccgtagcagtc    |
| Haemophilus influenzae           | NC_014922_47446  | cgttacctcaggaagaagaacagcaatacXttgagcaatttggcgaagcaacgcacggtg  |
| Haemophilus influenzae           | NC_014922_55900  | gttctaaccaagctaccttatctaccgaXtggtgtatttctcgggtcgtgtcttggc     |
| Haemophilus influenzae           | NC_014922_56544  | caagggtgtaagggtcgcacacaaactaacXttatctactggcgatttagtctgtaacc   |
| Haemophilus influenzae           | NC_014922_58004  | catttggcaagtgaggttaaatagtagcaXgtgcgggtgattgacattggcactggctcgc |
| Haemophilus influenzae           | NC_014922_60985  | gaacgcattatggaaagatgcttgaccagXaacagcatcatgtttacgagcttgagcac   |
| Haemophilus influenzae           | NC_014922_61502  | ctgccctgctgttgcaccgttaataacagXgcccgtcgttgcggtattaggaagataagg  |
| Haemophilus influenzae           | NC_014922_61604  | gtccctcttggcggcaccgtaacattXacgttatttactgtattattgtcgatggc      |
| Haemophilus influenzae           | NC_014922_65202  | caaggcgttctagtcggcgatgcaatttctXttaacggagctgatgagcgggtgcttgtg  |
| Haemophilus somnus               | NC_010519_21194  | ctcggagggtatattattgtcagagccatXctaataaccgctgctcggctatccctcctg  |
| Haemophilus somnus               | NC_010519_28738  | gcagacaacggtaacctgttctcaacatcXgatctgatttgccttagtagaaccgtg     |
| Haemophilus somnus               | NC_010519_2944   | cgatcctaaagcagttgcttggccttccXaataagaagcaataaccagcagcattacgfc  |
| Haemophilus somnus               | NC_010519_32586  | ggcgggaagtgggtcaaatggtgcaactggXcacctcgatttcttaaacgtggaagtac   |
| Haemophilus somnus               | NC_010519_34438  | ctcgcacttgcgttcaacggcatacactcaXgcaactgaacaaccttgcgagcaattgg   |

|                             |                  |                                                                |
|-----------------------------|------------------|----------------------------------------------------------------|
| Haemophilus somnus          | NC_010519_354    | ccaactattggatattgaaccgtggcgtaaXggatttggtggaggcgggtactaaccttgc  |
| Haemophilus somnus          | NC_010519_39023  | ccgcctcgccattgcgtaaagcgttccttXtgccctgattatctgtaataacgaccgttc   |
| Haemophilus somnus          | NC_010519_43549  | ggagcctcatgataagtaggcgtttgcaccXaacaacggtttatataccgctttacctcc   |
| Haemophilus somnus          | NC_010519_44647  | gagttattggagcgtacagctgaaagcgtatXtcacgcatagcggcaaacgggttccaaccg |
| Haemophilus somnus          | NC_010519_62533  | gtaaccatgctagagccttagagattaaaXgacgggagaacgtttgaaatgctgagggc    |
| Haemophilus somnus          | NC_010519_68218  | cacctcaaccggcgatttcgggtggtgtXtaagattatgctgaaactacacggcaacag    |
| Haemophilus somnus          | NC_010519_8488   | cggtgactttccagaaggagctgtctgcXaataggcactatctgccagcctgttgatg     |
| Hahella chejuensis          | NC_007645_199724 | gcgctctcagccaagtgccttcgcccagcXttaccagtggtgatacaataaacagggc     |
| Hahella chejuensis          | NC_007645_213858 | ggcacatcttaatagaggcataagtatctXcgttgcaacggcgtccttaccagaagatcg   |
| Hahella chejuensis          | NC_007645_228292 | gtcattgccgttgaaagtcattcagctgXatcggcttccaccacttggcgttgatg       |
| Hahella chejuensis          | NC_007645_26144  | gaccgaagttgatcaagacggcggcaatgXtgggcatcgcgtagattgctgttatacg     |
| Hahella chejuensis          | NC_007645_38788  | gtaagaacctcaatgccatttccggccgXccagatgtgaaagatagaggcgttgac       |
| Hahella chejuensis          | NC_007645_63918  | gggtgtctctgcagacggcttaacactXaatgcttcaagtcggatcagagacttctc      |
| Hahella chejuensis          | NC_007645_74     | cggagcactccctaagttagaggagaacXgtagccatttcatattgtccacattgccag    |
| Hahella chejuensis          | NC_007645_74424  | gcggaattgaagcatagcagcagcgttgXgcattggaagcattgtaagcgaacgaacg     |
| Hahella chejuensis          | NC_007645_88295  | cgtcttccgatattctgaagttcggtagagXgagaagcggagcgttcaacaacgttgagc   |
| Halanaerobium praevalens    | NC_017455_39372  | gcttgtgcctggtccgttaggaactggcgXattattgcacataacgttactgggatttgc   |
| Halanaerobium praevalens    | NC_017455_43316  | caatcccaagcttcacaggtgtctccaaaXaggagtttaactgggattctctggtgttc    |
| Halanaerobium praevalens    | NC_017455_50816  | cttgtgcctgattccttaggaactggcgtaXtaatttcggctaacgtccctgggatttgcg  |
| Halanaerobium praevalens    | NC_017455_50848  | ctgtttccacaggaactggcgtaaacgttgcXacataacgtccctgggatttgcgctgtgc  |
| Halanaerobium praevalens    | NC_017455_51074  | ggatttgcgctgctgctggttccgttaggaXtttaagttgattgacataacgttctg      |
| Halanaerobium praevalens    | NC_017455_71000  | ctgtagttaggccttgaccattgcgtccaXtaacaatagctgttacttctcagcttgac    |
| Haliangium ochraceum        | NC_013440_146189 | gctctgctgctgtgaaccaagcgggcatcgXgatttccgatgaagacaatcgatttgcac   |
| Haliangium ochraceum        | NC_013440_175368 | gcaaacctcgcactatccgtacaccgattXcctctattcaggcggcatttgacgagac     |
| Haliangium ochraceum        | NC_013440_198323 | gtgctgccaatcacattcggaaatctctcXatatccatatagttcccgcacgccaccgtg   |
| Haliangium ochraceum        | NC_013440_223338 | cgtcgtttccacgaccaacagctggtggcXcaaatcggtagcaagggtatattcttgac    |
| Haliangium ochraceum        | NC_013440_25116  | cttgcacgtttcttccgagcggagcccXctttaaagcaacaatgttcaatagcaag       |
| Haliangium ochraceum        | NC_013440_283724 | gtctacactatggagagccgatacttctcXggagcgaattgcgacgtatgtctatttc     |
| Haliangium ochraceum        | NC_013440_295124 | cgtggcggaaagcgaagacggctccgggtcXtattcccgaacctgcaataaattcattgc   |
| Haliangium ochraceum        | NC_013440_312462 | gatccccaaaaggccagcctgattgaatgacXgacctaatctcacctatcggcgatcaac   |
| Haliangium ochraceum        | NC_013440_32992  | gccatgatatcgccatattctgaatctcgXgacattgtcccctgcaagcgaagccgttg    |
| Haliangium ochraceum        | NC_013440_47662  | gatgttctgtggatcgttgaactcgggtgcXacggctggtccacttgcgatgatagtc     |
| Haliangium ochraceum        | NC_013440_89533  | gtgttcttctgatatcgaatcattcgcaXccactattgtcttctcgtcgtggcatg       |
| Haliscomenobacter hydrossis | NC_015510_103934 | gcggtaccgatttggtagccacacgttgcXcattggaactatagatcacccgactgaatg   |
| Haliscomenobacter hydrossis | NC_015510_14522  | gcaacatcaatgcgaatggtatcaacccttXgtcagggaagccatcaagactggtattagcc |
| Haliscomenobacter hydrossis | NC_015510_153222 | cgccattgtgtagatttctcggacctgatXtatcgaattgaacaggtgattgaccgtcg    |
| Haliscomenobacter hydrossis | NC_015510_278976 | ctccgatttgccttgaacatggcgatggtXgtcttcgctaccaattcagatagctttag    |
| Haliscomenobacter hydrossis | NC_015510_30097  | gggcagcagcatttggctacattctctXaaatgtcaatattcggccctaccgcttgc      |
| Haliscomenobacter hydrossis | NC_015510_46969  | gccataccgcgatgttcaggtgcatatggXcttaccaggtgttacatcaatcaacttg     |
| Haliscomenobacter hydrossis | NC_015510_76839  | gtaacctcagcaaaacccggattccatXatctgatcgtggtgtacgtgacgagtgctg     |

|                               |                  |                                                                |
|-------------------------------|------------------|----------------------------------------------------------------|
| Halomonas elongata            | NC_014532_1095   | gcctggcgactgttcggctatgatcatcXatcgggacaatgtgattcgttcagcgatg     |
| Halomonas elongata            | NC_014532_125176 | cgaggccatgatgatecaacaggcttgacctXtgataagccacaaggaacaatcagtgacgc |
| Halomonas elongata            | NC_014532_22060  | cactcgcgattcatgctgacaaaggaagXagactgcatcatgagaacgcgtgcaatggg    |
| Halomonas elongata            | NC_014532_39935  | catgaaagtattgcacattgtttgcctattXgttcggaacgtagtgctgcgccgtgctgg   |
| Halomonas elongata            | NC_014532_62683  | cctgtagtctactcgtccatacctcgcaaXgaataggcgaagcttctgtgtaccacg      |
| Halomonas elongata            | NC_014532_6925   | cgatgacgcacatcgaatactcttagtaXgcaagctcgggacgagctgcgtgcaaac      |
| Halothiobacillus neapolitanus | NC_013422_16454  | cgcgccatgtccggttacattgacatcactXttgcctgatgaagataattcaggcccgatg  |
| Halothiobacillus neapolitanus | NC_013422_24172  | gttactggtgaaaggcatgcccgaataacctXctcggcgatggagcatgctggatgaaacc  |
| Halothiobacillus neapolitanus | NC_013422_3      | cgattcggtcagggtcagtggtacactgacXccggctaaattctgttcagtgatactg     |
| Halothiobacillus neapolitanus | NC_013422_33165  | gtgccttgttcctgtaactgttcgtgcXatcaagaatggaagcagagcctgacatcg      |
| Halothiobacillus neapolitanus | NC_013422_37375  | cttggtagcggccgttcagccaactctgaXtaccttctgggtattctgtatcgtatgg     |
| Halothiobacillus neapolitanus | NC_013422_4809   | cattggtggcaaccggaacacagcgcgcaaXtttgaactaatcgtgaagccaccgaaactg  |
| Halothiobacillus neapolitanus | NC_013422_51343  | cctgatcagcgggttgaactggaatttXtaacctgcccgaattcactctgatcgcgc      |
| Halothiobacillus neapolitanus | NC_013422_61400  | cgcttcaaccagatcatgagcttgcgtgtXgcgacaattcgtcgggtgctggctattg     |
| Halothiobacillus neapolitanus | NC_013422_85965  | ccatgattccttgatgctgcgcgaagtXtgaactgaccctccctggattgataac        |
| Herbaspirillum seropedicae    | NC_014323_116432 | gtaagtcgcttcaagatcttgcagcattXatcgtagtaccctgccagccgctttg        |
| Herbaspirillum seropedicae    | NC_014323_137511 | ggccaataaatcgatatttaggcaagcttcXgaggagtgtcatgataggcagccatccc    |
| Herbaspirillum seropedicae    | NC_014323_155964 | gtgcgcagggcagtgctgaatcgtctctgaXactcgttgacgcgcttagacctatttg     |
| Herbaspirillum seropedicae    | NC_014323_170268 | cacgatagatgattggtatcggcatgagcaXgggtcgtctgctgacgcgttcgttatc     |
| Herbaspirillum seropedicae    | NC_014323_183724 | gtgtctctcctcctctttaggaagatXgattcgtcaacgcgtcaggacaccgatcc       |
| Herbaspirillum seropedicae    | NC_014323_24078  | gaaattcaatccgcaagtttattcattcXttctcgtcggctgacgtgctggccacc       |
| Herbaspirillum seropedicae    | NC_014323_36416  | ctgagcaagattgttctctgcatcaacaXtgtaaagagcaatggcaggtacgcccgcgc    |
| Herbaspirillum seropedicae    | NC_014323_46042  | ctcgttcaactcaatgcgctgaccatttcXtcaggaccgaggttctgcccnaatcgc      |
| Herbaspirillum seropedicae    | NC_014323_8454   | gtccacaagttgaagacctgctcagagaaXgattgaccttccacgtaggcctggcgc      |
| Herbaspirillum seropedicae    | NC_014323_92319  | gtagctacggcgtgcttctatgactttXtggacgtatccaaagctgctgactacg        |
| Herminiimonas arsenicoxydans  | NC_009138_102364 | gatgctgttcgctttaaaggcgcgataacaXgatgcaatcaaacgtttccgggatgacg    |
| Herminiimonas arsenicoxydans  | NC_009138_114048 | cgctcgcagggatgaacctgtctgcaccXgtttacaagtcgagataggttgatgacg      |
| Herminiimonas arsenicoxydans  | NC_009138_15654  | ccaacgtaagggcaggtttcaggaacagXgtgacagcaaacgtgatacatcattg        |
| Herminiimonas arsenicoxydans  | NC_009138_4      | cgataacgacttgatgaataagcgcctggXcacttagcacaattgcgactctgcctgcc    |
| Herminiimonas arsenicoxydans  | NC_009138_50407  | gtcgcgaaagcatctcgatacgggaattgaXcctcgaatcgatcaggactgattcggcc    |
| Herminiimonas arsenicoxydans  | NC_009138_61580  | gtgatgcgataaccctataaatcacttcXgattcatattgcgctccgctgtgctggc      |
| Herminiimonas arsenicoxydans  | NC_009138_73819  | cagctactccaagaactggagatacctcaXgacatcgtggagaagctggaattcagcg     |
| Herminiimonas arsenicoxydans  | NC_009138_81923  | ctttaccagcgtgtgtataacacgcccXaggcgatcacggcaacggttgatggaatgg     |
| Herminiimonas arsenicoxydans  | NC_009138_87160  | gcaggtaaacgatgcccagcagataagcgcXgtcattctatcatcacgctacaaccgg     |
| Herminiimonas arsenicoxydans  | NC_009138_95168  | catcacctcgatcgaataattcagcgcXttcggcagttctgtgataagcgtcctg        |
| Herminiimonas arsenicoxydans  | NC_009138_9592   | ctggcgacctgttccgctgagttcgtaaXtgaatgattgatgcagagagtgctgctg      |
| Herpetosiphon aurantiacus     | NC_009972_117498 | catagagcattggagttggccaatcaaccXgggtcatgctgttagctcagtttggcgac    |
| Herpetosiphon aurantiacus     | NC_009972_128482 | caagaatgcccctggtgataccctaaccXgcgattcggctggttaggcatggtgcac      |
| Herpetosiphon aurantiacus     | NC_009972_164123 | ggctagttgaccaaacgacctgatcgcgXaataccaccaaatcaagggcggtatcacg     |
| Herpetosiphon aurantiacus     | NC_009972_179079 | cgttgagccaacaacgcttgtttcaactXatcagcagcacttctgagttgtgtgag       |

|                              |                  |                                                               |
|------------------------------|------------------|---------------------------------------------------------------|
| Herpetosiphon aurantiacus    | NC_009972_21060  | ctagatatccctgtatcccaattcaciaaaXaccgcgtcaacaggggtctctatactgcc  |
| Herpetosiphon aurantiacus    | NC_009972_44039  | ctatgtaatcctaagcctgctggcagcacXgaagtggtccaaggcctctccaatgg      |
| Herpetosiphon aurantiacus    | NC_009972_86329  | cgtttgacgtcacgatcattgaacaccgatXgcacaccagttggacaactcttgatgccag |
| Herpetosiphon aurantiacus    | NC_009972_95843  | ggcttagatgccaatggctgattgagatgXggtacattgggtcaatgctgctggcgac    |
| Hippea maritima              | NC_015318_19305  | gcccgaagaggcgatgaattgcaagaXttgccaagattcccgtattggaacctcag      |
| Hippea maritima              | NC_015318_195    | ggcgatagggctttaatatgcttatgggtXctgcaggttacgataagtgatgctgaggag  |
| Hippea maritima              | NC_015318_22791  | ctatagactgtagagccgtatcatcatgXcgtgttctccatagcgtttacccttg       |
| Hippea maritima              | NC_015318_2368   | gcttaataggccttggccttacgggttagXgctctgcaagttcttagcgtgttggtg     |
| Hippea maritima              | NC_015318_33579  | gaacctgaccttctgtctgttggcgagXtctccaccttctgttgaacaatgaagg       |
| Hippea maritima              | NC_015318_46854  | cgcggtgaaatatctgctgttgagattgccXgggtaagccgatctgttatcagctcaac   |
| Hippea maritima              | NC_015318_50133  | cctatecctaaaggcttcattaccgtcacXacaagataggtgtgttagccgcagaagc    |
| Hippea maritima              | NC_015318_7725   | ccgcttgaatgtaaagatgatccttggXtcttggcaagcctgtttgacgattgagcg     |
| Hirschia baltica             | NC_012982_107508 | cctcacaatgaccgcacaatattgcagcaXgggatgatccgatagttgattggccg      |
| Hirschia baltica             | NC_012982_115062 | cacgtctgctgggtaccgtatggaaggacXtgcctggatggctggaatgtaatgctcc    |
| Hirschia baltica             | NC_012982_11545  | gtttaaagttgctatccattatcgctcatcXagctatggcgacgtgcttggcgaccggg   |
| Hirschia baltica             | NC_012982_15838  | cattaataaccgatcacgccgctctggatgaXggctgttgatatacaccgctcattggg   |
| Hirschia baltica             | NC_012982_21839  | cgcttatggccctattccagtgctaaatXcaggcttgtacgcctaaagcaaatcatcg    |
| Hirschia baltica             | NC_012982_31646  | gtttccgtggttctaaaggtacatataccXgattgaactggcgattatcccgcagtac    |
| Hirschia baltica             | NC_012982_37378  | cgttgagaacctgtactgttccaatgcaXgctgatgagtgctagaagttatccggac     |
| Hirschia baltica             | NC_012982_58110  | gctgaatcaaagttgatggttcggcgtggXcatcgggattgaaccgatttctagcagac   |
| Hirschia baltica             | NC_012982_6049   | ctgattgtttaaagactgttgcaaltggcgXctgccatcaactgtaccagcatcaaaagc  |
| Hirschia baltica             | NC_012982_65886  | gtgatccattgggactaagtagtattcagXagcgcgatctctcattgagcagccaag     |
| Hirschia baltica             | NC_012982_89485  | cataaacctctgtctcataatagacagtcgXctgaacgaccttctgctgagagacgtccac |
| Hydrogenobaculum sp.         | NC_011126_10333  | gagcccgctcatttctggatgtggataaggXtactggatgcacgtaccagaagcgtattg  |
| Hydrogenobaculum sp.         | NC_011126_25547  | gcagccactacacctttgatgtaaatctgXgggaccatcacctttaccgtcaccctg     |
| Hydrogenobaculum sp.         | NC_011126_28223  | ccttctgccgttctctaaagtgttggctXtcaagatgtccaacgcagtgtccatttgc    |
| Hydrogenobaculum sp.         | NC_011126_29219  | cgccgtaagttgcatctgttggagttatXttggcctacgcttaccacataaacaccac    |
| Hydrogenobaculum sp.         | NC_011126_34382  | cgcccgtcctgttataagagctgggtgagXatgagggttctagaagccttatatacgac   |
| Hydrogenobaculum sp.         | NC_011126_39202  | caccaaccctcataggcacagaaggtactaXaggcaatggaaggatcctaccgccaatag  |
| Hydrogenobaculum sp.         | NC_011126_40420  | ctatcgtcatctcccttgcaagaaccgXtcatcataagtgtggcctctgccaagaag     |
| Hydrogenobaculum sp.         | NC_011126_46416  | gctaccgtcaaatccaaagcgttgtgctXgctttgacggttccctgatgaggtctgc     |
| Hydrogenobaculum sp.         | NC_011126_4746   | gttgccactcatacacatggctatagcatXtcccaccgactggactgtagaaggattg    |
| Hydrogenobaculum sp.         | NC_011126_48719  | ctaaggaacagcgttaccatgtcaagctXacactagagcgtgcaatgcgcttctgatg    |
| Hydrogenobaculum sp.         | NC_011126_51550  | ctatagacgctgagctccaagagagaaacXaagaccagaccgctattgtagacttagtc   |
| Hydrogenobaculum sp.         | NC_011126_7272   | ctgatagcgtctagtgtgccgatgggcatXgcttctgttctttagcttgaacgcg       |
| Hydrogenobaculum sp.         | NC_011126_9384   | cggatgtaagacgtgttcaactttatXggccagatccttggccttgggaatgtg        |
| Hyphomicrobium denitrificans | NC_021172_105828 | gctgtagcggcttcgagcgcagtagagagXgatgctcaggttcttagctgattgtaac    |
| Hyphomicrobium denitrificans | NC_021172_35706  | gccgggaattacgtcgggtatctgaattcXccagctattcggctatcagaagcaagcgcc  |
| Hyphomicrobium denitrificans | NC_021172_52345  | cgctatcgacgcaggttgatatagctacaXaagaccggcgatggttcaatttcggcc     |
| Hyphomicrobium denitrificans | NC_021172_57797  | catttgcgcttgatacgtccctctgcatcXgaagcgacaatctggcgatacttgcctg    |

|                              |                  |                                                                |
|------------------------------|------------------|----------------------------------------------------------------|
| Hyphomicrobium denitrificans | NC_021172_64692  | caggcgcaacgcacggctaagctcttgaagXttctttgtatttgaggcatgcactggcgg   |
| Hyphomicrobium denitrificans | NC_021172_77669  | ggtaactccgctccgcaaacgtccgataaXttgagttgttcgggtgaaagcgtcagacc    |
| Hyphomonas neptunium         | NC_008358_103542 | ccgtacattctgacatgagatgattctcXatttcgagccgacggcggttggacatgg      |
| Hyphomonas neptunium         | NC_008358_110535 | gaggcgagttaaagttgaattgctctcXagctgccttaagacctgattaagatgtccc     |
| Hyphomonas neptunium         | NC_008358_13996  | cgtgaggtaaacgggttacactactcaattgXtgaattcaaaggactgtctcgcgtgagttg |
| Hyphomonas neptunium         | NC_008358_27550  | cagtgccagtcctcatcttccagaacgttXgcagatgcgcttcaactcagttccgacttc   |
| Hyphomonas neptunium         | NC_008358_7229   | gcaatatgcccgataattattcgcgacXgaaatggtattgtaccgtttctccggcg       |
| Hyphomonas neptunium         | NC_008358_75472  | cacggagttatgtcgacatcgtgggtatataXttactactaccactactcttgcgtgacgc  |
| Hyphomonas neptunium         | NC_008358_79691  | gaacggatgcccaaggacattctctcatcXctgacgcgcaaatctttccatccctccgg    |
| Hyphomonas neptunium         | NC_008358_89421  | cattgtccgccatacacttcatgaatataXcgcagatccggcggtgaaatcccgcctg     |
| Ilyobacter polytropus        | NC_014632_11319  | gctatgtcagctgtagcgtctttaggtXgctatgaacggacgtgcagaggcagctctg     |
| Ilyobacter polytropus        | NC_014632_1638   | ccagtcctccggcatcttccaggaagtgtXtgaactgaggagggaagtgtgatcttcc     |
| Ilyobacter polytropus        | NC_014632_17640  | gtgccacgtcacttcaggatattgttgXgaggactggttctgtctgataaattatg       |
| Ilyobacter polytropus        | NC_014632_20129  | gttatctagcgtgaatagttccacaacXgaaggcaggagaaggtccacagaagagag      |
| Ilyobacter polytropus        | NC_014632_37638  | ggctcccgtctctacaaaggctcgacaaaXaggagttcttggaccaccttgggaag       |
| Ilyobacter polytropus        | NC_014632_42363  | ccgcagctccattattctgggacaaggtataXaagtcagcccttggaaactggagatattg  |
| Ilyobacter polytropus        | NC_014632_56046  | ctccgccactagagcgtccttgcctttacXagtgaccaatatacattctgtccctag      |
| Isosphaera variabilis        | NC_015588_96265  | gatgcacgaaatggcattcctatgtcaacXtgcattcgaattgacgtgcacaaatagag    |
| Isosphaera pallida           | NC_014962_140111 | ctttacaggtgggaacatgtttcagcttgcXtctctctgctgctgcttggcgtgccac     |
| Isosphaera pallida           | NC_014962_171012 | gaaccaacgggtcgatcagacgagatgctcXctcttgaccgtggttggagacactatac    |
| Isosphaera pallida           | NC_014962_182130 | gaccttcggtctattacaacatgttcatgtXgccaggaggtctggtctgcgcagactg     |
| Isosphaera pallida           | NC_014962_45294  | gcctctcgaattgatctgggaatgaatgXgtgacgcttgaccagcggcttaaacgctc     |
| Isosphaera pallida           | NC_014962_53851  | gctttgtagcgcgttgaacgcgatggtgtXttctttgaaacctgggtggaccttggaac    |
| Isosphaera pallida           | NC_014962_79433  | ccgacctgtgaaggttcacctcgttgcgaXctcgggttggaaatgtcgagacggattaag   |
| Isosphaera pallida           | NC_014962_89008  | ggttctctgggtagcttctcgagagagacXtaatatgacgattgtcaacacaacgccgc    |
| Jannaschia sp.               | NC_007802_109015 | gtgtttagcgggttcgcccttgcggXgcggtgaattcgaacagatcatatgatgg        |
| Jannaschia sp.               | NC_007802_137835 | cccttatgaatcatcaaggcttgggtctataXatccgcaatctgggtatgtacgtccac    |
| Jannaschia sp.               | NC_007802_143488 | gcacatcccgcggcattgttggagaatXactgattcttattacctgtaaatgaaggc      |
| Jannaschia sp.               | NC_007802_28208  | gcagcggctctgctcgaataactagttXagggaagccggattgtctgctgtaataac      |
| Jannaschia sp.               | NC_007802_49434  | cggcgaataacaacgcgatctattcgatXcgcagcgaccgcgaactgcgaatagattg     |
| Jannaschia sp.               | NC_007802_66994  | gatatctcgttgcgatccttgattcaggtXgttgaattggctagagctggccaccatc     |
| Jannaschia sp.               | NC_007802_76773  | cgatcagtccttgggttaagcgttcagXcgtatgccgggtctatccgttaacatc        |
| Jannaschia sp.               | NC_007802_8232   | ggcgacatgatgagcggattgccaatcatgXttcctgacgacacgccacaatagattgc    |
| Jannaschia sp.               | NC_007802_87122  | gttatctatgacaagatctgttctggtgXtccgccctcaatgctatcccgacctatc      |
| Jannaschia sp.               | NC_007802_93966  | gaacatcctgcttcttgataaatcgggtgXggcgcgaaattggcatgaaactacggctgg   |
| Jonesia denitrificans        | NC_013174_10006  | cattcgcatgcaacagtttagtggcgatttcXgaaccacgtgcacattgtcagctgtc     |
| Jonesia denitrificans        | NC_013174_27333  | cacgatcgaatcgttcttctcgcacacXgcaggaggcttcaatgaagaatcactcgc      |
| Jonesia denitrificans        | NC_013174_39236  | ggctccttgttgggtctcctcattgtgaXtgcctgcatcaaaattggcggcattattg     |
| Jonesia denitrificans        | NC_013174_41     | gtcagctcgtgagatcgtgtgaaggatcXttcgcaactgaaatggcaaccagttgatc     |
| Jonesia denitrificans        | NC_013174_47489  | cacattctcagttgatcatctttagtggXctcacaagggtgcgttaccattatagcgtgc   |

|                            |                  |                                                               |
|----------------------------|------------------|---------------------------------------------------------------|
| Jonesia denitrificans      | NC_013174_57563  | gacgtgaaaggactgtcatgacgtcaccXggtcagcagatggttgggtttaccaattc    |
| Jonesia denitrificans      | NC_013174_62485  | ctgtctacaccgctgatgcgctgggataagXacaatgtgtactcgaagcgctcagtcttg  |
| Jonesia denitrificans      | NC_013174_66795  | gtattgttgcggaaacctgcttctgttcXtgacgtaacgaggtgaacggcttctcaggc   |
| Jonesia denitrificans      | NC_013174_70959  | ctgggagtgctctgatgcgtgacgtggaatXctggaacgttctgtctcacacaggaactc  |
| Jonesia denitrificans      | NC_013174_80755  | gaaccgtggttactcctgaccacctcatXaccaccatgactgtcgtgatgcgcatgaag   |
| Ketogulonicigenium vulgare | NC_014625_22903  | ctctacaccgaatgcgctagtcgagaggtXactgtccctatacttcaactggttacggg   |
| Ketogulonicigenium vulgare | NC_014625_30278  | ctcagtggttatatcgtgttgaccacgggXacgatggaagacagacgatgcagcgattc   |
| Ketogulonicigenium vulgare | NC_014625_40050  | cgtgcggatatacttaattgacttacaXcgcgtagcgaccaccagatcagatggcac     |
| Ketogulonicigenium vulgare | NC_014625_50165  | cgctatacataaagatcgcggtgtaatacaXtcgcgatagtcggcggctgtgatggtgc   |
| Ketogulonicigenium vulgare | NC_014625_54330  | ggtaaaagtcgtgtctagcgtaaagccctgXatgaccgaccctctgtataatcgcaag    |
| Ketogulonicigenium vulgare | NC_014625_63798  | cagaaagtcgcataatagccaccggcttcXgcctagtgttcaaataccacgtcatctgc   |
| Ketogulonicigenium vulgare | NC_014625_6568   | gtaacgcaactttaagcggctattcagccXagcgggtcaggttagcgtcgagcgtttgc   |
| Ketogulonicigenium vulgare | NC_014625_689    | gccatcagggtcagaacacctcgcgataaXagataaagcgcataatcggcagtttgcgg   |
| Kineococcus radiotolerans  | NC_009664_108895 | gcgattgaggtgtcaatctctcgggtgcgXaacgaggtcgcaccttcatgtgttcccaag  |
| Kineococcus radiotolerans  | NC_009664_126771 | ctcacacgggtgatacctctagtgctccXctgatgctggcaacttccgtttccgggtg    |
| Kineococcus radiotolerans  | NC_009664_146506 | gacgttaggagagatcgtgtctctctcgXtgcgacgtaacaacgttagatcctacc      |
| Kineococcus radiotolerans  | NC_009664_150096 | gagaacatctaggctgcagcatcggtcagaXgtcgtgagggcagtcgcaatgaatgatcag |
| Kineococcus radiotolerans  | NC_009664_150133 | cagagctgttctctagtaagacgattXgtcgttctgctcagaaggatctcccggc       |
| Kineococcus radiotolerans  | NC_009664_20489  | gtgagaaccgtaagaacgttcccgggattcXcgaagcaatagcagttcaactatccggtc  |
| Kineococcus radiotolerans  | NC_009664_48161  | cgctcacaatggagatcgaactcaatgtaXccataaagtcggcgtctcgaagcattcg    |
| Kineococcus radiotolerans  | NC_009664_82001  | ccgtactgtaacgagacgtaccgactgaaXcgtattcatcgacaatatcggccggttgcg  |
| Kineococcus radiotolerans  | NC_009664_82282  | ctacaacaagctctgatccaggtcaagtXagcaccgtccggaagctctatgatcgg      |
| Kineococcus radiotolerans  | NC_009664_82844  | cgatcttgaaacggtgatggccgtagaacXttgtgaccaactacctctcgcgctcatc    |
| Klebsiella oxytoca         | NC_018106_101717 | gcttcaataaggtcgcacccgctacgggXagtaccagcgttaataactttctacgaac    |
| Klebsiella oxytoca         | NC_018106_122629 | gcagtttgggtattatacaaccgcccggcXttatgtctctgcaatgctggcaataaac    |
| Klebsiella oxytoca         | NC_018106_138560 | cggtatcgggtattgtccgggtcacctcgaXtcacaggaattgtaaggaaaggctctcgc  |
| Klebsiella oxytoca         | NC_018106_14173  | gctgaggcaatagtgatggccgatgagcgXcgtagctgtgataaataatgatgcgatcg   |
| Klebsiella oxytoca         | NC_018106_170080 | gtagctgatcaccgcagccaaacgtttXcgataatcgtcgaaagtttagggtccg       |
| Klebsiella oxytoca         | NC_018106_170267 | gatatgaacggcggcaatatgcaaatgccXgttattccgctggtgatggcattatctcg   |
| Klebsiella oxytoca         | NC_018106_170636 | cattatctatgacgatcgcgtggtgatgttXccagaatgtgatccccgttattaatcacc  |
| Klebsiella oxytoca         | NC_018106_200616 | gatataaccgatatgtacccattcttggXcaatggcactatgcatccatggaatggccc   |
| Klebsiella oxytoca         | NC_018106_28929  | gcaaaagctgtaataaccgaltaaaggtgXgtgtctcgggtatggaccgtttccgggtcg  |
| Klebsiella oxytoca         | NC_018106_84075  | gtaatgtatcgactgggtcatcgatggXcggatccggcgatcaaggaatagcaagcc     |
| Klebsiella pneumoniae      | CP_006659_107750 | ccgcaaacgacttgctctggtctgtctgXaatctatctgacggttaattctctgctgcg   |
| Klebsiella pneumoniae      | CP_006659_13074  | gcctttaaacttctgatagctcctcatcXttacgcgacatactctgctcatcccatgc    |
| Klebsiella pneumoniae      | CP_006659_155803 | ccagaacgggtttttaaagtatgacctcXacatcagccggcagcgtcatctacagccgg   |
| Klebsiella pneumoniae      | CP_006659_30883  | cgcgactaaagcgttaaagtcattgctgaXtctcgcgacgctattatattgtgacccg    |
| Klebsiella pneumoniae      | CP_006659_76376  | ctgcctgatagctcagttaaatcgtcgcXttggtgtaagaatccccggaccgtaatgg    |
| Klebsiella pneumoniae      | CP_006659_78117  | gcactattctttgacgacctgagattgXtgaccagtaagatccttgcattcattcag     |
| Klebsiella pneumoniae      | CP_006659_86759  | gaagaatgactgacgagatcgatagcgagcXtctgtattctttcaattccggcaggag    |

|                       |                  |                                                                |
|-----------------------|------------------|----------------------------------------------------------------|
| Klebsiella pneumoniae | CP_006659_91141  | cggaaagcaccgaatgaattctcctaaggaXagatccgtccatctttgtgtaccgccaggc  |
| Klebsiella pneumoniae | CP_006659_95142  | gacgccagcccaaatggttgcgcctcggXcgaagatataatcgttgatcgaggtaac      |
| Klebsiella pneumoniae | CP_006659_96777  | gatgagattatcagtaacgtcattccagcXgtgttggcggtgagcatgggctacagccc    |
| Kosmotoga olearia     | NC_012785_13304  | ctaactccaggcctgctatcggtcttatgXactccgagatcaaatctatctgtacgagg    |
| Kosmotoga olearia     | NC_012785_25803  | gctatcaagaaggcacaggctacaagggtXatcgctacacacaccggttgcgtgaac      |
| Kosmotoga olearia     | NC_012785_30618  | ggatcatccacatccaaccttccatagXttatcgtaagagcgccatcatcgagg         |
| Kosmotoga olearia     | NC_012785_3344   | gctagatccggaaaagctgaagaccggcgXgtttatggtcttatgctcacagagttgtg    |
| Kosmotoga olearia     | NC_012785_34346  | cgctttgtgattgttctgacggaagcgtXggtagcggcgatgttccggatattatag      |
| Kosmotoga olearia     | NC_012785_39439  | ggaaccaggtttacctgttgaatcacgtcgXgtctagcaattgccagaccttcttctgc    |
| Kosmotoga olearia     | NC_012785_43446  | cgctggcccgagcaagcgtctattatcgaXttacagctttcaagtgttaacattgtgag    |
| Kosmotoga olearia     | NC_012785_53106  | gcatctgcagccagggtgtatctctttgXacgcgtatcttataattccgggaaccacc     |
| Kosmotoga olearia     | NC_012785_59551  | cagtttgcgtcatggtcgaggttatgaatgXtccgaagcgtccagccgagttcgtttatgg  |
| Kosmotoga olearia     | NC_012785_63163  | cttaataaccagcatttaacgcgccgacgatXgggttcggccttctgtcgataaggaagcgc |
| Kosmotoga olearia     | NC_012785_68884  | gaggccaggcatctatgactgtgctctgXacatcttctcgatagaatagtcaagcatc     |
| Kosmotoga olearia     | NC_012785_73015  | gtaagccagagcgatcaagaacaggtcXaacaacagttccaggaaccggatcgc         |
| Kribbella flavida     | NC_013729_122195 | gttcaagattccacgatgagtgtaagcaXtcgttacatggagagcaacgctcgaagtgag   |
| Kribbella flavida     | NC_013729_156333 | ctagtgatttcttagtggtgagcgaXaggtcgacatgatctgcatgactccacc         |
| Kribbella flavida     | NC_013729_186918 | cagaaccttgtttcatcagcgtgagattgXaaggaagcgtgtgatcgatcacaagtc      |
| Kribbella flavida     | NC_013729_203389 | ctttctagtatcactacagaatgaccgXtccaacgccgttctgctatccacgtcc        |
| Kribbella flavida     | NC_013729_22480  | gtctaccgtaatctatagaatctactgacXccgtaccgggtgtaccgaactacacctcg    |
| Kribbella flavida     | NC_013729_237282 | cgctggttaacatacatcagactcgataaXcacgccacagccctcccagtttagttc      |
| Kribbella flavida     | NC_013729_252451 | gatcgagaaagtcctgctgcggaactgaaXtagcgcgaagtcgcttcatccgctctatc    |
| Kribbella flavida     | NC_013729_71306  | gacacgttatactgtccaacaggacacaaaXcgtcgtcgcaggaaattcctgtcctgcac   |
| Kribbella flavida     | NC_013729_87804  | cgctccaactgaaggaaagcccgatgaccXtattgatattccattcagcgcgagtcagc    |
| Lactobacillus brevis  | NC_020819_11816  | gccaattcgctagactgatcaatctgtcXctaaccgaattaacattcaagtggcagg      |
| Lactobacillus brevis  | NC_020819_14575  | gatagtaagcttgacggtgcctgtcgcgaXcaaattaacgaggtcttgggtaatac       |
| Lactobacillus brevis  | NC_020819_27687  | cgctgaggtgattggcagctaattccaaXtaagtgatagaatgcgctcgtcattggc      |
| Lactobacillus brevis  | NC_020819_31640  | ctgtctcactgaccaaaagatgccaaagcaXaatagttccattctcagactggcgatg     |
| Lactobacillus brevis  | NC_020819_43050  | ggagcgeatcaataacggcaccactttcgtXtagtgtgactgaccgcgatacaccttacc   |
| Lactobacillus brevis  | NC_020819_47950  | catctctatttctccttagcacaacggcXgccccttgcccaaggtttattgctgacag     |
| Lactobacillus brevis  | NC_020819_52678  | gtttcacgactgtttcctcctaaagtcXccgcgctaaccgaataaaggttcgtaacc      |
| Lactobacillus brevis  | NC_020819_66501  | gactggactaccctcaggatctctgtactXtactaaccaacggcgcgatgttctctacac   |
| Lactobacillus brevis  | NC_020819_7425   | gccaacctaaaggcgacaactccggaattXacatgagcaatcaccagcacatctattg     |
| Lactobacillus brevis  | NC_020819_75954  | gggattcaacagtaaacaaagattgcgcgXtcttggctagcctggccttgcgtaattc     |
| Lactobacillus brevis  | NC_020819_79756  | ggatgagcgtactctcaaggtcgagagtXcttatcgggtggaagccaaccgaattg       |
| Lactobacillus casei   | NC_021721_17716  | ctgcttgaccaacggcgtcttctcaatggXgttgaattgactgacgcgcatcattag      |
| Lactobacillus casei   | NC_021721_20743  | gaaatcatgaacaataaagatccgacaaXgggaaggttgatcaagcggcgacactg       |
| Lactobacillus casei   | NC_021721_27556  | gttagctgatcgagttgagccagggaactXtgttgagctggtcggccacgagatgaagtc   |
| Lactobacillus casei   | NC_021721_581    | cggcgaagggactagtgacgcgaactcaXagccaaagccatacatgatacaaggtg       |
| Lactobacillus casei   | NC_021721_72121  | gtcgccttgaagcaacggatgacttgcggXcagaagtagcaacagcttctgactagccg    |

|                           |                 |                                                               |
|---------------------------|-----------------|---------------------------------------------------------------|
| Lactobacillus casei       | NC_021721_87321 | gccgaactgacgatcctaacgctaggtXacgtggaccatccaagttatcgcaacc       |
| Lactobacillus casei       | NC_021721_90774 | cacgataggtcacaccgtacgaaataccgtXggacagctcccgaattcatctcctttgg   |
| Lactobacillus casei       | NC_021721_93694 | cgcttattgttaaagtccttgcggtaatXggacacaaatggcgaccgatcaccatcgcc   |
| Lactobacillus casei       | NC_021721_96345 | ggaacgcttctatgcaagtacacgtagcttXtcagcaccacctcattgcaacaacattg   |
| Lactobacillus delbrueckii | NC_014727_21101 | ctgatccggcctcaaatgccaaggctggatcXatccccttactatgagatgatccctgg   |
| Lactobacillus delbrueckii | NC_014727_34831 | cactgagaaaagggtgtcccggccatggXcaattaccactaagaccagaccgctaatag   |
| Lactobacillus delbrueckii | NC_014727_36784 | ctgaccgtggactaacgttcttctgactggXgcaagtacttagtcaatgctccccgctag  |
| Lactobacillus delbrueckii | NC_014727_39954 | cgaggctgaacggataaatcgcgcaatacXcggcttcaattcagccagctcgtgaatgc   |
| Lactobacillus delbrueckii | NC_014727_62    | cattgctgaccgccactgttcagcgaXtattgacttaccgggtgaatcaactggctc     |
| Lactobacillus fermentum   | NC_017465_18752 | gatggcgactggcaaggttacgcaaggtgaXcaatgacgtatcacagatgatgtccaccg  |
| Lactobacillus fermentum   | NC_017465_25555 | cactggcccccgatgctggaatcaacgtaXaagtgagttaaagcgaatggcgtgacag    |
| Lactobacillus fermentum   | NC_017465_3978  | ctgggattggcgttgcaattcctcatcXaacctcctaaccttatgcttccagggag      |
| Lactobacillus fermentum   | NC_017465_47089 | caggtccgggtcgttctccgggtaaaXctacttagcttccactgcttacgctaac       |
| Lactobacillus fermentum   | NC_017465_54444 | cagttgccaacgaatcagttggcccaaXccattctgaattgctggacgttccggc       |
| Lactobacillus fermentum   | NC_017465_62090 | ggccttggttaaggtaattccttaccctXcttaagcaggtactggtaccggccgtctg    |
| Lactobacillus fermentum   | NC_017465_66035 | ctactgtgataacgcaacaatgacgtccaXccttgcaatacatgtgtcactttgtctag   |
| Lactobacillus fermentum   | NC_017465_8017  | ggggccgtaacgatcttaactccaaggcaXcacctctccaataccagaacaacgccac    |
| Lactobacillus helveticus  | NC_021744_14088 | catagactgaattggctgattcacagatXaattgcccgaatggtgatggctctttagc    |
| Lactobacillus helveticus  | NC_021744_21209 | cagttatcataaattgaggatcggggtXgtgtgcaacggatgcccaacaggagagc      |
| Lactobacillus helveticus  | NC_021744_24225 | gcacggctgaaagaagcggctcgaateXtatgtccgattggttctgattgaaccg       |
| Lactobacillus helveticus  | NC_021744_24236 | gcagatcttctgaagcggagctcactcXttcattgtcttctgaacagatgaccctg      |
| Lactobacillus helveticus  | NC_021744_29967 | caatagggcgttctcggcacttggattXaaatcctagggtctgagcctgaatggc       |
| Lactobacillus helveticus  | NC_021744_36072 | gcgtgatgctcattgatatactcagaXtgcggacgatgcagaagcagattggttgc      |
| Lactobacillus helveticus  | NC_021744_59840 | caatagtaaacagatgggttgggtgccXcaactctgtaccagcttggctctactg       |
| Lactobacillus helveticus  | NC_021744_60077 | ccactactggtcaaacctgttattggcaXggtgatgcaacttggcgggtaactaagc     |
| Lactobacillus helveticus  | NC_021744_6244  | ctagaagattgactagattggctcctgatXgaaactctgggtcctgattgctgcgctg    |
| Lactobacillus helveticus  | NC_021744_9660  | gatcaacgtaatgtaccacaagccctgttXaggcatgtaggttatgtgaaagcggccc    |
| Lactobacillus plantarum   | NC_021514_10903 | cgtgtgtaaacgtagtgttcagaataaXatccgatgacggctaccagttgctaaag      |
| Lactobacillus plantarum   | NC_021514_28778 | cggtgatgactggaacggatggttctgattXatagtcgacggatcatatagagcggttg   |
| Lactobacillus plantarum   | NC_021514_33    | caggcactactcagactgaataattcaccgXcagagaactgaaggtccttagcacgagtg  |
| Lactobacillus plantarum   | NC_021514_43401 | cccttctattgatgcaacgttaacagcgXttcatctgaatcccgaatgtcacggtcttg   |
| Lactobacillus plantarum   | NC_021514_48568 | ggcgataatcagagttgccaacaagcaactXtagtgttgaccaatcaggcgaccaacgg   |
| Lactobacillus plantarum   | NC_021514_5190  | cacttagccactgtattgactgaactaacgXgaaattgacgtgacggcacttctcggtaac |
| Lactobacillus plantarum   | NC_021514_70552 | cggaccacactgcccgaatgcctgtctaaXtgaggcaaatcgtagctcgtgatatttag   |
| Lactobacillus plantarum   | NC_021514_79018 | ggacgttgcacgctcaatcgtctcaaggXtacctatagtattgcccacggctctacac    |
| Lactobacillus plantarum   | NC_021514_83766 | cgcacaagaattaaagtgtagtactcaaXtgacagatcaccattcggacagagagcgc    |
| Lactobacillus plantarum   | NC_021514_93662 | ggtcccgtttgaaatcgtactcctgaaXcccaacaccaagtaccccacatgactgac     |
| Lactobacillus sakei       | NC_007576_14633 | catcggccggtgatcggaaagcccggactXggtgatatcagttaacactcagatgtaac   |
| Lactobacillus sakei       | NC_007576_23100 | cgctaacaactagccttagatgttcattXttggcgcccaaggtgacagcgttattcgc    |
| Lactobacillus sakei       | NC_007576_39334 | gtctaagaaccgtgaaatcggcctggttgXcttagcggattgatcacgatactgaccatc  |



|                                |                  |                                                               |
|--------------------------------|------------------|---------------------------------------------------------------|
| Lactobacillus sakei            | NC_007576_43051  | ctaattccgtgcgactaattcatatggccXgaatcgcaagcggcgtaaataggctc      |
| Lactobacillus sakei            | NC_007576_46276  | gctctcctggcccgcataaacgtcacgtXtctcattaaggcgggtgcactaaatggc     |
| Lactobacillus sakei            | NC_007576_49235  | gtgaataccaatttaccgcttagtggcaXgccacctacggaaactaccgcaaataccg    |
| Lactobacillus sakei            | NC_007576_5106   | ccattccgttaaagacatgcctgccttatcXgtctgtccgtcaaacttagtgccgcctg   |
| Lactobacillus sakei            | NC_007576_56036  | cgattacggctgctagggtcaaccgaatcaXtatactcccgatcggagccaataatcccag |
| Lactobacillus sakei            | NC_007576_59987  | gggattaacattgtcccaatagcatcgtcXgtggaactccggcataaataagaccatgc   |
| Lactobacillus sakei            | NC_007576_8928   | gtaagtacgggaatagctgactgaataaXacatcgtgcggttgaccgcgtgaacatcg    |
| Lactobacillus sanfranciscensis | NC_015978_1943   | ccaaacgcacgattggtatcgaaccgacaXcgattctagtgtattccacggttctagtc   |
| Lactobacillus sanfranciscensis | NC_015978_20287  | ggatagcgggatccattgtgggatccgcXgctttacgaatgaagacctatttcgatag    |
| Lactobacillus sanfranciscensis | NC_015978_27718  | ctccgaccacaagtcttggattggatXcggtttaactccataacgcgctacatcag      |
| Lactobacillus sanfranciscensis | NC_015978_29366  | ggaaacgttctgttctgcatgtgtctgXcgtgaaactgcccataaagcgtaacccgag    |
| Lactobacillus sanfranciscensis | NC_015978_38792  | gctgtgttagttaggtgtgcatcagtcXcttgcgtgtgattgcactatgcacactg      |
| Lactobacillus sanfranciscensis | NC_015978_7092   | gaaggtattactcgtgaacaattaccgacXgccaactcgttgcctaaactgccgttgac   |
| Lactobacillus sanfranciscensis | NC_015978_8937   | gttgacctaattaactgtactcccggatXttccaagccgttggatggtcagcgttacc    |
| Lactococcus lactis             | NC_017492_10236  | gactagcgggataggttgagattggactXtaaagaagccgcgccatctgaactctttgc   |
| Lactococcus lactis             | NC_017492_37626  | ggtatcggtagcctgatacggcaaatggcXctcaagaagcactaacacacggcaaatgc   |
| Lactococcus lactis             | NC_017492_41152  | cttctgccgtataccaattccttgacatXgaacaattcctgtcctttgccccatgcg     |
| Lactococcus lactis             | NC_017492_41657  | ccaaacgaattccagccaaactccgagattXcaattgctccggctgagccaaagccgattc |
| Lactococcus lactis             | NC_017492_49407  | caattcggcgtcagaactactgtcgcctcXatctttacggtctgtcaaacctactctgac  |
| Lactococcus lactis             | NC_017492_52931  | ctgttccctgtgggaaacgaaattgaggXttagaagaatttctgcatagcctctggg     |
| Lactococcus lactis             | NC_017492_56356  | ctccgctaccgtctgtgacattcacgataaXctgtttagatgtcaatgcccgacttctg   |
| Lactococcus lactis             | NC_017492_58479  | caccaattgccatcaagcccaattcatXcctgacctcagaattgtccgccactag       |
| Lactococcus lactis             | NC_017492_6623   | cgagttgctgttactcattgccttacaXttgcaacccctgcgtgattaatacgaaggg    |
| Lactococcus lactis             | NC_017492_81342  | gaagtacacgaggttcttccgacgaagtaXgatacagagcaaaagttccgaagcgtacc   |
| Laribacter hongkongensis       | NC_012559_105407 | ctgttgcagaactttgattgagagtaggcXaacacagcatgatctgtcccgaaccagcc   |
| Laribacter hongkongensis       | NC_012559_11874  | gcacatggccggcaatgtctgttcatcgcXccagtgagaggttaaagcagatcaagattg  |
| Laribacter hongkongensis       | NC_012559_23375  | ccacctctcagcagcagtagcaatccgctXtgccaatccagaagcggatgcttaatatgg  |
| Laribacter hongkongensis       | NC_012559_41342  | cctaccagaacgaatcgacgatgcctgtXtgaagccgaggttcaagacaagatcgttc    |
| Laribacter hongkongensis       | NC_012559_56532  | ctggatggattgagcctggcattatcacXatgaatgaagcggcgtaagtacttgcgg     |
| Laribacter hongkongensis       | NC_012559_71060  | catgggtttgcctttaggatgaccttccgXaaccaaggttataaacaatgctcagggag   |
| Leadbetterella byssophila      | NC_014655_10026  | cgttattggacacttattagaatgtggaggXgacggatcgtgacagtttgacaaggtac   |
| Leadbetterella byssophila      | NC_014655_116224 | gatacgtcgcagacactactgcactcatctXgtccgcattaaatcttctctcagagagag  |
| Leadbetterella byssophila      | NC_014655_17967  | cttagctctccggcggtcaactcaaatXgccaagatgacctgcaaggtttgacctctc    |
| Leadbetterella byssophila      | NC_014655_24960  | cttctgatatggacaccgtctttagatcXtccgctccgctgactgttgatgatgatc     |
| Leadbetterella byssophila      | NC_014655_66681  | cactttaactgtgtaaccgctgtgtXtctgcccctcaaacgacgaacttctac         |
| Leadbetterella byssophila      | NC_014655_72028  | ccggacatgggatctgtcacttccgtattXaatagccatttggcaacttccatcccag    |
| Leadbetterella byssophila      | NC_014655_88969  | ggaggatgaagtgttgcgcaagacattXaggagcagaatggcggcagattacacgtg     |
| Legionella longbeachae         | FN_650140_116272 | caagttagagtaagcgcgccgttgaagaXgatctcacgatattcctcgttgacactc     |
| Legionella longbeachae         | FN_650140_119842 | cctctaggagccgaggtgttctcagaactXgcctataatagccttacaagttcgttaggc  |
| Legionella longbeachae         | FN_650140_124089 | ccataacgtttatgcactctgcgtcgcXgaaaccaatcgctgctgatgcagaagtg      |

|                        |                  |                                                               |
|------------------------|------------------|---------------------------------------------------------------|
| Legionella longbeachae | FN_650140_12637  | gctctagtgccttgatacatgctctgctXgatggtacggcgacactgcagaacattg     |
| Legionella longbeachae | FN_650140_129804 | gctcattagatccatatctgtctcaatgggXtccattggcacaggtgccaattgggatgcc |
| Legionella longbeachae | FN_650140_20915  | ccagggcgcaagattactgtgtgaggcacgXatattatctccagacctgtttgagctg    |
| Legionella longbeachae | FN_650140_27672  | ggatgctgtactgttccaaggtgcttcggtXtatagagatgatgcaactcactcatcaagc |
| Legionella longbeachae | FN_650140_34854  | caaacggatggctcctgttgcaattgaacXactgcaaatagattaagacgtcatccggg   |
| Legionella longbeachae | FN_650140_372    | ggacaaggcccgttatcgtattgatggtXaagtatgctggctcttattctcactgctagc  |
| Legionella longbeachae | FN_650140_40036  | ctacaggtgggtgctccattcttgaacaXttcatgaactgacattcccagggaatggc    |
| Legionella longbeachae | FN_650140_53602  | gaacaagagtgttgctgtacaagtcatXggttacgagcctcatgctcataactgcc      |
| Legionella longbeachae | FN_650140_90162  | cgcattgtcaaaacagttggcgtgacgtXgccgcaataagtaagaaggcgtttcttcg    |
| Leifsonia xyli         | NC_022438_35287  | cgactttgcttgcctctgtgttgccgaXcattgggaatctcagtggtgatgctaccg     |
| Leifsonia xyli         | NC_022438_365    | ccgacgggcatttcgggtattctctgtctXtccaacaactgatcggcgctttctgtg     |
| Leifsonia xyli         | NC_022438_42908  | gtcgtgttcttccagatgtggatgctXtctccggttcacgacgaaggatgctcc        |
| Leifsonia xyli         | NC_022438_44194  | ccaggtgcttacaactcccagaaagtccaXctgacccctcgaatagctcftaaacggg    |
| Leifsonia xyli         | NC_022438_52231  | gaggttgaccgaaaccacgtactgaggatcXtgccgatgaagtaattgtagtcgggtatcc |
| Leifsonia xyli         | NC_022438_53082  | ggcatctctccggaagacgtttgtagtaXgcaagttgtccgatgctgtttgattgaac    |
| Leifsonia xyli         | NC_022438_61575  | gcccagtttcccggaacagataatccgaXcgtactgtctccctggttgcataatctgc    |
| Leifsonia xyli         | NC_022438_61600  | gcaagtaccgcatttccggcccgggtgctgXtcaacaatcaccaacagattgggtttacc  |
| Leifsonia xyli         | NC_022438_67355  | gaaccaacgaactgtcgaacgagctgtggcXtgagaacacagcagaggagcactcaatgg  |
| Leifsonia xyli         | NC_022438_79747  | gaggtttcattctctctcattgtcagagcXctcgtatgaactacgccgataacccttctc  |
| Leifsonia xyli         | NC_022438_89292  | gacactagaaatggactgattgttactgaXgaaagcgcgaccacatgatcggctgaac    |
| Leptospira biflexa     | NC_010842_106682 | ccactcaccgttcgtattgtatgccgagacXgaaatcatccgtctctgtattgtgtgac   |
| Leptospira biflexa     | NC_010842_119980 | gaagattactgtgtggaactcaccgattXgtgggtgggtgggactgatgtactcgaagg   |
| Leptospira biflexa     | NC_010842_13456  | gattgatggatacagcactcccgtttggccXctcgggaaagctcagcttatcttcttc    |
| Leptospira biflexa     | NC_010842_26701  | cttgtgcacgggtattcttggattgacgacXgctgtcctttggatggccaatgatcggc   |
| Leptospira biflexa     | NC_010842_45972  | gaagaggctgtgacgtttaccgtctgtcXaggccacacctccgatccaactcttc       |
| Leptospira biflexa     | NC_010842_54975  | cactttcattctcgtcgcgccaaccagXcatactcggagttgtctggatccaaatc      |
| Leptospira biflexa     | NC_010842_62607  | cttcggccacctgtgtttggattctccgXcttcttcgctccaatgccaatcgattcc     |
| Leptospira biflexa     | NC_010842_68804  | gctttccaaggaagccttgatgttgcgacXgacagatccgactgattgaagaagcggcg   |
| Leptospira biflexa     | NC_010842_74842  | ggaacctcgcggatgaggatgtgcccaccaXtctgtttcttccctgatcgataaagac    |
| Leptospira biflexa     | NC_010842_83694  | cctcgacttggatcagggatccgaaatcaXccgggcatagagaatggacgctcagatc    |
| Leptospira biflexa     | NC_010842_96983  | ggatttggatcctgcttctcaaatattcXgtatgacagtttagtccgaccgataaccctc  |
| Leptothrix cholodnii   | NC_010524_108503 | gagttgggtcggactgcaacgggtcgtgXcatagaatgccctcetaagaattacggctc   |
| Leptothrix cholodnii   | NC_010524_128489 | gctactgccagtgccatcgggtccgcttatXtcatggcaaatcttcttgaagggtttgcg  |
| Leptothrix cholodnii   | NC_010524_162879 | gatctgggtccgattgttgttcccatXgtcgtggatgttcatggtaattctgtgc       |
| Leptothrix cholodnii   | NC_010524_2391   | gccgtggcacttacgatttctaattgggaXccacgcagttccgatccgctcaatgac     |
| Leptothrix cholodnii   | NC_010524_31494  | gagaaccggacctgtgcttctaataatctcXatgcctgtggccttccgactcctggatg   |
| Leptothrix cholodnii   | NC_010524_66542  | gcaggtggatcttcggagtacttaccctcXaaactgccatacatcaactcaggttgc     |
| Leptothrix cholodnii   | NC_010524_79127  | gtgaaatggagtctcctatgaaacgattgtXtctggatgaagtagctgtaggcacggcg   |
| Leptothrix cholodnii   | NC_010524_86351  | ggtgattcgcgaacgggttgcgaactcgtcXtctgtttaaagggtgaatcgtggatttg   |
| Leptotrichia buccalis  | NC_013192_15334  | ctgcccttcagcaagcctagattgacagXcttccatagcagatgaagttgtattgtac    |

|                           |                 |                                                              |
|---------------------------|-----------------|--------------------------------------------------------------|
| Leptotrichia buccalis     | NC_013192_16480 | gtgatgtgggacgtgtgtaaatgtttcgcXttggaacgctaaggcttagcttgcgattc  |
| Leptotrichia buccalis     | NC_013192_41368 | gtagcccccagcgcagaatggatcttgacaaXcaaagtacgtttgtgttgagggaacgg  |
| Leptotrichia buccalis     | NC_013192_49654 | cttccgtccttgagcctatgtagtctcctXgaaatcttgagcattcgtgggacactagg  |
| Leptotrichia buccalis     | NC_013192_67370 | caatgttgctcaaggtccgctgtttagcXttcacctacgtttgcagttgatcagcttc   |
| Leptotrichia buccalis     | NC_013192_7450  | ctgctgatgcgtatgttgagcctatgcgaXtgaatctgatgatggaagttcagcgagc   |
| Leptotrichia buccalis     | NC_013192_80248 | cgccatcttctcggaatggcaatcggtggXatttatgtaactggcgctgtgatatttc   |
| Leptotrichia buccalis     | NC_013192_903   | cttacagaatgcggacatctccaacacctXatttcgccagagatcctgctcaagttatg  |
| Leuconostoc citreum       | NC_010471_10208 | cggtcagtagcaatataagcgggtgaactXttagccatgtaggtacgccgctgtgtaag  |
| Leuconostoc citreum       | NC_010471_13062 | gatttaactatcgtgctgatgcacctgaaXcgtatagcgctgtattagcaacgggtccg  |
| Leuconostoc citreum       | NC_010471_16089 | gcagccgttaacacgcgtgataacatgggcXgattccttaattgcttcgataagaactg  |
| Leuconostoc citreum       | NC_010471_24784 | gcaatttgatggcaaccatacagcaggaXagtggcacagctgctgctactataaagc    |
| Leuconostoc citreum       | NC_010471_27706 | cgftggcaatagttggcagactgcaatgaXccgatacaggaacgcagatgcttcaatg   |
| Leuconostoc citreum       | NC_010471_33353 | cggtgcctccttaattgtataaagtacXcttgataccctaccactgtcgccttgc      |
| Leuconostoc citreum       | NC_010471_3450  | cggtgccgtacgagaagctattgcaactgaXattaataagtcagcgacaggtgtctcagc |
| Leuconostoc citreum       | NC_010471_4606  | ggtatcttcattgccactatgtagcaataXttgccggcatatgcttgcatacggcacag  |
| Leuconostoc citreum       | NC_010471_53767 | gtgtactgacaactatcttgattatgcXggcttgacgtaccgccctgttctacagc     |
| Leuconostoc citreum       | NC_010471_58053 | gtccgcactaacaacgattgttattgctgXgcagcaacgatactaccgcatagttactc  |
| Leuconostoc citreum       | NC_010471_59638 | cataattgatgcccccggcttatctacaaXaaacagctgccatttatctgccagtgc    |
| Leuconostoc citreum       | NC_010471_7339  | ccgtatcaatgcttgcgtgctggctgtgaXgacgacagttgatcagaagaccattaag   |
| Leuconostoc mesenteroides | NC_008531_12777 | catccgcttcggaaatgagcatttgcaacXcgggtgacggttagctataagaccacgagc |
| Leuconostoc mesenteroides | NC_008531_16000 | cgfttttgcatcaaatgacaccgcacaXagatactgaagagacggccgtctactgtgg   |
| Leuconostoc mesenteroides | NC_008531_23730 | cagtagcacaatgtagagtgcttgtgaXatgcagcgcttacttagcttgcgagggcc    |
| Leuconostoc mesenteroides | NC_008531_26122 | cgtttctcgggctgctggtggtaactgXgctccagttacttactcgtgaaacagag     |
| Leuconostoc mesenteroides | NC_008531_40056 | cccaccgagtaagcaagctcagccaaatgXtctaagggtgaaactaattgccctctatg  |
| Leuconostoc mesenteroides | NC_008531_41316 | caggtagtagtgactacggcctttctcXatcaattaggtgtgccattcacctctgtg    |
| Leuconostoc mesenteroides | NC_008531_4141  | caggctgacagtcggcactaatgtacttcaXgatgttgatggcactcacatgggtctgag |
| Leuconostoc mesenteroides | NC_008531_42228 | ctcgatatcatgaattgacaaatggcttagXctcacaagccttcggcggtaacgtctcac |
| Leuconostoc mesenteroides | NC_008531_46040 | gcgcaagcccaccaatagtaacggcaagXctggtttacgatctccaatgatccaatc    |
| Leuconostoc mesenteroides | NC_008531_51198 | cggtaacatagttctcggcttgagaaacXgcatcccactctagatacccggttgaaac   |
| Leuconostoc mesenteroides | NC_008531_51724 | gaattagccaagacctctcgtttcaccaaXctgttttaggtaattcaaccacttccccgg |
| Leuconostoc mesenteroides | NC_008531_59155 | cttgcgtgtttcaacaatgaatcagcgtXtgcgtctatctgggctctccccgccattg   |
| Leuconostoc mesenteroides | NC_008531_60894 | ggaactcctcagggcgcataataacgcXtgcgtgtgcacgttcaatcatccatgcc     |
| Leuconostoc mesenteroides | NC_008531_9815  | cggttggatcgtgattaactttgccactgXctacagggctgttagtgatggttgttcag  |
| Listeria ivanovii         | NC_016011_21014 | gagccgtcgtaacagcggttatgcttaggaXgaaatcggttatgtagatcagttgcctcg |
| Listeria ivanovii         | NC_016011_2389  | ctggcattcgtggtgtggcgatgatattXgaaacctccagatacctccgagagaacgc   |
| Listeria ivanovii         | NC_016011_24575 | gttagcctcactcgtaccatgtttagtgcXcgggtgacgtctcttatgtgattgttagc  |
| Listeria ivanovii         | NC_016011_3904  | catcagtgagggcacgcacacgataatctaXaaagctcgcgattaatcagtaggcacttc |
| Listeria ivanovii         | NC_016011_4063  | ctegaattccaccggtgttcgtcatcgcXgactattgcaagtcaggtgaaaggtcag    |
| Listeria ivanovii         | NC_016011_47619 | gcttcaccaattatcggcttccgtgcXcatgtgcatcattagccgttgcagttaaag    |
| Listeria ivanovii         | NC_016011_54726 | ctacgctcgtctcttacaacatctccgXgttctggaataacatccactggttcatccg   |

|                                  |                  |                                                             |
|----------------------------------|------------------|-------------------------------------------------------------|
| <i>Listeria ivanovii</i>         | NC_016011_74894  | cgftaacagaagtgggtgtggtggcgtgttgXaagatgtcccgaactactagggtagt  |
| <i>Listeria ivanovii</i>         | NC_016011_95830  | ctgatacgtcgcggttatctgtattgacagXgcgctgccattcagagggttagcgtc   |
| <i>Listeria monocytogenes</i>    | NC_013766_100350 | caacgtccctctactgttgaaggataXagcgcttccgatggattgaataaagctcc    |
| <i>Listeria monocytogenes</i>    | NC_013766_103    | ggatggcaaatgagcttgggtggcttettaXttgagcagtgctattgtaactcagctc  |
| <i>Listeria monocytogenes</i>    | NC_013766_23317  | ggacgttcaaacctgaagcggacaatcgtXtgaaccgatgttcatcagggtggaatg   |
| <i>Listeria monocytogenes</i>    | NC_013766_37530  | cttatcgtattactaccattcgtgagcgtXacacttctgctggtgcttaaccttgcg   |
| <i>Listeria monocytogenes</i>    | NC_013766_62826  | cacgagcgtaaagccgggaataagtgaXatcttctgactcggatgttccgcagg      |
| <i>Listeria monocytogenes</i>    | NC_013766_70065  | ctgtatcctcctcagtggttccgctaattXaccgactgtttatagcccgaatcccgtc  |
| <i>Listeria monocytogenes</i>    | NC_013766_73692  | gcttaccctgcgattgattggagtacacctXatgaccgctcctccaagcattaatcgc  |
| <i>Listeria monocytogenes</i>    | NC_013766_7492   | caaacataatgccagccgagagagcgttcXttgcgcatctttagattacttatgg     |
| <i>Listeria monocytogenes</i>    | NC_013766_76575  | caattgcagcaaatgtccttgaaccggcXatcatctcagcgttccaatacgtggtg    |
| <i>Listeria welshimeri</i>       | NC_008555_12188  | ctccagtttagtaaaegcaccattatgcgaXgcaacttcaactctcattcactcggcg  |
| <i>Listeria welshimeri</i>       | NC_008555_12283  | gcatcacgggattatgggtgctggacaacXaatgaatgattcacgtattgatttgggc  |
| <i>Listeria welshimeri</i>       | NC_008555_146    | catggattactgcgacgatgtaggagttXatgttgactgtggtggcgacacctgtt    |
| <i>Listeria welshimeri</i>       | NC_008555_19972  | gtgttcaacgtatggacgaagctatcgtagXatgatgttcaatgatgaactacacggcc |
| <i>Listeria welshimeri</i>       | NC_008555_26612  | gtggctcttctctatgctgggtataatgaXtgaactgacaggtgaagtactcfttagc  |
| <i>Listeria welshimeri</i>       | NC_008555_28301  | cgacctctcgttattggcggtagatggcXgtacaagtgtgctttatgatagtgagacg  |
| <i>Listeria welshimeri</i>       | NC_008555_38643  | ggaaccgtagcagacacactgattggcgaXaccgactcggaaatcggttattgatacgc |
| <i>Listeria welshimeri</i>       | NC_008555_66647  | gtccgtgttcgaggaagcccacaagttXataatcgcgatggtattaaccaagcaac    |
| <i>Listeria welshimeri</i>       | NC_008555_80574  | gccaccagtcaaaagttcgcaagcactcXccaatcagttgattcgcaaggtcactccc  |
| <i>Listeria welshimeri</i>       | NC_008555_84248  | cgtcaccgtctaaagctcttgcaccaaccgXaaagaatcggcgagaatttcagataagc |
| <i>Listeria welshimeri</i>       | NC_008555_8581   | cgcttataggcgtgcccgttagcgtgtgXctcttgattacgataaagggaatagtgc   |
| <i>Listeria welshimeri</i>       | NC_008555_88568  | gccaagtcgtcagcaggtccatcgtttcXatcatgtccagcagcgtgacaattccgc   |
| <i>Listeria welshimeri</i>       | NC_008555_89368  | gatttctcatcactattcggcgtccatXcagcagctctccaaagccctaaagtaaccg  |
| <i>Listeria welshimeri</i>       | NC_008555_93495  | gattcttggcgtaaaacttctaccacctXtctgttctgttctgtaccctgtcttc     |
| <i>Lysinibacillus sphaericus</i> | NC_010382_101039 | gaccattgcagcaggtctgccttggagaXagccatcacacactgtgtagcactagc    |
| <i>Lysinibacillus sphaericus</i> | NC_010382_111217 | ctgagattcttggcttgggtgttctgactXttcaacctccacagctgtgcccacttcc  |
| <i>Lysinibacillus sphaericus</i> | NC_010382_120000 | ctccctgttaggggtgagaatttccgtctXatcagccgattgcaaatgtccaaagtc   |
| <i>Lysinibacillus sphaericus</i> | NC_010382_126537 | gcccatacggccactgtttcgcacgtcXtaagtcttccaacaagaacgccactagc    |
| <i>Lysinibacillus sphaericus</i> | NC_010382_154282 | ctattactggtgccaccgttattcattgXtatgctatggctgagaagcttcaagagcg  |
| <i>Lysinibacillus sphaericus</i> | NC_010382_35643  | gcatatgctgagcttctgcaaaagcacaXcgtgtaaacgaagtgaagcttattcgcaac |
| <i>Lysinibacillus sphaericus</i> | NC_010382_54166  | caaaagcgtatggaggagcgttacggcttgXatggcttacgcttctatccgttattc   |
| <i>Lysinibacillus sphaericus</i> | NC_010382_63998  | cggcgatagctatttctctgtagatagcXcagctcctcaatcaagatgaagcggcg    |
| <i>Lysinibacillus sphaericus</i> | NC_010382_74991  | ctctgtcattaggtgattgtagctctcacXgtgcatagcaatcagcgttcttgaagg   |
| <i>Lysinibacillus sphaericus</i> | NC_010382_85055  | caatgggtctctagcatgtggatggatcaXtccatgggaacatgaacggtaactgctc  |
| <i>Lysinibacillus sphaericus</i> | NC_010382_864    | ccatcaatcagcagggttggcaagtatgaXcttctggtgcacatcaatggttcaagctg |
| <i>Lysinibacillus sphaericus</i> | NC_010382_93016  | gtgataatgaggagctcttgcgagtggtXgctgtttctgcaaacggtacaaccgttc   |
| <i>Macrocooccus caseolyticus</i> | NC_011999_21677  | ggttgattggcatgagccgaattgctcgtgXttactatccttccaatgttggacag    |
| <i>Macrocooccus caseolyticus</i> | NC_011999_25883  | ggaagttctgtgtgatgcatgcgtacaXtgcgcgcttcatcattagatttactc      |
| <i>Macrocooccus caseolyticus</i> | NC_011999_56949  | ctctgtaatgatagcttccggtaacgtcgXaccactcgaatcgcgatgagctgtgc    |

|                                  |                  |                                                               |
|----------------------------------|------------------|---------------------------------------------------------------|
| Magnetospirillum gryphiswaldense | NC_023065_115054 | cgatcgacgtaatggtgatccgggtttcXtccaggcggcggatcatgccgagatattg    |
| Magnetospirillum gryphiswaldense | NC_023065_138912 | gagcgggattctttgctgaaactgcaagXctggccaagggaattggcctatatcgagtgc  |
| Magnetospirillum gryphiswaldense | NC_023065_67031  | ccgaggtttgctgatcgacgtgctgttgtXaacttcaaaccaatggccatggaccgatg   |
| Magnetospirillum gryphiswaldense | NC_023065_67557  | ctctcgtattccacagctcaataccgttXatatttgcgaccatgctggcgctgtgatc    |
| Magnetospirillum gryphiswaldense | NC_023065_67926  | gaaccacgaggttctgctgccatttgcXgatcagccacggcaataaggtagcattgc     |
| Magnetospirillum gryphiswaldense | NC_023065_68412  | cgttaccattgctcctccagatcgcccgaXatcattcaacctgcatttgaagtctcc     |
| Magnetospirillum gryphiswaldense | NC_023065_84608  | cgatccagacctcagccacaaccacatcgXccagcaatgtcttccagattcgggacaac   |
| Magnetospirillum gryphiswaldense | NC_023065_85709  | gaaatcgttgagtgctcaccaccagcttXcaccaggaattcggattgctgatcgaggc    |
| Magnetospirillum gryphiswaldense | NC_023065_85719  | gattctgacagtgccagcttggcggatXcaccagaacgacggcgtagatatagttctg    |
| Magnetospirillum gryphiswaldense | NC_023065_87958  | cccgtgacagcaattgatcattcatctgXtttcccaataatccgcacatcggtttcg     |
| Mahella australiensis            | NC_015520_21607  | ggcaaagtggcagccattatcagatgattXgtgtaactggcgggtatcgcatttccag    |
| Mahella australiensis            | NC_015520_27920  | ctgtctcggccatattgatcgtgtgccgaXaaatgctcgcataatgctggcgttaaacg   |
| Mahella australiensis            | NC_015520_32772  | caacagtacaagagcaattgctagatgagXaaagggctcatagctgtgggatgcctttcc  |
| Mahella australiensis            | NC_015520_38572  | cacagaacgaccggcgtgacatggctaatXgagtgaaagcacaacttctacgttccaatgg |
| Mahella australiensis            | NC_015520_53320  | ctcgtatgatgttctatgaagcggcctccXtataggatcgagcggccatcgataaacg    |
| Mahella australiensis            | NC_015520_78473  | cttgcaccgatgggcttaccatgaccctgXgtacattcaagctcatagtagtatagcc    |
| Mahella australiensis            | NC_015520_83     | cgctgctgaacgcgctatgtagtagtaXgattacggtaacagagccgactgtgtgag     |
| Mahella australiensis            | NC_015520_89112  | cccgtcgcacgtgtttgctgaaatgacXcgtatctacgatccctaccattatcagg      |
| Mahella australiensis            | NC_015520_97861  | cctgcagcagtaataaggacacttctcccXagcacttggcgttcaaaagtacgggtg     |
| Maricaulis maris                 | NC_008347_101690 | caatattgctcgtatggctcattctaagcXtccgcatccaatcccgtctatgccatcg    |
| Maricaulis maris                 | NC_008347_111528 | ctcgcacacaccgagttcctccgaagcttXttgccgttgatagcgtgattgttgc       |
| Maricaulis maris                 | NC_008347_16889  | ggcggcacaagaatgggttaatccggcgacXactgttaagcatgacttgaatcgggctgc  |
| Maricaulis maris                 | NC_008347_23568  | cgagatattccgcgataaattgaattcXccgcaaggccgcatctcgtcacgggttcg     |
| Maricaulis maris                 | NC_008347_32260  | ctctatatcgggaaggttaactacaactcgXattccgatctgcagatcaatcggccag    |
| Maricaulis maris                 | NC_008347_43915  | gtctccatagacgtgtcattatttctaXcgtatgaggtcatctagctggttcggtcgc    |
| Maricaulis maris                 | NC_008347_48400  | catcataatcgaatgagaaggtcgaataacXtgtggcgaatgaagtctcgcgacatcgg   |
| Maricaulis maris                 | NC_008347_6157   | gcagcgtcgcgatacgtctcagcgttXctggagatagacatgactgattattggc       |
| Maricaulis maris                 | NC_008347_62997  | cttcgcgtccagcagattgattgttcaaXccgacaacagggtgacaatacggatcatgg   |
| Maricaulis maris                 | NC_008347_64     | gtgccgatgtgacccttgagatgaatggcaXtctatgacattaccggcaaatggcggatg  |
| Maricaulis maris                 | NC_008347_80366  | ggcggcagatgagataattctcgaaccggXgcgatgtctccggcgtattgttccagtg    |
| Maricaulis maris                 | NC_008347_85010  | gaagcaattgatgattcaattgctgaccXtccgctacgttccgcatgtagggctcac     |
| Maricaulis maris                 | NC_008347_89982  | cgacaaactggatttgcagatgacgaattXccaatctccagatgcgcgctcccggatgcg  |
| Maricaulis maris                 | NC_008347_97399  | gtggtgttgattggtatcagtcattgtccXtgggtccaataccgagattggccttcatcg  |
| Maricaulis maris                 | NC_008347_9754   | cgtttcgcaccgaaattgatgaattcgcXcggatcagatgacatgagcgtttgtgg      |
| Marinobacter adhaerens           | NC_017506_116497 | ccaagactggcaattgtcggccaggtaggtXctgaaataactaccgtccgggttcagtag  |
| Marinobacter adhaerens           | NC_017506_17260  | cgaaggtagtgtaacttggcttgtgtgcXaaggcaggtcgcgcaatgctaggtattgc    |
| Marinobacter adhaerens           | NC_017506_26183  | ccataatgtggacgtgattgaactaaactXaggactgtggatcgggtcttatcgcagg    |
| Marinobacter adhaerens           | NC_017506_35833  | gacaagatggcaggtgcttctgctggatXagtccaaccgttctgaaggactactcc      |
| Marinobacter adhaerens           | NC_017506_5251   | gcgttggcatgctgagactcagagccagaXtatattccagatagcattcccgtttcg     |

|                              |                  |                                                                |
|------------------------------|------------------|----------------------------------------------------------------|
| Marinobacter adhaerens       | NC_017506_63249  | gaggtaaatggtcggccggttctctctgcXctcgatcatattgcctacttcaccgacgtc   |
| Marinomonas mediterranea     | NC_015276_126704 | ctttgtggataagcggtaattatgcacgXtcctctttatcaccccttgcgctcattg      |
| Marinomonas mediterranea     | NC_015276_134746 | gcataaccgtcggctcggcttgagagtacacaXgctgtatcgatctctcgtttatccaac   |
| Marinomonas mediterranea     | NC_015276_13933  | ggtgaatccttttagaatggatgacagggcXcgtcttctcgtatcacgccattggcttg    |
| Marinomonas mediterranea     | NC_015276_23327  | ctgttattatgctcgcgagtcgcttctgXggttagcagcagatgatgctcttaaggg      |
| Marinomonas mediterranea     | NC_015276_241    | ctactaagctctcgcgatgactaatttacctaXcaacgatgctcgttgcgtgcccgcgtg   |
| Marinomonas mediterranea     | NC_015276_38036  | cccttctctgatcttgaggctattggcgttXccgttaaacccttcaattaggcgcgctgg   |
| Marinomonas mediterranea     | NC_015276_48857  | gccagcgaacttaaggagcagagctcgtXaacagcgggttcagcaagatggtttgattc    |
| Marinomonas mediterranea     | NC_015276_58202  | gacgcagagcaattgcagcttaactttgctXctgtcaaaaggaaagtcgtcatgaacctc   |
| Marinomonas mediterranea     | NC_015276_73994  | cagtaacttgggtgattgtggcgtctaagXtactcctcgtcaactgaagtggcggatagc   |
| Marinomonas mediterranea     | NC_015276_90467  | caatgacagacgaagaccttctatcgcttXcacaaccaattcgcctatcctctatcgac    |
| Meiothermus ruber            | NC_013946_103110 | ctcagttgttggatagcacctccgataagXttatccttgagcctcctcgtttcgcgtacg   |
| Meiothermus ruber            | NC_013946_18776  | gtcggtcaggtagtcagccattcctcctXcagtcgttgtgctgctgtgtatccattc      |
| Meiothermus ruber            | NC_013946_28796  | gctttcttagcaataaggccctacagcctcXccctttgccatactcgggtggaataagc    |
| Meiothermus ruber            | NC_013946_46703  | gttgatttgggttgcacaactaacggctaXtgatactcgtgtagttcacacttgcctcc    |
| Meiothermus ruber            | NC_013946_76465  | caggccaggcccgaacctcgcgaatttgcXtcagcgtctatcttgttgcggattatag     |
| Meiothermus ruber            | NC_013946_79738  | ctaattacctcgcctcctctcactcXtatctgctggcgcctcctgctattcgtcggg      |
| Meiothermus ruber            | NC_013946_87026  | gacgcatttgggtggttcaccgggtgcacaXacagcttgacgcctatgtaacctacag     |
| Mesorhizobium ciceri         | NC_014923_117012 | gtctgtcgggtcgttcatggtcgttXgtttcaactcattctgtcgaatgcag           |
| Mesorhizobium ciceri         | NC_014923_123628 | ccgctaccgggaagtaggctcaactcctcagXtgatgtccattcgaacgccttgaag      |
| Mesorhizobium ciceri         | NC_014923_132267 | gttgcaaatattcaaccggctcgaactXgcccttggatagtgagctgtatgctag        |
| Mesorhizobium ciceri         | NC_014923_160433 | gagattatcgttgcacgatcaatcXgatctcctacattgcctgcggttgatc           |
| Mesorhizobium ciceri         | NC_014923_170844 | gcctgtgctggagtgacctcaatgagccgXgatagttcaatcgggtacgatcctactcc    |
| Mesorhizobium ciceri         | NC_014923_208473 | ctgaagcggcattgaaagccggaattcgXgctccatagcgttcacataagcctcgcagtc   |
| Mesorhizobium ciceri         | NC_014923_76624  | gttcttcggctccctgaagaaatgaagctXgtgtcaggaagtgaactcctcagatcg      |
| Methanobrevibacter smithii   | NC_009515_12019  | gaataaccgattgctgagactatcctcccXgttactgtatctgcacttacatctgctccg   |
| Methanobrevibacter smithii   | NC_009515_30551  | ctgttatcaagaggagatgacctcaaggXgactactggtgaacctcccctgtaatctc     |
| Methanobrevibacter smithii   | NC_009515_3542   | ctgccatgtgaaatcatagttccgggataXctgattgcttctcctgcccctccgctttg    |
| Methanobrevibacter smithii   | NC_009515_38900  | gaggacatgtactttgattccattaaacacXggtcatgccaacctgcagatattggccc    |
| Methanobrevibacter smithii   | NC_009515_48142  | caatcctccatgaagtgaagtcgctttXaattgcggttaattgctggagcgtgagcaag    |
| Methanobrevibacter smithii   | NC_009515_53468  | gatgttaatgctcagacagcgaactcttctXattatggagattctgctcagcagcagc     |
| Methanobrevibacter smithii   | NC_009515_53480  | gagttggctggtgattgtactggcaactgXctttcatctctgtagatggaatggttgtg    |
| Methanobrevibacter smithii   | NC_009515_59519  | gtccggtaatgctactttggatccattgXtgccatgggttatttggctagctggttag     |
| Methanocorpusculum labreanum | NC_008942_15910  | gcacagggatactaccgtttgatcgttcXgtgtatgaaagaccgtagagcagctcgacc    |
| Methanocorpusculum labreanum | NC_008942_19529  | cttcacgaatcatgatctgatagagctcggXacatcccgaatcgtacgattccctgatgtc  |
| Methanocorpusculum labreanum | NC_008942_25325  | gtggaactcaaccgtccgctctgtatcttXattgctctgatcattctcatatcgggactg   |
| Methanocorpusculum labreanum | NC_008942_40327  | ctcatctcgtcataggtgcttcggctcggXattcctcctcaatacaccgcatatgatg     |
| Methanosarcina barkeri       | NC_007355_122646 | ccaccagccgctcccaactgaatcaatctXagatagcatacatcaacggcgtagccac     |
| Methanosarcina barkeri       | NC_007355_145743 | catctgggtgaccgcaagcgggtattcgacXtaccgctcctgatgaaagcacgtaaatgctc |

|                                     |                  |                                                                |
|-------------------------------------|------------------|----------------------------------------------------------------|
| Methanosarcina barkeri              | NC_007355_352    | ctcagtaggatcctcgcttctctgccatcXcgaatattcacttctctcccatactcaag    |
| Methanosarcina barkeri              | NC_007355_54566  | ctacttgcctacagctaataaggcaaggtcgXacgtttcaacagctgcccagctgagatgct |
| Methanosarcina barkeri              | NC_007355_69401  | gagaagatgcaaggattaccggagttccaXatctccagttacctgcttctcgaacagg     |
| Methanosarcina barkeri              | NC_007355_95048  | ctttgattgggatctacatgttcaactaXcaagcgtcttgaatccctgcaccagcggc     |
| Methanosarcina barkeri              | NC_007355_9543   | gtctgggcatccagctctcatctgttgXaaatgatggctgttacttactgattctag      |
| Methanosarcina mazei                | NC_003901_105695 | catggaaggaggatgccttaactccaattXcattatgagttccgggctgactgttatg     |
| Methanosarcina mazei                | NC_003901_110774 | ctatcttccggtagctttaacgggaagtXctgttgcgcctcctgataataaggatgcag    |
| Methanosarcina mazei                | NC_003901_123736 | gagccaggatccagctctctccgggcXgaaattaccctaccgttacctaggggtacc      |
| Methanosarcina mazei                | NC_003901_129322 | gtgaaactcagggttgctttatctatctXacgctgtggagcagaactggagatacgcctc   |
| Methanosarcina mazei                | NC_003901_135296 | gttatattgccggtcttatagagaccgtXcagagcaccctcaaggcatctattgcgcc     |
| Methanosarcina mazei                | NC_003901_72072  | ccgttccagccgtgaacctgagaacattXctgctctaccaatcctgccgctcagcttc     |
| Methanosarcina mazei                | NC_003901_91005  | ggcgggtaataagattgtctctattcgataXatacggagaggaatcatcgtctgacac     |
| Methanosarcina mazei                | NC_003901_99331  | gagcagaagggttaactactgggcgaatgaXgtttaccgcatctgacagcgaagacctgc   |
| Methanothermobacter marburgensis    | NC_014408_15207  | catcaagtgccctccctgacggcactctcaaXatttactggcgcctcatggtactccatac  |
| Methanothermobacter marburgensis    | NC_014408_22163  | cttactacagaggagactttaatagggtgXggtagacaggtcacgttaccctcaggagg    |
| Methanothermobacter marburgensis    | NC_014408_26356  | gtagatgtctgctcacggtagtgtgacagXctgggtgtgacaccctaccattaacag      |
| Methanothermobacter marburgensis    | NC_014408_28334  | ggagcagaggatttatattccatcacccaXacagcctgatgccatcatccaccatcaaac   |
| Methanothermobacter marburgensis    | NC_014408_32252  | cataatcagttgccctgagttctcttccXcatttagaatgatctggagacggccatcc     |
| Methanothermobacter marburgensis    | NC_014408_34911  | caaccttatattgagcctccctgtccttXggtattctccacatcagcacctgaagatg     |
| Methanothermobacter marburgensis    | NC_014408_54416  | ctgtctcaggctctcaccaagttctctgcXctgagagaatgggtggatgccttaagac     |
| Methanothermobacter marburgensis    | NC_014408_5722   | gttccggtgatgaaatagaagatgcaatgXctcatgagggcgatataactgtctggggc    |
| Methanothermobacter thermotrophicus | NC_000916_13043  | cacgctactgtctacatcatacagacctXcctctcaaaagctcactgtggtggtaccgc    |
| Methanothermobacter thermotrophicus | NC_000916_24861  | ctcccaaccatctcgcagctatcataagXgagtgtggttctctgctaccggcttcagc     |
| Methanothermobacter thermotrophicus | NC_000916_28189  | ctggagctgcatggtactgtctatgagcgXttatgaccttatctctctgacctgttgc     |
| Methanothermobacter thermotrophicus | NC_000916_36110  | cgggtgttagcttctccgggtgtcttccXgatctgcatcggaattaccacaatctctg     |
| Methanothermobacter thermotrophicus | NC_000916_44041  | cagctctaaactccatctctctgtcggXaagggcaaggtaccttaccaggtgctgatg     |
| Methanothermobacter thermotrophicus | NC_000916_46493  | gagatagatggggtagaggtaattgtgXgacggcagggaggtgaggtgaggatccac      |
| Methanothermobacter thermotrophicus | NC_000916_49387  | gaatgatctgcctcgggtgtataacctXtttcttacctctgagcggccttgcgaag       |
| Methanothermobacter thermotrophicus | NC_000916_55054  | gtggtgattcctctggtgagcttccagagXgcatactccgggaaatcacaggtgacgtg    |
| Methanothermobacter thermotrophicus | NC_000916_61     | cctgatgggtgctttgtaagatacgggtaXggtgacggcagcagggctgacctgtaaac    |
| Methanothermobacter thermotrophicus | NC_000916_9445   | gaggacctcaatgtatccaccatgtctcXgtacttctcaagtcccagcctgtgtatccc    |
| Methylobium petroleiphilum          | NC_008825_111353 | gaggatctgaatgccatccaccgccacagaXctgcaatgcatctcaatgggtgtctctg    |
| Methylobium petroleiphilum          | NC_008825_127316 | catcagcgtatctcggcttacttgagaXgatgacgacgactgttgaagaatcagttc      |
| Methylobium petroleiphilum          | NC_008825_15445  | ctaactgcgcgaaacaagtcctgtagatattXcgtctctgctgcccgaattgtgagcttgc  |
| Methylobium petroleiphilum          | NC_008825_37559  | caccgtgatgtgatcgtgcccttattaXcgtctgattatttccgtccctggcctg        |
| Methylobium petroleiphilum          | NC_008825_43176  | caatactcaactcgtggttctccgctgaXatagctacatcgtccatgctgaagtgacg     |
| Methylobium petroleiphilum          | NC_008825_52446  | ggatacgtatgacgtcgtgctgtgtcaXtagtcattgcttagcggattgtacgtatgc     |

|                                |                  |                                                               |
|--------------------------------|------------------|---------------------------------------------------------------|
| Methylibium petroleiphilum     | NC_008825_59607  | ctccgtgcccctcgtggtcacacaccggaXctgcttgcgactataaagtgtcaagag     |
| Methylibium petroleiphilum     | NC_008825_6707   | gttcgaagcgtacagtgcttccgatgccgXgatgcgagattctgactgttagtgattg    |
| Methylibium petroleiphilum     | NC_008825_84710  | cgatgagaagccgcttctagtgatgtccaaXggcgcgcatcttgaagtgttgcagtacac  |
| Methylibium petroleiphilum     | NC_008825_85887  | gtttcttctgccaattggcatagcttgcXgcacgcttaattccattgatccacaacc     |
| Methylibium petroleiphilum     | NC_008825_92478  | cggtatacttctgctcccttgatctctatXccgtttagccatccacatgggagactgtg   |
| Methylobacillus flagellatus    | NC_007947_11179  | ctgttcaatcatgacggctcacgcttgcXtaccatgatcatccctacttgggcagc      |
| Methylobacillus flagellatus    | NC_007947_22103  | ggtgccatactttcattctgtatatacXatcgctaatttctggccgctgtcctgagc     |
| Methylobacillus flagellatus    | NC_007947_41312  | catgcggcaatcgtgaattgtcatagtaXccttggccttcgatgtaactttccag       |
| Methylobacillus flagellatus    | NC_007947_50503  | ctaaggcatcatcaatgcagaggttggcXctctgttgataatacagcgtggaggtgc     |
| Methylobacillus flagellatus    | NC_007947_56709  | ccgatcaaacatacagcagataactaacaXtaccagtcaggaacatccaccactgg      |
| Methylobacillus flagellatus    | NC_007947_80326  | cagctccgtctctgagcaaccaattcttXtagcatcagccacgactgagcatcccttc    |
| Methylobacterium radiotolerans | NC_010505_106251 | ctgaggatccggccggcgatgaacattcgXcggaaatagtggtaccggtcagtaattcg   |
| Methylobacterium radiotolerans | NC_010505_13702  | ggcggtaataatctggttctgatgatXggcggagttctcgggtgtcagcctactg       |
| Methylobacterium radiotolerans | NC_010505_13734  | cccactttagagagctgacttgcctctcXttcctggacttactggtcatttgagctg     |
| Methylobacterium radiotolerans | NC_010505_1607   | cgtaagctatctcactgaccgcacagctgXactatcgactacatcttcaacggctcg     |
| Methylobacterium radiotolerans | NC_010505_161328 | cgattatgtcggccaagaatccagagcgXtccgcatcatcacctgttcaactacg       |
| Methylobacterium radiotolerans | NC_010505_165744 | ccgcatcaactgccagccaatgtatgaaaXtgcgctgctaattcgaggcagtagccttg   |
| Methylobacterium radiotolerans | NC_010505_168198 | ctgatccaaagttagcggccatcggcccgaXgatcaagtcaccatccgataaggcaaatc  |
| Methylobacterium radiotolerans | NC_010505_190534 | ctgacttgcagtaggagccgatccggctcXtgacgatgtcttcaagcgtcagattctg    |
| Methylobacterium radiotolerans | NC_010505_19867  | gatccggtaattgtcagggaaccactgtcXgaaatagtcctgggtgatgtctgggtgcg   |
| Methylobacterium radiotolerans | NC_010505_201746 | gtaagcccggatctccagcttccagctcXtccaactgctgacttctacagctatac      |
| Methylobacterium radiotolerans | NC_010505_41007  | cgccgagatactctgtgacctttattcaXttcagcagccctgcctctgttcagttgtc    |
| Methylobacterium radiotolerans | NC_010505_78471  | gcaaatcgaatctaggaggctctgatgggXagtacgcctaagcatcttcttccgcaac    |
| Methylobacterium radiotolerans | NC_010505_86897  | ggcttaggttggaaacaaatggcgaacagaaXaacgtcccttgcagcctgtgatacgc    |
| Methylobacterium radiotolerans | NC_010505_88566  | ctcgacatgcgctatttcacgccgaggttXataataggcagctgatagttgaattccgg   |
| Methylobacterium radiotolerans | NC_010505_90060  | ctttactcgcctgatcagagcctatcgtcXatgttccgctgtcacgatgcgtcaaaagg   |
| Methylobacterium radiotolerans | NC_010505_92924  | gtccacgacctatgcaatttctgggctgtXtttgggcatggagttgacctgggttgtg    |
| Methylocella silvestris        | NC_011666_105095 | ggcggcttactgacgaaataccagccgagctXcgtccgatttgaacagaaatttccgctgc |
| Methylocella silvestris        | NC_011666_1099   | ggaatcgaagctgttctcgatccttacgcXacatcctggccaaggttcggcttattc     |
| Methylocella silvestris        | NC_011666_112527 | ggcgcgatttaacgctacagctatctctgXcaatccgctctactgaccggcgctg       |
| Methylocella silvestris        | NC_011666_124280 | ggccataatttaaggacgtgaagaccaccgXaagtcctcctacatcgtcggaaacctggcg |
| Methylocella silvestris        | NC_011666_38484  | cagtcgaaatatttcgactacaagatcaatXacaatggcgacggctccttcgcaaagctc  |
| Methylocella silvestris        | NC_011666_46081  | gcctctaaagacaacagcaaatcaatagatXctgcgcctctctgcttctcctaatccc    |
| Methylocella silvestris        | NC_011666_55996  | cattatgccttgacctgctctgtttgaXcgcgaacaattcggcgctgcattaggaac     |
| Methylocella silvestris        | NC_011666_71251  | cgtattgagacgctgggttctccgacaccXatcaaggcacatttcaaaagtctcctgttc  |
| Methylocella silvestris        | NC_011666_75648  | gtagtattactgcttctagcctagatgtaXctgtgcgctgcacaatgacccagaagcc    |
| Methylococcus capsulatus       | NC_002977_13577  | gtacggtatgctgtcgtgtctgatctgacXgttcggagaggtggaaccttgcgaatgac   |
| Methylococcus capsulatus       | NC_002977_30437  | cgctcttctcctgcaattcaggtgattcXtctcgaatttctcctggacaaggcagacc    |
| Methylococcus capsulatus       | NC_002977_33865  | cgaatcctgacgaccgaaattccacatcatXtctcctcacttaccgtgaccggaagc     |
| Methylococcus capsulatus       | NC_002977_57499  | cgggtgctcgaatgcacgagaagatgcagXgagatcatggcatttctgatcaattc      |



|                          |                  |                                                               |
|--------------------------|------------------|---------------------------------------------------------------|
| Methylococcus capsulatus | NC_002977_65124  | gtcagggcatgctgggaaagtcgagcaggXtcgagttcgaacaccttccaatagaaggtg  |
| Methylococcus capsulatus | NC_002977_73157  | ctaaatttagcgcagatcgaaggcagggtcXtggttctctcgaagccgttgcatccag    |
| Methylomonas methanica   | NC_015572_122452 | cggtttgtcctgatggattgtcttgcggcXgtctgattcgaaattgggaacctgatcc    |
| Methylomonas methanica   | NC_015572_140490 | gcttcgggatcaacagtaccgttctctcaXtgcagatggaagccgtaactttattacc    |
| Methylomonas methanica   | NC_015572_159750 | ccatcaagacattaagtgtatcgacatcaXtcggtaactggatcagcgggttccg       |
| Methylomonas methanica   | NC_015572_168322 | ctggggcctatgcaagccgaccgaaagcXtggtaaacgggtcgcactttataataac     |
| Methylomonas methanica   | NC_015572_33689  | gcaacgccaaagtcttctgctgtaaacXttatccagactaacgataaccgtatcgcg     |
| Methylomonas methanica   | NC_015572_43122  | gtagtacagcgatttggctgcccgttagcXgcaagggttttactgaccataatcacg     |
| Methylomonas methanica   | NC_015572_70171  | gaactgcctgatccgcgtcggcgaaatccXgaattagatactttgatggccgcttattg   |
| Methylomonas methanica   | NC_015572_77321  | caattggacgacacctgcccgtctgtagtcXtgaaccaagcttctgatctattccg      |
| Methylomonas methanica   | NC_015572_94929  | gctatcctgatcggaaaccgatccaatagXcaattgcggcgtggatgccgtaaccgatc   |
| Methylotenera mobilis    | NC_012968_11574  | gacgtgctgccaagttggctcacaatgtXacagcgggtcttaactcaaaaggtgacag    |
| Methylotenera mobilis    | NC_012968_21892  | ccggtgggcttaattgatattgcagctttgXatgcggagtgtgtcctaagtgtagcggg   |
| Methylotenera mobilis    | NC_012968_26298  | gtcatgaggtcattgcctgatagccatcccXgcccgaataactgtatctacaggcatctcg |
| Methylotenera mobilis    | NC_012968_357    | cgtgacactgccaatcagtagttgctctXtgaagcattaccgtattcctccgctagttg   |
| Methylotenera mobilis    | NC_012968_3998   | cattgatattgatagatcactgaccgtcXtgcggtaaacgctacgggcaatagtggg     |
| Methylotenera mobilis    | NC_012968_52177  | gcgctagcacttaactgctcagctagttXtggatccatgatgatcagcgttctgctg     |
| Methylotenera mobilis    | NC_012968_62401  | gaaccacatactgacccgattcataaagXctcttctggcaatgagcgttaactgcggtc   |
| Methylotenera mobilis    | NC_012968_79944  | cctcttcaataacgtgcgagctgattaaXagctcacaatgagcatggtcagcttagcg    |
| Methylotenera mobilis    | NC_012968_84749  | caaccagtaaccaggtaaacatgcatXagagatggctgtgcttcatgtcacacaac      |
| Micrococcus luteus       | NC_012803_11026  | gctgtgcagtcggtgtagggtgatgacagaXgagtagagactcgtctgattctgagatg   |
| Micrococcus luteus       | NC_012803_1180   | ctcgggtcttctcagcgtgaagtcgaggaXcttcacgattagctgaatgacggatacg    |
| Micrococcus luteus       | NC_012803_16683  | gaatgaggttccactgtgagacacgacacXtgatgatggccgtcacatccgaatcgatc   |
| Micrococcus luteus       | NC_012803_1980   | gaaatgtctactggttccattctgacgcgXgcttcactgttctcagcgaatgacttgc    |
| Micrococcus luteus       | NC_012803_38115  | ctaatgggaacatcggtgcaggtattcgcgXatcctaactcagcttctctcgttccg     |
| Micrococcus luteus       | NC_012803_39815  | gtgctgattgatacatgtccatcacgaccXcggcttctgatacgtggacgagcacattc   |
| Micrococcus luteus       | NC_012803_74435  | ctgaagcttctgattgtggatgtacaagaXcgcgtcagcgttctcagactggagactg    |
| Micrococcus luteus       | NC_012803_76203  | ggagggaactgtaaactgttcaacaagcaXtcacgttggtaaacggagttgccacctg    |
| Micrococcus luteus       | NC_012803_78105  | gctcggttcctgtacatgatccacaggtagXtctcctgacgtgttccatctctgacg     |
| Micrococcus luteus       | NC_012803_82140  | gaatgcgaaacttgggtagaacaatcattXggacttaaggcgtgctgttccgctcaag    |
| Micrococcus luteus       | NC_012803_82149  | catagtaattccgtttaaagtaggcaaaXcgcgggagcaacctgcatacagcaccac     |
| Microcystis aeruginosa   | NC_010296_106537 | gcaagcattcgagcgtggatgtctgcatgXtttattcgcgtcacaacgaaccggcttg    |
| Microcystis aeruginosa   | NC_010296_10945  | cgatagggtaaaagtaattggttcatcggXaacgagtaggccaagtggtgccagtagcac  |
| Microcystis aeruginosa   | NC_010296_125250 | gcaatttgggttatttgcctcgttgcXtccgattggccacatttcccgaattctgg      |
| Microcystis aeruginosa   | NC_010296_136765 | gtcttctgcctcgcgcttaatacaagcgaXccgggtcctccgattatctgagtaatttc   |
| Microcystis aeruginosa   | NC_010296_145919 | cgcaagtctctgctcagctgtgcttatcXccgggtcaagtggaaattctggcaatgtac   |
| Microcystis aeruginosa   | NC_010296_157619 | caaccgacattcattcacctgacggtctgaXttgctgtggcggattgttcatctctg     |
| Microcystis aeruginosa   | NC_010296_166546 | catcgcggagtattatcttagcgaagatXtccggctctggattgtccgagaagcggc     |
| Microcystis aeruginosa   | NC_010296_175289 | cctatcgagccttccagcgtcatctaccaXtggccgatcgaatgccttaaaagcaag     |
| Microcystis aeruginosa   | NC_010296_194715 | gatacacttctgcacgggatcgtgtgaXaatctcctcactggtgcaaacgcttaac      |

|                           |                  |                                                              |
|---------------------------|------------------|--------------------------------------------------------------|
| Microcystis aeruginosa    | NC_010296_22783  | cataattgccctagcagcttgaatcgtccXaagcggttactcgtctggtggaaccgg    |
| Microcystis aeruginosa    | NC_010296_40284  | ccgtctggctcggatgcatcaagcacgaXaagaggaaatfatcaacgcaaatgg       |
| Microcystis aeruginosa    | NC_010296_467    | gggattccctaaagctatgctcacccaacXaacaattgggttatctccctattggc     |
| Microcystis aeruginosa    | NC_010296_53076  | ctatgtacagatcggttggggcgaattatXtggttggtgccattaccgctcctgtcc    |
| Microcystis aeruginosa    | NC_010296_65338  | gtaaggttgggctgggattctggttaactXaccaactgacggcaatggttagtaagtcg  |
| Microcystis aeruginosa    | NC_010296_75420  | cgaattagaactgttagtgataccgccggXgagcgtaccggtcaggacgggttaag     |
| Microlunatus phosphovorus | NC_015635_114970 | ctactccatacagctacgccatttatgtccXatcgtcactgtggtcacaggttctcac   |
| Microlunatus phosphovorus | NC_015635_123069 | gttacctgtgagaagcctgtacatgctgctXgtgacgaagtgccatagcgtccgatgatg |
| Microlunatus phosphovorus | NC_015635_137598 | cgcttcagtaacaccaagagtgttcagaXcttgcctcagttccatgggaatcattgaagg |
| Microlunatus phosphovorus | NC_015635_156378 | gcatcacgaatccctgaactgatgcgaacaXattgttgcctccctaccagtatagcc    |
| Microlunatus phosphovorus | NC_015635_174648 | catgtcaaggacgcggaaggacgttcttXcattccattagtacacgggacgtatcaggc  |
| Microlunatus phosphovorus | NC_015635_20619  | gaaattgtatcagagctccaagatagcgXaccggcgtgctcattgctggaatctcg     |
| Microlunatus phosphovorus | NC_015635_41563  | ctggttgggtgctgtatgtcgtcgtcXgcatctcgcgaatgagcgaataaaactg      |
| Microlunatus phosphovorus | NC_015635_4950   | gtgaacataattcagtagcggcgtacggaatXcgtgctcagtgatccgtacagtgatg   |
| Microlunatus phosphovorus | NC_015635_55759  | gagctcatgtcttcgacggccgataccaXttcctcagttgtctgctggttgaccatc    |
| Microlunatus phosphovorus | NC_015635_63932  | gatgtgcatgacattgtgctgacgtgtagXgattagtagcgccaattggcgtggagcc   |
| Microlunatus phosphovorus | NC_015635_90502  | gaaactgaccatcgcgatctgtgtgtXccatctctcgtacttgcggtcacctttac     |
| Micromonospora aurantiaca | NC_014391_103750 | gcaccctgcgtgtgtgcatagatgtgtttXagatgatcaagaatccactgtgcctctgc  |
| Micromonospora aurantiaca | NC_014391_187182 | cagtagctacactcctatatttctcttXcgcagcgcgtcaggagtacgaagtgtcc     |
| Micromonospora aurantiaca | NC_014391_44529  | cgccgattgagatggtttgaccacagcatgXagaatcatttcggcgcacagtgagcag   |
| Micromonospora aurantiaca | NC_014391_62431  | cctcgtgatcaacagtcaccatgggtgXacctacatgcaatgactttaacagctgc     |
| Micromonospora aurantiaca | NC_014391_64322  | gcaattcaattcgttctcgtgccagtXaggattcgtcaaatctcccaccggtgatc     |
| Micromonospora aurantiaca | NC_014391_891    | gtgcaagtgcgatggcaagatgatctXgcgttattcggcagcgtctatcaggcgg      |
| Micromonospora aurantiaca | NC_014391_96994  | ccaagtgcgatgacgatgagctgtgggtggXggttctccttgaataggcgttaagttgg  |
| Micromonospora aurantiaca | NC_014391_9794   | cacgtcaacatagttgatgaccagacagcXgagctcggggtttgtagattaccaacgc   |
| Micromonospora aurantiaca | NC_014391_9845   | catcgagataaagaacccttaccgcgcXcgaagactttgctcggacatacctaagac    |
| Mobiluncus curtisii       | NC_014246_15840  | cctggtgcgcgagtttccaccgattaccgXcactaatctgacccaatcgtataaaagc   |
| Mobiluncus curtisii       | NC_014246_29837  | cctaagcagatgcccaaacatcattgctXagcatgactacggcgcggttagcgataagc  |
| Mobiluncus curtisii       | NC_014246_35481  | gcttatgagcggatttcacaacgttgcaXcgtccctgctcgtcagcggactaaactag   |
| Mobiluncus curtisii       | NC_014246_45780  | ctgccgattggattgagacatcctcaXgagcgtcagtgattcaatggagccaacg      |
| Mobiluncus curtisii       | NC_014246_50681  | cgacgagatggtctgatgaccattaacggXtggaaatccctggcgtatgctctgtctg   |
| Mobiluncus curtisii       | NC_014246_57155  | ggataattgcgtcatcaggctcaagatccXgttctgcaatctgagctagcagctcctgcc |
| Mobiluncus curtisii       | NC_014246_59968  | caaacctcttaccgtcagtcgaagcttXacctgctcattcttaacgcccgagattgc    |
| Mobiluncus curtisii       | NC_014246_63958  | caccagatacacgtgtagcgatccgtataXgtgccactgctgttatccagattcactcc  |
| Mobiluncus curtisii       | NC_014246_67812  | ctgcggatgatggtattagagctgttcgcXcgcgatacgcagattcgtcttctgc      |
| Mobiluncus curtisii       | NC_014246_8420   | ctcaagaccaacaatgaataccagtcgaaXgcctgcctttagaacggatgatccctg    |
| Moraxella catarrhalis     | NC_014147_12039  | ggcattaatgatctgcagatgagcgtaccXtgtactgttagctgctccagcttggc     |
| Moraxella catarrhalis     | NC_014147_133    | ggcgtcagatactgattggctgacttccXtggactgctggtgagggcagtagctctc    |
| Moraxella catarrhalis     | NC_014147_19310  | gtcaagatagagccgttgcgcgggtaaaXaacagattaatgtaagtgatcccaatgg    |
| Moraxella catarrhalis     | NC_014147_22472  | cggagctggtgatgccctaacagcgtagXatgatgagagcctgcttagtgatgcaag    |

|                             |                  |                                                                |
|-----------------------------|------------------|----------------------------------------------------------------|
| Moraxella catarrhalis       | NC_014147_2316   | cactggatftaatgccacggcaagcattcgXgacagcattggactattggacaaggtacg   |
| Moraxella catarrhalis       | NC_014147_28883  | gcaatcgcgagcaggtgataaggtggcccttXgttgataattataatgccgaacacgctaag |
| Moraxella catarrhalis       | NC_014147_31399  | cacgagatgcgtatcattgcttggatcatXgtggctttggcagtgagcaatcgcagttg    |
| Moraxella catarrhalis       | NC_014147_33976  | catttgacagtgcttggcgacatgtgattXacgcatggtgcaatctgcctgtatcaatgg   |
| Moraxella catarrhalis       | NC_014147_36652  | gcacaagtcacaatgactgtaaacctattgXtgcatttgaaggcagcctcaagaccatcg   |
| Moraxella catarrhalis       | NC_014147_43126  | gctgaacagctactatgcgcttggcagtcagXtggctacaagacagcctagcacatcgatc  |
| Moraxella catarrhalis       | NC_014147_4708   | cctactcaccagagtttagcacaccctatXatccgatgggtatcgattgtattaccg      |
| Moraxella catarrhalis       | NC_014147_51218  | ccacgcatcaacattgccgaatatgccaaaXgccacttcggcaggatcatcaacctcaatg  |
| Moraxella catarrhalis       | NC_014147_61937  | ctatgatagtgccctgaccctgtgacaatcgXtgcctacgactgtcaacgcagattatccg  |
| Moraxella catarrhalis       | NC_014147_7187   | ccaaagacactgtggagacttattatctXctagcgggtgtggtgcgcaaaagcagatcg    |
| Muricauda ruestringensis    | NC_015945_127460 | caaagcggattcggataaggactaccaccXgttctactgcaacagctccttagcatgggc   |
| Muricauda ruestringensis    | NC_015945_17536  | ggaaacagcatcatggacatttgcattaateXtattattggagctgccgtctctgttgcg   |
| Muricauda ruestringensis    | NC_015945_29594  | cgtcggcgcaatagttatttctccgatgXaatcagagtaagtgtagaagtacactcgg     |
| Muricauda ruestringensis    | NC_015945_48085  | cccagttgcgtacaggtgtaacttgtgtgXgtaggtgtaactgccacgggtgatttcg     |
| Muricauda ruestringensis    | NC_015945_70546  | cactccgggcaatacgtaaccttagtattacXgataatggcggtcatcatgaaatcagcc   |
| Muricauda ruestringensis    | NC_015945_79601  | gatatacctactacgggttctatcacagctXgcggtgttttcttggcgagcgaatgataac  |
| Muricauda ruestringensis    | NC_015945_8636   | ccatggaaagtccttggacgatatagagXagcgtgctacccttggtagattagcaacg     |
| Muricauda ruestringensis    | NC_015945_89840  | ccaataagaattgaacgtaaccatggtggXatgccgaatggatgcggccttcttaggg     |
| Muricauda ruestringensis    | NC_015945_92689  | ggtggcctattgtccaagcgaacgctgcccXctattggtcttctgctgatccctgtttacg  |
| Muricauda ruestringensis    | NC_015945_98697  | ctcaacaatgggtcggattgatacttgcaaXtgtcttaaccggccttcaagaatttgac    |
| Mycoplasma hominis          | NC_013511_4330   | gcgatgcgtaaacattgatggtgcccgtgXaatgttgattccaccgtgatggccttacc    |
| Nakamurella multipartita    | NC_013235_130593 | gttggcttaccgagacgtgtcacgacggcXccattgaaacctcatgtactgtagtagagc   |
| Nakamurella multipartita    | NC_013235_145472 | gatcattgaacgtgcaacaagtggcacgctXcatctgactgctgacggagccgacattgtc  |
| Nakamurella multipartita    | NC_013235_154571 | ggcattcgactccgctacagaattgggaaXtttgcattcctgtatgttggatgtgggccc   |
| Nakamurella multipartita    | NC_013235_16841  | gaactcccacctctataactgagcXcaattgccgggacattggcgtgcctctg          |
| Nakamurella multipartita    | NC_013235_171274 | gtccgagtttactccactcagatgaaagccXgtcgccttggatcatgctggtactacc     |
| Nakamurella multipartita    | NC_013235_180182 | cttgatacttcaagcagcacttgataaaXggcatggctctcttgggtgagaaatggtg     |
| Nakamurella multipartita    | NC_013235_199534 | cgtgtcaatgaacgcgatgtcacggtttgXtggctacacaactatggagcgcgacatgc    |
| Nakamurella multipartita    | NC_013235_33069  | gtacgtactgctactgatctcggtttctXgctgtgccttggcggagcaattgattc       |
| Nakamurella multipartita    | NC_013235_55720  | gagatacctcaaacgtgtagttgatctcgtXtgttgggtggtattggacacggctggcggg  |
| Nakamurella multipartita    | NC_013235_71300  | gaccacggtttggacctccgtaacatgXatgacagcagatctgcttgcgatagtgacg     |
| Nakamurella multipartita    | NC_013235_72119  | ccgaactccagtgccctaggagataatcgagtXtagggcgtatagacgccaggaatgtg    |
| Nakamurella multipartita    | NC_013235_77929  | ctctactacgtcgaaccgaagtaaccgagXgacacatcgcggtatgtctgacattgaag    |
| Nakamurella multipartita    | NC_013235_939    | gcagcgaaccactactgcccgatcattcatXctcttggatgaagaagccagctcagac     |
| Natranaerobius thermophilus | NC_010718_101704 | cgataatgctttgtcacctgccattctatcXtctagttagcgggagataaaccagcctc    |
| Natranaerobius thermophilus | NC_010718_105364 | gcccattaggacctccagagtagtctatcXgtcctctgataaacataggcagcttctg     |
| Natranaerobius thermophilus | NC_010718_1167   | gtgtagttaacagagcttccaagctgctgXatgatgctgaggtacttcaaacggtcatg    |
| Natranaerobius thermophilus | NC_010718_15322  | cacttatgggattgttattgccggtggtgXgcccctcttctgcccgtgaatacgttc      |
| Natranaerobius thermophilus | NC_010718_32606  | gtgctggtgcacctctactgtttctgtatXcttgcceaatgaaattgaagggctccg      |
| Natranaerobius thermophilus | NC_010718_38514  | gcttctgtcggagatctaaaggatgaagtXgggaaacacaccaagaatgtggtgggttc    |

|                             |                  |                                                               |
|-----------------------------|------------------|---------------------------------------------------------------|
| Natranaerobius thermophilus | NC_010718_43888  | caatgctttagtagagaattagagattggXatgtcacttggtggtgccgaggagatcac   |
| Natranaerobius thermophilus | NC_010718_61074  | gagccaagcatgggttgactacctgggtgggXtcaaagtcaatcctctgcatgattggc   |
| Natranaerobius thermophilus | NC_010718_80690  | ctagaagtaggtaaggacggagatgtgctgXattgctgaaatgcaccagtaggtgac     |
| Natranaerobius thermophilus | NC_010718_91326  | ctgacctgctcttaagtctccaccgggXtgttgactctctgtaactatctggctg       |
| Natranaerobius thermophilus | NC_010718_98701  | cttgctcagacagtgtctctctctacaXatactctccactgctcactcagggcattc     |
| Neisseria lactamica         | NC_014752_10037  | ccaagcgcgcgatattatcaatacgtctgXcagtaatcattgtccaactcaagccctg    |
| Neisseria lactamica         | NC_014752_28767  | catacgccaccctgggacaataaccattgXcaaagagattgttaggcacatggagggg    |
| Neisseria lactamica         | NC_014752_30427  | gattaagcgcatccatattggcgcaagccttXagacaaccacattgggcatcacagcgtcg |
| Neisseria lactamica         | NC_014752_35032  | cgtaaccaaggacggcttggaaactgatgaatXaagcccgttggcgcgctgcatgtgaag  |
| Neisseria lactamica         | NC_014752_43313  | ccgtcttctgttgagcacaacgaagaataXttaaaccagatagcgcaacgcagactatc   |
| Neisseria lactamica         | NC_014752_44576  | cgctagttagcctgtaatactcaccggttXtgttgccaactgaggataaagtcgtaaac   |
| Neisseria lactamica         | NC_014752_55847  | gcttgatttcttattccggattgaccaccXcctgtcctgtatgaacagaataaccggc    |
| Neisseria lactamica         | NC_014752_61586  | cataatgatgcctgttcatagctcatcgcXgcccgtgaaccatcacataatgccgtctc   |
| Neisseria lactamica         | NC_014752_67369  | cctgttttggaattcttggcgagggcgXagcatggttggagttctgcgccttgtag      |
| Neisseria lactamica         | NC_014752_73924  | gaatccgcatccgcaccgaccgtaaatXtgcacaatgccgattgatcaccgcatacg     |
| Neisseria meningitidis      | NC_017501_17840  | gcggtaattgggtagtgccgccttaactXcggatggtgccgaggttgagattatgccg    |
| Neisseria meningitidis      | NC_017501_20091  | ccttaatgcctaacagctgccccggcagXtggtaatgggtgacccctgtcttatgtg     |
| Neisseria meningitidis      | NC_017501_2668   | ctttaatgggttgggttccgtggcgaggaXttatgaaccaaaaggtgatgcgttaccgc   |
| Neisseria meningitidis      | NC_017501_45700  | cgtaggtaggtgtatcgacgaacatttXgctccacgcctgagttcttaaatggg        |
| Neisseria meningitidis      | NC_017501_56633  | gcagactgctggcccgaattgagttgXtgggaacaggtgctttcaatgccgaagacg     |
| Neisseria meningitidis      | NC_017501_61362  | ggcattgcctaagttgctttcaagctgccXtgggaagctattaaccaatgctccaatgc   |
| Neisseria meningitidis      | NC_017501_61531  | cgctcgtgtgtgcattaagatcggtataXgctgtagcatctactgttgagcgttacc     |
| Neisseria meningitidis      | NC_017501_61563  | ccttgctggaactgtataggtagtgccaXatgctgtgtattgcctaattggcggtg      |
| Nitrobacter hamburgensis    | NC_007964_112477 | gcttgctctgggaacagacttgcgttccXttctgtcatgatactggccttctcggtg     |
| Nitrobacter hamburgensis    | NC_007964_121215 | gaaagcgcgaatgaactgccgagcaactgtXtgcgcccctcggtgcaaaagtacgttc    |
| Nitrobacter hamburgensis    | NC_007964_127152 | cattcgtacgcggaactgattgcatctctXttctgctgctatcgccaacgacgaaagc    |
| Nitrobacter hamburgensis    | NC_007964_138433 | cagaagtctgctacaactgacaagtgggXggccgacatctgatagcaagcagctgccc    |
| Nitrobacter hamburgensis    | NC_007964_146647 | ctgatgaaagctggcgtcgtctctctgatXgaactcttccgggtgctatttcaaatgc    |
| Nitrobacter hamburgensis    | NC_007964_18225  | gatgttcttaggcgaggttaatatccgatXttgcccgaacggcgaggatttctgctcc    |
| Nitrobacter hamburgensis    | NC_007964_25407  | ccctcagcgttgccttgcattgctgtaXtgcgttatcgtcattgttcgttccatg       |
| Nitrobacter hamburgensis    | NC_007964_282    | gtgaaccatattctgacattggctgaacXcggcgcaagatattgcaattcgtgtgc      |
| Nitrobacter hamburgensis    | NC_007964_30438  | ggtagtcgagaagctctgaactcttggcXgagatagccttgataaggctgggcacatc    |
| Nitrobacter hamburgensis    | NC_007964_35424  | gataagcctgctccatctctgactgtgacXttctgcaacaagacattgtgacgcaatc    |
| Nitrobacter hamburgensis    | NC_007964_40764  | gctcggcattgatgaactgggtgcgacaaXcaaacagcaaaagtcgagagaacgatgccc  |
| Nitrobacter hamburgensis    | NC_007964_57712  | catcattgaaataggccgggaattgcgaaXactgtggtcggagcaggagttgttccag    |
| Nitrobacter hamburgensis    | NC_007964_60159  | ctcaccgactggatgaatcatttctgcccXgcactctatgaatccttattcttattgg    |
| Nitrobacter hamburgensis    | NC_007964_63446  | ccggacagaacggaattcgcattgctgataXgcccgtatttgaacaattgttggcgttacg |
| Nitrobacter hamburgensis    | NC_007964_7560   | gaaacagtaactgtggttcattgaccggXgcaagcgccggatcaatcttctgttggcg    |
| Nitrobacter hamburgensis    | NC_007964_79819  | ggcgaattccgtgtgctgaatccacttctXcagcatcgtggacaataatcttcccgatgc  |
| Nitrobacter hamburgensis    | NC_007964_96156  | caccacagagggcgaacaatttcagcaagXtattccaggtgtgtttagctcagagaac    |

|                          |                  |                                                               |
|--------------------------|------------------|---------------------------------------------------------------|
| Nitrobacter hamburgensis | NC_007964_99456  | ggtttcagaggttcagcgcgctcaggaaxgctttcagcttcacatgtaagtcgatgccg   |
| Nitrobacter winogradskyi | NC_007406_113270 | cttctcccatatccattaantaaggaagcXaaggccaccgttgattgcccgcgatggcg   |
| Nitrobacter winogradskyi | NC_007406_20681  | gcacatttagacgagattgtcttgaatgcXcgtcagattattggaacctgcaacgcgc    |
| Nitrobacter winogradskyi | NC_007406_29249  | gaggcggagtagtgcatcgttatgggtaatXgctcttgatgctggttgaacgagcgcac   |
| Nitrobacter winogradskyi | NC_007406_32253  | gacgctccgcctctgaaggcaagaatacXtcctcaagcagcgcaggacgaataaggttc   |
| Nitrobacter winogradskyi | NC_007406_447    | cattatcttacgcacatagagcggatcatXtccggcgcactccttatatcgttcgcgcg   |
| Nitrobacter winogradskyi | NC_007406_49095  | gaagagcgttaaggctcccgatgtaatctXatgtcttacagcaaccgtcgcggtatgac   |
| Nitrobacter winogradskyi | NC_007406_53757  | cgtaccattgaccggatcggaatgacgcaXaccggcaacgatcagaacaatcgggttg    |
| Nitrobacter winogradskyi | NC_007406_63091  | ccaagcagatggaatgatccctcaacacgXtccgcgcccaatcagcttggctccatg     |
| Nitrobacter winogradskyi | NC_007406_72003  | cgtattgtctccatattgcgatattgtcgcXgtttctacatctatgtcccacacaccg    |
| Nitrobacter winogradskyi | NC_007406_77632  | cgatcaaatgaagagaactcgtcacgctXcgtcgtactcgtctcaggcgttcgctgcg    |
| Nitrobacter winogradskyi | NC_007406_88566  | ccgggtgaactacgatttcaagaatcXtagcgaaggcgggttgcatctatcgg         |
| Nitrosomonas sp.         | NC_015731_107116 | ggactatcgggttacgaacaatcagactggXtctgatcagcaccggatgtggtcatctc   |
| Nitrosomonas sp.         | NC_015731_113627 | gatcacaggccacatgtgattgtaggtctXgctctgttgattgtgcaaacccgttg      |
| Nitrosomonas sp.         | NC_015731_118876 | ctgcttccatttgcgtgaccagatgtctXgccacataggtaataccacttccgccgc     |
| Nitrosomonas sp.         | NC_015731_126050 | cggcatgggcgctacgcgaatcttgaatXctgctcaaccgattgctgctattgaacac    |
| Nitrosomonas sp.         | NC_015731_14303  | gtgacgcataattactgggatcccaatcXttgacaacatcggattcgtgtgctgag      |
| Nitrosomonas sp.         | NC_015731_22771  | ccgatggaatcctgaagtcaaacggttatXaggatggagacagatccaggttatcccg    |
| Nitrosomonas sp.         | NC_015731_30794  | gacattatcctccagccgatttgttcXgcaaacgctgaccggatcgcgatgtcc        |
| Nitrosomonas sp.         | NC_015731_36837  | ccggcagcttagatccagaagatccgtggaXttgcaattctggcacgtaagaatgataagc |
| Nitrosomonas sp.         | NC_015731_46599  | gccaacggacaaggtaaccggcaattgtXgacaaccattgcccgcagattgctgaccg    |
| Nitrosomonas sp.         | NC_015731_57220  | ggcccaccgcttaccgctacacgcgccacXttgccatagcagaataatcttgcattg     |
| Nitrosomonas sp.         | NC_015731_63813  | gcgccagttcgtgaatcattcattcctXcacatcgggattctggcgatttcccacg      |
| Nitrosomonas sp.         | NC_015731_72     | ggttggccctatcgcagccggttggataXaattaatcagtgctggcaccgatggacac    |
| Nitrosomonas sp.         | NC_015731_73368  | gcgtgctactcagttatagatccggccaatXgttactgactttactagcaagcttgcgcc  |
| Nitrosomonas sp.         | NC_015731_80634  | ctgctatcacctggaatgaatagaacaaggXtaagcaagcccgatgatcagatccag     |
| Nitrosomonas sp.         | NC_015731_92121  | gactgttgattatgaatagatggcaggaaXtatcgttcggcttctaccctcagtcacg    |
| Nocardia farcinica       | NC_006361_536    | cattccagagagcgcgctgcgcctgctcXataagggcttacgtaattcctagatcctg    |
| Nocardia farcinica       | NC_006361_21445  | gatatttggtaggcaaccctatctcagtcXggttgctgcacggctgcctcacaggctccg  |
| Nocardia farcinica       | NC_006361_42406  | gaatcggagacaccgtggaattcttggcXttacggctacgtcgtactgctggcgatgag   |
| Nocardia farcinica       | NC_006361_52779  | gcgctgaggtgtaactattggaacagttaXgatcgatgatctgtcgggttgacctactc   |
| Nocardia farcinica       | NC_006361_57039  | gtgtgtcagccctcgtcctcgcctcXtaattggtatcgcggcagcgggtatagcgc      |
| Nocardia farcinica       | NC_006361_61135  | gcttccgtcgaagggaatcgcacatgaaacXtagtgtgtgatcagcgcgaggtaaagc    |
| Nocardia farcinica       | NC_006361_74330  | gaagtcttcggagtacacagccaaccgcaaXcgtatgtactgaccgctccagctacaactg |
| Nocardia farcinica       | NC_006361_74646  | gagcctgacggagttcgttctggtgatcgtgXgtcccgcactcctcaaaagattggttac  |
| Nocardia farcinica       | NC_006361_84702  | gagaagcaggattgatcgttcaatcgaagaXgcaagctggcgacggattgctagtcggg   |
| Nocardia farcinica       | NC_006361_88196  | ggttcgatgagatgattcacagtcattctXctcggccatgacttctctcatcaccatc    |
| Nocardia farcinica       | NC_006361_106414 | gtaacaggaacttctatccggcgtggcggXggccgagcatacacatataatgagacaaccg |
| Nocardia farcinica       | NC_006361_113125 | cgctcctttcagaatgctgacgcaaaXtcttctcatctgacgaccggcaacctgtc      |
| Nocardia farcinica       | NC_006361_128985 | ctctcgaccagagacgaaactcgtatgcXtccactcggattgacgactggcgatagc     |

|                                 |                     |                                                              |
|---------------------------------|---------------------|--------------------------------------------------------------|
| Nocardia farcinica              | NC_006361_137209    | catgtcgaccagcggttgaagcgactgttXcagttggcgcttccaggatgtcttccg    |
| Nocardia farcinica              | NC_006361_139477    | ggagccgctaccagcgggaatgagaggtgtXgcatgtatcgaaccaggctgcaattatc  |
| Nocardia farcinica              | NC_006361_152093    | cgctgtccgaatatatgacgaactattcgaXccttggccctggacggaatgatcaagc   |
| Nocardia farcinica              | NC_006361_169485    | ggttgttctcggcgctggcagtcgtattXacgaattgaagtactggcgatcaattcg    |
| Nocardia farcinica              | NC_006361_172249    | cggcatacctgctgttgattgaagacgggtXatccggacgaatgaccgtgcatctagagg |
| Nocardia farcinica              | NC_006361_185087    | gtattcgtgaggtgccttccgatataaccXgacctaattggatgacccactaagtcttg  |
| Nocardia farcinica              | NC_006361_197565    | cacggtcgtgccactgcaacacttccaccXgagatgaatgacgtaatcctctcgtatgg  |
| Nocardia takedensis             | BAGG01000000_886    | gaccgggagggccgacatgttcgaacgactXaccataaagtftacaggcgacaacatccc |
| Nocardia takedensis             | BAGG01000000_5640   | ggtgaaccggctcatgaccgcaattcaatXgtcगतगगाातgcagaccagtaacgacc    |
| Nocardia takedensis             | BAGG01000000_7126   | gagaccttgacgattatgtggacgagcagXgtcggatgaagataggtgatgacggc     |
| Nocardia takedensis             | BAGG01000000_20353  | cggattcgaagcaatcggaaagtgcgctgXacttccatctctccggtagagcगतatgg   |
| Nocardia takedensis             | BAGG01000000_24240  | ctttggaggtcgtgtgcgaccagcgacgaXccttacccttggattaggtcagctttac   |
| Nocardia takedensis             | BAGG01000000_28824  | gccatcgccgaaccttacttccggagtaagtXgtctggccgggatctcगतatgtttcac  |
| Nocardia takedensis             | BAGG01000000_37739  | gtgaaccttaccgataagtactctggtgaXcagaagagattcacagacgccgacacgac  |
| Nocardia takedensis             | BAGG01000000_44967  | gacagattcgaagatgagcgaacataccgXattcctcgggtggccगतatgactccg     |
| Nocardia takedensis             | BAGG01000000_62253  | cttatccगतgattcggaggtctccgaatXtcgacctggaactgccggtcगतtctgtgc   |
| Nocardia takedensis             | BAGG01000000_71199  | gtagcaaaagaacctcatcagtacattcgXcctगतggctccgagccgataacctggcg   |
| Nocardia takedensis             | BAGG01000000_73089  | cगतcacactggttcggttatactcgगतXtgggaaacgaggtगतcगगagcgcctgg      |
| Nocardia takedensis             | BAGG01000000_91700  | cgaatagcccagtcaccaacggtttगतXgcगतagcगतctcगतttcacगतatcg        |
| Nocardia takedensis             | BAGG01000000_116134 | gtccatatcgccgaacatcaattccगतXgcggcggttccगतaatगतcगaaacc        |
| Nocardia takedensis             | BAGG01000000_132229 | cगतtगतgaaatcgctatcacagaatgacXgcगतगतcगतggtccacgcggaacctc      |
| Nocardia takedensis             | BAGG01000000_164268 | cagtacaactcccggcacगतगतctgXaccggtaacattगतcaccttcaaac          |
| Nocardia takedensis             | BAGG01000000_182582 | गतcaaatccगतगतacagggattccgaXgctगतcगagacगतगतctccgcgag          |
| Nocardia takedensis             | BAGG01000000_188020 | caatatacatcaccagtataataacttaagXtगतगतgtagcccgcgcatcatccggg    |
| Nocardia takedensis             | BAGG01000000_202259 | गतcगतacggtcgacctgtgcगतcगagcaXगतगतcgcgacctggttccgaaatc        |
| Nocardia takedensis             | BAGG01000000_217670 | ggtccगतगतcगagcgaccttaccगतtaXgगतccगतcगagcaatगतगतcगतtcc        |
| Nocardia takedensis             | BAGG01000000_260434 | ccgttccaactcgaccattcgacacacctXgtcगतctगतगतcgcgacctctccgtc     |
| Nocardiosis alba                | NC_018524_101483    | gtgtcttctgggaacgtgtcgccatttcXttagtगतगतcattcttgaagatcggg      |
| Nocardiosis alba                | NC_018524_102721    | gtगतattgggctggtctacctacggaggtXgtगतगतगतगतगतगतगतगतg            |
| Nocardiosis alba                | NC_018524_112915    | gagcगतगतगतगतगतगतगतगतगतगतगतगतगतगतगतगतगतगतगत                   |
| Nocardiosis alba                | NC_018524_112919    | cggtcagगतगतगतगतगतगतगतगतगतगतगतगतगतगतगतगतगतगत                  |
| Nocardiosis alba                | NC_018524_15798     | gctttgggaatacttggtcगagagagattcXacaccagगतgaaagtaccगतगतcccc    |
| Nocardiosis alba                | NC_018524_186017    | gacगतcगतगतccccacgcttgगagXtcगतcattttगतगतगतगतगतगतगतगत          |
| Nocardiosis alba                | NC_018524_60929     | cgaacgtcctctattगतगतcaccगagXtगतcaccggcगतcacccttctctac         |
| Nocardiosis alba                | NC_018524_66403     | cgctगतगतगतगतगतगतगतगतगतगतगतगतगतगतगतगतगतगतगत                   |
| Nocardiosis alba                | NC_018524_77469     | gttगतगतगतगतगतगतगतगतगतगतगतगतगतगतगतगतगतगतगतगत                  |
| Nocardiosis alba                | NC_018524_77861     | gctगतगतगतगतगतगतगतगतगतगतगतगतगतगतगतगतगतगतगतगत                  |
| Nocardiosis alba                | NC_018524_9617      | ggagcgccगतगतगतगतगतगतगतगतगतगतगतगतगतगतगतगतगतगत                 |
| Nocardiosis alba                | NC_018524_96296     | cगतगतctctggttcgcgगagagcगतXgगतगतगतगतगतगतगतगतगतगतगत            |
| Novosphingobium aromaticivorans | NC_007794_106018    | caagcggaatcccatttctcaagtcXgtगतगतcताagggcगतगतगतगतगतगतगत       |

|                                 |                  |                                                               |
|---------------------------------|------------------|---------------------------------------------------------------|
| Novosphingobium aromaticivorans | NC_007794_116232 | cgccgacattgcggttccaatgaaattctXcgaatgtcgttgcttgaccgaaacgtgcg   |
| Novosphingobium aromaticivorans | NC_007794_16567  | gtgcaggagactgttcgccgctccaaagXgtgaattcttattggagagtacgggaag     |
| Novosphingobium aromaticivorans | NC_007794_46273  | gttcaacgatgtccagcacagtcattcaXgttcagcgacctgtgttgaggtcacgac     |
| Novosphingobium aromaticivorans | NC_007794_50848  | ccacattcaaaagcaaggtgggtgcatgXccgtcagagatcttactgtcgaagagattg   |
| Novosphingobium aromaticivorans | NC_007794_71998  | gccggctgactctgacgagccaaatggtXgagcaaatgcaccgtatcgacgttattg     |
| Novosphingobium aromaticivorans | NC_007794_79380  | catgaaatcgtggcgcaattcagacagttXcgggcaatgcgagccaatcatagacgaagc  |
| Novosphingobium aromaticivorans | NC_007794_93134  | cgtaattcgtgtcacatattcgtcatttXaaatcatgccttgtgacggctccgtcacc    |
| Novosphingobium aromaticivorans | NC_007794_943    | gatgaatgcttaacggccgttcagaaacXccgacaattacggtaacgaaagtgcag      |
| Novosphingobium aromaticivorans | NC_007794_98621  | gtcaatggcaaccgcatgaagcggatttXaagtacttcccaagctgcttggagtatg     |
| Oceanobacillus iheyensis        | NC_004193_105090 | gacattacgacgatggctgtaatacgaagXaagacagaccgattgctaaccctgaacc    |
| Oceanobacillus iheyensis        | NC_004193_113482 | ggtgaacggccactgtcattaagtcctatgcXtcttctacttctcaatggagatgattgc  |
| Oceanobacillus iheyensis        | NC_004193_117895 | gtgcctgtgctccatccctctgaacgtXgaaatctacacgatcagcaatcaaatg       |
| Oceanobacillus iheyensis        | NC_004193_119958 | cactcatcgcattctcctcctaataacaatXtatgtggcggtcagcatcattccacgatg  |
| Oceanobacillus iheyensis        | NC_004193_39924  | cctgacgatactgctctgttgatgtgacaXatggtggaagatgtcagaagccaatggc    |
| Oceanobacillus iheyensis        | NC_004193_51733  | ctcctgggtggtcggagaagattgcaatXgctgatgaattacctgtagaatacaagagg   |
| Oceanobacillus iheyensis        | NC_004193_60421  | gttgacgtggacgtctacctggctctgtatXcaactgatcatacctactgcaataggtc   |
| Ochrobactrum anthropi           | NC_009667_10258  | ctgacactgttgtgtgaaattgttgcctXactgcagcaggcagctgaaggcgtggactg   |
| Ochrobactrum anthropi           | NC_009667_16818  | gacaactcgtcccggcacgatgattgatgcXcatgatcgggacgcagtattatgtcattc  |
| Ochrobactrum anthropi           | NC_009667_24283  | gttgatgatgtggtttacgcaaagatgaaXgcaagacgcgccgaattacggccctcatg   |
| Ochrobactrum anthropi           | NC_009667_30906  | gatcagcccataggttgtatgtaacgacctXcatcggaaagagatttctctcgtcgtcac  |
| Ochrobactrum anthropi           | NC_009667_38785  | gacgattgacatagtgcaactttacagataXcttccatgcctgtccatgccctgtggttac |
| Ochrobactrum anthropi           | NC_009667_53092  | ggaacgtcattaggcgatagtgattgacgXgtttgatttctgcgcctgctaccgtcgtc   |
| Ochrobactrum anthropi           | NC_009667_54605  | ggatcgattgggaatagaaatgacggagaXgcgagagaaagcgggcttgcgctgaattc   |
| Ochrobactrum anthropi           | NC_009667_62239  | ggacgaatcgtatatgcaattccggctcatXggcctgcattacctgcccagaaacgcacc  |
| Ochrobactrum anthropi           | NC_009667_73886  | cgaattgagatagttcggcactactgttatXagcagcattgatgacgagctatagccg    |
| Ochrobactrum anthropi           | NC_009667_86867  | gtagccacgaagaatcttgcactggcaatcaXtcccttggctgtaagagcatagacgg    |
| Odoribacter splanchnicus        | NC_015160_122146 | ggaagtggcccgtagtgtctgtaagattXgcaactgagatagccgtaaccgaaatccc    |
| Odoribacter splanchnicus        | NC_015160_131065 | caggatgccggcgtgagaagctgattXttcagttggcattgaataccctggctatg      |
| Odoribacter splanchnicus        | NC_015160_138051 | ctggcttaactcggagccatcttattgaaXgtcgcaggaatagccgaataacgacatc    |
| Odoribacter splanchnicus        | NC_015160_15911  | ctaccagcctattctgacttactgggagXtgcctattacgattgctcaccgatcaagg    |
| Odoribacter splanchnicus        | NC_015160_24018  | ggacatccaaattcgtggagcagccagctctXtgaatgggactaaccgaaatctcgtcc   |
| Olsenella uli                   | NC_014363_14551  | cccctcgcgaggaatgctgaagaacatcXctcatcagctatagggatgagatctctc     |
| Olsenella uli                   | NC_014363_15175  | cgagaacatccctgccaggcctttgagctXtagttatacttactgtcatgagacttcc    |
| Olsenella uli                   | NC_014363_17307  | gatagctgcttaccagcgtcatttatcaXcgtgtccgttcagacaacgtctcgtgg      |
| Olsenella uli                   | NC_014363_40959  | gagacgtcgtacgagctggtgctgtggXtttgattgccaccaagataccattacgtc     |
| Olsenella uli                   | NC_014363_4196   | ctgctgtttggcacggtacacgggatttaXcatcgcataacgggcacggatattctgc    |
| Olsenella uli                   | NC_014363_45204  | gatatcctacctgttggagcggagccatcXatgtccttatcttacttaggcaggtcg     |
| Olsenella uli                   | NC_014363_52252  | catgacgcgaagacatcgtcacgagaactgXgtagctcgtcatgagcgtatggtttac    |
| Olsenella uli                   | NC_014363_53952  | gcataatcaatcagctcggcctccagtcXcgacagttgatgataacgggacgcttg      |

|                             |                  |                                                               |
|-----------------------------|------------------|---------------------------------------------------------------|
| Olsenella uli               | NC_014363_65590  | ggacgcaaatcctgcctttggcagacaattXgtaaaagtgtatgccagcgggtgcatatag |
| Opitutus terrae             | NC_010571_149752 | caacacagaactctgtaaacgctcgtgacXtcagcgcctttgcttatatagccgtgccc   |
| Opitutus terrae             | NC_010571_160114 | gattcgaagatagatttcttgattcgcctXagccgctccgctacctatctcccacccg    |
| Opitutus terrae             | NC_010571_172902 | ccactcaactttccacgtaaacggatgtXcgtcaaccaaacacacgatgacctgctc     |
| Opitutus terrae             | NC_010571_191179 | cgccgaagtaaacgccgagtttctactgcXcagcgcgatgacgcgtttcaatattcatgc  |
| Opitutus terrae             | NC_010571_236    | cgcggtaatcgcttgaacagatcgtttgcXcgcaaacgaaatcgagagattctcgcggc   |
| Opitutus terrae             | NC_010571_27487  | ggttgataaagtcattgcgcgtaagacgctXgagcgggaagagttcatctcagttatcgcg |
| Opitutus terrae             | NC_010571_42827  | gtccggctgtgagatccatctggaatgXtcaacaactcacacaactgacgatgcgcg     |
| Opitutus terrae             | NC_010571_44705  | ctgtctgttcatcagctgtattggacgaXgatcatcgatcggttagaattcacgcccgg   |
| Opitutus terrae             | NC_010571_81216  | ctgatgacgggtaacgcctctggaaagtXcatcgcgcaaaatgaagcgcgatgctc      |
| Opitutus terrae             | NC_010571_96344  | ccgatcagattcaactgggatgggaatXgtgaaacgtgacgcggcagtttgggtgg      |
| Orientia tsutsugamushi      | NC_009488_13282  | cgtcgaatgcaattggtgaaaggctXaatatgatcatgtagccgtgttctgtagcag     |
| Orientia tsutsugamushi      | NC_009488_30478  | cttctgtagtagaacttgtagtaccatXcatcgcgattttagatgacgataaagtccg    |
| Orientia tsutsugamushi      | NC_009488_37955  | ccttgactattggtgcatatggctgctaXcgaactactcactccagtgggtcacttag    |
| Orientia tsutsugamushi      | NC_009488_47571  | cagtgtttgctattatcttggcttggcXtcccatcgcatgtattgccacattgac       |
| Orientia tsutsugamushi      | NC_009488_48068  | ctgtagcaaacacggctacatgatcatattXgacctgttcaaccaattgattggcagcg   |
| Orientia tsutsugamushi      | NC_009488_64208  | ggaaatggctgagcggatattagcgcattgXtgggaaatggcgtgagttagcacgtctc   |
| Oscillibacter valericigenes | NC_016048_110685 | gttacagcggcacttcgcagccattcagcgXaaatggccgtaatgctcaacaatacttg   |
| Oscillibacter valericigenes | NC_016048_128654 | ccctgaacacctccgatgttctagtggactXcggcgaactaattaccactccgtttacgg  |
| Oscillibacter valericigenes | NC_016048_13112  | cgaagggcggagctcgcgatctgagccXgaaatcatgaattcatcgcgtatgctatcc    |
| Oscillibacter valericigenes | NC_016048_136996 | ccagacgaattccgttctattcacctgaaXtcagggccagacgaattctctgctctgtg   |
| Oscillibacter valericigenes | NC_016048_34261  | ggagatttccacgatgtagaatccgttcXggactttgaccgtttgacctggcttccg     |
| Oscillibacter valericigenes | NC_016048_51139  | cgccgagagcgtccatgtctctattcttXactcttgaacataacctaccgccagttg     |
| Oscillibacter valericigenes | NC_016048_57883  | cgcggtatgcctataagtctggtaccggcaXgaagattatcactcccgaatgaacagag   |
| Oscillibacter valericigenes | NC_016048_66723  | gacgacctgacaatgaaactccagcagatXagcaaggatacgaaggtgccacgctggtg   |
| Oscillibacter valericigenes | NC_016048_85392  | ccgtccaagtattgatcctgtagtctgtXggtgaaaggcaggtacagcgaagataggg    |
| Oscillibacter valericigenes | NC_016048_92248  | cacatctgagcctcctggttagtgagggaXtccatggtatagaggttataggcttctac   |
| Oscillibacter valericigenes | NC_016048_99616  | gtatccacactccgacagtgatccatgtgXgttacggcaggagttgtagatggtctttg   |
| Paenibacillus sp.           | NC_012914_121036 | ccgtcagcgcgataatgacggagcgaatXgacgagaagtgtgcccccaatattacgatc   |
| Paenibacillus sp.           | NC_012914_145156 | cctgatgactcgtctgacttggcccaaXtctccagcccggtgctcaagataattag      |
| Paenibacillus sp.           | NC_012914_156560 | cttctctacaggtatcccttactcttXaggagccgttgccataagcgaactgctc       |
| Paenibacillus sp.           | NC_012914_210288 | ctttcagaagaggattatccggctgaaccXtaaccgttccgcttctgacgcctgtaag    |
| Paenibacillus sp.           | NC_012914_239437 | gactgaacaaatgctgtagctccgcaatgXgtttgcttctgcttctgcatcatctc      |
| Paenibacillus sp.           | NC_012914_27271  | gtgtacgtgtaagtaccgtcttggaaagtcXctgtctgccaatgaagccctcatcagcc   |
| Paenibacillus sp.           | NC_012914_52794  | ccgatgattgataataacgaagtcgatgXgctcccgctacgctggagtgaaagcggctgg  |
| Paenibacillus sp.           | NC_012914_99091  | gagcgtaaagagcgaatggttgaagcXgttacggaatgtacgagagtaactgtttg      |
| Paenibacillus terrae        | NC_016641_119272 | gtttcgcaaatgtgaactgggacaaatXtgtagacgatgaacctgggttcttgagg      |
| Paenibacillus terrae        | NC_016641_128240 | ggattgtgagcctcaagctccataacgateXcgacattggtgagtgcaagctgtggacc   |
| Paenibacillus terrae        | NC_016641_165524 | caacgtgttgaggataacgcttattagccXttgtccgacagcgataattcggtatcgc    |
| Paenibacillus terrae        | NC_016641_202745 | caactcttaactgctcgaactaacgtXccgctcctccaactcgggatgctgttcag      |



|                             |                  |                                                              |
|-----------------------------|------------------|--------------------------------------------------------------|
| Paenibacillus terrae        | NC_016641_20809  | ctgatcataggtatcgagcaagcggatXaatccctcaacaccacaatcgtttcatc     |
| Paenibacillus terrae        | NC_016641_31105  | cggaactgtatccgtaacctccaaccctXaggtgtactgggtgtctgtattgccagg    |
| Paenibacillus terrae        | NC_016641_52867  | caatcaccttactgtaccttgaagggtcXtccagctcaccagcctggtgtacgcagcc   |
| Paenibacillus terrae        | NC_016641_71660  | cgctggcttggccgaattcgcgatgggtgXtgtttgcttcgcaactgtctgaatggttc  |
| Paenibacillus terrae        | NC_016641_84086  | gggatgccgtgatagccgatagctcacgaaXccgttctgaatagtgtggtgtaac      |
| Paludibacter propionigenes  | NC_014734_117315 | gtcgcgtccctgaatgtcatacgggctcgaXgtactgatagtagagaaatctactttgcg |
| Paludibacter propionigenes  | NC_014734_19351  | gtaaacgtacaaccgcgatgtgtctacgXacgtaacctgatagcactttgtctgtc     |
| Paludibacter propionigenes  | NC_014734_31685  | cctttgtcttgggtgtgtcccttaagaXcccagcgattcaagcatcaggaaatgtatcg  |
| Paludibacter propionigenes  | NC_014734_36929  | cagattgccaggttaacaccgatcaggaXtaccagcacttaagttgacttgactgcc    |
| Paludibacter propionigenes  | NC_014734_44142  | cactgttgatactcggctgagtgctggXcatcggatttagaatagtagcagtagttc    |
| Paludibacter propionigenes  | NC_014734_53013  | gtttggtgtcggcatggcttctgtatctgXccaactctgactttgtaaacagcatggc   |
| Paludibacter propionigenes  | NC_014734_65383  | cacactcggggtgcacgatacagcaccXaatacttacaacatctttgccactggc      |
| Paludibacter propionigenes  | NC_014734_72790  | gtgttcttctcgtaccgataccgcttXctgcacataaacgccacgtgtctctac       |
| Paludibacter propionigenes  | NC_014734_79622  | gatagcgttattgggtgtagtgtgagcaacctXggtatatagtcagcggagtttggaac  |
| Pantoea ananatis            | NC_016816_114522 | cgcgacggaataaggtcaggaatgctgaXgtaagattgtcggaaatccgttatcagcc   |
| Pantoea ananatis            | NC_016816_142865 | gctgtgttactgtctgttcgctgtctcXcggatgttagttattcatcgcgatggcacc   |
| Pantoea ananatis            | NC_016816_153086 | cgttgcataattatctcagcccaagtcaXctttggcgttgactggcaccgggttacgc   |
| Pantoea ananatis            | NC_016816_17363  | ggccaactcccgcgaacagttggagagaaXacgtcaaggtgttcgattccaggtgatacc |
| Pantoea ananatis            | NC_016816_22376  | cggttcaggttacaccgtgcagcggctcatXatcccttatacttaataacaccgcagg   |
| Pantoea ananatis            | NC_016816_39495  | gtccattattacgccgacttggcaagctXaccgggcaaccattgtggatgcgctacc    |
| Pantoea ananatis            | NC_016816_50440  | ggtacattagcgataagcattgatagcctXactgaaaccgtgatattaccgtggcgacc  |
| Pantoea ananatis            | NC_016816_53093  | ccgttcaaggcgataacttcaagcattXagcagatgtatcaccgcagctgattgtgc    |
| Pantoea ananatis            | NC_016816_81917  | ctcaggttcggccagatagtgatcagcXgaaacagatcggctgttcaattgtaag      |
| Pantoea ananatis            | NC_016816_87809  | ggcttccacatggagcatagaagctcaatXgttaccacgccttctgctgatcagacc    |
| Parabacteroides distasonis  | NC_009615_101092 | ggtagctcctcaaacatttcttcttcXgccatagatcgaaggtggacataagtcc      |
| Parabacteroides distasonis  | NC_009615_112404 | gtagagacgggtgatgtaaatggcttaacXgagcagccttggcataatcatcgc       |
| Parabacteroides distasonis  | NC_009615_11903  | cactcccgttaccgatcgtgatcaggaXatactgaagatcaggtgatcaacagg       |
| Parabacteroides distasonis  | NC_009615_13528  | cgatgcaaaggctggcggatggcccaccXattataatagataggtgattgtaagcc     |
| Parabacteroides distasonis  | NC_009615_143197 | cgggtcaggtatggcaattccgaaatgacXcatcggcactgtgatagcgttggattgg   |
| Parabacteroides distasonis  | NC_009615_2172   | gtgtgttcgtggaatacgtatataatctgXtctgcttaaccgtatggaacgattccgg   |
| Parabacteroides distasonis  | NC_009615_3412   | ctgccttactctatggcgtcatctaatgXtagcagatgaaccctccctcgaatacgc    |
| Parabacteroides distasonis  | NC_009615_34847  | gatagttcttggcgtacctagtctccgtXtgaacctgacaagcgcattatggctacc    |
| Parabacteroides distasonis  | NC_009615_5706   | gatagcagtagcggagattactccgttctXtgggttctccgggacaacgttgggtggag  |
| Parabacteroides distasonis  | NC_009615_7457   | gagagggacgttatgaccagataggcctgXgatctcaaatcgtgattggcgtgaaagc   |
| Parabacteroides distasonis  | NC_009615_8808   | cttattccaagttcgtcacctgctgttacXgatctactctgacgctacggcgttgatg   |
| Parachlamydia acanthamoebae | NC_015702_102297 | cgccaatattcatcggcatttgtgcgggXtagataggtgtcttttagctcaacttg     |
| Parachlamydia acanthamoebae | NC_015702_31812  | ggctctcacagataaggtatcctgggtXgagcaagtagttgcaaacacctgagaagc    |
| Parachlamydia acanthamoebae | NC_015702_36577  | catgtaaacatcagtgccaggaatcagaXggaggtgcatcagagaattggagagttcc   |
| Parachlamydia acanthamoebae | NC_015702_43288  | ctgcgacctgtgtaagcacctatccctaXcgtgcaccaatattacaactgcaacttc    |
| Parachlamydia acanthamoebae | NC_015702_64091  | ctgtggccacacagctcgaacacatcttXgtttatctcgggtcaccagtaggatgcac   |

|                              |                  |                                                              |
|------------------------------|------------------|--------------------------------------------------------------|
| Parachlamydia acanthamoebae  | NC_015702_6683   | ccgttcaagaagctgttgcctcattctXgctcacgtagcacatc gatgtacaaagtcg  |
| Parachlamydia acanthamoebae  | NC_015702_87178  | caaagccttgaggacaagcatgggaataXtgaacgtgtgtttgcctgcgcctcc       |
| Parachlamydia acanthamoebae  | NC_015702_89     | gtgggacaaatgtgcgaatctgaagctgXtctatccttgggaacctgttaattgggc    |
| Parachlamydia acanthamoebae  | NC_015702_92349  | gcaagcttcagatgtgatcgtcgaagcagXaaacagcaaatctcgtgaaattgagccag  |
| Paracoccus denitrificans     | NC_008686_30173  | ctttgccaatacgaacaagggtcatatggcXggttcgggtccgaaggacaaggtcgacac |
| Paracoccus denitrificans     | NC_008686_3442   | gggtgacagcctttggccgaccaggattcXaaacttacaacatagccctgaacctc     |
| Paracoccus denitrificans     | NC_008686_44401  | cagaatctgtaagttgtcacatggcccgXcggcgagctagattgtcatcgtgcatccg   |
| Paracoccus denitrificans     | NC_008686_47344  | gatgaagatcgaacgattgggacggaacgXatgggaatgctggtcgtgcatatggcgc   |
| Paracoccus denitrificans     | NC_008686_58883  | gcattaattgactgatcctgtcaggataagXgtcttccatgccgccgatccgcatcctc  |
| Paracoccus denitrificans     | NC_008686_71793  | ctggttccttgcctgatgcactcagaccXcagatcagcgtgctgttcataactcc      |
| Paracoccus denitrificans     | NC_008686_90528  | gcaatatctgttcaggcagccgaaccgaXgttcagcgtctgaacacagatcgggtgg    |
| Paracoccus denitrificans     | NC_008686_93     | ggatttgcgtgcttgcggttaacctctcXgaccacgcgggatatctgaattgcatac    |
| Paracoccus denitrificans     | NC_008686_94365  | ctttatgatctcgagaagacgaaatagcXcatgatgggccggcgaactaagattcc     |
| Paracoccus denitrificans     | NC_008686_9527   | ctagcatgatcgggtcatggatcaaccatgXcaggccttgttggcaatgccgcgaaac   |
| Parvibaculum lavamentivorans | NC_009719_114962 | cttaagcctagcattcattctgaatgaatXtctactgttctctgcccccagcagatg    |
| Parvibaculum lavamentivorans | NC_009719_118495 | gtgggacgggatagcaatgtgaaagcccaXggttcagtaaatgcagatagggctccacg  |
| Parvibaculum lavamentivorans | NC_009719_130347 | gcactttcccagatgttgtgatcgggatcgXtcgatcatccaggactcagaacagctcc  |
| Parvibaculum lavamentivorans | NC_009719_47545  | ctggatgtgccgaataaggcgggtcagaatXcttgataccatttctgtccgttctg     |
| Parvibaculum lavamentivorans | NC_009719_528    | cgcggtgagatattcctctcgaatatccXgagaatgggacagatactgatggctccg    |
| Parvibaculum lavamentivorans | NC_009719_64365  | gacgggtgttagtcgggttccaaccgXatgaattaacaggcgttgcaaacaggac      |
| Parvibaculum lavamentivorans | NC_009719_8170   | gtgtcagtgaaagtgatcgtctcgtaatcXgaaatggcggcgtggttcagataagcc    |
| Parvibaculum lavamentivorans | NC_009719_83162  | cgaaggtatcgaagctcttattacaagcXctctcagccatcgaattgcgctcatg      |
| Parvularcula bermudensis     | NC_014414_22934  | gcattcgtacattaccctcgccattcaaXgtcccgtcttgatgaatattcagagaagg   |
| Parvularcula bermudensis     | NC_014414_35610  | gpcattcctgaaactggaagacggcatgtXaatctgccgccgatagaattgaagcgaag  |
| Parvularcula bermudensis     | NC_014414_37649  | cattggatgctgtatttgcgtcagtggaaxgagaactgatgacgctcctaagtcatcggg |
| Parvularcula bermudensis     | NC_014414_48168  | ctcctgatagcgcacatttatcgggtcggXaaggccctcgtcattgtcgaatcaccatc  |
| Parvularcula bermudensis     | NC_014414_52216  | cctctctttatcgagctcttgcagctcgXgagggtagaactatgacgcgatcaagttc   |
| Parvularcula bermudensis     | NC_014414_82203  | gaactcaccagaggccatttcttgatgctXgctgacctatcctcaagatacatggtggc  |
| Pasteurella multocida        | NC_017027_12520  | ccgagcaatgctgccgaagaagtcagcgtXccaaagaccagatagctccagtagcatg   |
| Pasteurella multocida        | NC_017027_15182  | cgcgaaactggaagtacttgggcaagccXcgaacgttagatagctcgtagtgtagcc    |
| Pasteurella multocida        | NC_017027_18071  | ctgacaatccgttgacttatcatcagXtagatcctcaatcttctagcagctggg       |
| Pasteurella multocida        | NC_017027_21678  | gccacagaaggtgatgacttgggtcgtaaXtccgtgtaacttcaaacgcataaac      |
| Pasteurella multocida        | NC_017027_27129  | gtaaagatcaattaactcggattcatcggXtgcaagataaccgccccttgcacgc      |
| Pasteurella multocida        | NC_017027_38091  | gatttaccgttgaccaatcgcctttggXaagcgggtactgaaagagattgttgggatg   |
| Pasteurella multocida        | NC_017027_412    | catcctaggagtttacaacgcgatactcXgtggattgttgcctctgccaatgatgcg    |
| Pasteurella multocida        | NC_017027_42257  | ccgtgcatcagctttccaatgaaatcccXttgtctgatcattatcgagacatgttagc   |
| Pasteurella multocida        | NC_017027_44678  | ctctccattcagggcctaagcttcttgXtgcctgtctagaatttccgcttgacgtgc    |
| Pasteurella multocida        | NC_017027_54849  | cgccgatcccgtacatcgggttacagttXtgcctgaaccatattccctcacaatc      |
| Pasteurella multocida        | NC_017027_5664   | caagatcctgattccgtcgttggctggtXttaccacaatggcgatgctgagcactgg    |
| Pasteurella multocida        | NC_017027_64185  | cgacaagagcgtggtcacgttctgctgtgXgttatccacatggtggcgcaagataagg   |

|                                    |                  |                                                                |
|------------------------------------|------------------|----------------------------------------------------------------|
| <i>Pasteurella multocida</i>       | NC_017027_65830  | gggtttgaccactcagtgaaactggcttgXccataaatgcgtagatgtttgacgaacc     |
| <i>Pasteurella multocida</i>       | NC_017027_75251  | gtacgattggtaaagatggcgttacttgaXcaggtttacgctgccaggtactgctgtag    |
| <i>Pectobacterium atrosepticum</i> | NC_004547_106632 | cccttctctgctcgggtgataattgctgcttcXgtcgggtccacagagatggcaaacatag  |
| <i>Pectobacterium atrosepticum</i> | NC_004547_109584 | cacaagatctgctgctcactgtcagatagctXatcaggttccagctctgtgttactgctg   |
| <i>Pectobacterium atrosepticum</i> | NC_004547_2356   | cccgttaacgttgtactaaatgctgttcccXtcaataagccctgtgctgttacctgagaagg |
| <i>Pectobacterium atrosepticum</i> | NC_004547_55905  | gacaacgtgaaggaaacctctcatatgatXtgcggttctccattgcttatatccactc     |
| <i>Pectobacterium atrosepticum</i> | NC_004547_57429  | gtggctgctcggcttccagccaacagcgtcXtgcagctccacagaaattaaatggatag    |
| <i>Pectobacterium atrosepticum</i> | NC_004547_63136  | ctttggatggttcagcggcattcctcttaXccgcttctgttggaaacgctatcaggcg     |
| <i>Pectobacterium atrosepticum</i> | NC_004547_94034  | cagatagtgcttaacacgtgatagaggctXtatcttctcatagcctgcttccagacgc     |
| <i>Pectobacterium carotovorum</i>  | NC_012917_123242 | cagaagacaagcaacagcgaatctcacttcXagcgctcatgctgttctgtgggtgaaccg   |
| <i>Pectobacterium carotovorum</i>  | NC_012917_130929 | cgtcttgaatccctgctcctgctgaatXgagatagttcaatcagcgtgacagagc        |
| <i>Pectobacterium carotovorum</i>  | NC_012917_148127 | gattgatagatategggacgctaatgccXtgcagggaactcaagcctgatcatcttc      |
| <i>Pectobacterium carotovorum</i>  | NC_012917_160844 | cgggcaaacggacagcggctatgaatctXgcaaatctttaacgagccattctgtg        |
| <i>Pectobacterium carotovorum</i>  | NC_012917_45160  | ctgatatcgttagcaaacgtgtatgaccXgcgccgttgacaatcaggccgtaatcaccg    |
| <i>Pectobacterium carotovorum</i>  | NC_012917_55481  | gtacgattgcttctcctgatactggcctgaXtcaccatcgtcaatctttacgatagcggg   |
| <i>Pectobacterium carotovorum</i>  | NC_012917_57280  | gatcaatagcataaagagattgatgaactXcgggagctgattcctcgggagcagtaag     |
| <i>Pectobacterium carotovorum</i>  | NC_012917_94896  | gagacactctctgcatcaccagcggcagXgtaatgatggtatccaccaccgtctgtatc    |
| <i>Pediococcus claussenii</i>      | NC_016605_14683  | gaaltgacctgaacggatgggtgtgattXcggagccttattagactaccagggtggcg     |
| <i>Pediococcus claussenii</i>      | NC_016605_2152   | gtgcttatttgggattcgtgtagtatcgXagaccggcgttaaacgatggcaatttcac     |
| <i>Pediococcus claussenii</i>      | NC_016605_2157   | ctgggtgaacttaggctcattgctggtaXcattatttgggtggcagttaccgggcaac     |
| <i>Pediococcus claussenii</i>      | NC_016605_22057  | ggcagatttcttagtaatgtacaggcctXctgttctaggtggtatcgaagtgccccag     |
| <i>Pediococcus claussenii</i>      | NC_016605_28236  | gtgcgcatagcgtcatctgagaacggttgXctagcagcagtttcaaaagtctgtatgctg   |
| <i>Pediococcus claussenii</i>      | NC_016605_31119  | cagtttacgttctatgcccctcgggtgaXgttagtcattcaggttatctgaaacgtag     |
| <i>Pediococcus claussenii</i>      | NC_016605_51083  | cgctactcgaagcctggttagtaccagXtccaacaataataactaaatctgctgcctg     |
| <i>Pediococcus claussenii</i>      | NC_016605_60554  | caacaagtgcacacacaataataaccgatXtaactgtgaatggcgtccaacggaggtcc    |
| <i>Pediococcus claussenii</i>      | NC_016605_60944  | cgtacagcactgtaactgaataactaatgXcctgtgttcgctaactccgcataacaacg    |
| <i>Pediococcus claussenii</i>      | NC_016605_6889   | gttggcatcgggttgagcaactaatggctXaattgttgacgggtagctggtatcggc      |
| <i>Pediococcus claussenii</i>      | NC_016605_9731   | gctaccaatttgggtaaatggatgctgacXtcaacagcgtctggaaggagcctccgctc    |
| <i>Pedobacter heparinus</i>        | NC_013061_106553 | gtttgatgaactcgttcttccggatggcXtcccttctccggatcagactcaggc         |
| <i>Pedobacter heparinus</i>        | NC_013061_114142 | gcctttacagcagcttgtatttcccgggtXtccaggacaggggtatcggcagcagttatg   |
| <i>Pedobacter heparinus</i>        | NC_013061_126452 | gttaatactcagatctcagctcagctgtXcgaactaatagcccttccagcaggtcacc     |
| <i>Pedobacter heparinus</i>        | NC_013061_151    | ctggctactgtttgctctgatctattataccXatagcgtgctgctcctgctgctttatac   |
| <i>Pedobacter heparinus</i>        | NC_013061_153957 | ggcaatcgaatgtgtcaggtcacccttatXcatatcgttccgtatcagtagccgaag      |
| <i>Pedobacter heparinus</i>        | NC_013061_161521 | gtataaattaccgggtgcacattgtgtacXcctcaccactaccacttaccgcac         |
| <i>Pedobacter heparinus</i>        | NC_013061_16699  | gttaagtgttccagaagcggctatcgttXtccgaaattccggacggtaacacggctc      |
| <i>Pedobacter heparinus</i>        | NC_013061_32709  | gcaagaccagagtttagagagttggcttctXaacttaaggccctctattaccctg        |
| <i>Pedobacter heparinus</i>        | NC_013061_67106  | ggttagcagctgtttctcaaggagaggaXcagatttcgtatctgtttgacaaatgcc      |
| <i>Pedobacter heparinus</i>        | NC_013061_86822  | ctgcccagggaacaagaatctggtgtcXaagtgcgcagcattccgttctgccaatag      |
| <i>Pelobacter carbinolicus</i>     | NC_007498_114257 | cttatctatttgcgtgagtaactcactgtXgccaattcctgtcagctagaggcgtgg      |
| <i>Pelobacter carbinolicus</i>     | NC_007498_22528  | gtctggacgaggaagaattgctgtcagctXtccatcgtcgcagctacaatctcaatggc    |

|                                 |                  |                                                               |
|---------------------------------|------------------|---------------------------------------------------------------|
| Pelobacter carbinolicus         | NC_007498_29158  | ccgctataatgtgaacacgggacgtatgacXaatatgggtggtgccctgttaccataccag |
| Pelobacter carbinolicus         | NC_007498_42030  | gcaagtgaacgagacattcgaagtatacXtgagcatggtttccatgaatcccgcactg    |
| Pelobacter carbinolicus         | NC_007498_46787  | ccagtttaagcgtttgtgcaatatgggctXcagccagcgtttgccatttccgctgtgg    |
| Pelobacter carbinolicus         | NC_007498_58057  | ccggctacattatggacaatggttgaaatcXtttctgacaaagctgatttccggatcgcg  |
| Pelobacter carbinolicus         | NC_007498_62365  | cgagttgaatcaatttcaggccgaactgaaXcgtggatacttccggctcgatcggcgagag |
| Pelobacter carbinolicus         | NC_007498_66719  | ccataagttaacgggttcccttccactXtcatatcaacaccgaaatggccctgcactgc   |
| Pelobacter carbinolicus         | NC_007498_8247   | ggcgttaacttcaccgggtgatggtcatgaXggctcagttcctcgacgctcaacttgagag |
| Pelobacter carbinolicus         | NC_007498_85145  | cgtagagtttgcgagcgtatgctgtagaXtataaccgttgagagttgattcgggtgacac  |
| Pelotomaculum thermopropionicum | NC_009454_36     | gttgtgctgggtactacaacatccgtgctXaggcagattacgggtggaactcattcaggag |
| Pelotomaculum thermopropionicum | NC_009454_45695  | cctgacgcctttatcgagaatattcttagtXgattgtgacgagcgtccggcagagcctc   |
| Pelotomaculum thermopropionicum | NC_009454_49041  | cactggtagtttaacaatccaggggcctcgXaagtcaactgctccttaccaaacgctgc   |
| Pelotomaculum thermopropionicum | NC_009454_68499  | gtatttctgtaactgggagagcggatgatXttccctgatcgtcactatgggctcttcag   |
| Pelotomaculum thermopropionicum | NC_009454_6874   | cgctgttagagatggtgctggcgacgctXgaaatcctgagcaggtattacagcatttc    |
| Pelotomaculum thermopropionicum | NC_009454_77111  | ctggctaaccctcgttgcataccctcgtcXcatcatggtggcaagtcttctacggagc    |
| Phaeobacter gallaeciensis       | NC_023137_110686 | gggactatgttaaggctcagctttagatgacXggctgcaagcctgttcgatcgatttcaac |
| Phaeobacter gallaeciensis       | NC_023137_121145 | gacttctacgccgcttgggttctatXttcgcgactactggtggagtaacttatgc       |
| Phaeobacter gallaeciensis       | NC_023137_125043 | ctctctcatcgatgttgcggtgctgtatcaXtacctcgtgagtggtgttggaaattgg    |
| Phaeobacter gallaeciensis       | NC_023137_23554  | gcttaggtcgttccattccgatacatcgcXagacaggttctcttctgcctcaatgcg     |
| Phaeobacter gallaeciensis       | NC_023137_26854  | ctgagaatttggccatcgtcttgcgcaXattggcggctgttctggaattgactaatc     |
| Phaeobacter gallaeciensis       | NC_023137_295    | ctctcaacatggccttcacgcagcaaatcXttctgtatattgaggaattgccgggtggc   |
| Phaeobacter gallaeciensis       | NC_023137_35807  | ggcaattgtctacggttcataggtgtaaXggttggcctcacaactccaccgggtg       |
| Phaeobacter gallaeciensis       | NC_023137_57146  | ccaattggtgaattgacgcaattccagXcagccagcgttccgacatgagccggatg      |
| Phaeobacter gallaeciensis       | NC_023137_88317  | gcagcgttctctctgtagatggcctgacXaaagcagttgcagatccgggtcagtcag     |
| Phenylobacterium zucineum       | NC_011144_128200 | cgctatttggattactggagacgtagacXctctcacgcaatgaaagcgtaggcgcg      |
| Phenylobacterium zucineum       | NC_011144_141    | ctatcgcaaacgcgggagaacaatcctatXgtcgggttccgacatgctgcttgaatc     |
| Phenylobacterium zucineum       | NC_011144_42482  | cgcctgtgtgggaaatgccggttctgatcXagatgacatcatcaagcaagcaaaag      |
| Phenylobacterium zucineum       | NC_011144_5719   | ctacaggcgtgcttccgaacttgcgtgaXttgaatctcgtgagagatccgcaacgac     |
| Phenylobacterium zucineum       | NC_011144_61638  | gaaggagccaccagatggagattacaacXacttgggaagttgtcgaacaaccagagc     |
| Phenylobacterium zucineum       | NC_011144_95197  | cggcgttacacagattggtgaatttagccaXctcagattcgttcagatgtaaccgggtgac |
| Pirellula staleyii              | NC_013720_105100 | ccacttccgctattcctagcgaacgttaccXcccattggaagccatgaatcttcgagc    |
| Pirellula staleyii              | NC_013720_12496  | caagcgaatttgttccgatatctgtgaXaaagattggcagatagatgattccacgacc    |
| Pirellula staleyii              | NC_013720_135232 | ggtaagtttggcaatctcggatgctgatcXatcacttactcagggcaatactactgctc   |
| Pirellula staleyii              | NC_013720_153269 | caatttgccttgcgccacttggcatcactXcaaatgagcatacagattcctcgttgc     |
| Pirellula staleyii              | NC_013720_161421 | gagtacgggatttaggagttcttctcgtaXaccagcaccaaacatgctgaccgagcgtg   |
| Pirellula staleyii              | NC_013720_171205 | gcgataccgagctgctgcaatagacgatttXgaagacgtccgaagtcttggcactcaag   |
| Pirellula staleyii              | NC_013720_19762  | cgtgcgacgaaacattggcctgagttcggXcttgcgacacagtgfgaaattcacaccac   |
| Pirellula staleyii              | NC_013720_34259  | gcttggctgatattctctacgtcggcaggcXgcaatcgcgtagtgatttggcaaggctc   |
| Pirellula staleyii              | NC_013720_55128  | catgatctcaccagtggttaaccgtccaXttctcactctcacagtcgaagcagctctgc   |
| Pirellula staleyii              | NC_013720_68150  | cgaccactcaccagcgtgagattcacatcXttagataggtccatcacaaccagatcggc   |

|                               |                  |                                                               |
|-------------------------------|------------------|---------------------------------------------------------------|
| Planctomyces limnophilus      | NC_014148_102055 | gtattcgaatgccacactgccattcgtgXtgattgaaattccgagcggaagaagccg     |
| Planctomyces limnophilus      | NC_014148_112895 | ggtagctcccagctggagatctctgccgtaXattcttccaataactgacaggtgtcgc    |
| Planctomyces limnophilus      | NC_014148_122770 | gaagatgttccctccacgcaacaatgtgggXgaaatctatagggagctgtattgtggcc   |
| Planctomyces limnophilus      | NC_014148_141906 | ggtagcttgcgaaatgacttgtgtccggXcatttcattgtctgataatcaccagaagc    |
| Planctomyces limnophilus      | NC_014148_162547 | ggtagcggcccagaaatcaatcactctgXggccttcgattgacatagagcgaaagatc    |
| Planctomyces limnophilus      | NC_014148_180725 | ccagtgattcagcgtggattgttcagtacaXtcaaacaccttgaagggtcgaatggcag   |
| Planctomyces limnophilus      | NC_014148_36882  | ggtagcagtagcctggccttgatagaactXcccgggtgattcaatcgggaattgagatc   |
| Planctomyces limnophilus      | NC_014148_7      | gattgctcaacattgttcgaagtcaagatXgattcaggcgggtggagatcagcttctc    |
| Planctomyces limnophilus      | NC_014148_9885   | ggtaggaagcctggagcctggcgatttcaggXgatgatacttctgagaagattcatccc   |
| Polaromonas sp.               | NC_007948_109454 | catgttgtacgacaactgacaattaagtgcXcactctgttgcgtaggcgtcgcagggagc  |
| Polaromonas sp.               | NC_007948_12535  | ccaaacattgatgcgctctcatttgcgtgXatgatgcaattcagttcatgagaagggc    |
| Polaromonas sp.               | NC_007948_140486 | cacagcgttacttccactgacaggtatXagaccgattgatgcaagtcgccttaacgc     |
| Polaromonas sp.               | NC_007948_152952 | gtgcacaccggatagttccgccacgagttXaataatgtcggttgggtgtccaccgcc     |
| Polaromonas sp.               | NC_007948_173029 | gcaacgaattgcgtccctgggaacgcaatXccttcttcgcaaatatgtctctgattg     |
| Polaromonas sp.               | NC_007948_52682  | cggtgactgatccgttccctgagatttggXtatctgtgacgagaaggtgtaggtgaacg   |
| Polaromonas sp.               | NC_007948_66223  | gctcaagtatccagtgccgacttgcacggXgtttgcaatgtcgtgtcctgtaaaagtcg   |
| Polynucleobacter necessarius  | NC_009379_20095  | catctcgggcttgcctagaatctctccatXgcattttaggattcgtccgcacagtg      |
| Polynucleobacter necessarius  | NC_009379_28739  | cgtaacaagatgccgtattccagcaaatatXttactgagcgcgaatagtcagcaggtacg  |
| Polynucleobacter necessarius  | NC_009379_360    | cattgccatccattgcccgttggtaatgcXtaccattctgatcgcgtcactggcattgg   |
| Polynucleobacter necessarius  | NC_009379_37047  | gcaataaccgtattgaccaccaacgatgggXccactcgttactaccacacttggatg     |
| Polynucleobacter necessarius  | NC_009379_39521  | gcaacaggataatcagcggaaatattcaacXaatgattctcctcgggctcagtcaccctc  |
| Polynucleobacter necessarius  | NC_009379_42592  | cgtagcagaatgtcactagcgttggctttaXttagcgcacacttagtcactcactcaacg  |
| Polynucleobacter necessarius  | NC_009379_48985  | gccacgtgacaaactaccgataagacgtgaXgcgatccatggttggtagctcggcttaag  |
| Polynucleobacter necessarius  | NC_009379_63019  | cgaacaccttctgacgcaagccttctgctgXgggttaactacaacgtattgactggatg   |
| Polynucleobacter necessarius  | NC_009379_9352   | gacgtcgtggtatgggtgcttatacgaagXgtgatattcagctcagattcaaaccttgc   |
| Porphyromonas asaccharolytica | NC_015501_11833  | gggagagggcgtatccgacgatagagagttgXaagtgcctattgtggtgaaactaccctc  |
| Porphyromonas asaccharolytica | NC_015501_29589  | ccgctatctcgtcttgcagcgaagtgggXcaaaaggtgtaacacatcaaggatattc     |
| Porphyromonas asaccharolytica | NC_015501_34324  | gcttatctcaatgctactccagccacggagXaccactaaaggctcctaattaaagctgtg  |
| Porphyromonas asaccharolytica | NC_015501_35112  | gttgaagtcttgcgtgtagagtgccggagcXaaacttagatgcacctcaccctcgtatag  |
| Porphyromonas asaccharolytica | NC_015501_45519  | cttgagacgtatctcctgtcctcagcgtcXattccgctcctaaagtcaattgagtagctc  |
| Porphyromonas asaccharolytica | NC_015501_52464  | cagagcttggatgacgccatagctgtgtXatgctgtgatagatgtccgttgagccttgc   |
| Porphyromonas asaccharolytica | NC_015501_60577  | gcattgtctctatgctgctactgcttctXgtcaagatagcatctcctcgtctcggcac    |
| Porphyromonas asaccharolytica | NC_015501_66274  | ctatgatagcgtatgagccgaccccaXgagagaaaggatagctactactgattg        |
| Porphyromonas asaccharolytica | NC_015501_69848  | gcggttagtctctgtatgtctatcgaagtgaXtatgtccatgctgagagtagactctgtg  |
| Porphyromonas asaccharolytica | NC_015501_7967   | gcatcacttacctatatacccacaagtgaXtgatgatgaagacgcctgccagctctatcg  |
| Prevotella ruminicola         | NC_014033_108855 | cagggcagcagctgtcctgttcaacagtgXatgttctgtagctacgatattggtacagctg |
| Prevotella ruminicola         | NC_014033_120553 | cttataccgacagcctggctggttataccaXaaggtatacaagagtttctgtcgcgtg    |
| Prevotella ruminicola         | NC_014033_13     | caatggcttctaataagccaccgttgagagXttacacgagcaccgactttatcaggacctc |
| Prevotella ruminicola         | NC_014033_43886  | ccattgagcgtcggcgttcgttataatXatccacgatgtatcgttggcaggtcacaac    |
| Prevotella ruminicola         | NC_014033_64255  | ctcaccactcgtttatgatcgaataggtXggtaatctcccaaggagccactttacgttc   |

|                             |                        |                                                               |
|-----------------------------|------------------------|---------------------------------------------------------------|
| Prevotella ruminicola       | NC_014033_7344         | caggatcaacttctactgtccgcctaXactccttgataagcacggtgatatcgcgcc     |
| Prevotella ruminicola       | NC_014033_77069        | cgctatgccgagaagttccctgtacagagXgttcatcaagaaagctatcgaagcttatcg  |
| Prevotella ruminicola       | NC_014033_98573        | catcaaatccgaatacacccgttattctgtaXaggtggtgagccaccaagcgaccgcag   |
| Prochlorococcus marinus     | NC_005042_11749        | caggatgttcaagagcagcaacgctccagXtctctcataaattgaggcatcattatcg    |
| Prochlorococcus marinus     | NC_005042_1358         | gatttaccactttgccacccttggtggtXgaatctggtactgtagaagttgctggtgg    |
| Prochlorococcus marinus     | NC_005042_20370        | cctaagcccagcctttggtaggagttgtaXagttcatattctcgaactatgctcccacgg  |
| Prochlorococcus marinus     | NC_005042_23622        | ctttcttgctcctggctggtattgctggXggttcagggttcttcagcagaagctatc     |
| Prochlorococcus marinus     | NC_005042_47233        | ctgagacagatcggtgataagtaaccaatagXcctgattcaataactgccttcggcc     |
| Prochlorococcus marinus     | NC_005042_6808         | gcaatgccttgagattaccgctggtgtaaaXcagccttattgctgatagagaatccctccc |
| Prochlorococcus marinus     | NC_005042_9549         | gcgctcaagctgcgagcttctggcagataXgtgcaggctgtagactatctgattatcag   |
| Proteus mirabilis           | NC_010554_26664        | ctgtcagagctgtatgccacacagccttXctagaataattatcccgtcaacgagatgag   |
| Proteus mirabilis           | NC_010554_34956        | ggttaattagtgaagaaggacataggtaaXtccggccgattgcatggtgctgctcg      |
| Proteus mirabilis           | NC_010554_60020        | ggttatgagccggataacacaacaagaaatXccgctacggtgttactcttttactgctg   |
| Proteus mirabilis           | NC_010554_66427        | cgctgttgataacggcagtaacaggacgXaattcccgaagatgtgctgctggccatac    |
| Proteus mirabilis           | NC_010554_75215        | gtgaatatgttggccattgtgcccctctXcgcgaatggttagttagtattataaccg     |
| Proteus mirabilis           | NC_010554_80697        | cgaagaaatcattagatcatctccatcaacXcacacctactatgccccaagtcgctgtcc  |
| Proteus mirabilis           | NC_010554_84878        | cacttcttggtagtatgctgctgatcctcXtgattattcattgacacagtcacagtggg   |
| Proteus mirabilis           | NC_010554_90274        | gacttgcggaaccaaatgccaagagacatcXatataaacgccgtcttgaaccgagttc    |
| Providencia stuartii        | NC_017731_110028       | cctttggtgagcgcctgttcaactaaattaXagtaaacatc gatcggaaaggtgctatcg |
| Providencia stuartii        | NC_017731_113997       | caataaccattctgaccagccttatattcXcacacagttactcgtaacggcactaccag   |
| Providencia stuartii        | NC_017731_119027       | cacagcccgtattgccagagttagttggXacggttactgagctgtttattgctgctc     |
| Providencia stuartii        | NC_017731_126788       | gcataaacggtcaccgaacctgttggcXatcacggttgatgattgagcgataaattgg    |
| Providencia stuartii        | NC_017731_131329       | gattacgctggtcagcgggtcggttatXttgattattctggccagaatgcatgtag      |
| Providencia stuartii        | NC_017731_23019        | gataatggacctgagcttattcaaccaacXgacagaggagtgccgaacaaatgcgctg    |
| Providencia stuartii        | NC_017731_28796        | ctatcaagcgtgctggatacgtcctttacXcacgctgctcagcatcaatgtctctggcc   |
| Providencia stuartii        | NC_017731_32013        | ctgctacattgccaatgctggtgacttagXtcccgttattcggtcaggagaggtgcaac   |
| Providencia stuartii        | NC_017731_34311        | gtcaagccactgagttgatgctgagttcaacXatgctaccgaaggtgcttatttctctg   |
| Pseudoalteromonas atlantica | NC_008228_115552       | ggctaggagcagttacatcgtcacgtatXttgctctgcttaagtttcacagccac       |
| Pseudoalteromonas atlantica | NC_008228_117          | ccgctttacagttagcaccacacagttgtXtctcgcgggcaactgaggatgctgtag     |
| Pseudoalteromonas atlantica | NC_008228_127079       | gcgaaacagttgctcctgaatcggccacXgtctacgtcccgaaccattatgtatgctag   |
| Pseudoalteromonas atlantica | NC_008228_137232       | gagactgattgctgctgctacgaagataXtgaacgcaccggttcaatattctgtctgg    |
| Pseudoalteromonas atlantica | NC_008228_144544       | gttgtgcataagccaattcaagccaccXtaaccattggttcgcccgtgactgac        |
| Pseudoalteromonas atlantica | NC_008228_152992       | gttaaacgtactgacagcggccattgatXtgcagttactcagcggcaattgctatcc     |
| Pseudoalteromonas atlantica | NC_008228_15686        | cgaaccgctgttctagctgcttaactgcXgtgataattctgtactctcactgctg       |
| Pseudoalteromonas atlantica | NC_008228_172217       | ccagtttgattgtattgctggatattcaXccatcaagcgtgcaggctatgcacaccgg    |
| Pseudoalteromonas atlantica | NC_008228_32981        | gtgcctaatgattgctgctgttacgatcaaXgtggttagttaacggatacagattgag    |
| Pseudoalteromonas atlantica | NC_008228_39268        | gtcagacttctactgtcactatcgaatXtccggttgaagctgtccaactagtttc       |
| Pseudoalteromonas atlantica | NC_008228_87899        | gttgctgctggtgcaacgttaccgctgtcXtttagttggtgaagtaacacagcaacg     |
| Pseudoalteromonas atlantica | NC_008228_97352        | caccatggagcaggtggtttacstagtaXtatccatctggtacttagtagggcggtg     |
| Pseudomonas aeruginosa      | NZ_AFXJ01000001_156376 | gatcggtgaaatgaaagcagctatccggXctggatacctggtcatggtattcttc       |

|                                |                       |                                                              |
|--------------------------------|-----------------------|--------------------------------------------------------------|
| <i>Pseudomonas aeruginosa</i>  | NZ_AFXJ0100001_18479  | gaatgagtggtcgataaggagccagcatXagccttgatggcctggcaatc gatgctgc  |
| <i>Pseudomonas aeruginosa</i>  | NZ_AFXJ0100001_204019 | gacaaatccctcgcgtttccctgagcgcaXaccagttcacgaacaaatccaagcgctc   |
| <i>Pseudomonas aeruginosa</i>  | NZ_AFXJ0100001_225    | ccaaagtaattgcctgtgaccacctacgaXtgccgttcggcagagttaaatggttcgg   |
| <i>Pseudomonas aeruginosa</i>  | NZ_AFXJ0100001_37371  | ggttagagcgttaggctctaacgcttgaXttgtcacaatggaagcagcttgcgaag     |
| <i>Pseudomonas aeruginosa</i>  | NZ_AFXJ0100001_47375  | gfttagccatgtgtgaactattgggatgXgaactactacgtacagccttgcaggag     |
| <i>Pseudomonas aeruginosa</i>  | NZ_AFXJ0100001_52408  | ggcgagctggcgatcgtaattgccctcXttactctctgatcttgcctctcaggtc      |
| <i>Pseudomonas aeruginosa</i>  | NZ_AFXJ0100001_82330  | ctatttcaactctctcggagaacctXtggaaatcatcagcgctgatggcgctgctc     |
| <i>Pseudomonas aeruginosa</i>  | NZ_AFXJ0100001_93630  | ctcgactactaacggcctcaccgatgaacXgtctctatcattacgagcagcacaatc    |
| <i>Pseudomonas fluorescens</i> | NC_016830_104997      | cgggttagcggagccacgcagttgggtcaXaatgatcggagatcagcgtatgcagtaac  |
| <i>Pseudomonas fluorescens</i> | NC_016830_131297      | ctgttctctaaagagtgctgacaacccaXgctgcgcttcatcaatcgttggcagatgg   |
| <i>Pseudomonas fluorescens</i> | NC_016830_152891      | gtggcgaggagcttgcctctatggaacaaXcgttaaccagcagctgaacagattacc    |
| <i>Pseudomonas fluorescens</i> | NC_016830_168907      | gacgcttatcgccacgaagccaagtccagcXcagttgcttacctggtctatggcgacaag |
| <i>Pseudomonas fluorescens</i> | NC_016830_197447      | gcgcttactgtcttcaaaagacattgatcXacacacgcctgctgcctccatttgaag    |
| <i>Pseudomonas fluorescens</i> | NC_016830_2967        | gtattcgttctctcagaccaccaattgcaXtttgcaaaatgatcccgcgtgaccatcc   |
| <i>Pseudomonas fluorescens</i> | NC_016830_73269       | gtattctcgatcaacaggacaaggttcgXcaactgcaactggttgcattaacagacgc   |
| <i>Pseudomonas fluorescens</i> | NC_016830_82307       | cttcaaatggttgatactgtggccaaggXtctgctcgttggcgcatctatgacctcg    |
| <i>Pseudomonas putida</i>      | NC_018220_102641      | ctgcttagcttcatgattgaagctcagggcXcagccctacttctactcaagctatttcc  |
| <i>Pseudomonas putida</i>      | NC_018220_140498      | ggcgagcctgcggtgatgtactgaaccttXgttaagtgtattgattgatcatggcctg   |
| <i>Pseudomonas putida</i>      | NC_018220_196405      | ccgggtaggcaatgacggtagcgaagtcacXtgagcaactcatccttggattactggtg  |
| <i>Pseudomonas putida</i>      | NC_018220_208535      | ctcgatcccatgaccggttgatcggaXggcaattccttgaagccttattgatcttg     |
| <i>Pseudomonas putida</i>      | NC_018220_57289       | cctcaaggctcttacgtcaaggcctgggaXttgatccagctgatgttctgaaacgcg    |
| <i>Pseudomonas putida</i>      | NC_018220_95646       | gcatlgttattgctcctaataagaggttXcagcagcgtattgaggaagtggagatgg    |
| <i>Pseudomonas stutzeri</i>    | CP_0047441_106404     | gacggtaatggcaagaagctcggccgggtaXaacacactgatcatggacatgatcttccg |
| <i>Pseudomonas stutzeri</i>    | CP_0047441_118380     | cgaagagtctcgaacgatgctcagtgcttXtctatgattgtccgtactgtctcgaagg   |
| <i>Pseudomonas stutzeri</i>    | CP_0047441_125396     | cgaacgctgtc gatctgcttcaatcXaacatggcctggtggtagtgaagatgctg     |
| <i>Pseudomonas stutzeri</i>    | CP_0047441_142589     | ccttactatgccctcgggtttagacgtXtgtaataagacagggattgtccagctcgc    |
| <i>Pseudomonas stutzeri</i>    | CP_0047441_14899      | ctgctgtttacgccgtagccagcgtagccXagtagcttgatcatcggcctcaaacag    |
| <i>Pseudomonas stutzeri</i>    | CP_0047441_152815     | ctcggtgcgctc gatgttcaattcagtaXcgcctcaatgaagagggcacaattcgcac  |
| <i>Pseudomonas stutzeri</i>    | CP_0047441_37612      | catgcgctgattcgtttattgtctgcXcttccctc gatcgaagtcgccaggagattc   |
| <i>Pseudomonas stutzeri</i>    | CP_0047441_40436      | gccattaagggtactccatcgcgaacgatgXcgttatactcgcggttcttctcgttcgc  |
| <i>Pseudomonas stutzeri</i>    | CP_0047441_48724      | cggagttaccgacttgatgcttcaacgXgttcttccagacacatcgttaccgg        |
| <i>Pseudomonas stutzeri</i>    | CP_0047441_57168      | gttcgcttgcgatgctacggcaaccaagaXgtataggtaaatgcaattctcgaacgcg   |
| <i>Pseudomonas stutzeri</i>    | CP_0047441_64376      | gcatgatgttggatgcagcaccactagagXacgtttgctgagccagtctcaagattcgc  |
| <i>Pseudomonas stutzeri</i>    | CP_0047441_80569      | ctccattggaatctgttgcgcaactgXgttacgaccggctgatcaatcattggaac     |
| <i>Pseudomonas stutzeri</i>    | CP_0047441_86697      | gatggctcatggttcagatagcccttcatgXcgttccagcagctacgtctctcagc     |
| <i>Pseudomonas stutzeri</i>    | CP_0047441_99685      | cctaacctgagggtaatcctctgctccacXataaccactcaccactcccgcagcaacac  |
| <i>Pseudomonas syringae</i>    | NC_007005_11030       | ggcaagaagcttgcctctgtagtctgagaXtgattgtcgttgcagcagcgtgaccgattc |
| <i>Pseudomonas syringae</i>    | NC_007005_117716      | ctgtaacggccatctgctgctgttataXgggtattcctctgatattgcgccctttg     |
| <i>Pseudomonas syringae</i>    | NC_007005_163420      | ccggtgtcccttcaaacgcagcgtgttaXtcaagaacaagctttaaagatgcgctgctc  |

|                                     |                  |                                                                |
|-------------------------------------|------------------|----------------------------------------------------------------|
| <i>Pseudomonas syringae</i>         | NC_007005_172804 | gccatcactcaatagctctagccttgcagtXtgggtttaacttcacgagcgcagaaccac   |
| <i>Pseudomonas syringae</i>         | NC_007005_183831 | ctcgcctgcggctgatctagagttgtcaXaacttcagagactttcgaaagctttctgg     |
| <i>Pseudomonas syringae</i>         | NC_007005_194458 | ccacttgagtgctatagggagcgggttgXataccctctcaagtacagcatttatgacg     |
| <i>Pseudomonas syringae</i>         | NC_007005_202388 | ggcaaggtatcgtttaccttacctcagcXaccgactcttaccgcaatttgcctcacc      |
| <i>Pseudomonas syringae</i>         | NC_007005_27377  | ggcagatgtacaacatcatctgggattcgXccgaaccttatgctcgtcgtcgaactcg     |
| <i>Pseudomonas syringae</i>         | NC_007005_316    | cagtacttctcgtccattggaatgtccttXaccggcagagttctggcaggaagtggtg     |
| <i>Pseudomonas syringae</i>         | NC_007005_56937  | ctctcactctcgttgacactgggttcttXaacgtgttgacacgatggcagacaggacc     |
| <i>Pseudomonas syringae</i>         | NC_007005_76455  | caaatgactatttggccaggatcaccaataXgctagaccgtcactgtaatgctcgtgttc   |
| <i>Pseudonocardia dioxanivorans</i> | NC_015312_146255 | gaaatgagcctgaacgatgctgttctactgXagtacgttcgatgacgaccaaggagttg    |
| <i>Pseudonocardia dioxanivorans</i> | NC_015312_150313 | gttctccctgtacagctgtgctacagcXatcgtatgcttgaacagatcttcacg         |
| <i>Pseudonocardia dioxanivorans</i> | NC_015312_155636 | gctgatcttcagggtggcagtaggcaaacagXtccggttgcacagctacaatgaacgatg   |
| <i>Pseudonocardia dioxanivorans</i> | NC_015312_172427 | cggaaatgccagctctcggacttctaggaaXtctacccgtatcaggtgcgaaatcatgag   |
| <i>Pseudonocardia dioxanivorans</i> | NC_015312_196282 | ggactattggcgcaagatggaatcgagatXcgtaataaacgcgatgcaggtgatctgcg    |
| <i>Pseudonocardia dioxanivorans</i> | NC_015312_217226 | ggttagcgtatgtaacatgtagcgattgXgtgctgagcgacgtcatggacacctctc      |
| <i>Pseudonocardia dioxanivorans</i> | NC_015312_224181 | ctaggtcgagtgaggtgatgaaatcttXggaatcgcccatattcggcagacctccg       |
| <i>Pseudonocardia dioxanivorans</i> | NC_015312_235491 | gcggtattgaaatgagacattggtcatgactXtcttctgggtgacaacgatcacccgaatc  |
| <i>Pseudonocardia dioxanivorans</i> | NC_015312_28823  | cgttcagcaaggtcatttctccgagattcXacgtcacgaacgaagtgtcgtccactctcg   |
| <i>Pseudonocardia dioxanivorans</i> | NC_015312_36069  | gtccagggttagcaggtgtaagtggcgaaatXgtaataatgcgactagcttgaactcttacg |
| <i>Pseudonocardia dioxanivorans</i> | NC_015312_43169  | caacgaaataatcaggtcctgagggcgaaXaaatccgccgtgatgatctatgctgtg      |
| <i>Pseudonocardia dioxanivorans</i> | NC_015312_46082  | cgagacgggttccgatgtgtaattgcccXgctcggaaatgagaatgatgactactaag     |
| <i>Pseudonocardia dioxanivorans</i> | NC_015312_477    | ctcatctcaaatgaacgtcacagatgtagXctaggttgcgcttactgtgagtcgctg      |
| <i>Pseudonocardia dioxanivorans</i> | NC_015312_85225  | cgccggactgtatcgaccgtatcgattgaXcaacctccatcgacgtcatcgattaatgc    |
| <i>Pseudonocardia dioxanivorans</i> | NC_015312_8590   | ccgttccgaacgatacggaaatctgaaaccXgtcatcacgatagatccgggttacggaac   |
| <i>Pseudoxanthomonas suwonensis</i> | NC_014924_102437 | cctcatatggaccacaccatctgctagtaXgcttctatctgggtgtagatggcgacag     |
| <i>Pseudoxanthomonas suwonensis</i> | NC_014924_102532 | cacgatatgaaggtccagtaactcagggXctgcaatggccaaaggcatacagactttg     |
| <i>Pseudoxanthomonas suwonensis</i> | NC_014924_109751 | gtcgtcgcgtaatgctggttttatcacXgatataccgtctttgaccggctctcggcg      |
| <i>Pseudoxanthomonas suwonensis</i> | NC_014924_111463 | gatcagagcagctctctcgttcaatcaaaXccagaccgtacttgacgattggatgctc     |
| <i>Pseudoxanthomonas suwonensis</i> | NC_014924_13758  | ggtcgaactgtatgattctctcgtatgctgXtaatgctggaactcaacacttattatcg    |
| <i>Pseudoxanthomonas suwonensis</i> | NC_014924_57016  | gagacgctaggccagagctccttgcgaXccatgatgaagactgttcgtatgtaac        |
| <i>Pseudoxanthomonas suwonensis</i> | NC_014924_59156  | gattactggcgggataaagatcgagctcaatXaagcgcacaaagatccgaagtacgtacg   |
| <i>Pseudoxanthomonas suwonensis</i> | NC_014924_70730  | cgcttggcatacgtcgaagacggaagccXttagaatgattgttagcccgccctatagg     |
| <i>Pseudoxanthomonas suwonensis</i> | NC_014924_71020  | cccaagaaatctgcttctccgggaaatcgXaccgacttggcttactgtttggagttg      |
| <i>Pseudoxanthomonas suwonensis</i> | NC_014924_80471  | cttctaaaggatagcgttctctgatctgXgtagttcttctgagccggtagaccggtc      |
| <i>Psychrobacter</i> sp.            | NC_021661_11140  | gcggcactaatatccacaggcgttctgcaXaacgttcttggcagattggccaacaac      |
| <i>Psychrobacter</i> sp.            | NC_021661_17719  | caggcttaccaaattgatataagctgtgctXtttgaaggcagcagggtagctcgttctg    |
| <i>Psychrobacter</i> sp.            | NC_021661_38464  | cagggatgcctattcgtgcataggaatggXccaaatagagcagctatgcgcaatgtcag    |
| <i>Psychrobacter</i> sp.            | NC_021661_43596  | gtgctaatcgtaatctgtgcatgtttgaXactatgctgaacgcggctcaacgctaacg     |
| <i>Psychrobacter</i> sp.            | NC_021661_56540  | gatgtcggcgcttatgaatgacaagcatXcggggcgctttagtcaaatcagtggtcaag    |
| <i>Psychrobacter</i> sp.            | NC_021661_63053  | cagtctaagtgttacgtgagcgacctacaXggcgcaagaatccacgaatggttccg       |
| <i>Psychrobacter</i> sp.            | NC_021661_6500   | cgcgtagtctctgttctgatgtccatcaXtcttagcaagaaccgtcagcacacggttac    |



|                         |                  |                                                                |
|-------------------------|------------------|----------------------------------------------------------------|
| Psychrobacter sp.       | NC_021661_90539  | gtttgagtcgcagcgttaaattctttacaXctcagtaggaatcggtaaaccggctcttg    |
| Psychrobacter sp.       | NC_021661_95863  | gacctgcagcggatttagtctctattatgXcaactacagagcaaacgcgcgtttaac      |
| Psychromonas ingrahamii | NC_008709_111492 | cggattaatcttcgccagaacctctaccgcXagcatccataaagcgcatattgttgaccgc  |
| Psychromonas ingrahamii | NC_008709_117207 | cggtagattatcgcctgatgtaccgctgcXaggtgtaaaftaccctcccaattgcggtgc   |
| Psychromonas ingrahamii | NC_008709_124525 | ctggttgggtaataatcatcgggtggagttXggttctctgcctgttgaaaggacacag     |
| Psychromonas ingrahamii | NC_008709_137068 | ctaaatgcagatcaaacctaaacctcaXattgcttcagtgcttcgacacattcccgg      |
| Psychromonas ingrahamii | NC_008709_27464  | caaacctcgaagcctatggcgctgatctggXtgatgccttagcgttaattacgcatcgtg   |
| Psychromonas ingrahamii | NC_008709_36940  | gctggggagatactaaactaggcaacgttXctgttggttcagagatccactcactc       |
| Psychromonas ingrahamii | NC_008709_49747  | cgggtattatagttgatagtcgcgggtgtXtcatcatgtaaacctcgggagatgcgc      |
| Psychromonas ingrahamii | NC_008709_64757  | cgcatgttaaccggagatggtgaaatgagXaaagccacttaagatgttgcctccgctg     |
| Psychromonas ingrahamii | NC_008709_72809  | ctcgcgaactctccaacaggtagaacgcaXtgtagtggcccatcattgacattgatgg     |
| Psychromonas ingrahamii | NC_008709_97463  | cagcggagcgttgatctaagcggccagttXgaccaatattaccttaagccctaattgg     |
| Pusillimonas sp.        | NC_015458_106151 | gaagcttgaagaggtggcggtatgctgaXggtgcagaggcaaaagcgagttcatgctg     |
| Pusillimonas sp.        | NC_015458_113610 | gggtctcgtcatagctgagctctggttcaaXtttcgttgcgtaccaggtcaaggtaaagc   |
| Pusillimonas sp.        | NC_015458_129206 | cagegtataaaggaaactacacaactctccXgtcatcgcagatgaggtccagcttcccttg  |
| Pusillimonas sp.        | NC_015458_18028  | gtccgcttctgtacaattaaagagtttcXaagcccttgaagcagtttcggcgggacgcg    |
| Pusillimonas sp.        | NC_015458_25130  | ggcgctagctgataattgcttatgttgcaccXggcaaaagacatgctctcactgacacagtc |
| Pusillimonas sp.        | NC_015458_33131  | gctgaatgggatgcactagttcagtcgcgcXaatcattcattgaacacatgcaacacag    |
| Pusillimonas sp.        | NC_015458_471    | gtggcgcctccactctgcttggttggtXaccatgccagatcagatgctcttggctg       |
| Pusillimonas sp.        | NC_015458_59557  | gtgatcggtttgattcgattcaagtgttgXcaccgtcaggccatcagcaacatggcgcc    |
| Pusillimonas sp.        | NC_015458_66730  | cccgtgggtacggttatttcagttcggagXttgacctggaatatggcaatcgcacattg    |
| Pusillimonas sp.        | NC_015458_8391   | gctaggtctattgatcaacttgatggattXgccagattgatcacttgcctctggcgtg     |
| Pusillimonas sp.        | NC_015458_87780  | ggcagataaattgcttcaagataaggggtXttaccgcatataggcttacctgggtatg     |
| Pusillimonas sp.        | NC_015458_92622  | ggacaatagccgtagctattaagcagatcXtgaagcggcctgccaacaccaggttcc      |
| Pusillimonas sp.        | NC_015458_97044  | ctagggcgcgctgtatttcgaggtcagcatXtccattgttgatcagaatcaacgttgg     |
| Rahnella aquatilis      | NC_017047_136751 | ggcacgcccgatcccttattgcagatattXttcggcgtaataaccatcgcgcaattgcg    |
| Rahnella aquatilis      | NC_017047_144952 | ggttataatcgtttgcaggtcattctctgcXtataacctgtgctcaggaattccggcgcg   |
| Rahnella aquatilis      | NC_017047_165331 | gtaaacgggtgctcttaaagccaatcgttXgcaactgttgcctgacacctgtgcaacg     |
| Rahnella aquatilis      | NC_017047_36186  | ctgttgaacgcttctgaactgtgattcXatacgggtaagcatgtagggcgggataacg     |
| Rahnella aquatilis      | NC_017047_44957  | ggctgatttcaccgccccttctgactgtXcaataccgccaggttaacagtaacgctac     |
| Rahnella aquatilis      | NC_017047_53417  | caactggcgatgccacattgagattggctXttgatgataacgcaacgctctccttgg      |
| Rahnella aquatilis      | NC_017047_97705  | cccagcgtgcccgggtgatgccgataatcgXcatatttctggatcattaataacctgag    |
| Ralstonia pickettii     | NC_022513_118472 | ctatgcaatcgtggccgatactgacaggXtatacttaacaattgtggttgcctactc      |
| Ralstonia pickettii     | NC_022513_130482 | gtccaaagctgaaagcaatgtggaagtccaXactcgttggcggtcagctctctatctgac   |
| Ralstonia pickettii     | NC_022513_21781  | cggcgatctgcaaggaggcaatcgatgttgXagcaagtgcttaccgatccgataccttg    |
| Ralstonia pickettii     | NC_022513_36273  | cgcgaacaagtaatactcggctgtcaacXccgaaaagccaataaccgagctgatgctgag   |
| Ralstonia pickettii     | NC_022513_465    | cgaaggcaataactatagcgggcaatggttgXattccttctgctgatttgcagaaatgg    |
| Ralstonia pickettii     | NC_022513_60792  | caattctcatggttccactactcgaccggXccttcgaagccaggaaggaactcaggttg    |
| Ralstonia pickettii     | NC_022513_66983  | ctgccgtacgttagccggttgattggcttXaattccctatgtaacgttcacaaccggcg    |
| Ralstonia pickettii     | NC_022513_67164  | ccgcttctcagatcctgcgccggcatcgXgttgattgttctatcacaactctgctg       |

|                           |                  |                                                              |
|---------------------------|------------------|--------------------------------------------------------------|
| Ralstonia pickettii       | NC_022513_77659  | gattcgtttgctgtcgcgctcgtctttXtcgggtttgtttgtaaagagcctgtcgc     |
| Ramlibacter tataouinensis | NC_015677_106429 | gttcgtgtgtttactgagctggcttgXcggctgaagaatggcggtagccatgctctc    |
| Ramlibacter tataouinensis | NC_015677_123302 | cggtcagaacgaattgtgctccttgatagaXgatcgagatcgacacgccaagtgggtgc  |
| Ramlibacter tataouinensis | NC_015677_132528 | gtcgtgatcgagaacacatactgttgcXgtcgacaccgtgatgacaccgctgttc      |
| Ramlibacter tataouinensis | NC_015677_22255  | gtaagcctgcagcaagctgtgaaatcagXtgggtatgcctattagtctctgggtggac   |
| Ramlibacter tataouinensis | NC_015677_3560   | gctatccctagtgcgcccgtatctccaXcaaaggattgcgctgtgacgctaaagacg    |
| Ramlibacter tataouinensis | NC_015677_381    | cgcgtgttctcagcccatgttctgccttaXgtccatctgttgaatcacggctgaacg    |
| Ramlibacter tataouinensis | NC_015677_517    | gattcaggttcttgcgagcattgatcggaaXttagcgcgaatgcgtcgacgtgtatcagc |
| Ramlibacter tataouinensis | NC_015677_64128  | ggctttgagaattcagcttggctgcagccXcatcgcgccacttattctgttgaatccc   |
| Ramlibacter tataouinensis | NC_015677_78400  | ggaccggcgatcgttagagttagaaacactXctacttcaacggtaaccaacctgcgtc   |
| Ramlibacter tataouinensis | NC_015677_95849  | ctggtctagtaccgtagaccatgcgaggXcgcctgtctatgtgataactcctgaagttg  |
| Ramlibacter tataouinensis | NC_015677_98412  | cagccctgaagcagaactatgtccgaacXctctgataaattgcgcccataaaggtgtg   |
| Rhizobium etli            | NC_021905_10045  | cagcgttatgcaccgattctagagtattgXtttattgtcgcgggtgctggctaccatgag |
| Rhizobium etli            | NC_021905_108302 | ctgcaggtcagtatcgacctagacaatccXggcccgtctcaattgtgcataactggatc  |
| Rhizobium etli            | NC_021905_142028 | gattggaattggcgagccgcaaatcccXgctgatgctctgtcttctgatttagtcccg   |
| Rhizobium etli            | NC_021905_38880  | cgttgaagtcctctacgaggaatacaatgXactgcgcacctctgatgtgctgtctgtgcg |
| Rhizobium etli            | NC_021905_52034  | ggcgataaggttaggtgatgatcgtctgXcgccttacgcaacatcacgctcgaatattc  |
| Rhizobium etli            | NC_021905_71686  | ctcgacagttctactcgaaatcgcccXaatcatctggctgtatcttttaggtcgattg   |
| Rhizobium etli            | NC_021905_83773  | gaagcgtcatgccagtatgtgtctatgaaXacatctccgtgaaccggctccaatcccg   |
| Rhizobium etli            | NC_021905_91253  | caaattcgcgaacgtcattcccgaagaagXaagtcggagatcttattccgagccctgg   |
| Rhodobacter capsulatus    | NC_014034_104126 | gaagcatgatgctcctctgtctgatgXagacgatgcggtaaagggtgatgattgtgc    |
| Rhodobacter capsulatus    | NC_014034_111711 | ccattcagtaggttcttagttctctgcatXatagtgcgtaacgcttctctatcggcgag  |
| Rhodobacter capsulatus    | NC_014034_124285 | gtgcgtcacacgcgcgaagattcatatcXttatccagacctgccgcctgtttcagacg   |
| Rhodobacter capsulatus    | NC_014034_20805  | cagcctgtcgttatatggaactatataXccgcccttgatcgggtctcttgcggcg      |
| Rhodobacter capsulatus    | NC_014034_47570  | cgacgcgagtgatctgtctcagccttatgXtgaatgacattcagagccgtttgcgctcg  |
| Rhodobacter capsulatus    | NC_014034_69545  | gagcctctcgcatcttctgctgtgacggcttXaatgcttctcagagaagacacatggttc |
| Rhodobacter capsulatus    | NC_014034_91949  | catatgtgccattgcgggattataacgtgXgcagcgtgaagaatcacagaaagctgcgcc |
| Rhodococcus erythropolis  | NC_012490_127056 | catcgtgcgatcagagaagcccgcctctatXtcgcgaaagctgaacgaatgatgatcag  |
| Rhodococcus erythropolis  | NC_012490_207176 | gcctgtcgaactgggtgctgcgacggcgaXttcgaacagtgaattctcgactaccac    |
| Rhodococcus erythropolis  | NC_012490_30573  | gaaagtgttgggtccgacaacgtgaagtcXcagtagtacgctatctatccctctcgag   |
| Rhodococcus erythropolis  | NC_012490_39440  | cattgttacgctccagatgatattgctgXtgtgatctgacaataggcaaacgcatcgg   |
| Rhodococcus erythropolis  | NC_012490_96256  | gtctcattgtccgaattccaagaatcXgacttagtaccagagaataactggacgtcc    |
| Rhodomicrobium vannielii  | NC_014664_118017 | ctcctcgtctgtgattccctgcaacagctXttgaattcaagacttatggatagcaggc   |
| Rhodomicrobium vannielii  | NC_014664_125238 | caagacgctaggtctggttagaagcgtXggttatcccgttcacacgtctgtgtgagtg   |
| Rhodomicrobium vannielii  | NC_014664_15945  | caggcgtcttctgcatccgataatcttaXtcgctgatcggctgataaacgaccgatcg   |
| Rhodomicrobium vannielii  | NC_014664_18     | cggtagcgcctatgacgaccggttcttXaatcgtgatgttatatcgtggaattgc      |
| Rhodomicrobium vannielii  | NC_014664_31743  | ggtcatgctgctgtttgtccgcgattcaaXtgactgctcgaattctgacaacatcgc    |
| Rhodomicrobium vannielii  | NC_014664_53506  | caccagctcagttatgaactggagcacXgtatcccacactccaagcccacctaacag    |
| Rhodomicrobium vannielii  | NC_014664_79460  | cgtgctccgatcggaggcttaccctccXttacgatgatgatgacgttcttggagc      |
| Rhodomicrobium vannielii  | NC_014664_86091  | gtcttgatgaggaagaagcggatcgcgtcXttacgggatatgactagtcgtaagcagc   |

|                            |                  |                                                               |
|----------------------------|------------------|---------------------------------------------------------------|
| Rhodomicrobium vannielii   | NC_014664_89733  | gtcgaagcaagttcaccgttcgacatcXtatttcgtctccttctgaccgatatgtg      |
| Rhodomicrobium vannielii   | NC_014664_97637  | ctfgggtgcccaatttctgcacattaccgtXatcagggtcaaggatacagacccttgatg  |
| Rhodopseudomonas palustris | NC_008435_119068 | gtgcttccattcggttcaatttataccaXccggctcgaacacatgtccggaaggtcgg    |
| Rhodopseudomonas palustris | NC_008435_129897 | gccgagcagcatgggagggcttccgacaXtaatacacgacaataggattaccttggacg   |
| Rhodopseudomonas palustris | NC_008435_183189 | cgagtgatcgagatggaatccggcgacXgtcacaatactctgacactcccttcgag      |
| Rhodopseudomonas palustris | NC_008435_32873  | ctggccggaatggtatttcggaagtcttatXtggccaagcccttactcattgaaggacc   |
| Rhodopseudomonas palustris | NC_008435_39609  | gtgcttgcagaggtcaagccaattgatctcXgatttccgattaggactagcgctcggac   |
| Rhodopseudomonas palustris | NC_008435_60763  | cccgaactagatttcgtggaaatcacgttgXcgcactttgagcggagcaatgtgaacgatg |
| Rhodopseudomonas palustris | NC_008435_75919  | gcgagctatctcttgagaagcaggttgtaXgcctctgtttattcagctcttcaagtg     |
| Rhodopseudomonas palustris | NC_008435_90585  | cggtgcggagagcaaacgttggctatgtaXgcacataatgttgcattgtgacatctcg    |
| Rhodospirillum rubrum      | NC_007643_102683 | caacaagcctttggtatataagacaatXagcttctcgcctcggatgccctccagc       |
| Rhodospirillum rubrum      | NC_007643_110393 | cccaatagagcggctttaccacaacaacXaccggcatcatcggtttctagaccgaactg   |
| Rhodospirillum rubrum      | NC_007643_128656 | caacatcagaattgctctgctgctgatXgtcccgtaacgaaagaacacggccgtgag     |
| Rhodospirillum rubrum      | NC_007643_144248 | cgaaacgatggaacgaaccgttggcatgagXccgaacaatcaggtcgaacaaccaggatag |
| Rhodospirillum rubrum      | NC_007643_1554   | gcgagcgcgtgtaagcgaactggaatctXagaccaacatcgatcgcgccaattaacgc    |
| Rhodospirillum rubrum      | NC_007643_20198  | cgctgaagattagcttcaatctccgagacXgatttcatcggctacccttggcagtag     |
| Rhodospirillum rubrum      | NC_007643_27955  | cttcaccgttgggtactcctggacatgcaXaccggattgaggggtgatgacacctcgc    |
| Rhodospirillum rubrum      | NC_007643_32141  | gattcctgaggttgcgcttagcgtgtgataXaggcattgatcttatcatgcccttcc     |
| Rhodospirillum rubrum      | NC_007643_35923  | gatgtagtctctccggtaaacggaagaacXcaagccctggagatgttgggttggagggtc  |
| Rhodospirillum rubrum      | NC_007643_59185  | gacaagcaaacccagatgcggttcttcXttgaaaccatctccaggcttctctcgc       |
| Rhodospirillum rubrum      | NC_007643_72252  | cactgtgatgagcgtttacgtccattaXgcttggatgaggggtccgccctctatc       |
| Rickettsia rickettsii      | NC_016909_17384  | cattccggtagttacgggttatcggaXctgggcagattctgcacatactaggtctag     |
| Rickettsia rickettsii      | NC_016909_1892   | ccgattaaacctggaccggaagttgcagcaXcttgcaaacattgagccaactataaccgg  |
| Rickettsia rickettsii      | NC_016909_19514  | gttgtgtctgagatcctcgatcaagtcgXgtgcttgaccacgggacttatgtctgag     |
| Rickettsia rickettsii      | NC_016909_21694  | ctgcgtccgtgttcttaaatctctctXtctcactactaaagtgtacgctgtggtg       |
| Rickettsia rickettsii      | NC_016909_26782  | cgttctgtctcctcaaaattctctctctXtcaagtaagctgtgtacgctgcggtgctg    |
| Rickettsia rickettsii      | NC_016909_28900  | gggtgcagaatcatcaggtgcggttctgaXaaatgagctagcttatgacccgcaagagc   |
| Rickettsia rickettsii      | NC_016909_35342  | gtccgagccgacaccgtgcagtaatactacXataagccacaagcttataaatcatgtcc   |
| Rickettsia rickettsii      | NC_016909_38777  | cgccgattgctaggtgtacgtcgtagctXgttaaccggagtagtcggagattatattcc   |
| Rickettsia rickettsii      | NC_016909_586    | gtttatgtacattgcgattctcgttccgtXcgtgatctggactcgaatcctcactgac    |
| Rickettsia rickettsii      | NC_016909_6644   | caatgatattcggatccacggaacaatgXctgattgccaggttcgatgaccgctttg     |
| Rickettsia rickettsii      | NC_016909_7926   | cgaggctgattcctctactacatatttXattatgtcttcgagcagcctactgctgg      |
| Robiginitalea biformata    | NC_013222_101448 | ggaccagggtccgaggttccttacccttctXattgctgttcaggtctgtttaaagacc    |
| Robiginitalea biformata    | NC_013222_104023 | gcatccggttgggttcaggtcttattgtcXgtatgcgaaacaagccagaattcctccag   |
| Robiginitalea biformata    | NC_013222_20119  | cgcacctaaagttgctcccgttaattctcXgcattgcaatggctcatccactgagtcggg  |
| Robiginitalea biformata    | NC_013222_28     | gagcctgccgaattgaaccaggagctctXggaattcaacatcgagggaagtgatgagcg   |
| Robiginitalea biformata    | NC_013222_35124  | caacaacgccatcaatcgggattgtctcXcaagaactgctcgaacatcctgattgc      |
| Robiginitalea biformata    | NC_013222_42641  | gggtccctccaggcagttattctgtagtcXaagtagcctttaaagcgttcattgcctcc   |
| Robiginitalea biformata    | NC_013222_48612  | gtagtaaacgcttctccggtgatcgggttXaagcgggtgttgatactgttctgacg      |
| Robiginitalea biformata    | NC_013222_53796  | ctgtataacgtggtcttcccgtttcagXtaacaacggccgatttcggtttgtccacc     |

|                         |                  |                                                               |
|-------------------------|------------------|---------------------------------------------------------------|
| Robiginitalea biformata | NC_013222_62431  | gggaaagtgcgtatggtggcaatgcctccXatgccgtatgatagcggattgtggttaacc  |
| Robiginitalea biformata | NC_013222_69334  | ggtatctacgcaacatctgatgtgagcttXccgggttgacaatcacagcccgggtgac    |
| Robiginitalea biformata | NC_013222_83784  | ggcggcatagatccgataagagcggtttaaXattggcaatcggatggccacctgtcatc   |
| Roseiflexus sp.         | NC_009523_100086 | ctgatgctgggctaattggagattgagaattXagaagaatccgacatcatccgtcgtcggg |
| Roseiflexus sp.         | NC_009523_109466 | caacgaactccagaccggttccatccttaXtgagacggatcagttgtcgtcgtcgttcg   |
| Roseiflexus sp.         | NC_009523_122457 | ctggattgctgaatatctcaactatccatXtgccatcatgaactggcacgtcagcaacgc  |
| Roseiflexus sp.         | NC_009523_143577 | caacgttcaacgtcaacatcccgtccgttXcatcgtctctaccagaacattcgcacctg   |
| Roseiflexus sp.         | NC_009523_167216 | ctatcttgaaggagcgggagtatatgccXtgcacagaataatccatccgtaccgcctc    |
| Roseiflexus sp.         | NC_009523_193154 | cacacctaccgggatgtcatggcagcXgatgtggtggatctgacaggattgtgttc      |
| Roseiflexus sp.         | NC_009523_33330  | ggtatccgccgtttgacctgatacagcXatgatcagcactcgtgtcgtgtgtacg       |
| Roseiflexus sp.         | NC_009523_78891  | ccatcattcatcggatagaccctgatXttatggttcgtgatgaatcgggtgcatc       |
| Roseiflexus sp.         | NC_009523_92468  | ctcctgatccagagtgaggcaagatattXatagctacctgcaactccgtatccagcg     |
| Roseiflexus sp.         | NC_009523_9503   | ctggtcgtgtaattggacgcagagcgtttcXtcaatcagcgtcgcgagaagatcgtatc   |
| Rothia mucilaginos      | NC_013715_24765  | gtgaagaacgggtaccgcatccgtaagggtXgtgattctgggtattgttgcctgggtgaag |
| Rothia mucilaginos      | NC_013715_29163  | caggacatacagaagaagattgaatgtaaXgctggccctcttattgattcgggtgtgtgc  |
| Rothia mucilaginos      | NC_013715_34244  | ctctctacagcgtataaatctcttattXtagtagctcctcgtcagaaagcgggtagcg    |
| Rothia mucilaginos      | NC_013715_38515  | gaaagattacgagggttctcttgggttXtccctcgtggtgtggtccgtctatctgtg     |
| Rothia mucilaginos      | NC_013715_4581   | cgtattgcttaccaggagacagcactaaXatcccagatattcgtatctgccgcgtc      |
| Rothia mucilaginos      | NC_013715_58240  | gactttcgttcgaagatgttctgtgcaaaXtaccgtgattccagaccgaatgacttg     |
| Rothia mucilaginos      | NC_013715_64001  | gcagggtgcagaaggagattccgttactgttXtcagtggattgtttacgggtgagcgttc  |
| Rothia mucilaginos      | NC_013715_67924  | cgggcaatctcttctcctctaggtcXtggaaagcttccacctgacggataggg         |
| Rothia mucilaginos      | NC_013715_72149  | gtatgaacgatattagaccaaaggtattXatacagagagcgcggccgacagtaagcg     |
| Rothia mucilaginos      | NC_013715_9099   | ggcgcataaccgacagaatgagtcggccaXcttgcggctcaaatctttatgccttgttc   |
| Ruegeria pomeroyi       | NC_003911_109    | gcctgaccgctgtagagagggagcagacatXgaactgatgaagaacaatacaagatcgc   |
| Ruegeria pomeroyi       | NC_003911_127275 | gcaagagtttgcgatgacttacgatcgcXaagaacgcaattcatttcccggggcgcgc    |
| Ruegeria pomeroyi       | NC_003911_46602  | cctctactggttacagatgacgaccctaaXtttcgggcaggcaaatcatatgggttggg   |
| Ruegeria pomeroyi       | NC_003911_61935  | cgacgcggaacggcgtatctgtagatgttctXtgaacgtttccatttcggtatctccagcc |
| Ruegeria pomeroyi       | NC_003911_83295  | gatgtcctcatgatagtggtcattatgccXgtttgacagcagcgcggaatatctcggc    |
| Ruegeria pomeroyi       | NC_003911_85294  | gaacaacctaaatcaccgagaagtttggXggcgcactgtttgactacaaggtttggcgc   |
| Ruegeria pomeroyi       | NC_003911_90338  | cgattgtcattacagctggttgcgttctggXtgacattggaatgtctcggcatcgcaccg  |
| Ruegeria pomeroyi       | NC_003911_97627  | caatcagctacgtcgggtcgggaagctttXgtcaactatccaagccattgcctttgacg   |
| Ruminococcus albus      | NC_014833_115710 | gcagcggagatgtagagtagcggtaagtaXaaatgaatgcaggacagaccatccggg     |
| Ruminococcus albus      | NC_014833_36513  | gatatccggtgatggtgcatctcactgttXttatcagagatgctacacactgggtgc     |
| Ruminococcus albus      | NC_014833_49649  | ggctattccgacgattcaggtccgcaagXgactatattgatactccttcttaccag      |
| Ruminococcus albus      | NC_014833_6099   | ctttgccggttatgacagtatctcatgcaXaactgttcccgtaccgtgataaagacgc    |
| Ruminococcus albus      | NC_014833_83745  | gaggctcgaagaagctgatacagcagatXacaggcacactcaacagcgggtttcttc     |
| Ruminococcus albus      | NC_014833_93681  | gtgctttgaaagctcgccttfaagctcagXtaaagtcgtcaccctcatagttctcgc     |
| Ruminococcus albus      | NC_014833_98946  | ccgacagacttgcacgcagcggtaggtcXaataccgacaacaatgatataccaccgtc    |
| Runella slithyformis    | NC_015703_121835 | gttctgccgtaagcgtattccgttattXgccgttcttccagcaactgtacaggtcg      |
| Runella slithyformis    | NC_015703_12718  | gatatcggatgtattcagcactccgagcXgcatcagatcaatgcctgacgccatcag     |

|                         |                  |                                                                |
|-------------------------|------------------|----------------------------------------------------------------|
| Runella slithyformis    | NC_015703_133008 | gggaattgacaggtaccaccttaaacggtXcagccttccgttcatccattgaacaaac     |
| Runella slithyformis    | NC_015703_183830 | caagccaagtgggatttacgccgaatgttXatgaccgatcaggattggcagaactcacc    |
| Runella slithyformis    | NC_015703_205367 | ctgttctattggcctcgccttaagtatcgXatttcttggatggttgggttctcatagtg    |
| Runella slithyformis    | NC_015703_46344  | gcacggccttagcccacgattggactttgtXitgcggtatcttatctgtcttggccttgg   |
| Runella slithyformis    | NC_015703_67370  | cgtacgtatcgacgaaaggctgtacgggtgaXttgtattgggtggggcatcgggttagttg  |
| Salmonella enterica     | NC_003198_12768  | gtcattggaatcgtagcaacagcggaagcXatataaccgcgcggttggcgttaagttcg    |
| Salmonella enterica     | NC_003198_142719 | ggctgtcgttgtgattcgtctgtacgacXigtaccttgggttgggtcattaataaac      |
| Salmonella enterica     | NC_003198_148400 | caaatggcagcctatgcggaatcagctcccXggaatatctcacgtgataatccattgggtg  |
| Salmonella enterica     | NC_003198_153735 | ctataatggcgcgctcgcgctggataatagcXgtgacggtaagtgccgccttgatgaattc  |
| Salmonella enterica     | NC_003198_23558  | ggtagggagtgtagcagcctctgattatataXtctgtgttgggtgcaacctggttgcgcc   |
| Salmonella enterica     | NC_003198_36956  | cgttgcgggaagtatgtagcagggcattctgXcttgcgcggtgaaaggctatattcttc    |
| Salmonella enterica     | NC_003198_48856  | cgccgggacaattcttcccagggaaggtgXacaatccatcataataaataggttccctg    |
| Salmonella enterica     | NC_003198_78415  | gtagagaacgggtgatcagaattgtattgatXatgaggccttgcgttgttttagcggc     |
| Sanguibacter keddieii   | NC_013521_16732  | catttctcggcgtctacgggtgatggaaaXcaggtaaagtaagccttgcctgtctatacag  |
| Sanguibacter keddieii   | NC_013521_20765  | ctttatcaaggcaatgctcgttcgggcttXagacgtttatgtagagaggtctgctcgc     |
| Sanguibacter keddieii   | NC_013521_215    | gtagactgtgacggcattccgtcccttXctgtaatcaccgcaatcagcgtcttccg       |
| Sanguibacter keddieii   | NC_013521_31627  | gtccaagggtcatttgtgtagctcttgcgtXcattctgcggcctaagttgtgtggcttcc   |
| Sanguibacter keddieii   | NC_013521_38431  | cctacatctaccacaaataggtcttccgXacatgactcggctcgaaggacgtcagc       |
| Sanguibacter keddieii   | NC_013521_42889  | cggtcgaagaccagcggaaacgcttctaXggtagagttctcactcggaaatagacagaagc  |
| Sanguibacter keddieii   | NC_013521_56305  | gactgaggagaactgatgaagaggctggXatgggttaacggtaaacctctgacggac      |
| Sanguibacter keddieii   | NC_013521_60554  | gcagggtgacatataattgggtcgtacagggtXaagcaagaatgctgcacactgtctcggg  |
| Sanguibacter keddieii   | NC_013521_73057  | gatgtcatgactgccatgacagcagggccXacgatgctgatctatgacacacttccacc    |
| Sanguibacter keddieii   | NC_013521_92266  | cctatgaacgatccctgcgatccgcagcgaXatcgggtcgtataggtgagttgatgagg    |
| Sanguibacter keddieii   | NC_013521_97849  | cacttctaaggcgtcgaagttatcatcaagXgcctcggcgcagctcaattctcgcctatg   |
| Sebaldella termitidis   | NC_013517_119978 | ctgtaagcttgaagtgatgccacaccgaaXcgcagccattaccattgatgtcttccggg    |
| Sebaldella termitidis   | NC_013517_135689 | cgtatgctgctgttgcattgtcggcatttaXgtacagtactgcatcagccagaatcccc    |
| Sebaldella termitidis   | NC_013517_146242 | gccttggaaatccagatgtgttctcgcgXttacacatataagcctccgtttaaaccgc     |
| Sebaldella termitidis   | NC_013517_419    | ccatggcaatcggaggactgttggttatgaXgtacctctatctgttcatgatgagagag    |
| Sebaldella termitidis   | NC_013517_43177  | cacttaccgggtattcgcagaatacatggtaXataatgagtaaagctctggagcctctggcg |
| Sebaldella termitidis   | NC_013517_52236  | cggctactgacagactcgcgcttgcataagXcctgagttctgccccttctcaaatgcac    |
| Sebaldella termitidis   | NC_013517_70161  | ctatagaccgctggagccgagcgtggaggtXaataaataactaccggagacagcttattg   |
| Sebaldella termitidis   | NC_013517_8026   | ctgtcaccagttctaccttgcagctgttXcttggacctcggcatgaatatatgtggag     |
| Sebaldella termitidis   | NC_013517_80618  | ggcgcggccagctctatattctgtctataXtatgttccgttaccctgatctgcctagc     |
| Selenomonas ruminantium | NC_017068_1312   | gaggttctcaggttacggaatgcggctacXgtaggcatgatattctgtacgcaatgcc     |
| Selenomonas ruminantium | NC_017068_20338  | cttcggaggtagcagacaaggctacaagaXaggatctgtcttggccctcaaggctacgc    |
| Selenomonas ruminantium | NC_017068_23596  | ctgattctgggcacttcggagaatatgggtXgcatcaaggagcctaaccgcaccgtatc    |
| Selenomonas ruminantium | NC_017068_26103  | cacttctccttactgtctgtatcaggtgaXatgacgaactgcgttatgaaatccggctcg   |
| Selenomonas ruminantium | NC_017068_52126  | gcgtacggaatcgggaatgccaagggtcXtggatctcaatcatctgtcgggtaagg       |
| Selenomonas ruminantium | NC_017068_56425  | ccctcatctgctcctgatggtcatggagcXtgtacttgggaatgataggcccttattgg    |
| Selenomonas ruminantium | NC_017068_69316  | cgtcagcaccacataagcatcggcataatXgaaagaggtgtacggctgttgttctac      |

|                                |                  |                                                                |
|--------------------------------|------------------|----------------------------------------------------------------|
| <i>Serratia marcescens</i>     | NC_020211_103613 | caatgccagatcgtcatcccatttctctXcaccacgatgaacagcatgaacactatcgg    |
| <i>Serratia marcescens</i>     | NC_020211_110671 | gaggtagccggatcagttacttatggagXcttcaataataaatgtaagccgcatggggc    |
| <i>Serratia marcescens</i>     | NC_020211_143309 | ccaacgacctgattctgtttgccctgattgXagccgattatgctgccactcagaatacg    |
| <i>Serratia marcescens</i>     | NC_020211_159871 | cattcgttatccagatagccgtaagagccgXaaggtatcgttgacggctggacgctgttc   |
| <i>Serratia marcescens</i>     | NC_020211_168348 | gtgccgctgtccgacgtaagaagtacaacXttctacgcgctgaacgattattacatcgac   |
| <i>Serratia marcescens</i>     | NC_020211_174690 | gcctcattgcccagctaaccatccgctggXacatcattgcccctgaattatcatagtc     |
| <i>Serratia marcescens</i>     | NC_020211_19516  | gtcgttccatccgtatgaaacgccataagXaaagggcgaatattactgctggggcatcc    |
| <i>Serratia marcescens</i>     | NC_020211_32373  | ctaccgftaactttatggcctattggctgctXatctgatcggcgaacgcgatctggaccg   |
| <i>Serratia marcescens</i>     | NC_020211_538    | ctttctatgaaacatcgcgctttggccttaXtcccccagggacatcaaccacttaggag    |
| <i>Serratia marcescens</i>     | NC_020211_76436  | gtcatcggttaagagcatagccaaatgagcaXaatggtgtgtaggaggttagaccattcg   |
| <i>Serratia marcescens</i>     | NC_020211_90430  | ctgctcataaataaccacttcttgcggctXctctcattggcctgatatcgcctgcctg     |
| <i>Serratia marcescens</i>     | NC_020211_9244   | cctattaccgataagcagccggaagtgaaxAgcctgtagatcagctgacttctcgccaag   |
| <i>Shewanella amazonensis</i>  | NC_008700_102145 | gaactgctgactggcgatcatcatagatXgcctggcaagcattggttgatacaacatg     |
| <i>Shewanella amazonensis</i>  | NC_008700_119268 | gcaattggcagttcggccagatccttcXggttgctgagcttgagcattacagggccac     |
| <i>Shewanella amazonensis</i>  | NC_008700_12259  | ctgaagttgccgtaattgctctgtcattXcgttattccagctgcccattggagctgc      |
| <i>Shewanella amazonensis</i>  | NC_008700_25943  | gctgagattgggtcaatgctgttgatgctXttgtccaccttaacaccgatggcccatg     |
| <i>Shewanella amazonensis</i>  | NC_008700_32918  | gtatggctccgcaatctactcaataaXcaggtagtgttattcaggggtggccgg         |
| <i>Shewanella amazonensis</i>  | NC_008700_38     | ccaaagcggcgtttatggcctttatgccXtgttaaaggtagagccctggatccgacttc    |
| <i>Shewanella amazonensis</i>  | NC_008700_49720  | cgaagttcgcgtttgccctgtcggcaagaXacatccgcgaataatgctgtcatcaag      |
| <i>Shewanella amazonensis</i>  | NC_008700_59803  | cgactgtctcgtatgtccagattgaggttXaaggtgatgcgcaatccggtgagttgcagg   |
| <i>Shewanella amazonensis</i>  | NC_008700_6569   | cgatcacgtgtgcaggttcatgcgttXtgcacaatttctacatagatagtgcc          |
| <i>Shewanella amazonensis</i>  | NC_008700_66951  | ctcatcgttgtgcaggcgtatatacagXaaagcgtcctgatcgaagtttgcag          |
| <i>Shewanella amazonensis</i>  | NC_008700_78070  | ctgtcaaacaccgcttactgtcaccattXcgtgcttgaattctttgaggtgtcctgtg     |
| <i>Shewanella amazonensis</i>  | NC_008700_86303  | cactgaaaggatcgcggagtactcggcXggatgtttagctgtttgaacacctcaaac      |
| <i>Shewanella amazonensis</i>  | NC_008700_94285  | caccactcaagcaatactccacattaatXgccacacgctctatcgtctctgcagcg       |
| <i>Shewanella putrefaciens</i> | NC_017566_151835 | cgccctttgatatgacattggatggccataXtccgtgttgatcacaacacctgattacc    |
| <i>Shewanella putrefaciens</i> | NC_017566_152252 | gttaaagcgtcggagctgttatctaaXaattgcgcccaatttctgagaggtaaac        |
| <i>Shewanella putrefaciens</i> | NC_017566_160429 | cgcttagcgtctttctgtacgacagctXtgcaggctaacgactcattgatgatc         |
| <i>Shewanella putrefaciens</i> | NC_017566_160539 | gcccggcatacgaatatctgattaacgctXgtgtcctcaagtgttcgaacgatgacatgg   |
| <i>Shewanella putrefaciens</i> | NC_017566_52261  | ctaacaccagctccgctgttgatggatggtXgcttcttatttcatgctcaatagcagg     |
| <i>Shewanella putrefaciens</i> | NC_017566_64687  | ctacatccggtttcgggtctcgttagcXcttatagattaggtgtctaatgggatg        |
| <i>Shewanella putrefaciens</i> | NC_017566_71967  | ctttctgtatcggctccgtaacggcatgXctgctgatgtctgataacaaggctagcag     |
| <i>Shewanella violacea</i>     | NC_014012_102935 | caagcagcatatagatcgtgatcggacctXtcacagcatcatgctggcgcctcaaaagc    |
| <i>Shewanella violacea</i>     | NC_014012_132405 | gcccgtgatcctatcgccttctacgaataaXaacctgcccaagcctcaatggtaaatgc    |
| <i>Shewanella violacea</i>     | NC_014012_152020 | ccgtccgcttggccaattgtgttaggcctgXagctaaagaatcattaacacacagctagcag |
| <i>Shewanella violacea</i>     | NC_014012_165280 | catggctagtactgagtagtgcacccagacXttcaactgcattcagcttctagtggc      |
| <i>Shewanella violacea</i>     | NC_014012_16533  | gattcactgtttacggctagatcgtgtgaXgtctgctcgtgagctttaccctggccatc    |
| <i>Shewanella violacea</i>     | NC_014012_52226  | ggcaccattatcaagggtcaggatcgttXtgactagccacttctcttgaggctattcg     |
| <i>Shewanella violacea</i>     | NC_014012_70371  | ccagattactgtttgtggcaggcgtctgtXatctctacgctgaactgactaattctcg     |
| <i>Shewanella violacea</i>     | NC_014012_78421  | ggctgagaatcgcgtcgacagcttatcggXgtgtcaataagccttagcaagctctcatg    |

|                            |                  |                                                               |
|----------------------------|------------------|---------------------------------------------------------------|
| Shewanella violacea        | NC_014012_84     | ccgataatgccgaacattcaggtcgtggXtgggtgttgagtgagttgtcacggttc      |
| Shewanella violacea        | NC_014012_96031  | cgacaaggcaagcttagcctcaaccacagXaagttactgaccgccgtgctgattctgg    |
| Shigella dysenteriae       | NC_007606_125685 | ggccccacctaataacaggcactgacXgctctgtgggtgatgacggctgattacc       |
| Shigella dysenteriae       | NC_007606_23862  | gcaagagataactaccgacctccggtaaaXcattgtggctcaactgatggcactgatcc   |
| Shigella dysenteriae       | NC_007606_9499   | ccgtgaatctataaatgctcaattgcttXctgcaggggcaagctatctttagccccggcg  |
| Simkania negevensis        | NC_015713_10515  | gcctgtttggatgtcagtgcccttggXttatggagaaggtgtccaaactcatgc        |
| Simkania negevensis        | NC_015713_15237  | ccgaaattaaagtgcaatgggtgtccagXgaacggccactcaactggagcccttgag     |
| Simkania negevensis        | NC_015713_186    | gggtggagcaacgatctcgattcctcaagaaXttaactcatcagtgatgcactgtcg     |
| Simkania negevensis        | NC_015713_25450  | gagaataccgggtgccatattgagaagaaXctaacaacgctctgttaccaccaccag     |
| Simkania negevensis        | NC_015713_30429  | gatacggaggaatttagcatcgggatggtXaactttgaggctcatagcgaagaagtc     |
| Simkania negevensis        | NC_015713_38796  | ctcttcagtgattgggtgtcttcttaXtggctgtaactgggtggcgtcttgggattg     |
| Simkania negevensis        | NC_015713_41486  | ctcctgtttccgatgcgctcttggcattXgggattgaccacctgttactttcattgagc   |
| Simkania negevensis        | NC_015713_64131  | ggacaaatggcgcactttacagtcacctXctataatcaagtcgccctctctcaatc      |
| Simkania negevensis        | NC_015713_69526  | cgcataaagtgcaagttgcatggctgcataXcacgttatctgtgatccctgctgttg     |
| Simkania negevensis        | NC_015713_72837  | gcttaaaagcaacacatgattgtttgtccXgcccacagagatgacgcttctctgttg     |
| Simkania negevensis        | NC_015713_78093  | gcgtgttaagtcgctctttgtcacaggXactgtaatgagtaggctgcatcgaagag      |
| Simkania negevensis        | NC_015713_82914  | ctccacattgtcaactctgcataaactaaXtctccttggctttacaggcagcacctacgg  |
| Slackia heliotrinireducens | NC_013165_105    | gggacagagacgttcagaccacgctgccttcXaacctatgatcatcaacggcaagaacatc |
| Slackia heliotrinireducens | NC_013165_11801  | ccgctccaagataggcgggttagctaccXcacctatgcttataagtaactcatattg     |
| Slackia heliotrinireducens | NC_013165_20304  | cctgtgcacaattcggctccattgacgcaXcgtgttgagcgttagctccgtcgtttg     |
| Slackia heliotrinireducens | NC_013165_26020  | gatcctcgtacaggtcgtcatagcggcaaaXcgatgatgtgagcagcgtttatagatagc  |
| Slackia heliotrinireducens | NC_013165_39245  | ccattatcaggagatcatcctctgtatcaXccgaaacgcttcatcgcctttggcccacg   |
| Slackia heliotrinireducens | NC_013165_46874  | cgaatgtagctcagttgactatgaagctcXtgaagaacgaggtcgtgttgggtatttcg   |
| Slackia heliotrinireducens | NC_013165_50925  | cctcaggagtttgggttcgccagcatgtgcXgatgaactgcgaatactatgcatccatg   |
| Slackia heliotrinireducens | NC_013165_53336  | ggtatccgtgttgcagataaatcagcgaXcttctccagaacgctggcgtaaatgctg     |
| Slackia heliotrinireducens | NC_013165_62541  | cgatgtttaggaaggaaccgtctcgacggXagccgttgccttgggatggaacttctac    |
| Slackia heliotrinireducens | NC_013165_70240  | ccgttaaagtcctgtgcacgaattgtagcXtctctttaggctgtcggcatatagccg     |
| Slackia heliotrinireducens | NC_013165_82662  | caaagcattggaacgatcgcgttgagctcXcatttgggtggcgtgagaaccaagtcgac   |
| Slackia heliotrinireducens | NC_013165_93526  | ctggtcatatcttataaccactggccgtXcttgcgatgatggccagcatcgatacggc    |
| Slackia heliotrinireducens | NC_013165_97924  | cagtcgggtaaagcgtttgatcttcttgaXagcccgaacgcagcgggtgctcgaataatc  |
| Sodalis glossinidius       | NC_007712_100260 | ctggcgtatactggatgacgagagcgataXtttaccatgatccgatcgtgaagcgttgg   |
| Sodalis glossinidius       | NC_007712_105663 | gtttgatagacgatgatgcctcgcgtcXggatgttaccctccggtaaaaggctgtag     |
| Sodalis glossinidius       | NC_007712_120021 | gtgcctcactgtggaattaccctgaacgXgttgatgccattgattaccgctctgg       |
| Sodalis glossinidius       | NC_007712_12536  | catgggtatcgtttgcatattactgagctXcgtccagccggtcatcgttcgacctctgc   |
| Sodalis glossinidius       | NC_007712_129871 | gctttatcatcgattggctcgcgacgcctXtgaatatcaatcaacctgccgatattgccc  |
| Sodalis glossinidius       | NC_007712_202    | gcccagctttatcctccgggattaacctccXagccgccaatattgatattgacggcaagc  |
| Sodalis glossinidius       | NC_007712_22037  | cctgttacgataccttcgaggtgcctttXactgcaagaggggaataatgacagggcattc  |
| Sodalis glossinidius       | NC_007712_49649  | gccgcggcgatacaaggttgacgctacgacXtatgagggcatcagacattataaatatc   |
| Sodalis glossinidius       | NC_007712_63629  | cagctgattggcgataatctttatctgacgXcgtcagcgggtggcgccctacattaaccag |
| Sodalis glossinidius       | NC_007712_81343  | cttatcgtatgatgacgtgaaggataccttaXctgcgcatcaatgaccgctcaggtgtcg  |

|                            |                  |                                                                |
|----------------------------|------------------|----------------------------------------------------------------|
| Sodalis glossinidius       | NC_007712_86582  | gccagaatatggctttgtctgtccaccggcXggctcatcgagcatgacgctatcaataacc  |
| Sodalis glossinidius       | NC_007712_93326  | cgaacctattgctggagttcgttattctgaXgcatcggttatgggaaataccagcacaacg  |
| Sorangium cellulosum       | NC_021658_119240 | gatcaaggtatgcgctgacgatataatggTgcgatctgggcagatgcatgactgctgg     |
| Sorangium cellulosum       | NC_021658_23418  | cgtgattcttggacaaccactattacgGcXctccgatgcggcttccacgacgaagacg     |
| Sorangium cellulosum       | NC_021658_267104 | ccggctgtgctccggcatatcgttcatatXgaaagccatcgccatgatacggatacag     |
| Sorangium cellulosum       | NC_021658_318027 | gcttcaactgggttggcgtcctctctgtXtgacttcttttgcacgcgacatcgcaac      |
| Sorangium cellulosum       | NC_021658_324206 | gcacaatcagcgacttgcgcttcttccgtXtgacttcttccatcgagagaagcaagaacc   |
| Sorangium cellulosum       | NC_021658_367002 | cacggatgggttcagatccagaacggaattXccatacattccgaggactggtccgac      |
| Sorangium cellulosum       | NC_021658_390412 | ctgtggaccatgaaatagttcttctgatgcGcXtaagggctgctactcccggcagaaaggc  |
| Sorangium cellulosum       | NC_021658_434751 | ctggatctaggaaagcgacaactagctgaXatccgccctatccagctcttacccttg      |
| Sorangium cellulosum       | NC_021658_456624 | gagccttcgagctcgcgtggcaggatgattXactggatcaagtagtctatcgtacaacaatg |
| Sphaerobacter thermophilus | NC_013523_16254  | catataagctgttatactacgtccgtgtgaXcccgattcggcaacgcacattgatacagc   |
| Sphaerobacter thermophilus | NC_013523_18624  | ctgatacaatacgaacgtatgttcgctgtgXctctctcactaaaccacgcttgcgccg     |
| Sphaerobacter thermophilus | NC_013523_39869  | cacaagtagtatgcatcagtgaggagatcgXtcaactgcacatagttccaggcgcctgc    |
| Sphaerobacter thermophilus | NC_013523_4368   | gtttgaccgttcggaaccagaactcgtaxCctgattgctgagctcccggagaactgag     |
| Sphaerobacter thermophilus | NC_013523_52988  | ggctcattataacagaccatctcagggatXactgacacggcgtcatcgatacacacc      |
| Sphaerobacter thermophilus | NC_013523_72089  | gagcggagaagtacggcgaagataggctctXaatttcttgcgaagcagatggtcccg      |
| Sphaerobacter thermophilus | NC_013523_79349  | cctataatgtgatgacttccaggttcgXgcccgcctctcctgacatttagctgtgg       |
| Sphaerobacter thermophilus | NC_013523_84178  | gctgagccgtacattcgtccaacgaacaaXtgcagttgagaggattgacgtaagctc      |
| Sphaerobacter thermophilus | NC_013523_8509   | gtcggtaagaatgaatcaggcaagagtgaXgtagaagttcagcctgacattacgtgcctc   |
| Sphingobacterium sp.       | NC_015277_101075 | gattaattcctctagtggatccgttaagcaXittctgttgcgcattagaccctcccaccg   |
| Sphingobacterium sp.       | NC_015277_122195 | ggcacgtcaaaaggaagtcactctactctgaaXtaagctcagcagctgatcaaacgactgcc |
| Sphingobacterium sp.       | NC_015277_149167 | cgcttctaagggagattgcgctgccgaaaXgaccaatacctatgttgttgcggactgg     |
| Sphingobacterium sp.       | NC_015277_166829 | cggtgagattcctgcccattaggttaaXatccgattctccgaggcgtcgataccggc      |
| Sphingobacterium sp.       | NC_015277_19271  | gttagggcttccggcgtccacaagcaggXttatagagctcagttctcacaggtaacg      |
| Sphingobacterium sp.       | NC_015277_194073 | ctaacgtaattgctgacattaccaattggXcgcctaaccggcgtttagctgtagtatagg   |
| Sphingobacterium sp.       | NC_015277_28164  | ggcatcgtcgggatacgtattaaccctgXatgatattctagaccctcgtataagctg      |
| Sphingobacterium sp.       | NC_015277_60624  | ccctctgtgcaagtaaacgtaatccctccaXgcttatccgcaacgactttatgccc       |
| Sphingobacterium sp.       | NC_015277_71871  | ctcaagccggccagtaatgattaaacgaaXccgggtgagcggcaactttctgtagcc      |
| Sphingobium sp.            | NC_015976_108141 | catgatgtccgatcatctgggtgccattgcXggtaaccttgcgatagaattcgtgatgg    |
| Sphingobium sp.            | NC_015976_138952 | ccaggtttaatcagtcagtcgatcagtagtXcatgacgaccgatgcatcaccatgcaag    |
| Sphingobium sp.            | NC_015976_17653  | ggcggaaagaccatagcatctggttaacgaXttattgacctgtctaggaccatagccatc   |
| Sphingobium sp.            | NC_015976_23345  | ctccatttctctgtagacgagcacaacXccaatttctagcaggactctagaagggc       |
| Sphingobium sp.            | NC_015976_33462  | gattatgctgtaagtgggtgagacggagXcacatgctcgcctcaagacaatcaggtc      |
| Sphingobium sp.            | NC_015976_55698  | gataatattggaaccgagccaggatgaXcattgatgacgtcgcgagttctcatgcg       |
| Sphingobium sp.            | NC_015976_626    | ggaatcgtcgcctcaagttgttaagagXggaacttgggaagtcaccaatgagccgag      |
| Sphingobium sp.            | NC_015976_72148  | caagatcttcaacaccagtgacggcaccaXagtctatagcccaatctagatggctcag     |
| Sphingomonas sp.           | NC_020561_1708   | gcccggccttcttctcagtagtaattXcccgccttctgttccgttactatagtg         |
| Sphingomonas sp.           | NC_020561_29541  | gctcagggatcgaagatcgacgatgaactXggacttctggcccttgcctgaagttac      |
| Sphingomonas sp.           | NC_020561_49610  | ggcagggcggatatttctcagatcagXtccatataatcgtgcatcgtcagatcgtc       |



|                         |                  |                                                               |
|-------------------------|------------------|---------------------------------------------------------------|
| Sphingomonas sp.        | NC_020561_72376  | ggatatacctcgaatccgaaagctgctgcaXtgccacggaagtagcgatattgagggtgc  |
| Sphingomonas sp.        | NC_020561_9084   | gcaatttctctctacgaacgcaacggattXcttcacctgaaagtcgccaggccaatccc   |
| Sphingopyxis alaskensis | NC_008048_10021  | catcaggaaggcgactgatagcgtttgatXttcgagcatcagcacagcgtgtactgacc   |
| Sphingopyxis alaskensis | NC_008048_19671  | gaccattggacattgatcagcgtctgcttXttgtcaagaggtcttcgctcgtcctgc     |
| Sphingopyxis alaskensis | NC_008048_30735  | gtagaggaagcggcctatatattgaacgacXtatgtctgcccgatcgcgacgatcagc    |
| Sphingopyxis alaskensis | NC_008048_36888  | gcgatccaagaagctcatcgagcagaataXtccgtcaggaaagtgggtacaggctgatg   |
| Sphingopyxis alaskensis | NC_008048_4208   | gtttcctcttgggtcggctggctgaatXgatttcagtcggtttgtaattcgtcgc       |
| Sphingopyxis alaskensis | NC_008048_42544  | gaccgggatcgtgttggtatcgacgtcataXcgtgatgacatcaacgcctcaagtaggtc  |
| Sphingopyxis alaskensis | NC_008048_69929  | caagtaacaatcgtaactgttgcctaaXagacgtcctactcggccttggctccgtg      |
| Sphingopyxis alaskensis | NC_008048_72569  | gacatgagactaatcctgtatcagggtaXacgagcatttcgtgtcggctgttcg        |
| Sphingopyxis alaskensis | NC_008048_86827  | catgtcttcggttgtccgagcgttgaXcgtgatcctacatgctcgtctctatcgg       |
| Sphingopyxis alaskensis | NC_008048_94259  | ctgtcatccggcacaacgatagctttgXgctgattgacagaaccaatcagggtgtgc     |
| Spirochaeta sp.         | NC_023035_107106 | cgaagacaatctgggaccgtgctggaacaXcgtggtgtatcagaataggattgaaac     |
| Spirochaeta sp.         | NC_023035_121922 | ggatgcaggctatgggtgtggtgacctXcaagctgtcccatcagcaattccag         |
| Spirochaeta sp.         | NC_023035_125389 | cggatactgtcactcctgcctcaaatXctcccaattcccggattctgtgtaccatc      |
| Spirochaeta sp.         | NC_023035_40115  | ccgtttggtcttgataatggtgaacccgXtcaaaagcaggatgatgcggaactgattc    |
| Spirochaeta sp.         | NC_023035_59348  | gatagcgttgagccttctcctccagggaXacatttcggtattgtctatggtgccgaag    |
| Spirosoma linguale      | NC_013730_113528 | ggcattgagccagtcctatgcttctgtaXctcttctcgtcgtatattcattgacggc     |
| Spirosoma linguale      | NC_013730_127089 | cggaaagggacgtaaacacaggtcgtcggXtcttcttccgcatattccattgattc      |
| Spirosoma linguale      | NC_013730_154680 | gaaactaacctaacgagacaggagaaaXcaggctatacctaccgttggttccggaatg    |
| Spirosoma linguale      | NC_013730_184460 | ctttaccatcgacaaactgtacacctgcctXtctgattgggttcaggcctgtcagcgtc   |
| Spirosoma linguale      | NC_013730_198114 | gttcatccaggttatggacattcgtccatXcacatagacttcaaagtgggcgtctccgg   |
| Spirosoma linguale      | NC_013730_211991 | gttataggccgaatcacgcttattcgggXgtagctctgattggttacgtggcgtatcg    |
| Spirosoma linguale      | NC_013730_226885 | ggccgaagtagtccgtaagtctgttcggXtatgtcgtgagctgatttcctcattcc      |
| Spirosoma linguale      | NC_013730_241945 | gtttgtctgcttctatggcagcatcggcgXttcatgaagaactcctatcagcgcattc    |
| Spirosoma linguale      | NC_013730_256603 | gtcaggctgttgaccgaaagtgagttagtXgggcttcccagccatggtttcacaccac    |
| Spirosoma linguale      | NC_013730_25764  | ctgaatacctgaacatataacagcagatcagXcgtgggtacagctatctcgtgtccgatg  |
| Spirosoma linguale      | NC_013730_3      | gctgtctgaatgtacatcaggagatttccXtgcagcgtgaagtaacgacgtgtggaatc   |
| Spirosoma linguale      | NC_013730_38398  | cgaccgtagcctggtgtggtgagctgtctXtcttacaactcaataaacctgcatcacc    |
| Spirosoma linguale      | NC_013730_54644  | cctcgaagaacaaccatcgcgaactagcXgcgaaattaccctggcaggtgaaagtaac    |
| Spirosoma linguale      | NC_013730_97887  | gtgacttcaaataggcttcgggcgataatXtctatctgaccattcgtctgatgcttcc    |
| Staphylococcus aureus   | NC_002745_10527  | gcbgcgaaagtatcgacaaatccagcgcacaXtggacgattgtgttctggcaattgattc  |
| Staphylococcus aureus   | NC_002745_16009  | caatgttatccggtgagccagaagggtccXaccgcagcttatttaaagcaacatcacgtg  |
| Staphylococcus aureus   | NC_002745_60495  | gcgctgaattgctactggtgcaccaccgtXtggcattaggatcagttgtcggcgtgatg   |
| Staphylococcus aureus   | NC_002745_62057  | cattgttgtgccgacgccagtcactgatgtXggcttggctgttggtaacctcaac       |
| Staphylococcus aureus   | NC_002745_6663   | gatacggatgcctatgtagcaccgagtaXaagaaggcattgcctatcatggactatgctc  |
| Staphylococcus aureus   | NC_002745_69972  | cgagaatcttaacaccgtttaaagcgaaaaXaacacgctgaagatttctagcgcgtcgc   |
| Staphylococcus aureus   | NC_002745_71518  | gggttatgggttatagaccggttggcgXtcttgatgtagtctatgatgtggcattgc     |
| Staphylococcus aureus   | NC_002745_77653  | catgtgcaatcgtcacaaccgcacctgattXacctcctggtgaacatgaccatacagttag |
| Staphylococcus aureus   | NC_002745_85188  | catctgagcttgaagtcggtatatacgaagXgttctgatggcgcgaattatcagctgatg  |

|                              |                  |                                                               |
|------------------------------|------------------|---------------------------------------------------------------|
| Staphylococcus aureus        | NC_002745_87000  | caagtgctctacgtgaactggttcacgtgXcgacacctgggcatagatgtctgttttc    |
| Staphylococcus aureus        | NC_002745_89723  | ctgtttgcgctttcgcctgactgtctggctXgagctaagtcaccagtgatgtagtattac  |
| Staphylococcus aureus        | NC_002745_91721  | gccttaacagttacacttatataagcatcaXggctctaagtaccgtcccggtccacgc    |
| Staphylococcus aureus        | NC_002745_92669  | ctgatcatcagttgcagftagcgtatgccXttcaatcacacctttgatgacggcacacg   |
| Stenotrophomonas maltophilia | NC_010943_104151 | caatccaaggatacgggaacttggtgaaXcacagcctgtccaacgcatcaaatgctgc    |
| Stenotrophomonas maltophilia | NC_010943_151074 | ctcaagtctgatcgagcatccactgagcaXttctcagcagcatccgatgcttgatgatg   |
| Stenotrophomonas maltophilia | NC_010943_156671 | gacactgtccatgtgattctcactccatacXtcaattgcatccggcgttgattactggc   |
| Stenotrophomonas maltophilia | NC_010943_1600   | ccgcaaggctactgtgagtgacacaaatgXactgtgagcagggttacaactgacaaggc   |
| Stenotrophomonas maltophilia | NC_010943_43081  | cagcgtgtgctgggggttccgacgagcgcXacaggataaacaattacaattgctcttcc   |
| Stenotrophomonas maltophilia | NC_010943_57738  | ctagcctgtgcctcaactcaacaacctctXttatgtcttgagacgtttatcgggcaagc   |
| Stenotrophomonas maltophilia | NC_010943_63344  | cggataaacagtagttgcagatgggatgcXaatccaccggaaagtcttgaggcgcatac   |
| Stenotrophomonas maltophilia | NC_010943_646    | ggggaactgtactgttcaactacggttcccXcgcttctagaggatgccgatcgcagttc   |
| Stenotrophomonas maltophilia | NC_010943_65281  | ggcaccagatgcctacgaactaaagcgtgcXgcttgagtgaaattgattctgcatgagtc  |
| Stenotrophomonas maltophilia | NC_010943_70094  | ctcactccggcctaacctcatgacatgccXcagtgagtgatctgaaggactattggc     |
| Stenotrophomonas maltophilia | NC_010943_83724  | ggaaactgactgtattcccttggagatcXgcgatgacgataaagcgcatacagcggctg   |
| Stenotrophomonas maltophilia | NC_010943_86201  | gatgaacgtccgtcattccgatgctgcgaaXtcaagccaccttccgagatgattgtcc    |
| Stenotrophomonas maltophilia | NC_010943_971    | cagaggaacagctcgtcctcaacgtcattXagcaggcgcataatgatgtgcaggagg     |
| Stigmatella aurantiaca       | NC_014623_12631  | cgggattataaactcaccgtagagcgtaccXttgttttagatcctgtgcctcagcggatg  |
| Stigmatella aurantiaca       | NC_014623_200846 | gagcgggtgtttcttctaccgctggagaatXgtatctcgacaactgggtgtaaccggac   |
| Stigmatella aurantiaca       | NC_014623_297822 | ggcataccctcagttattcaagaactacXttagcatcccgcgtgccagcacctccgcag   |
| Stigmatella aurantiaca       | NC_014623_330109 | ctattccgcttggcatgcaatgcgctcaaXatcccgaacaaatgatgattgtgagc      |
| Stigmatella aurantiaca       | NC_014623_36351  | ccgtgccacgcaagcagtgagctgtctXactttgagataaaagcattgtgtgtagg      |
| Stigmatella aurantiaca       | NC_014623_53730  | ccgagaggatgcatatgtatcaatgctagcXatttctaacgggatgctgaaatgcgccg   |
| Streptococcus agalactiae     | NC_004116_19170  | gaacgagcgggaggattagacaatcacaagXtgcgtcaagtccctcagtgctgacatgc   |
| Streptococcus agalactiae     | NC_004116_19742  | caaggtagtttcagctctgtgtggtttatgXagaccaaggctgcgatggtgctcggag    |
| Streptococcus agalactiae     | NC_004116_27409  | cctgggctgctttgacagtatatgaacgtgXctatgaaagcgggctgtagggcttaccag  |
| Streptococcus agalactiae     | NC_004116_29238  | cagagcgtttataaattacctgctaaggaXattcagagcggatagcctatggcagctgc   |
| Streptococcus agalactiae     | NC_004116_34470  | gtttaccagaaccgctagcatccgtgaagtXtgcataatgctctcataatggccgcacgac |
| Streptococcus agalactiae     | NC_004116_47992  | gcgttcaccatcattagtgtcattaataXcactccgcctcggcaaggtattgtctagc    |
| Streptococcus agalactiae     | NC_004116_62051  | cacgatcagcaaggctcaccatggccttaaXacttgattgtgacaatatcgaatggcctgc |
| Streptococcus agalactiae     | NC_004116_65343  | gatgataaatgcctgctgttggactttXaatgcatgtccttcttctgctgaggtc       |
| Streptococcus agalactiae     | NC_004116_69742  | gtgtgataaagcggagacctgtcgattXagagccacctctcaggaaattgtgagagttc   |
| Streptococcus anginosus      | NC_022239_11592  | cgttctctggaagaagtgtctaagccgtctXcgtttgatgaacagatagagcgcattcag  |
| Streptococcus anginosus      | NC_022239_14548  | gacgtgcgaagtctgcatggattccaagtXgcagcattgccgaagtctctatgtaaaag   |
| Streptococcus anginosus      | NC_022239_19613  | ggagcaaacacgaatgtactgtttatcaXgctaactgttctagcggcgttgcaatgtg    |
| Streptococcus anginosus      | NC_022239_21538  | cgaftgaagtgaagcgtccgaggaacaaXtagaattgatgaacaacaaattgactgc     |
| Streptococcus anginosus      | NC_022239_21568  | ctttagccaagacgaagtcgcaaggcagcXgtgatctgcatgaccaatccactgtgac    |
| Streptococcus anginosus      | NC_022239_27912  | gcccagttgcccagatgacgtgtgagcggXctaaattcaacctttgtgttgcagtc      |
| Streptococcus anginosus      | NC_022239_31656  | ccgattacagcgtctccgctaactcatXgccttctataaaatgctggatctgac        |
| Streptococcus anginosus      | NC_022239_36681  | gcgaaactgctgaatgccttgagcagcXttacttctcctggaagcctcagtagcag      |

|                            |                 |                                                                |
|----------------------------|-----------------|----------------------------------------------------------------|
| Streptococcus anginosus    | NC_022239_38742 | cggtgacggctaaacaactgacgcatttgaXcctgtatcatccagatcttgcgccaaag    |
| Streptococcus anginosus    | NC_022239_61092 | gcbgacgtgattccgctgatgagcgtaaatXactgctccgatgcggtgattatgtgggtg   |
| Streptococcus anginosus    | NC_022239_9663  | ctagagcgattggtgtgacgagagcaactXctcctgatgcggtgtctgtattacttg      |
| Streptococcus dysgalactiae | NC_019042_1465  | cacatggccatacgttgcatagattgaaXagaatctccacttacttgcgtaccaggcc     |
| Streptococcus dysgalactiae | NC_019042_15725 | caggtatctgctggacgctagttagatXacttctgaagttgagaggttagcgattgc      |
| Streptococcus dysgalactiae | NC_019042_27820 | ggtttgacttgcaactaaggattgcctcXaagactacgaaccggtcacaccacaattgc    |
| Streptococcus dysgalactiae | NC_019042_46899 | ccttgatcaactgttacttgcgccgtgXcaatctcgtgatcaattctacgtcttctg      |
| Streptococcus dysgalactiae | NC_019042_67921 | gctttggttctgctgaatcagctattccXagatttgcgctgaaaggcagccgaagc       |
| Streptococcus dysgalactiae | NC_019042_7969  | ctgagaaatcaaccacatgtcagtttgaXgtggcaatgtagggtaagccgacaggtg      |
| Streptococcus mutans       | NC_004350_2024  | gagaagactttgtaaaatcaaggcgXggtcttccactcccttgcgctcagttg          |
| Streptococcus mutans       | NC_004350_4133  | gcbgctcagtttgcctcctgctggttgcXtgcacaactgtagcaattagtgccaag       |
| Streptococcus mutans       | NC_004350_4779  | cggactttgcgactagcacgttgacctataXtggctcttctgattctgcactccgggtc    |
| Streptococcus mutans       | NC_004350_5010  | ctaaaagaactcagatgaaacaggccgtgXtctgctgtctgagcgtccctcagttag      |
| Streptococcus mutans       | NC_004350_56458 | gcbgtccagagcatctaaagttgctgccgXtccagaattatgttagtcagttctctagc    |
| Streptococcus mutans       | NC_004350_57951 | ccatgtaaacgtgtccagcttccgtatgctXaacatgatgaacatcattgggatgcbgag   |
| Streptococcus mutans       | NC_004350_7540  | gactgtgcagattgccttgagcttgagcaXgcttgcctgtattccctattaattccg      |
| Streptococcus mutans       | NC_004350_9442  | gaacgttgattctggcttctggtgattgggXtgcacagctggcagcagatggtattctg    |
| Streptococcus mutans       | NC_004350_9906  | gacgcgcaacagcacatataaaagcgtcXaacgccgagttgccgtttgttacaacgg      |
| Streptococcus salivarius   | NC_015760_11186 | cgcgtgaagctgctggtgatgatgttcaXaatctacggatgctgaaggtactgtggcag    |
| Streptococcus salivarius   | NC_015760_19989 | cagtcgctcaacaacacaactgacggctaXcaacagcggtaacaactcagtggaacagc    |
| Streptococcus salivarius   | NC_015760_23999 | catcgaatttgaaggcaccagtgtttgttcXcaggtccatcaaatgtccattaccctcag   |
| Streptococcus salivarius   | NC_015760_24032 | gagtgacgggagtgctgtttctaccagXctcgtgtgcttctagggagattgtag         |
| Streptococcus salivarius   | NC_015760_24761 | ccgaaacgggtgcaacgaggaattgaggaacXacatgatgagctatgacttggcagctgctg |
| Streptococcus salivarius   | NC_015760_24806 | ctggattggttcgtatacggataatcaagXcgcactacctcaagattctgatgtgccag    |
| Streptococcus salivarius   | NC_015760_26107 | ggtgtctccttggactgtctaccatcggcXaaagtgatattgtctcctgtaacttgacg    |
| Streptococcus salivarius   | NC_015760_29414 | ggaacgtgaagaacctggctgtcctactcXacatggttggtaaccttttagctgctc      |
| Streptococcus salivarius   | NC_015760_53822 | ggattggtcagttggtaacttaagtccaXatcttctgaccttgacatccgctgagacg     |
| Streptococcus sanguinis    | NC_009009_13365 | gtagacggcgtttagtaagatttcttggXttctatgccctagcttctggtgcaagctg     |
| Streptococcus sanguinis    | NC_009009_1823  | ccagactggctgacagctctcaatagctcXatttctctgaccttatecagctggatcag    |
| Streptococcus sanguinis    | NC_009009_21286 | ggtgtactagtgctgtagatatggaagcaXtaacaagggaatccaatgcagctggaagag   |
| Streptococcus sanguinis    | NC_009009_26936 | gtgttcgaaacgtcgagctacagatacaaXgctcaaccagttctcaagtgaacggctc     |
| Streptococcus sanguinis    | NC_009009_29720 | gtaaccttggctgctgagatagatttgXcaggcagcggctctgactgatgagcctttg     |
| Streptococcus sanguinis    | NC_009009_33651 | ggagaaggctatgaaggcaataagttgatXagtccagaggcaatcttaagaggttgcg     |
| Streptococcus sanguinis    | NC_009009_43666 | ctggtactactttatagaagtcgcttXgacatctgtccaagtattgctcaagcgttc      |
| Streptococcus sanguinis    | NC_009009_48520 | gaaagggccacgatctgctgagaatctgaXgctgtaaggcttggccattggacagttgg    |
| Streptococcus sanguinis    | NC_009009_54351 | ctctgtgaaaggtaagaaggagactacXcctctatcaggacttctgttctgctgctg      |
| Streptococcus sanguinis    | NC_009009_75150 | ccagacctactatgcttgcagcacaggaaXctgccgaaatggtgtccaccttataag      |
| Streptococcus suis         | CP_002007_14366 | cgtcttaaacggtgaaggtaattgacagXgtcgtcctcaaccaacttcttctgctcag     |
| Streptococcus suis         | CP_002007_20063 | caagatgaccaagattccgttagaccgtatXtggtaaggtagcaaatctgaagacagctc   |
| Streptococcus suis         | CP_002007_23979 | ccaagacctgaccttctgagcaggaggaXgtgctcagatattcttcttggctcctctg     |

|                          |                  |                                                                |
|--------------------------|------------------|----------------------------------------------------------------|
| Streptococcus suis       | CP_002007_27963  | gacagaagtgacgcttcaaatgatggcttXgtcaactattgactggcagccctccaac     |
| Streptococcus suis       | CP_002007_32407  | ctgcaattaggcgctcagcactcttactagXtataggttggctccagctgcttgaatgg    |
| Streptococcus suis       | CP_002007_34330  | cttacggacttacctcttggcgcagcactXaaaggcaatcgtagaagattggcctcgc     |
| Streptococcus suis       | CP_002007_63273  | gttcgcatattcgtccgtatcagggtcctXctcttgagcttgccttcttccagtttg      |
| Streptococcus suis       | CP_002007_66652  | ccaactccttggccttatcagccagatagXgacctcttctcgcacttggcagaccag      |
| Streptococcus suis       | CP_002007_69304  | gaagcccttggctcaccaccgtacatgatXttcttggctgcttgaatcgctggctagc     |
| Streptococcus uberis     | NC_012004_10215  | ggccttaggacgagaattgcatagggcaatXgctgactacctaattcttacgaagactgcc  |
| Streptococcus uberis     | NC_012004_27271  | ggatagctggattgacagcgaatgggtgcXtagggcgcctctccaatacataatagag     |
| Streptococcus uberis     | NC_012004_34102  | gttggacattacgacttcttcttggcccXgacagctgcaacaaatccgtaggctacgc     |
| Streptococcus uberis     | NC_012004_35083  | cactcctcgtagaattgctctaagtaagtcXctgacgtgaattgctagcgcctgccatcc   |
| Streptococcus uberis     | NC_012004_4974   | gatagcctggcttctggcgaattcctgXggccttgcctgctatctgattgaagtaacg     |
| Streptococcus uberis     | NC_012004_5260   | cagtgactggcgatgccctaagctatctXtggctgaacaaatcaggttgggtgacac      |
| Streptococcus uberis     | NC_012004_56114  | cgctacagatcatattcgtgttctcttXacaatatctgtgccgaacacttagctagg      |
| Streptococcus uberis     | NC_012004_5935   | cttgggtggcctattagcaggatagttXctagcttgggaatgggtcaaggctttag       |
| Streptococcus uberis     | NC_012004_60068  | ctattctcctgggtgtgaaatcttgcgcgtgXgtctcatcatgattgggtgctactctgg   |
| Streptomyces albus       | NC_020990_119859 | cggaaactgagatgagattggcatagggcacXatacgtgtagctgtggcagatgctggggag |
| Streptomyces albus       | NC_020990_127775 | gaccaggatggctactgtctctgattcgtXttccatccactgctcgtctgtagagttc     |
| Streptomyces albus       | NC_020990_134455 | gttgcctggtgttctgtagtcttgggtgXaacacacatccactgtgaagtggtgtg       |
| Streptomyces scabiei     | NC_013929_141861 | cattcttgatcaactatacacgccgatXgctggagtggtatggaccgactcctcc        |
| Streptomyces scabiei     | NC_013929_290479 | ctttctagtcctcgttctcatggattcgcXactgcttagcattcaggaaactgaaagcg    |
| Streptomyces scabiei     | NC_013929_305358 | gggtgactacgaaaggttctctcgtgaagXgtcttggcgtgaggaaaccttgcactgac    |
| Streptomyces scabiei     | NC_013929_337331 | gttgggtagcggaaaggttctctcgtgggXtgattgatacgtgtgcattatggcagcag    |
| Streptomyces scabiei     | NC_013929_3561   | gacgggatttggcatgaattgtcacctcXcgcctgtagggaagccttgcatttgcg       |
| Streptomyces scabiei     | NC_013929_51321  | gatacctaactgttccggaactaccctgtXaacgccatcgtatcagctcctgctatc      |
| Streptosporangium roseum | NC_013595_126356 | ctgtgggtaacagaacgtcataatccgagXcccacagtaggcgatgattagcgaagttg    |
| Streptosporangium roseum | NC_013595_145381 | gtgactaatggagcgtatcagccgggcagXagttagcgaattatctgtagtgaacttc     |
| Streptosporangium roseum | NC_013595_212252 | gttgatcactgacagatcagacttattgXgccacagaacaaatgattgacgctgtccc     |
| Streptosporangium roseum | NC_013595_24177  | ccggggaagattcagcgaaggttatcaXggatgactctctgagcattggtcatatgc      |
| Streptosporangium roseum | NC_013595_255080 | cgcattatgcaacacatgaccgctgaagggXatagagatgcttgcattggcactttgg     |
| Streptosporangium roseum | NC_013595_2578   | gtgtcatggactccatttcgcatagccgtXtccctgacttccggtaaccggtcattcg     |
| Streptosporangium roseum | NC_013595_266306 | gtgacggtatggcgtcacatcgtatgaagXatactccttgccttctgacagcagatactc   |
| Streptosporangium roseum | NC_013595_312508 | cgaagagatcggaagcgtcaagggttgtXgggagatagcggctggtctcagttetaag     |
| Streptosporangium roseum | NC_013595_319356 | gtcgaagtcgactggtacacccaaagctXgctcccacgatgtatfaaaccttcttcc      |
| Streptosporangium roseum | NC_013595_330391 | ctgtgattccgttggatcgggatccgatgXtccgttggctcagcgtactaatctgaac     |
| Streptosporangium roseum | NC_013595_45027  | ccaaacctcagtttctccagatcggcgtXatcacccagataagtcactctgacactag     |
| Streptosporangium roseum | NC_013595_83926  | gccgttccctgttcttagccgttctacctgXgaaggtgctgtgctgctatccgatattc    |
| Sulfuricurvum kujiense   | NC_014762_20823  | gatctgttctcattgctgatgtttgccXacgatcgtccgccttftgagatcaattc       |
| Sulfuricurvum kujiense   | NC_014762_325    | gatcgatttaaaggctcggaggagcattXaataagttggcgtcgtaggcatcattcag     |
| Sulfuricurvum kujiense   | NC_014762_43314  | ggagaattcgtgtgaagcgtgcaatcagcXtagcgtggcttccgaacaaactgaagatg    |
| Sulfuricurvum kujiense   | NC_014762_4369   | ccgcttccgcacataccgaagtccaccXaaagagcggtagcattataggcggctgac      |

|                              |                  |                                                               |
|------------------------------|------------------|---------------------------------------------------------------|
| Sulfuricurvum kujiense       | NC_014762_47266  | cgccgttcattgcccaatcatagattaatXcttcgctgatacaaacgcgcatacttc     |
| Sulfuricurvum kujiense       | NC_014762_51617  | gttgatgatccttgctgcagctgttcacXctgcttgaatccgagtgccgatgatg       |
| Sulfuricurvum kujiense       | NC_014762_56961  | gattatctacggatccagttgatcggcXtccaaccgattgatgcaaaftgagcc        |
| Sulfuricurvum kujiense       | NC_014762_67395  | ctcattcggcactagcggattgactttatcXaacgcaacctccaaagctgggcaaaagg   |
| Sulfuricurvum kujiense       | NC_014762_77075  | caatacgggccgatggttgaggaatcgcXtaagaatgctgaattcgccttagcggccg    |
| Sulfuricurvum kujiense       | NC_014762_85682  | gtccgatgatcgttcgagttcatcctgagXctattgcgagagagatgccagctctatc    |
| Sulfurimonas denitrificans   | NC_007575_1284   | gcaatcaatgctcaaacatcagtaactgggXgctgctgataatcgggcacgttatgctcg  |
| Sulfurimonas denitrificans   | NC_007575_14836  | ctcttgataaagtcaataaagcggactgXaagagtggtctgacgacaggcctctgtag    |
| Sulfurimonas denitrificans   | NC_007575_31007  | ctgtattgggttatgatcctgggttgXgacctggcgcgatgactatggttagcg        |
| Sulfurimonas denitrificans   | NC_007575_43619  | cgatctctgttggaattcaggcaatcgcXaatccacgctatggtggaattgctcctgc    |
| Sulfurimonas denitrificans   | NC_007575_56297  | ggccatcaaggctggagtagtaatatgacXtgcgtaagctgcctcatagcacgagcag    |
| Sulfurimonas denitrificans   | NC_007575_57054  | gcatctcgtggagtggtataattactttXicagttctctcgccctcgcgatgagagg     |
| Sulfurimonas denitrificans   | NC_007575_59760  | catgtatgccatccagccattgaaacgXctctctatccacgccagtagctcgtttc      |
| Sulfurimonas denitrificans   | NC_007575_60769  | ctcgactatcacgcttacataaagctctcXcattgagtggtcagagcgtgtagtactgg   |
| Sulfurimonas denitrificans   | NC_007575_68708  | ccacctagcgcactaaagaactggcgatacXatccaagcagctaacgctccactaatagc  |
| Sulfurimonas denitrificans   | NC_007575_7663   | cctcttagcctcaataagagccatataatgXtaccataagctgcaattgtaagggcggcac |
| Sulfurospirillum deleyianum  | NC_013512_18396  | ctctgtaatgatggcaagctgttagcggXtagagcgccttatgataatgatgcacgtg    |
| Sulfurospirillum deleyianum  | NC_013512_28457  | gcagcgtaggtgtttcatcccattcatgXgtatctagacgaatgagcgtcccctgag     |
| Sulfurospirillum deleyianum  | NC_013512_34851  | ctcgtcatctcttacctgaaatcatggtXaaagccgtattctggtgcaagctcacc      |
| Sulfurospirillum deleyianum  | NC_013512_39250  | cctgcctcactgtcgttactcagcacaXgcatctaagagcgtaaataatcctcatac     |
| Sulfurospirillum deleyianum  | NC_013512_49898  | gagttactcggcccagcttcagaggtatXcccaagatgtaccaatcgcacagccttag    |
| Sulfurospirillum deleyianum  | NC_013512_56291  | gtgacagctatggtgatgctctccaactcXattcgacagttgagctggcatgattgc     |
| Sulfurospirillum deleyianum  | NC_013512_76727  | caccgtctctacacgatgcgagcgggtgXaacacactgctgatggaacatacagtcg     |
| Sulfurovum sp.               | NC_009663_171    | gagggtcaggctgaacgtttgataggattXcttctgacctctaccaatttcatgagc     |
| Sulfurovum sp.               | NC_009663_23284  | gtcgaactcctgtgccgtattctgatacXttggccaggtgtgcttctctctgcaag      |
| Sulfurovum sp.               | NC_009663_27267  | gataccgtccatttattatcggttccatXgatgcctcatagacggcggaaatagggc     |
| Sulfurovum sp.               | NC_009663_34483  | ccaacaattctcggagtggtcgacaagaXatatccttactcggcagcggcatatcg      |
| Sulfurovum sp.               | NC_009663_47526  | ccatgaccatgtagtaatatcctggccaXggtagaactggtcgggtcactctgatcg     |
| Sulfurovum sp.               | NC_009663_56201  | ctgcgtaatgccatcagaataaacctttgcXatactccgaatggcatcggctcattctc   |
| Sulfurovum sp.               | NC_009663_60440  | caatgaactgtcaccggttcgatcacacXtagctatccacttttgcgtctgctgtcg     |
| Sulfurovum sp.               | NC_009663_69649  | cgatgaccaaagaaccagcataagtgtcaXtcatcggcctgaggagaacctgctatgg    |
| Sulfurovum sp.               | NC_009663_8545   | gatgaagtgtgctggaggctgccaaggggXgagcagatccatctgttcatgatctggag   |
| Symbiobacterium thermophilum | NC_006177_10256  | gatgcgcaagatcagagatcctctcttXtgggcaagccttgcaaatcggaggtgtc      |
| Symbiobacterium thermophilum | NC_006177_118866 | gtatgatctagtaagcccctccactccgXggagtttggataacttcccgcgctctg      |
| Symbiobacterium thermophilum | NC_006177_31405  | cgaggggaggcgtgatcggtatggcccaggcXaacatccataataaacagcatagggaatg |
| Symbiobacterium thermophilum | NC_006177_40033  | gaaagagttctcaagtcgatggcacaggcXcttcggctacttcatcgtctgcccacac    |
| Symbiobacterium thermophilum | NC_006177_42235  | cgctggcgaatggaagcccattcgttcggXcgtatgatcaacataggaactgactatc    |
| Symbiobacterium thermophilum | NC_006177_80171  | cgatcaatcagaagacctacaccatacXaacctggtgacgtgtgaaccggcacctg      |
| Symbiobacterium thermophilum | NC_006177_96929  | cagccttactaaactgtctcgcgctctcgXcaactcggcctgcatggtgaaatagag     |
| Synechococcus sp.            | NC_007775_25308  | gctgctctctctacgaaagaggaatggXtaaacgttctgttcgcaagggacgaagt      |

|                              |                  |                                                              |
|------------------------------|------------------|--------------------------------------------------------------|
| Synechococcus sp.            | NC_007775_73376  | ccctgaaactcgtggtgatcatatcggctXctgtagtcaaatattgccgatccacatg   |
| Synechococcus sp.            | NC_007775_84149  | gcaatatgtcggcattatggcatggagttXtccaacaggtcggttcaaggagcgtattgc |
| Synechococcus sp.            | NC_007775_87535  | ctgctgaagaataagcccaaggtattctcgXgcagcaagagttatctcacgctcaagctg |
| Synechococcus sp.            | NC_007775_9659   | cgaagagcccgtctctatagaacaggtggXaggcagcatggcagctgtgtaagaaggtcg |
| Syntrophobacter fumaroxidans | NC_008554_118488 | cgattccggatgacaaccaggctcttggXagctgccgtgctctactctactctctg     |
| Syntrophobacter fumaroxidans | NC_008554_138071 | cgctccgtcccatcagtttcacgaaatgtaXcaacgcagctccagggtgattctactg   |
| Syntrophobacter fumaroxidans | NC_008554_147134 | gctttgatgaaggcaatctgttccggttcXtaggcgtagcatcaataaggacttgattcc |
| Syntrophobacter fumaroxidans | NC_008554_156545 | ggtcagtaatcctcttcatgggtggcgXtggaaagcaagaggtgctttgacgtatg     |
| Syntrophobacter fumaroxidans | NC_008554_20859  | catattcaggtgtccgcggcacatccatXctgtgctagctcttccgggaacaggtgac   |
| Syntrophobacter fumaroxidans | NC_008554_28848  | caaggaaagtgaacctccgaacgaagaaacXtagcatagtggaacaatgtctctctgg   |
| Syntrophobacter fumaroxidans | NC_008554_332    | cggtcaaatcccagttctcaatgactXctgacggagatgttccgggttccacttc      |
| Syntrophobacter fumaroxidans | NC_008554_42300  | cttggcaggtgtgtataatcttgaacgcaXgtggtttaccacgcccgctcacattacg   |
| Syntrophobacter fumaroxidans | NC_008554_68152  | cttcgcttcaattgatgtcaatgtggcXcaccacgtgaacaccactctgttctagtc    |
| Syntrophobacter fumaroxidans | NC_008554_99073  | gctgatggaagttgttagttctgctccatXtccgaatgcctccgaatgctcagacctag  |
| Syntrophomonas wolfei        | NC_008346_14506  | gcttaccagctaaactacagctttagaagcXctgacgggtgtagatcatctgatgccccg |
| Syntrophomonas wolfei        | NC_008346_264    | gagtgatacgggtaagaccgggagtaagXttaacctcgtgaggacgacgaattggtgg   |
| Syntrophomonas wolfei        | NC_008346_49401  | cgttatgggctcgaagtaacatgatcggcXccgggcaataatctattgacctttcaac   |
| Syntrophomonas wolfei        | NC_008346_5320   | gccgtacctttgtaccatccgttatgcagXccatggatgtagaacatataactggagg   |
| Syntrophomonas wolfei        | NC_008346_55525  | gcttgcctgggcttcccgttatctggagXgagcttcaaatatattccctggcgag      |
| Syntrophomonas wolfei        | NC_008346_72057  | ctcagattaccggctataacggatgatacXgcttcaaagctcggcgatagattcagag   |
| Syntrophomonas wolfei        | NC_008346_81449  | ctatgtcttccactgggtaccggatgatXtgcagggtatccaattggataggggtg     |
| Syntrophomonas wolfei        | NC_008346_86420  | ggtgtgcgcaaatcgccttcgacacagaaaXaaagggctgttaaatcctcgttctgcac  |
| Syntrophomonas wolfei        | NC_008346_92108  | ggattccgggataaacctcgagaagctcaXagtgtggatcagattgtaaggcagctcg   |
| Syntrophomonas wolfei        | NC_008346_9547   | gttatttatgttgggtgatgtcgggtatXagtaccattgtggccgctgacagcggagag  |
| Syntrophomonas wolfei        | NC_008346_97762  | cttccgctccaacaagagctgtctatcXacattgattccctctcgttatctcggcc     |
| Syntrophothermus lipocalidus | NC_014220_12867  | gttaccacttatcaggtgttcttctcXagaaacggacctctgcctctgattaccacg    |
| Syntrophothermus lipocalidus | NC_014220_16585  | gttattcttaaccgttaataggagtaggXtgtcgggctgattccagatcgggtgac     |
| Syntrophothermus lipocalidus | NC_014220_25411  | ctctaataactcaactacgggcgaacaaaXaggctccttaaggccttggggccgtc     |
| Syntrophothermus lipocalidus | NC_014220_41725  | ctctaaatcgagattctccctagccttagXgctgagtgccgggtctgtgtcatctgtgg  |
| Syntrophothermus lipocalidus | NC_014220_56579  | gctttccattaatcgaagtaattgctXcgcctcgttctgtagcagcagcagacaac     |
| Syntrophothermus lipocalidus | NC_014220_70323  | gaggcattcggccattgatccctatcccXatacatgttcagttggtgttctccac      |
| Syntrophothermus lipocalidus | NC_014220_75175  | ctctcgtttgcctttagtaacaacgtcagXagggctgggaggtattgattatcgcctcg  |
| Syntrophothermus lipocalidus | NC_014220_79985  | gaagattcaactccctctgcatcgtcaXccaccgctcgggtattacgttaccg        |
| Syntrophothermus lipocalidus | NC_014220_8457   | cggaccagttttccatccggttagccgcXgtgatgtggtcatcaaacgatacagg      |
| Syntrophus aciditrophicus    | NC_007759_31277  | ctcagtgacaatgcgttccgcaatgaatgcXaaactgtctcccagcttgcagagcggag  |
| Syntrophus aciditrophicus    | NC_007759_34596  | ccctgtgggtacgagatcttggccacctXaataagatctgttctcgcattgacatcag   |
| Syntrophus aciditrophicus    | NC_007759_38698  | ggaagtcccgtccttgggtgacgtaattXccgggtgctagttctgaagatagacaac    |
| Syntrophus aciditrophicus    | NC_007759_44895  | gctattgaaggaccgacataaacacgatgXcttctcaggacagtaaccgccgactccg   |
| Syntrophus aciditrophicus    | NC_007759_50076  | ggctgtaaacctgaaatccttccagcggcXgtcagaacagattaccgatcacctctgc   |
| Syntrophus aciditrophicus    | NC_007759_55508  | cctctgtacatcattaccgactcatctcaXcggatcaggtatgacaataacgcggcag   |

|                                   |                  |                                                              |
|-----------------------------------|------------------|--------------------------------------------------------------|
| Syntrophus aciditrophicus         | NC_007759_93890  | cggtgttcgatcgtgccgtaacccggcXcattgaagaactgcgaattcgcactatgac   |
| Tepidanaerobacter acetatoxydans   | NC_019954_12695  | ctttatagaatcgctactgacaactacggXgctactaatccgccagtgcttcacggctg  |
| Tepidanaerobacter acetatoxydans   | NC_019954_28515  | cgcatctgcctgaatccttcgaaacaccXtccttattcgggtggcggaggtattc      |
| Tepidanaerobacter acetatoxydans   | NC_019954_31935  | gaccttgggtgcagtcctctgccttattXggctgccgtagtaacggaaagtattgaaag  |
| Tepidanaerobacter acetatoxydans   | NC_019954_329    | ggcggtttatgtaatgccggaacgatggcaXcctgtcaggcttaattatcacaggtggcg |
| Tepidanaerobacter acetatoxydans   | NC_019954_50195  | ggccgaggtactcgcctaataataccgggtXttgtcctgcgccttcaacttactactc   |
| Tepidanaerobacter acetatoxydans   | NC_019954_5210   | cttgtagtgaggaggctattattaccatXtatggatggcgtgacaaccaccagcgacgg  |
| Tepidanaerobacter acetatoxydans   | NC_019954_54125  | cacgataatctctgacatcccgtgataXtatcgatgaaccttgccttcgcaattgc     |
| Tepidanaerobacter acetatoxydans   | NC_019954_72176  | caccgcttatatacatatgctctgtgctXaggctgcatcattacctctacagtgccg    |
| Tepidanaerobacter acetatoxydans   | NC_019954_76623  | ctgctgcgatttagctcctgggtccgccXtccgattttctcagccaggtaactaac     |
| Tepidanaerobacter acetatoxydans   | NC_019954_9177   | ggataagctgcatccagaccgtttatatggXactttaaggactgaacttgcagtgaccg  |
| Teredinibacter turnerae           | NC_012997_107308 | gatcgtgfcggcgagccatcatgattgtXcaactatccccttattggcagcatggac    |
| Teredinibacter turnerae           | NC_012997_125574 | cttaatcgagcctgcctgacaacctcgcXagataacagatcaatgactgaagtaatcgg  |
| Teredinibacter turnerae           | NC_012997_163645 | gtccactcaagcttgcaaggcactgggctcXaacaatgctgctcaattgctggtatc    |
| Teredinibacter turnerae           | NC_012997_173047 | gcatgcttatcggcgttgcagtaaatcXatcaagcgtgctgctgatgtaactg        |
| Teredinibacter turnerae           | NC_012997_49573  | gtaccgatatgccgccacctattgtaacXtatttcgatcttgggatgccgttaaac     |
| Teredinibacter turnerae           | NC_012997_74305  | cgcgcaaatgtgcttatactggcggaXccaataatttagtgggcaacttcatccc      |
| Teredinibacter turnerae           | NC_012997_80133  | cggcaagaatattggcagacgtgctgXactgctgctgacggatgatgagctattgg     |
| Teredinibacter turnerae           | NC_012997_89342  | gctgttcctgctgttctgcttggttgtaXctttcggctgggttacggcggaacatcg    |
| Teredinibacter turnerae           | NC_012997_96     | gtgaaatcgtgtagtgcaaccgacggacXtgaacggaatccttgggagtgccgctg     |
| Thauera sp.                       | NC_011662_1      | cgcaattagaatgctgctttcagcccaXtttcccagccttggataagctgcctc       |
| Thauera sp.                       | NC_011662_119949 | cccgttccgattatcattgatccgatgggXagacatgaagctgctagattcacggctg   |
| Thauera sp.                       | NC_011662_138993 | gagcgcttctgatgacgtccattagcgaXagaagaagtagctcaccttatgctggaatc  |
| Thauera sp.                       | NC_011662_18339  | gcgtaggtaacaatcagcatctctgatctXtggcagaagctgctggaccgacagatgg   |
| Thauera sp.                       | NC_011662_4739   | cggtaagtagccctcaacgacctgtagaXtatgctgatggttgcgatattgcagctacc  |
| Thauera sp.                       | NC_011662_63951  | ggcgagcgtacgtagtcttctgccattcXtccgagcggatcgatgctcttcagacg     |
| Thauera sp.                       | NC_011662_818    | caacattggtctctgccaattactcaaXgatcgccacttgcaccgctgagcaccgg     |
| Thermanaerovibrio acidaminovorans | NC_013522_11901  | cccgttccagacctctcaacaccttgaXattgcttcagatgtaaggaagctctccg     |
| Thermanaerovibrio acidaminovorans | NC_013522_14361  | catcttgcaccgttccatataacacXatattgataaggttgcctccatgaccgctc     |
| Thermanaerovibrio acidaminovorans | NC_013522_23548  | gttctgcttgcagtggtgatcagatggaXcaggatagggagggtcaaatccgacatctc  |
| Thermanaerovibrio acidaminovorans | NC_013522_25182  | cctgtcggttacggaatacagataatacaXtaaacaggatctcttggacagatgacgc   |
| Thermanaerovibrio acidaminovorans | NC_013522_27180  | cggagattcggagcctggtggtgacgccaXtcaacaccttgggttcaagttaacgac    |
| Thermanaerovibrio acidaminovorans | NC_013522_29339  | cgacgcctatcctcctctgctatctgataXcttgaattcgtatcccgttgaaccgc     |
| Thermanaerovibrio acidaminovorans | NC_013522_35396  | ctctcaagggtcaagaaggccatgctggcXacagcaagatctagggcaagatccatcc   |
| Thermanaerovibrio acidaminovorans | NC_013522_42013  | gaaacctcctggtgattcattacagcXcgggaagcgtctcaagttatgctcaaccg     |
| Thermanaerovibrio acidaminovorans | NC_013522_4676   | ggtgaccgttgagataccaagtacatggXcgtgaaccttattctaccatgaacgggtg   |
| Thermanaerovibrio acidaminovorans | NC_013522_51578  | cgctccctctgaggttccagatcacgtXtctccagttcgggtacaactcatatggg     |

|                                   |                 |                                                                 |
|-----------------------------------|-----------------|-----------------------------------------------------------------|
| Thermanaerovibrio acidaminovorans | NC_013522_52002 | gtattgtatgatgcctcatcctcaaatgccXccgtgatc gagacacgcttgacacgatggcg |
| Thermanaerovibrio acidaminovorans | NC_013522_56524 | ggatcgcctacaacattgggatgattcctXctgtgcggaacgtccaccggctttac        |
| Thermanaerovibrio acidaminovorans | NC_013522_9952  | ggatcgttacctcctgtttaaattgccctgXgccggttcctatgacggatcctcatgtg     |
| Thermincola potens                | NC_014152_21825 | ctcaattcagaaggtcgtttgaccgtggatXgacaagccttcccgaagttaccgcttac     |
| Thermincola potens                | NC_014152_46546 | cgtagcaggtatgaattagcgcagaatgaaXgttctacagcggatggactttggcgacggg   |
| Thermincola potens                | NC_014152_52063 | ctattataccggaacacgccgaagtagccaXagccgtagcccgtttaatgaactcatcc     |
| Thermincola potens                | NC_014152_69722 | gactttccagggaattcacagtctctttgXatacaggaaaccttctgaccgcaattacgg    |
| Thermincola potens                | NC_014152_80700 | gtatttctatcctgccgagcacttctcgXcatcccgcttccagcggtaagcctgaac       |
| Thermincola potens                | NC_014152_86254 | ctgccaagccctccgccactttgtccacXcttactcgggttatcaaaattaccgttcc      |
| Thermoanaerobacter sp.            | NC_014538_54200 | gggtgatatagtagccacattctctgaXcatacccaaatgttactacgacctctggc       |
| Thermoanaerobacter sp.            | NC_014538_54367 | ccacctcgtccaaggggaagataggtgcXagagcattaggtgttctcatcgtgtgtc       |
| Thermoanaerobacter sp.            | NC_014538_6127  | ggccacttggatgtttatgctgcactggcXcctcctaagtgtatfaactcccattcgc      |
| Thermodesulfatator indicus        | NC_015681_16075 | ccgctccgggtatttactaccttggcttctaXctttaagaaccagacgataggattgggg    |
| Thermodesulfatator indicus        | NC_015681_357   | ccctactgtcagcgagcagcactttaaXtgaaggttcttttagcctctaccacctg        |
| Thermodesulfatator indicus        | NC_015681_44831 | gatattctctgtttctggctcagcatcttXgctcctggccaatgattctgaaggtcgg      |
| Thermodesulfatator indicus        | NC_015681_51666 | caagggcgtttacgtggtcagggcggtaaXttgaccagacattatgatggcttatgaag     |
| Thermodesulfatator indicus        | NC_015681_5311  | cggtgtattggatgtgcttgaagtctgggtXcctaactacgtaatcgtagtgaacaacg     |
| Thermodesulfatator indicus        | NC_015681_64819 | cgttctcactccgttctgggtattgatcXtctgcatagtgatttctagcttggcgaag      |
| Thermodesulfatator indicus        | NC_015681_67678 | gaagactgtctgacctgatagagttcattXgtcgcagggatattaccaagcggacaccg     |
| Thermodesulfatator indicus        | NC_015681_77307 | ctggtgaccgccaactatattgaaagXcgtactgctggtggcggccaactatattg        |
| Thermodesulfobium narugense       | NC_015499_12057 | catgctgttggtaggcaaccaatggatgcXatcaggcactatggcaagaggattgaggc     |
| Thermodesulfobium narugense       | NC_015499_14241 | gtgtctcactgtctacaatttctcttXaggctcagattgcccgtgatagtgctcg         |
| Thermodesulfobium narugense       | NC_015499_17260 | ctgttattgcagttagggtgacgatgcgcXgagtgcttctatcaatcctggaagtg        |
| Thermodesulfobium narugense       | NC_015499_2009  | ggccaattcaatgccagttaatgaggtgXatgactgccctgaatgtgcttctgtgacg      |
| Thermodesulfobium narugense       | NC_015499_5156  | cgtcgcataaccaatgaccaatcccttgXgggtgccaagctgtcgccttaaatgttc       |
| Thermodesulfobium narugense       | NC_015499_60904 | cagcccatgaaacaactatcctctgtccXgcaaccttcaagccgaagaagtaggc         |
| Thermodesulfobium narugense       | NC_015499_6140  | ctcaggcagtagcaaatgcgatagagacXccaccttgacagcgttattgttctaac        |
| Thermodesulfovibrio yellowstonii  | NC_011296_13161 | gaacctctgccctgtttaccctgtaggaaXatcattccgaaccctcaatgggtgtgag      |
| Thermodesulfovibrio yellowstonii  | NC_011296_15369 | gtggtgcagttacctgctgggtattgttaXcaaatggcttcagaccacttatcatg        |
| Thermodesulfovibrio yellowstonii  | NC_011296_20388 | cacatactcactcgttcatagaggctaXcttctctataactggcagcgggtacag         |
| Thermodesulfovibrio yellowstonii  | NC_011296_30785 | cctatggtgaggctctggttaagatattcXgtttcgggtgaaatggtgcaacgagacgtg    |
| Thermodesulfovibrio yellowstonii  | NC_011296_50096 | ggagttgccattgaaggtgagttcttgcXggcgagggtcagagcgtgatgaatcaatc      |
| Thermodesulfovibrio yellowstonii  | NC_011296_59520 | ggcttcgctcaggatgacctccaggtaXcctcttctgattaaaggagacgaccttc        |
| Thermodesulfovibrio yellowstonii  | NC_011296_66623 | caggacctgacttctctatctgtactggaaXccttctcctcgaagcatgaagtactctg     |
| Thermodesulfovibrio yellowstonii  | NC_011296_8181  | gtaagctgttctctgtgtgtaatttctXgttgcctgctgacgagggtctgttactgtg      |
| Thermomicrobium roseum            | NC_011959_19564 | gctcatagtagctacctgtctcgttgggtXaccggactcttggctactgttctctgctc     |
| Thermomicrobium roseum            | NC_011959_30372 | gtgacgaagcaatctatctctatgtgcatXtccagcaggagcgtcgttggcgatacg       |
| Thermomicrobium roseum            | NC_011959_445   | gggtc gatcccgaagatacgaacaagaatXgccgaagtgcacaacagcgtcgttgggtc    |



|                                       |                 |                                                              |
|---------------------------------------|-----------------|--------------------------------------------------------------|
| <i>Thermomicrobium roseum</i>         | NC_011959_50095 | gtcttgacatccacgatcctcttctgtagtXccgggattcgtcactcatccaaggatcg  |
| <i>Thermomicrobium roseum</i>         | NC_011959_56100 | ggatcgcagctcagatgatgacgaccgatXccggaccaacaagtcattgatgggtgctg  |
| <i>Thermomicrobium roseum</i>         | NC_011959_62545 | gtcatagggttaaggagaggatgatactgtaXggaccaatccttcagtgctgctggccc  |
| <i>Thermus</i> sp.                    | NC_017278_15255 | cttgcctcctcaggaacaaccaagggtgXtccaacagttctgtactcgcactagctg    |
| <i>Thermus</i> sp.                    | NC_017278_31798 | ctgctggagagttgagatggcttgctcXgaggtagcatcgtaacatcaacgcatcg     |
| <i>Thermus</i> sp.                    | NC_017278_47866 | gcgcataccgggtgctcatcgctaaacctggXctgatctgaatagaatgggatggacag  |
| <i>Thioalkalimicrobium aerophilum</i> | CP_007030_18327 | cgttgatgcatcgccgtaaggcttgaccXatcctgctcccaaccaaaattggtgatgctg |
| <i>Thioalkalimicrobium aerophilum</i> | CP_007030_21477 | gtaacgtgatcacgcggttaatcagccattXtgcatttaacggaagatgacgagttgccc |
| <i>Thioalkalimicrobium aerophilum</i> | CP_007030_30243 | gctctgaacgggtgaatttaggcacagggcXcggcgttgggaaattaatgcaatcatctg |
| <i>Thioalkalimicrobium aerophilum</i> | CP_007030_33401 | gcagcattaggtgaccaagactttgatcgXgttaacgaactccaagctctgtgcccgtg  |
| <i>Thioalkalimicrobium aerophilum</i> | CP_007030_52101 | cgaaattggtttaacctttgctgcaccaacXtggatgtagatgctgctccaactgcaagc |
| <i>Thioalkalimicrobium aerophilum</i> | CP_007030_59121 | ctgtttgggttccatcgccaagcctgcccXctattaagcgtgatcgccaataacgacc   |
| <i>Thioalkalimicrobium aerophilum</i> | CP_007030_6848  | cacgagcgttagtaatacaattaatgcccXtggatgatgctgcttggtaaccacaag    |
| <i>Thiobacillus denitrificans</i>     | NC_007404_11582 | gcgctcgcggcaccgttactgttcgcgaXaacgacttaaatcgtattgagactgttc    |
| <i>Thiobacillus denitrificans</i>     | NC_007404_13353 | ctgtatctcgaaggagaactcggagcaXggttctctacgaagaaggtgacagcgttac   |
| <i>Thiobacillus denitrificans</i>     | NC_007404_18085 | gaagttgtgtgcaattatccgggtgcttXcagcgtcgtaccagctcgtcatcacgtcag  |
| <i>Thiobacillus denitrificans</i>     | NC_007404_2090  | gcattatctgttctcctgctgcatccgggXatcgatgacgatggaagcagcagttgag   |
| <i>Thiobacillus denitrificans</i>     | NC_007404_24734 | gcgttatagatgattccgcaattctcggXggagattgagcggcatcggtgcaatggagc  |
| <i>Thiobacillus denitrificans</i>     | NC_007404_31486 | cagtgagcgcggttcacggatatagcactXatcctgtgatcgaccagctcagtgatc    |
| <i>Thiobacillus denitrificans</i>     | NC_007404_34716 | cgattcctccgaggtgcacggtaatacXggatacagctgttgttactgctgaagaac    |
| <i>Thiobacillus denitrificans</i>     | NC_007404_39880 | caaataagagttgacacatggaacgctggXtgaattcgtgcaactctgctggcggctgc  |
| <i>Thiobacillus denitrificans</i>     | NC_007404_55020 | gtcataacaagcgatgtagcgaatagaXtgttcccgggtaccgtaattcgcagaagg    |
| <i>Thiobacillus denitrificans</i>     | NC_007404_56878 | gagccgttgaacgattcttgatcttccaXatcaccgtatcgatcggaatacgaaggaac  |
| <i>Thiobacillus denitrificans</i>     | NC_007404_66143 | gctgcaagcactcgcctaatacctgataXaagcagatgcaacaactcgtcctcagctg   |
| <i>Thiobacillus denitrificans</i>     | NC_007404_78450 | gtgtattgacttctttagaacggctccXcggccatcgattcacgcttcttaggcgtg    |
| <i>Thiobacillus denitrificans</i>     | NC_007404_96807 | gaaagccctgtcgggttcaactgcttXtgctcaactggcatagatgcttgaacgg      |
| <i>Thiomicrospira crunogena</i>       | NC_007520_21310 | gcagtaaacgttggtaaccgctggttgaXtgggttagtcttcgctgtagaataacg     |
| <i>Thiomicrospira crunogena</i>       | NC_007520_25534 | gcgctgctgattatcgctgctgatgtggtgXttagccgaaatgatgtaaatcgaagcg   |
| <i>Thiomicrospira crunogena</i>       | NC_007520_29113 | cggfttatattggacgctacgtgaagacaXcggctgtcaccgatccgctaatacgaacc  |
| <i>Thiomicrospira crunogena</i>       | NC_007520_34151 | gtaaggattgccaactgacttggcggccgXggttccaagaatcaatacagcgtagctc   |
| <i>Thiomicrospira crunogena</i>       | NC_007520_44299 | catcgagactgatttgtgagtgcttXtggaaatcaatcccagcaggtcgcacgccc     |
| <i>Thiomicrospira crunogena</i>       | NC_007520_4576  | ctgtgcttccgagagtatacccgcgggaXcagtgaaacgcttgaacttatgaaag      |
| <i>Thiomicrospira crunogena</i>       | NC_007520_58452 | ggctcatgagtgagtacacttctacacggXtcgcttggcagctggtggttattggc     |
| <i>Thiomicrospira crunogena</i>       | NC_007520_62603 | ccttagaacccaatgccctgctcgaXagatttaacggcagcagctgttccgccc       |
| <i>Thiomicrospira crunogena</i>       | NC_007520_69678 | cggcttaccaccgattgctggataatcgXcaagcaggttctgccactctgaatag      |
| <i>Thiomicrospira crunogena</i>       | NC_007520_80904 | cagccattgccactcagcggcttcagctXtatatggttggcacaatgttccatcgcc    |
| <i>Thiomicrospira crunogena</i>       | NC_007520_8850  | gcttccagcgttccgtcattgattggtgXaaatacgcattcagcgtttagccggcatc   |
| <i>Thiomicrospira crunogena</i>       | NC_007520_95    | ggtgaagggtcaactgattgctggtgatXcggcaactgagcagcgtccttaaccttc    |
| <i>Thiomonas intermedia</i>           | NC_014153_20605 | ccaatttcttgatcgcattccctgctXagtgttccggaagacatcggggcatcg       |

|                            |                  |                                                              |
|----------------------------|------------------|--------------------------------------------------------------|
| Thiomonas intermedia       | NC_014153_53932  | ctcaaacctatcagatcacgaagctgattXtgggtcccaattcgatgaagccccagtag  |
| Thiomonas intermedia       | NC_014153_56217  | cggactgaagaacgacgtctactttctctXccaattatcgacggatgcatgttcgagg   |
| Thiomonas intermedia       | NC_014153_5915   | caggccaaggagtttgaacaaccatgcaXcagcggcaagaagatcgatttcatgttgc   |
| Thiomonas intermedia       | NC_014153_61824  | gtggctgcaatcagcgtgagcgttacgcaXtcgaattgacaaatagaagctgtcgcg    |
| Thiomonas intermedia       | NC_014153_69558  | cggaaggctattcttataataaacctagcXccggcgtctttatttggtagcaaggaag   |
| Thiomonas intermedia       | NC_014153_76     | cgatatggaagtgcagatccgtctcaagcXcaacgcgaatggcactctgttcatcaccag |
| Thiomonas intermedia       | NC_014153_86924  | cgtagcgcatagaagaagtatatcgaatXaccgcgcttctattggcctccagctcg     |
| Thiomonas intermedia       | NC_014153_97433  | ggtagaatcgatcattatgggaatgtgtaXcgttgttcagcgcgctggtaaccgcg     |
| Tolumonas auensis          | NC_012691_17809  | cggaacaatttcacacagaaggagctcgtXacctaatacagactggtagcatccac     |
| Tolumonas auensis          | NC_012691_32835  | gaaccgactggtatgcacatttgcgtccaXttagtgcgtgctgtgtttcgtcatctg    |
| Tolumonas auensis          | NC_012691_37548  | gtgccgagatgttctactcggccgggXcgcgagtgcttcttatttccggtttg        |
| Tolumonas auensis          | NC_012691_43761  | gcgtaaccactgaaaggtccgtaactgaXcactggcaatgattctgtctttcagtg     |
| Tolumonas auensis          | NC_012691_49     | gttctatcggtgctcgcacattactaXgtctgctcggccattgcaattgfatccg      |
| Tolumonas auensis          | NC_012691_49633  | ggtaataataacctgtcaccagagacaaaXcgtgtcactaaaggcggtagccgagac    |
| Tolumonas auensis          | NC_012691_6374   | caccattcagtagtcttcttctgtgcaaXaggtcactcgttgcgcaattgcagcgg     |
| Tolumonas auensis          | NC_012691_66529  | cacaagaattatcaagagcatcaattccagXgaccggatccatccaccctaccggtgtgg |
| Tolumonas auensis          | NC_012691_93446  | ggaggttcccgcagcgaatgtctggatgagXtctgatattgcagagataaaggaggtgc  |
| Treponema pallidum         | NC_021179_11167  | caecgcatcagccacttcttattgcttXgctcatcggatttccctatgctggcgaag    |
| Treponema pallidum         | NC_021179_130    | ggagcgtttgatgctcgcagagaatgggtXcactgaatatcaagcttctatgaac      |
| Treponema pallidum         | NC_021179_16625  | ctggataatcagctgttccgctcagttctXgtattgctttgtaaacacagcaccgctc   |
| Treponema pallidum         | NC_021179_37946  | gttgaggttcacaagagcgtatgtagtgcgcXtctattccttagatgaaagcggacc    |
| Treponema pallidum         | NC_021179_5041   | ctgcgtctataagatgctcgtggctcggXtagacttgaatggacagcagatgacgc     |
| Truepera radiovictrix      | NC_014221_102810 | ggftatagccgatgctccatcatcctcXgtagccctgatacagccttctgatgacac    |
| Truepera radiovictrix      | NC_014221_107937 | ccataacgcgccactttaccatagaggtctXgtttgaccattgcgtagtgcgttcaagt  |
| Truepera radiovictrix      | NC_014221_27303  | cgacaacttctgttctccagaacaaaggXcggctcgcgcgattataagtgaaggctg    |
| Truepera radiovictrix      | NC_014221_36906  | caaccctaaccgctacgctagggataggXcagataaaaggtaaacgtaacggctgctg   |
| Truepera radiovictrix      | NC_014221_42325  | ctaggttctgttgacacttfaacgagcgttaXcgtgagctcctcttgcgccacaaggc   |
| Truepera radiovictrix      | NC_014221_49145  | cgaacacgcccggccctgacggtaaagcgaXtaagtgaaactgttactgttctgctggc  |
| Truepera radiovictrix      | NC_014221_64763  | ccaggaatgttgatgggtatgggtgtaXgggcaaacgcaagcttgcctatcggatgc    |
| Truepera radiovictrix      | NC_014221_64887  | cagcgtatgcacttgttggtagacagccaXtctcgtgtgtaaccaacgctgaaaggcaag |
| Truepera radiovictrix      | NC_014221_71421  | gttgccacctctagttagagccttctgagXtcacgaccaagacgtaaaagtcgccagtag |
| Tsukamurella paurometabola | NC_014158_10190  | ccaaggcgacaataggtcgttccgaccgXtgcctctatctttacgggtcagaattgac   |
| Tsukamurella paurometabola | NC_014158_10604  | gggtcgtttgtactgagctaatctaacgcXactagtcattctcactgtgtgcgatcgc   |
| Tsukamurella paurometabola | NC_014158_117822 | cgattccactgacaatcgcacgggcttXctatgatcaaacggttccaggcgaagtc     |
| Tsukamurella paurometabola | NC_014158_125857 | gttctcgtgaaagtctgctgcttccaccgXatgctcatagtcttctccctgttctcgc   |
| Tsukamurella paurometabola | NC_014158_1293   | cgaacgggttgcgctgtttaccgtgggcXctgtacacagaatctaaatacaccggc     |
| Tsukamurella paurometabola | NC_014158_142773 | gaccaacatagctgattccgcatgtattXtaccaggtgatcatcggtagcaccctcc    |
| Tsukamurella paurometabola | NC_014158_21126  | ggaatcgttgaatagtagtgcctcgtXtaccgacgagtgctcctcttgacgcaatg     |
| Tsukamurella paurometabola | NC_014158_27417  | gaggcgtcgggtgtgattgtaagagatctXaatgccattcgtgcatcgggtcgtgctc   |
| Tsukamurella paurometabola | NC_014158_55376  | gatacttctgctgggtgagacatcctctXgactctccgcgcatggaataaatactc     |

|                            |                        |                                                               |
|----------------------------|------------------------|---------------------------------------------------------------|
| Tsukamurella paurometabola | NC_014158_81953        | gataattgtctatctgtggacttagcaccXccgaggagcacgtattcagacagttggc    |
| Tsukamurella paurometabola | NC_014158_8363         | cgtaacgtttatcttaatggccctcataaaXgggtggcgattgtgacctgcgtattggg   |
| Variovorax paradoxus       | NC_022247_103338       | gaaagtctgtgctgtatcgctgttccagcgXtcaattgatggatcgcttgaatacatcgc  |
| Variovorax paradoxus       | NC_022247_115324       | cttgaggatcgatacatgctgaacatcttXgggctatttctgctgatcagaccctgcg    |
| Variovorax paradoxus       | NC_022247_118998       | ccgatacataaacgcacaaatttcttgattXccgtctacgcgctgagcgcggcagacaacg |
| Variovorax paradoxus       | NC_022247_140715       | cgatcgcttgaacgtcttctgctgcagcgtaXgcctcgccatgattgaatcgcaataatg  |
| Variovorax paradoxus       | NC_022247_149988       | gttggcgaaacgcgcgacatggagcatacXgtatatactcttcccatatcagagagagc   |
| Variovorax paradoxus       | NC_022247_161957       | cgtaacaaacgcgctcgaatgttccgctgXgtgctacgtaacgtaacgacttgttcc     |
| Variovorax paradoxus       | NC_022247_19047        | gtfctcggaaactgctgatgcaccagaXtatagtggtgattcctcttaccacgcg       |
| Variovorax paradoxus       | NC_022247_46944        | gaagaattccgggtatctatctgcatcgcXccggaagtgcgctgatcacgaagtaac     |
| Variovorax paradoxus       | NC_022247_54950        | gggtactgacaaggcgtgcgccgttctaXaattgtaaggagcgttagcatcacc        |
| Variovorax paradoxus       | NC_022247_63847        | gtatcggtgatgtggtgacattgtgccXatcgctcttgttctcatgcccttcttc       |
| Variovorax paradoxus       | NC_022247_73116        | gtagacctgctatcgtcaacagtcgagggXgtcgtacaggatgcaagatacagacag     |
| Variovorax paradoxus       | NC_022247_78751        | ccactatccggagtcagcatcagctcatXattgccgactgatacactgcttcttgg      |
| Verminephrobacter eiseniae | NC_008786_111172       | ggttcgtatgtgttccgctacatcttXtttattgctacgctggcgcgtcatcag        |
| Verminephrobacter eiseniae | NC_008786_115233       | gctgcacctggtgatctgctgctgaXggcctatatacagcaatttctgttctac        |
| Verminephrobacter eiseniae | NC_008786_142520       | gacagggcaccaaaagaagcgtccagatcXtcatattcgttggcaacaacggtggttg    |
| Verminephrobacter eiseniae | NC_008786_169152       | ggccaagacgcgctgttgcgagagagattgXtatcacgacgataactgatgctgctgc    |
| Verminephrobacter eiseniae | NC_008786_184873       | gggacagaactcgaacaggttggcctattXgaaactgtcactcagcgaagaacttac     |
| Verminephrobacter eiseniae | NC_008786_18623        | ggaagaccgattaaccctgattgacagggXattctgctactccactggcgtcgacacg    |
| Verminephrobacter eiseniae | NC_008786_40830        | ctgcgtcgagatgagaattgcaataatcXaccagcggagcaggttgcgtgtaattgc     |
| Verminephrobacter eiseniae | NC_008786_72744        | gactgttagaatgttcttcttccatXtgtttgacgcgccatttggcgaacgggc        |
| Vibrio alginolyticus       | NC_022349_16876        | gacaagcaggttacgttagcgaatcgactaXtggctaaccgacgattgatattagtgatg  |
| Vibrio alginolyticus       | NC_022349_17025        | ctggcgcacgatttatagcccatctaataXcgtggttggaaaccgtcaagattgcttg    |
| Vibrio alginolyticus       | NC_022349_25604        | cgttatctctatggtgtgtactaccgtcXaaagctcgactatcgtcagacaagcgagc    |
| Vibrio alginolyticus       | NC_022349_29736        | ctttgctgcgtcgtgtaactggttagaaXaagttacttaattcctaaccgtccggaag    |
| Vibrio alginolyticus       | NC_022349_38206        | ggatgagaagcactcagctttgatgtacaXccaatattctccaagccaagctcaggc     |
| Vibrio alginolyticus       | NC_022349_4857         | cgaacctcgtttattcgcggctgatttXggagcaggtcgtcttctatgagacgaag      |
| Vibrio alginolyticus       | NC_022349_892          | cgtaacgcttcttattggcgttaagttagaXtgttctccattgtgattgacggcctac    |
| Vibrio cholerae            | NZ_AKGH01000001_100970 | gctagtaccgactgatggtcatgccttXatagttcatgaaccgaactgcatcggcgcg    |
| Vibrio cholerae            | NZ_AKGH01000001_22638  | cgggagccagcagcaagataataactcXtaactctcgtcttatgacctgatcgcac      |
| Vibrio cholerae            | NZ_AKGH01000001_33062  | gcagctccaagagcttaacttggtagttXtctcgcacgattatgctgatttcgaccc     |
| Vibrio cholerae            | NZ_AKGH01000001_37392  | cgttatccgtatggtgagtggaatgatgccXccgggtaaatcattcttctgacgcgc     |
| Vibrio cholerae            | NZ_AKGH01000001_42169  | ggtctatcgatcgcgactagccagaagataXtgaccatttgaagctgaccaccaagatg   |
| Vibrio cholerae            | NZ_AKGH01000001_54591  | gttgaaagcgtgttctctgctcgtcXagtgtaccatattctgaccacaactgg         |
| Vibrio cholerae            | NZ_AKGH01000001_67434  | gcggaatattaattggcttaggctcataagXtcgctgctgttctggtttaccgaactgcg  |
| Vibrio cholerae            | NZ_AKGH01000001_7574   | gtcagttgacctgtgctcactcatgggtXggaacaatcgaacataagctgccactgg     |
| Vibrio parahaemolyticus    | NC_004603_108752       | gtcaacaacggatgaaggtgtaacgctcXggcgtaatcttatcaagtaggtcggctc     |
| Vibrio parahaemolyticus    | NC_004603_13345        | cgactgccttgcgtaacgccactcaatagaXtaggtatctgccaatattgagcacag     |

|                            |                  |                                                                |
|----------------------------|------------------|----------------------------------------------------------------|
| Vibrio parahaemolyticus    | NC_004603_21789  | cctttaagtgcttagttcctaaactgaaaXaggttcgcttgaagctcactccctcattcg   |
| Vibrio parahaemolyticus    | NC_004603_37879  | gaagcggtagcttctatgtggataggtaccXatggcagagcgattagctccaagaataag   |
| Vibrio parahaemolyticus    | NC_004603_45435  | gtcaataatgccgtagagtgccggagatctaXgaagaagtgattccggtagcatgctgtg   |
| Vibrio parahaemolyticus    | NC_004603_483    | ccgccaacaccgcatctggtgtgtagctgtXgtgattaccgaaatcattcatcaatcacag  |
| Vibrio parahaemolyticus    | NC_004603_50176  | gcttcacagcctgtagcagtagaaactccgXgctaccatcgaacaacagctccgctaacg   |
| Vibrio parahaemolyticus    | NC_004603_57983  | gcactttcgatcagagattcagcactgttXacgttcactttgccgaatgaggctccactc   |
| Vibrio parahaemolyticus    | NC_004603_64416  | ggcctttacttccaggattgagcagatgtXctttaactgtccctctacgccgactttgc    |
| Vibrio parahaemolyticus    | NC_004603_70100  | caagctgatgaccgtgacatggcaccctXggaattggatgatgcagggtttgtagcgcg    |
| Vibrio parahaemolyticus    | NC_004603_7215   | gacttagcctccgaactctattctcgaaXtatgatcactacgctctgatgctcaggcg     |
| Vibrio parahaemolyticus    | NC_004603_76779  | gttgaagaatcaaaactcgtcaaatccaacgXttctcgtccactgactgaaatgccgctc   |
| Vibrio parahaemolyticus    | NC_004603_85752  | gtaagagtattctggtgcaattcagctgtXgtatagcctatcggcattacgctctgc      |
| Waddlia chondrophila       | NC_014225_13171  | caactctgattgaggaggattcatgaccaXttgccgtgatcagagaacgcgaatgccgg    |
| Waddlia chondrophila       | NC_014225_23079  | gctgattggctccttctccaacgtagaXtttcttgaactgctcctatccgctcag        |
| Waddlia chondrophila       | NC_014225_26955  | gtatgctggatccgcttgcataggcagttccXgttgaacaaatggtggaagcgtctctgc   |
| Waddlia chondrophila       | NC_014225_30409  | cgcatgtgtgcaatggccagcccaatggtXitgttcaactcgaatagatcctgtgtc      |
| Waddlia chondrophila       | NC_014225_48501  | gctgcgctaattatcctgtgcatatctXaccatttgagagataagccttgcctg         |
| Waddlia chondrophila       | NC_014225_52245  | gtttccgaataagattggcggaggaggcXaacaaggcgttgcctttgtagcgttaac      |
| Waddlia chondrophila       | NC_014225_9831   | ggcaggaatggcaggttctgcaaaagatcXcgattgaagaacatgtacagcaagaggcg    |
| Weeksella virosa           | NC_015144_15383  | cttggcgatagcagtttagcaaaacaaatgcXccatccatagtgacggaattccggcagatc |
| Weeksella virosa           | NC_015144_2058   | gaccattctcactcgtcaaatccttgatXcggctactcggcagcaccagcttgcctac     |
| Weeksella virosa           | NC_015144_30418  | cccaccaatcggtcttggttgcatagaccXccttcggttcttggatgcatcttgtgtg     |
| Weeksella virosa           | NC_015144_32126  | ggaattgctgtagcaagtttgggtgggctcXattgtaaccgagacaataaccagattggc   |
| Weeksella virosa           | NC_015144_36223  | cgttggaggttacctatgtacaacaagtgaXgaggagtgaatctgatgagcagatgtac    |
| Weeksella virosa           | NC_015144_39171  | ctatgtcggagatgaggtttgcacctcctaXtcgggattgggttatacatactcacttc    |
| Weeksella virosa           | NC_015144_4169   | gcgtgctgtgtgatgctgattagaactgcaXgtgaaagtgtaattcccccacgattgg     |
| Weeksella virosa           | NC_015144_48474  | ggtgatagctcccgtgttccagaggcaacXcggaaatcccgaagtgtctgatgataaag    |
| Weeksella virosa           | NC_015144_61633  | ccgaccacggtgcgaattgtccaccaagaXatagggttggatgctggctatcaacgctc    |
| Weeksella virosa           | NC_015144_75     | gatcgttattggtgaaacaagcacaataaggXaaaggtttaccgccgctagccgacctg    |
| Xanthobacter autotrophicus | NC_009720_126888 | ctgacggatcacgtggctaagctcacgtgXgttcagaatcgctgttgcagcagatgac     |
| Xanthobacter autotrophicus | NC_009720_133877 | gattggctggaaattgcatggtccaatccXttggctctcatgaaccgatcaccgtttcgg   |
| Xanthobacter autotrophicus | NC_009720_135791 | cttacggatactctacacagatgctactgXagatcaacgatctggcgtgtgagcaggacc   |
| Xanthobacter autotrophicus | NC_009720_148189 | gagtgaggacaatcagggattgaggatattXcactcgtctccgcatcaagcgtgctgtc    |
| Xanthobacter autotrophicus | NC_009720_166968 | gtcgattggccaataatattccaattgaXgaaatgagccagttgccggaccgcgcc       |
| Xanthobacter autotrophicus | NC_009720_20256  | gcttcgtagctgcaatggagtgatgctXgacgccgatacatgacactgtagtttcgac     |
| Xanthobacter autotrophicus | NC_009720_21353  | cggaaacatagtaacttaggagcgtatcXcgtccaccattcactgtcataggtatgg      |
| Xanthobacter autotrophicus | NC_009720_33971  | cccgatattgcttggccgctgtggctXgtcatctttgacaattccagcttctttg        |
| Xanthobacter autotrophicus | NC_009720_3858   | gaaacccaacgcgagagcatgtaactttccXcgcgcatgatgacatcaacattgcggac    |
| Xanthobacter autotrophicus | NC_009720_47381  | caacgacatagcgtccggtcctgtggagXtgaccttaagtcgagtacatcctaacttc     |
| Xanthobacter autotrophicus | NC_009720_64518  | gaactcatcctcaacagtcggatttcccXattcatcaggccgaaagcaattggctg       |
| Xanthobacter autotrophicus | NC_009720_95184  | ggcggaaattatgatcgaaggccggttagXctcggattccgagtaccctatcaatattcc   |

|                        |                  |                                                                 |
|------------------------|------------------|-----------------------------------------------------------------|
| Xanthomonas axonopodis | NC_020800_128869 | gcagatgtcagtcacatctcacgccgctagaXcgaccagggtgcatctgatgtagattccaag |
| Xanthomonas axonopodis | NC_020800_15639  | cagacggcatttgcactgattatgatgatXatgaggattgtccggattaccggctgctc     |
| Xanthomonas axonopodis | NC_020800_167044 | cgttcctcctgcaagccttctccttgcgaXtgtcacgctggaacttatatcccaagtag     |
| Xanthomonas axonopodis | NC_020800_170178 | cgataaacaatcacacgcttgcaggcttcXtcagccaatgcaaacagcgtttgccatcc     |
| Xanthomonas axonopodis | NC_020800_3791   | gtgttaacatgagatcaagccattggcaXtgcacgaaatctagctctcgcattcttg       |
| Xanthomonas axonopodis | NC_020800_40529  | gtcgtttatgaggaaatcggcgtagctcXacgggtgaccgttgccttggcgtctcttc      |
| Xanthomonas axonopodis | NC_020800_44507  | caatgaccgaggcttatcactactcagatgXgttctgcttgattggtactctcgagagatc   |
| Xanthomonas axonopodis | NC_020800_452    | gatcaatgccaccgcagcatccattacgcXacaagcggcattgctgtgaaagactgtc      |
| Xanthomonas axonopodis | NC_020800_57656  | gacatgcttaatgatgcaggagcgtgtcaXcgaagacagcagatcgaagccaagcgcag     |
| Xanthomonas axonopodis | NC_020800_62169  | gtacgattgatcttcgactatctcaaacgXtacaccgtgactggaggatgtagaac        |
| Xanthomonas axonopodis | NC_020800_75393  | gcggatgtcactttgcaagtgcgctgccXtttcaaggagttaaataatcgtgcttg        |
| Xanthomonas axonopodis | NC_020800_87232  | ccagagcagtcgctctgatgatcctgtXgaaggtctttgttagcttgacaaggtac        |
| Xanthomonas axonopodis | NC_020800_95379  | ggcagatgtcgttcatatcgttaccgctgtXtgtacagtaattgacctatcgtctgcc      |
| Xanthomonas campestris | NC_007088_126095 | gtggtatcgtcatcatgacgatcaaacXccctcttcacgcctcagcgaatgcttg         |
| Xanthomonas campestris | NC_007088_143366 | gaaccagcatacatggttgcggtttgcaaXgctatttctcaataccgctatgattcc       |
| Xanthomonas campestris | NC_007088_162527 | caaacgcagtcacggctgtagtgctggtXgtgcagcttctgcaacttaattgctgagc      |
| Xanthomonas campestris | NC_007088_171336 | caatacggctattgagcaacctgatcgtXtacttaccgacaatttaccgtgtcggcg       |
| Xanthomonas campestris | NC_007088_19038  | ggataatgtcggtttaagtcgttcgacggXagccagactcccgaagtgtccgagttcatc    |
| Xanthomonas campestris | NC_007088_39406  | gcctgcaaacaccgcgctggatcagcacagXggcggatcgaatggcttctaaatcaatg     |
| Xanthomonas campestris | NC_007088_64882  | catgacagacagatctgaatcatgaccgXcaactgatccggataatcgcagcattctg      |
| Xanthomonas campestris | NC_007088_71474  | gtagtgatgcaccttccgtgtgagtcXgcacaacgtgtgatcagattgttctcg          |
| Xanthomonas campestris | NC_007088_7992   | cgttctgtggccctgaatgatgtagcaattXagccgatgctgcgaatggcgttaattcag    |
| Xanthomonas campestris | NC_007088_82914  | cgcacagcagctacatagacttctgttXcggcgttctaccgttcttcttggcggagc       |
| Xanthomonas campestris | NC_007088_98538  | ctacaggtgatctcgagaaacgcagctaXttctcggaatgatgttggacggatctgag      |
| Xenorhabdus bovienii   | NC_013892_111069 | ggcttaaccacgggtgcctagtgtgatttccXaggcgtgaagtgtgatcaccatacatagc   |
| Xenorhabdus bovienii   | NC_013892_127446 | ggcttctgccectatggcaagaccagcataXcaggtaatatcattgttacgctccgttgc    |
| Xenorhabdus bovienii   | NC_013892_1545   | cgcactcacatctgaatatttccaccatcaXcgtcattggcattagcgcaggagcgaatgg   |
| Xenorhabdus bovienii   | NC_013892_18317  | ggatgacaggttctaaagaagaatgcctcaXatgtcttccagtcggatgggtggcctgctc   |
| Xenorhabdus bovienii   | NC_013892_63426  | cagtgatgatgtacgcaggatcatgcXaccactgaacaggttgggataaccggagc        |
| Xenorhabdus bovienii   | NC_013892_68194  | catcatgataaccaatgtcgggacggctctXtataataacagccctcagaacatgctgg     |
| Xenorhabdus bovienii   | NC_013892_70523  | cggcgtgtgagggaaatagtgataagcXttcgttctctgaacaggggtgacgttaac       |
| Xenorhabdus bovienii   | NC_013892_77953  | gttagctgcactggattcaattcctgtgacXcattaccatattctgctgcgcaaacagc     |
| Yersinia pestis        | NC_003143_128042 | gtcaacaaccagtagatgaatgtggcagcXtccgtgcaatctcgtatcaaacctaccctc    |
| Yersinia pestis        | NC_003143_13778  | ctctcatgttctgccggcgattatgcXtattattctggatgagcattctcgcgtag        |
| Yersinia pestis        | NC_003143_13792  | gttagctaccgtgccagcctcacgcctgttXgtcagatcggcttgttgaatgggaaatcc    |
| Yersinia pestis        | NC_003143_146396 | cactgatcatgccattcttaactggaaggXcgggttcttctcttccaatccgaccgcg      |
| Yersinia pestis        | NC_003143_146402 | ccgtgtcataggtacgctgtgagagtttacXaagcataaatgccattctgtagcgtgagc    |
| Yersinia pestis        | NC_003143_146403 | gggtatcgattaacgccaatggattgctatXccgtgtcataggtacggctggagatttac    |
| Yersinia pestis        | NC_003143_17251  | gccacatcaccgatgtgattcagttcattXttctactgacgccacagtacagcggagc      |
| Yersinia pestis        | NC_003143_26595  | ccagaggtgtaataatagtggtaccgctXgaatataagatgcgctgggtaagaccgctc     |

|                       |                  |                                                               |
|-----------------------|------------------|---------------------------------------------------------------|
| Yersinia pestis       | NC_003143_78887  | caaggctcatgcttccccggcagaatggcXaccgatgaacaatcacatftaacacatc    |
| Yersinia pestis       | NC_003143_78903  | gatgagataacgcgggtgcatggacgtatXtcattgtcatttcatggcggaataatcgg   |
| Yersinia pestis       | NC_003143_79046  | ggcaacgtaagaactagcgaacgaggactXgcagtcacatcgcgattgttatttccggc   |
| Yersinia pestis       | NC_003143_79055  | gccggttgcattgatgcagaaatccacaXttgatgccgtactgcaatcagcttaac      |
| Yersinia pestis       | NC_003143_79163  | ctatgcctacgggcttggatcgcatggcXaatgaagcattccaatagcaataaaggc     |
| Yersinia pestis       | NC_003143_79566  | gcggtttgaaagatgctatcaagcaactgXaacagaagcggttagcagcaatttccgctc  |
| Yersinia pestis       | NC_003143_79946  | cttggatcagcattgaggtcagccaggtXtacaacattgtattagcagatgctttggc    |
| Zunongwangia profunda | NC_014041_145078 | cccgcgggaatgatggcctccataatccggaXcctataatcataaccgccttattatgatg |
| Zunongwangia profunda | NC_014041_156692 | cttgacatttcccagggtactgatgccggXtcttactctgctgacgcaataatc        |
| Zunongwangia profunda | NC_014041_18178  | ggtaaatgaagcggaccgtaaggtccatXcgttctccgctgtattcctcttaac        |
| Zunongwangia profunda | NC_014041_25811  | cactcatgggttgatgcttctgcgcgaXcgggtatcgtgcaattccacattaagcg      |
| Zunongwangia profunda | NC_014041_36343  | gtcactcaatgggcaaacctgcttcggtXtacggcaggtcaatctgccagatgatag     |
| Zunongwangia profunda | NC_014041_55801  | ggattacaggtccagtcgcatcaaacgtaXatggatagggctgcaatccctctacgatg   |
| Zunongwangia profunda | NC_014041_67563  | gctacagcatctcaaccagaagtagaggXgaacaagaagttcaggaagtagcaggaatg   |
| Zunongwangia profunda | NC_014041_80281  | gtcccccaagtatggaagtaagtaactaXgctaacaaccggcaggtccaatcactccc    |
| Zymomonas mobilis     | NC_013355_142    | gtaataaagctggctatgatgctgatgccaXaaactccgaaccgctctgccagattgg    |
| Zymomonas mobilis     | NC_013355_19641  | cggtcgcctcaaaagcgtcatcttgcctaXcaagataccaagccgaaacgatcgtttgg   |
| Zymomonas mobilis     | NC_013355_26152  | gtcgtatcactggtgcagaactggctgatXggactgatgccaataatagcccgaagcc    |
| Zymomonas mobilis     | NC_013355_29119  | cggattgatgaccttttctcaggccttXatgatgatgccagatccggtgcaagc        |
| Zymomonas mobilis     | NC_013355_31965  | ctgttctgaatggccttgaccaaatgtggXcatgttgaacaatgatcaaggttgcggc    |
| Zymomonas mobilis     | NC_013355_45960  | caatcgatagggcgatagcctaataagXatcgtgcatgatattggcgctacactc       |
| Zymomonas mobilis     | NC_013355_60542  | gtatttaaacagcctatcagttccctaaaXgaaggcttgcctatctgcggcagacgg     |
| Zymomonas mobilis     | NC_013355_67772  | ctggcgtattctctgggatattattattggXcatccaccacatagaagatgtggccgccg  |
| Zymomonas mobilis     | NC_013355_8294   | gaatgacctgatccgttagtattgcgcgXccaaccggtagaataatcttctgcaacg     |
| AGGR                  | AGGR_10011       | aacagcattgagagttcctccagttatgXagaagcaggaacaacgtctccaccagcagc   |
| AGGR                  | AGGR_11761       | cggtgaaaggttcttctcctgctgaaagtXcgccaagggatactgctacgataatgcctg  |
| AGGR                  | AGGR_11941       | attacgaggggtggatcaatcacaagaatXaacagaacctcgttagacctgttccat     |
| AGGR                  | AGGR_5191        | cattcgtcgtatagatcactttcggtatgXggcgatcacgctgtttagcactcagtg     |
| AGGR                  | AGGR_6181        | gggaatatctacggcagcagccagtaacgXcgcatagtgctgtgggtatcgtcaccac    |
| AGGR                  | AGGR_8071        | aagacgctgctccctcaggcggcggagacgtXgtctaaagctgttacttggctcaaccg   |
| AGGR                  | AGGR_8311        | gctttattatcaagttatgattgcctgXcctaaagaaatctcatgctgcatgagcc      |
| BFPA                  | BFPA_121         | tcagaagtaatgagcgcacgtctgcaatXtctgattccaataagtcgcaagaatgctatt  |
| BFPA                  | BFPA_151         | aatggtctgtatattggcagaccagttatXtcagaagtaatgagcgcacagctgcaatt   |
| BFPA                  | BFPA_161         | atattggcagaccagttatagtgattggXtgagcgcacagctctgcaatfaatgctctg   |
| BFPA                  | BFPA_171         | gaccagttatagtgattggactcaacgatXgtctgcaatfaatgctctgtatattgggca  |
| BFPA                  | BFPA_311         | catttggttactatctgacgcttaccaggtXtaaatgtagtccagcaacaataaacgg    |
| BFPA                  | BFPA_341         | tgataaagcggcatgtttagtcttgcXcatttggttactatctgacgcttaccaggt     |
| BFPA                  | BFPA_351         | ggcatgtgttagtcttgaaccttgaactXctatctgacgcttaccaggttgataaagc    |
| BFPA                  | BFPA_361         | agtcttgaaccttgaacttagtactcaXcttaccaggttgataaagcggcatgtt       |
| BFPA                  | BFPA_371         | ccttgaacttagtactcagcgaaggtXtgataaagcggcatgtttagtcttgcXaa      |

|       |            |                                                               |
|-------|------------|---------------------------------------------------------------|
| BFPA  | BFPA_381   | aggtaactcagc gaaaggctacgggttaaXggcatgtgttagcttgcaccttgaactt   |
| BFPA  | BFPA_41    | cgcttgctgccaccgttacgcaggtgtgaXtgtctttgattgaatctgcaatgtgcttg   |
| BFPA  | BFPA_461   | ctgctaaatcgactgctattactcctgctgXttacatcatttgtaatagcgtgatcagg   |
| EAEA  | EAEA_1001  | taggcaccaagctgatatatgagcagattXttaatggctatctaccgtcatccggcat    |
| EAEA  | EAEA_1411  | ggcttgatcgtatcgtctgggatgatagXaagattcagttgatcgttaagagcaaatc    |
| EAEA  | EAEA_1606  | attaccgttctgctgaatggtaagttgtcXggcaatagcttaacaatgtacagcttact   |
| EAEA  | EAEA_1611  | cgttctgctgaatggtaagttgtcaccacXtagcttaacaatgtacagcttactattac   |
| EAEA  | EAEA_1846  | tcgagtacgccaggacaggtcgtctgctXgctaaccgtaaggcaaccgtaacgttgaag   |
| EAEA  | EAEA_2401  | aaagtcacttgaatggtaaggcaggtgcXaccagatcgcgactgctgatcagcagg      |
| EAEA  | EAEA_566   | cttctgcacagttgcagcctggttacaacXataccgctcttggatcgtgtaaccagg     |
| EAEA  | EAEA_576   | gttcagcctggttacaacattatggaacXtggatcgtgtaaccagcctctgcaca       |
| EAEA  | EAEA_586   | tggttacaacattatggaacgcagaggttXgtaaccagcctctgcacagttgcagcgc    |
| EAEA  | EAEA_601   | ggaacgcagaggttaactgcagaggtgtXtcacagttgcagcctggttacaacattat    |
| EAEA  | EAEA_721   | attgactcccgtttacggcaatttaggtXctggcattggctcaggtcggagcgcgttac   |
| EAST1 | EAST1_1261 | agtgtggccagttccacttctgcacggttXcgtcagattgtataaccgtccaccacgtg   |
| EAST1 | EAST1_1341 | tagatcacttgggatgtccgttgataaXctgtttagcactgatggcattcgtcgtgta    |
| EAST1 | EAST1_1531 | agtccctcatgacacgaagcgcagcgtgtXtgccttcaggtcgcgagtgacggcttgt    |
| EAST1 | EAST1_1551 | cgcagcctgttgcgaccatagcagatgXaccgctttagctcctccatgacacgaag      |
| EAST1 | EAST1_1557 | ctgttgcgaccatagcagatgcataacXttgtagctcctccatgacacgaagcgcagg    |
| EAST1 | EAST1_1566 | accatagcagatgcataactggatggcXttccatgacacgaagcgcagcctgttgcgc    |
| IPAH  | IPAH_1561  | tccatccagtcacgttctgctgagaatgXgtatcatcagttgacagctgcggcggcca    |
| IPAH  | IPAH_1801  | caacctgttctccggcggccacagcagtaaXicatggcggcagcaagtcagagcaggaa   |
| IPAH  | IPAH_241   | gatgccattcgttataatgctcgaatgcctXgtggcagcagataaccagcgcactatgcg  |
| IPAH  | IPAH_28081 | agtacagcgcactgctatgacaacgcgataXaaggaagccggattactggcatcaacagga |
| IPAH  | IPAH_40321 | tccggcttcttaagccgctgtgttaggcXgtcgcctgtacttctgttggatgccagtaa   |
| IPAH  | IPAH_47821 | gttgatgccagtaatccggcttcttaagcXgctgtgtcatcagctgcctgtacttct     |
| IPAH  | IPAH_64621 | taacagcgtaccggcagcagagatgttXctggagattctcagcctcatggagcggcg     |
| IPAH  | IPAH_70741 | caggtactgtaacgctacgcaagcgcctcXccgaactatctctgttgccttggcgaat    |
| IPAH  | IPAH_71041 | caccggatacaccagagaacgatgcagcctXtgcctgctatcaggtgtgttctggcgca   |
| IPAH  | IPAH_72541 | taacgattgtcagttactgagcgttccgcXtccacttctgttccatcagcgtggcaccgg  |
| IPAH  | IPAH_82261 | ccgtatcatcagttgacgactcggcggcXcgataacatggtgtatagcagagaacacat   |
| IPAH  | IPAH_82561 | aagacttcttctggtattgcttacccaXaacaacctgttctccggcggccacagcagt    |
| IPAH  | IPAH_89221 | ccggcttcttaagccgctgtgttaggcXtccctgtacttctgttggatgccagtaat     |
| LT    | LT_151     | atgaatccaggttcttctccaaagcttXtgaatgtccacaaccttgtgtgcatg        |
| LT    | LT_351     | cagaaacctcctgtcatatgggtgagggcXatactgagaataggtatccacctaaccg    |
| LT    | LT_361     | ctgttcatatgggtgagggctgtatagccXatatggtattccacctaacgcagaaacctc  |
| LT    | LT_371     | gggtgagggctgtatagcctaatacatcaXccacctaacgcagaaacctcctgttcatat  |
| LT    | LT_381     | gtatagcctaatacatcattacattaaXcagaaacctcctgttcatatgggtgagggc    |
| LT    | LT_531     | atctgacaagccggttgttctctcgtXtaagagaagtggaacatatacctcatcat      |
| LT    | LT_541     | gccggttcttctcctcgcgtgatcataXggaacatatacctcatatctgacaaa        |

|      |          |                                                               |
|------|----------|---------------------------------------------------------------|
| LT   | LT_551   | gttcctctcgcgtgatcataaagattaataXccgtcatatctgacaaagccggttgt     |
| LT   | LT_571   | aagattaatattcatttgagtcctctatcXgccggttgtgttcctctcgcgtgatcata   |
| STH  | STH_1021 | agcgttccctgcaatatttcacagtgattXcagcgccaacgatgctcgtcaacaaagcg   |
| STH  | STH_121  | agcgcgctcgccaaagcagfgaataaccagXaatgcctgaccgatagaataattcggc    |
| STH  | STH_331  | agggatatttcaatcagatgctcgggtgXgctgattccgggatggtgtaataaccggt    |
| STH  | STH_451  | gtaaactgtgctgctgctgatacatXgctcggataaccaatcacgctcggccaccgc     |
| STH  | STH_481  | gctgtgacctcagctgtccggctgtcXgtaaacgtgtggctgtcggctgatacat       |
| STH  | STH_511  | agtttctagcccaatgttctgtaaccagXgctgtgacctcagctgtccggctgtc       |
| STH  | STH_661  | gttgtagcaatcactacgccactgttccaXgtcacagccttgcattctctgactcttc    |
| STH  | STH_691  | gaagtgataggagagagaatctgacatctcXgttgtgacgaatcactacgccactgttcca |
| STH  | STH_841  | gcgcggttcgtggtgcatgctgagaattgaXgactcaccgaccatagataagtacatg    |
| STH  | STH_871  | gtcgtgtcgtaaatgcgtggatgggtgaaXgcccgggttcgtggtgcatgctgagaattga |
| STH  | STH_991  | cagcgccaacgatgctcgtcaacaaagcgXtagtgttcaacgctgccgtccgggcaatc   |
| STP  | STP_1001 | ccttcattgttgtgcatgaaccgaacgXcactatcaattatgttgatcgtgatca       |
| STP  | STP_1021 | aaccgaacgcgatttcgatgatttacgcgXtcgctgatcaccttcattgttgtgcatg    |
| STP  | STP_1121 | ttaaaccctggcgttccatcgaaatctgaXctacgtgtcaacgatctgatccggcgc     |
| STP  | STP_121  | acataatggccacataaagccttatgcccagXtttactgctctgctgcctggccttta    |
| STP  | STP_21   | cggcacagccgttgggtgcaggcacgctctXagaagaactctgtggatttccgctcta    |
| STP  | STP_221  | agattggtatctgattaccacgctgactXcggcgcgagtaaacactactatgccaaga    |
| STP  | STP_341  | ttcgcacccgatgttggtagctcgggtgXaacagctgccaagcatatggttattgatc    |
| STP  | STP_361  | agtctgggtgttattaatcctgaatcXgttattgatcttgcacccgatgttgggtg      |
| STP  | STP_41   | gcacgctcttctctattcagttaggttXtcgcgctctacggcacagccgttggctgag    |
| STP  | STP_541  | ctcaccagataggatcgtattccgtgXacgaccaggtagagttcaatcagaatacc      |
| STP  | STP_741  | accttcgtatattgaagcggctaaagaagaXcttgtctttagctgctgcttctattcc    |
| STP  | STP_981  | tatgttgatcgtgatcaccttcattgtXaagtcgtgcattaaaccgcgcaactcaat     |
| STX1 | STX1_320 | gtagctataaccagttacagcgtgtgagXgtacaacagcggttacattgtctggtgaca   |
| STX1 | STX1_628 | ggacaagactctgttcgttaggaagaattXaggttgagtagcgtctgctgactatcat    |
| STX1 | STX1_725 | cgcgagttgccagaatggcatctgatgagXcattaataactgaattgcatcatcatgcat  |
| STX2 | STX2_351 | ggttccatgacaacggacagcagttatacXtatacatatcatcagtgcccgggtgacaac  |
| STX2 | STX2_366 | ggacagcagttataccactctgcaacgtgXgccccgtgtgacaacggtttccatgacaac  |
| STX2 | STX2_394 | gtcgcagcgtggaacgttccggaatgcaaXacggacagcagttataccactctgcaacgt  |
| STX2 | STX2_406 | gaacgttccggaatgcaaatcagtcgtcacXtataccactctgcaacgtgctgcagcgtg  |
| STX2 | STX2_431 | gtcactcactggttcatatctggtgXcgcctggaacgttccggaatgcaaatcagtc     |
| STX2 | STX2_461 | taatggagttcagtgtaatacaatgaccaXgtcactcactggttcatatctggtgct     |
| STX2 | STX2_561 | gagagaatttctcaggcactgtctgaaacXagcagaagccttacgcttcaggcagatata  |
| STX2 | STX2_576 | ggcactgtctgaaactgctcctgtgtatacXcttcaggcagatagagagaatttctgca   |
| STX2 | STX2_731 | tggcactgtggcgttatactgaattgtcXgaaatcttftaataatatacggcgatac     |
| STX2 | STX2_811 | gaatgtcagataactggcgacagggccgttXgttcgcccgtgaatgaagatagtaacca   |



51 **Table S2.** Relative Abundance of Genera Detected by Molecular Probes in  
 52 Shotgun Sequencing Samples as Identified with the Greengenes (2012)  
 53 Taxonomy.

54

| Taxonomic Identification |                           | Relative Abundance* |      |         |      |          |      |
|--------------------------|---------------------------|---------------------|------|---------|------|----------|------|
|                          |                           | 3/25/14             |      | 7/21/15 |      | 10/27/15 |      |
| Phylum                   | Genus                     | Raw                 | Adj  | Raw     | Adj  | Raw      | Adj  |
| Proteobacteria           | <i>Dechloromonas</i>      | 0.00                | 0.00 | 0.11    | 0.05 | 1.97     | 1.04 |
| Firmicutes               | <i>Streptococcus</i>      | 0.70                | 0.42 | 0.63    | 0.44 | 0.31     | 0.20 |
| Actinobacteria           | <i>Bifidobacterium</i>    | 0.92                | 0.90 | 0.22    | 0.22 | 0.17     | 0.17 |
| Bacteroidetes            | <i>Runella</i>            | 0.12                | 0.11 | 0.33    | 0.32 | 0.43     | 0.46 |
| Euryarchaeota            | <i>Methanobrevibacter</i> | 0.14                | 0.13 | 0.02    | 0.02 | 0.01     | 0.01 |
| Firmicutes               | <i>Lactobacillus</i>      | 0.10                | 0.06 | 0.02    | 0.01 | 0.03     | 0.01 |
| Synergistetes            | <i>Anaerobaculum</i>      | 0.00                | 0.00 | 0.03    | 0.03 | 0.09     | 0.10 |
| Proteobacteria           | <i>Enterobacter</i>       | 0.00                | 0.00 | 0.03    | 0.01 | 0.04     | 0.01 |
| Firmicutes               | <i>Clostridium</i>        | 0.01                | 0.00 | 0.00    | 0.00 | 0.03     | 0.01 |
| Fusobacteria             | <i>Sebaldella</i>         | 0.00                | 0.00 | 0.02    | 0.01 | 0.01     | 0.01 |
| Bacteroidetes            | <i>Bacteroides</i>        | 0.00                | 0.00 | 0.00    | 0.00 | 0.03     | 0.01 |
| Firmicutes               | <i>Leuconostoc</i>        | 0.01                | 0.01 | 0.00    | 0.00 | 0.01     | 0.01 |
| Firmicutes               | <i>Enterococcus</i>       | 0.02                | 0.01 | 0.00    | 0.00 | 0.00     | 0.00 |
| Verrucomicrobia          | <i>Akkermansia</i>        | 0.01                | 0.01 | 0.01    | 0.01 | 0.00     | 0.00 |
| Proteobacteria           | <i>Tolumonas</i>          | 0.00                | 0.00 | 0.02    | 0.00 | 0.00     | 0.00 |
| Proteobacteria           | <i>Comamonas</i>          | 0.00                | 0.00 | 0.01    | 0.01 | 0.00     | 0.00 |

55  
56

\*Raw- uncorrected for copy number; Adj- corrected for 16S rRNA copy number with CopyRighter

57 **Table S3.** Relative Abundance of Genera from Shotgun Sequencing Samples as  
58 Identified with the MiDAS Taxonomy. OTUs were grouped by genus-level  
59 identification if possible. 'Novel OTU' represents OTUs not represented in the  
60 MiDAS database.

| Taxonomic Identification |                                  | Relative Abundance |         |          |
|--------------------------|----------------------------------|--------------------|---------|----------|
| Phylum                   | Genus                            | 3/25/14            | 7/21/15 | 10/27/15 |
| Proteobacteria           | CPB_P15                          | 45.72              | 0.60    | 0.42     |
| Actinobacteria           | Tetrasphaera                     | 8.62               | 12.84   | 4.18     |
| Actinobacteria           | Mycobacterium                    | 9.66               | 6.25    | 3.07     |
| Proteobacteria           | CPB_M38**                        | 0.04               | 6.54    | 8.17     |
| Proteobacteria           | CPB_C95***                       | 0.63               | 9.18    | 2.74     |
| Proteobacteria           | Zoogloea                         | 0.00               | 0.18    | 8.54     |
| Actinobacteria           | Propioniciclava                  | 4.22               | 2.16    | 0.87     |
| Proteobacteria           | Acidovorax                       | 0.90               | 2.64    | 1.84     |
| Proteobacteria           | Thermomonas                      | 0.44               | 3.33    | 1.19     |
| Bacteroidetes            | Flavobacterium                   | 0.01               | 1.49    | 3.36     |
| Actinobacteria           | Gordonia                         | 0.03               | 1.61    | 2.95     |
| Actinobacteria           | Fodinibacter                     | 1.58               | 2.03    | 0.56     |
| Proteobacteria           | Rhodobacter                      | 0.93               | 1.61    | 1.48     |
| Bacteroidetes            | MK04                             | 0.03               | 2.70    | 1.17     |
| Unassigned               | Unassigned; novel OTU1           | 0.00               | 0.01    | 3.53     |
| Proteobacteria           | 188up                            | 0.25               | 1.03    | 1.93     |
| Firmicutes               | Streptococcus                    | 1.21               | 0.84    | 0.43     |
| Proteobacteria           | Acinetobacter                    | 0.02               | 1.03    | 1.23     |
| Proteobacteria           | Comamonas                        | 0.15               | 1.41    | 0.69     |
| Actinobacteria           | Leucobacter                      | 1.11               | 0.67    | 0.39     |
| Actinobacteria           | f__Propionibacteriaceae_FM872539 | 0.87               | 0.47    | 0.80     |
| Bacteroidetes            | Chryseobacterium                 | 0.35               | 0.79    | 0.96     |
| Proteobacteria           | Bosea                            | 1.05               | 0.55    | 0.41     |
| Proteobacteria           | GKS98 freshwater group           | 1.50               | 0.30    | 0.18     |
| Proteobacteria           | Altererythrobacter               | 0.62               | 0.76    | 0.47     |
| Proteobacteria           | Novosphingobium                  | 0.10               | 0.95    | 0.66     |
| Unassigned               | Unassigned; novel OTU2           | 0.00               | 0.00    | 1.65     |
| Proteobacteria           | Reyranella                       | 0.53               | 0.67    | 0.39     |
| Bacteroidetes            | Sediminibacterium                | 0.02               | 0.35    | 1.19     |
| Proteobacteria           | Phenylobacterium                 | 0.05               | 0.85    | 0.63     |
| Actinobacteria           | Propionimonas                    | 0.85               | 0.39    | 0.18     |
| Proteobacteria           | Rhizobium                        | 0.69               | 0.34    | 0.33     |
| Proteobacteria           | f__Moraxellaceae_DQ640687        | 0.02               | 0.08    | 1.25     |
| Actinobacteria           | Microbacterium                   | 0.77               | 0.29    | 0.26     |
| Actinobacteria           | Bifidobacterium                  | 0.92               | 0.22    | 0.17     |
| Actinobacteria           | Iamia                            | 0.56               | 0.50    | 0.24     |
| Bacteroidetes            | Taibaiella                       | 0.02               | 0.73    | 0.38     |
| Proteobacteria           | Devosia                          | 0.42               | 0.43    | 0.25     |
| Proteobacteria           | Sphingopyxis                     | 0.00               | 0.32    | 0.77     |
| Bacteroidetes            | Fluviicola                       | 0.00               | 0.03    | 1.05     |
| Proteobacteria           | Variovorax                       | 0.11               | 0.70    | 0.25     |
| Bacteroidetes            | f__env.OPS_17_HM268707           | 0.00               | 0.03    | 1.01     |
| Proteobacteria           | Lautropia                        | 0.04               | 0.49    | 0.46     |
| Bacteroidetes            | f__Chitinophagaceae_EU234264     | 0.00               | 0.00    | 0.98     |
| Proteobacteria           | Dechloromonas                    | 0.00               | 0.04    | 0.93     |
| Proteobacteria           | Thiothrix                        | 0.33               | 0.19    | 0.43     |
| Firmicutes               | Christensenellaceae R-7 group    | 0.13               | 0.66    | 0.17     |

|                  |                                      |      |      |      |
|------------------|--------------------------------------|------|------|------|
| Proteobacteria   | Candidatus Accumulibacter            | 0.00 | 0.02 | 0.93 |
| Proteobacteria   | Ferribacterium                       | 0.00 | 0.07 | 0.85 |
| Chloroflexi      | Candidatus Defluviifilum             | 0.00 | 0.68 | 0.24 |
| Bacteroidetes    | Runella                              | 0.12 | 0.33 | 0.43 |
| Actinobacteria   | o__Frankiales_EU104204               | 0.26 | 0.41 | 0.18 |
| Proteobacteria   | Brachymonas                          | 0.12 | 0.64 | 0.09 |
| Proteobacteria   | Perlucidibaca                        | 0.00 | 0.05 | 0.77 |
| Bacteroidetes    | CYCU-0281                            | 0.10 | 0.68 | 0.04 |
| Firmicutes       | Intestinibacter                      | 0.32 | 0.23 | 0.21 |
| Proteobacteria   | f__Beijerinckiaceae_CU920741         | 0.40 | 0.14 | 0.22 |
| Actinobacteria   | Nocardioides                         | 0.27 | 0.37 | 0.12 |
| Actinobacteria   | Knoellia                             | 0.36 | 0.34 | 0.04 |
| Proteobacteria   | Arenimonas                           | 0.00 | 0.32 | 0.41 |
| Proteobacteria   | Paracoccus                           | 0.05 | 0.28 | 0.38 |
| Proteobacteria   | f__Comamonadaceae_AF236010           | 0.02 | 0.23 | 0.45 |
| Verrucomicrobia  | f__Verrucomicrobiaceae_JN981876      | 0.00 | 0.63 | 0.07 |
| Chloroflexi      | o__JG30-KF-CM45_DQ129350             | 0.40 | 0.14 | 0.14 |
| Verrucomicrobia  | Prostheco bacter                     | 0.00 | 0.31 | 0.37 |
| Actinobacteria   | Janibacter                           | 0.35 | 0.30 | 0.03 |
| Bacteroidetes    | Flavihumibacter                      | 0.03 | 0.28 | 0.33 |
| Actinobacteria   | Aestuariiimicrobium                  | 0.49 | 0.10 | 0.05 |
| Bacteroidetes    | Cloacibacterium                      | 0.02 | 0.23 | 0.38 |
| Bacteroidetes    | f__WCHB1-69_HQ178727                 | 0.00 | 0.12 | 0.51 |
| Proteobacteria   | Roseomonas                           | 0.14 | 0.21 | 0.25 |
| Proteobacteria   | f__Comamonadaceae_AB286648           | 0.00 | 0.00 | 0.59 |
| Proteobacteria   | o__Myxococcales_novel OTU6           | 0.00 | 0.18 | 0.41 |
| Actinobacteria   | P58                                  | 0.14 | 0.23 | 0.21 |
| Proteobacteria   | MNG7                                 | 0.13 | 0.29 | 0.16 |
| Proteobacteria   | f__mle1-27_KM016296                  | 0.01 | 0.47 | 0.09 |
| Proteobacteria   | Methyloversatilis                    | 0.00 | 0.00 | 0.55 |
| Proteobacteria   | CPB_S18                              | 0.00 | 0.41 | 0.12 |
| Proteobacteria   | Hydrogenophaga                       | 0.08 | 0.27 | 0.18 |
| Proteobacteria   | Afipia                               | 0.38 | 0.10 | 0.05 |
| Verrucomicrobia  | Luteolibacter                        | 0.00 | 0.48 | 0.05 |
| Proteobacteria   | f__Alcaligenaceae_EU104103           | 0.24 | 0.27 | 0.01 |
| Proteobacteria   | Shinella                             | 0.23 | 0.18 | 0.10 |
| Bacteroidetes    | f__env.OPS 17_novel OTU17            | 0.01 | 0.05 | 0.45 |
| Proteobacteria   | f__Methylophilaceae_KC189785         | 0.00 | 0.19 | 0.31 |
| Proteobacteria   | Bdellovibrio                         | 0.17 | 0.22 | 0.10 |
| Bacteroidetes    | PHOS-HE28                            | 0.00 | 0.05 | 0.45 |
| Proteobacteria   | Leptothrix                           | 0.00 | 0.10 | 0.39 |
| Saccharibacteria | p__Saccharibacteria_HM584360         | 0.00 | 0.48 | 0.01 |
| Saccharibacteria | Skagenf80                            | 0.11 | 0.27 | 0.10 |
| Bacteroidetes    | QEDR3BF09                            | 0.01 | 0.39 | 0.08 |
| Proteobacteria   | Sphingobium                          | 0.00 | 0.23 | 0.24 |
| Proteobacteria   | Aeromonas                            | 0.00 | 0.02 | 0.43 |
| Proteobacteria   | f__Comamonadaceae_EU800316           | 0.18 | 0.14 | 0.12 |
| Firmicutes       | Trichococcus                         | 0.35 | 0.03 | 0.07 |
| Actinobacteria   | Jatrophihabitans                     | 0.13 | 0.20 | 0.10 |
| Actinobacteria   | rJ14                                 | 0.18 | 0.17 | 0.08 |
| Proteobacteria   | f__Alcaligenaceae_AB516070           | 0.15 | 0.25 | 0.03 |
| Proteobacteria   | f__mle1-27_JQ624277                  | 0.00 | 0.15 | 0.28 |
| Bacteroidetes    | f__WCHB1-69_JQ723668                 | 0.00 | 0.09 | 0.33 |
| Verrucomicrobia  | f__FukuN18 freshwater group_DQ415853 | 0.01 | 0.40 | 0.00 |
| Proteobacteria   | Bordetella                           | 0.29 | 0.07 | 0.05 |
| Proteobacteria   | f__B142_JQ624330                     | 0.19 | 0.12 | 0.09 |
| Verrucomicrobia  | f__Verrucomicrobiaceae_GQ396806      | 0.01 | 0.34 | 0.05 |
| Actinobacteria   | Collinsella                          | 0.25 | 0.13 | 0.01 |
| Bacteroidetes    | f__Chitinophagaceae_KC255350         | 0.00 | 0.19 | 0.20 |

|                  |                                  |      |      |      |
|------------------|----------------------------------|------|------|------|
| Proteobacteria   | Marinobacterium                  | 0.00 | 0.24 | 0.14 |
| Bacteroidetes    | Paludibacter                     | 0.00 | 0.07 | 0.31 |
| Proteobacteria   | f__Comamonadaceae_JW950651       | 0.02 | 0.19 | 0.17 |
| Actinobacteria   | f__Intrasporangiaceae_EF063716   | 0.22 | 0.15 | 0.01 |
| Bacteroidetes    | f__Chitinophagaceae_AB286620     | 0.00 | 0.00 | 0.38 |
| Proteobacteria   | Rhodiferax                       | 0.10 | 0.03 | 0.25 |
| Proteobacteria   | Meganema                         | 0.05 | 0.14 | 0.17 |
| Proteobacteria   | Azospira                         | 0.00 | 0.02 | 0.34 |
| Bacteroidetes    | Ferruginibacter                  | 0.00 | 0.16 | 0.20 |
| Gracilibacteria  | p__Gracilibacteria_EU104071      | 0.00 | 0.30 | 0.05 |
| Actinobacteria   | Dietzia                          | 0.08 | 0.18 | 0.09 |
| Proteobacteria   | Tahibacter                       | 0.00 | 0.28 | 0.07 |
| Planctomycetes   | Planctomyces                     | 0.04 | 0.17 | 0.13 |
| Actinobacteria   | f__Propionibacteriaceae_HM773522 | 0.21 | 0.08 | 0.05 |
| Proteobacteria   | Aquabacterium                    | 0.00 | 0.01 | 0.33 |
| Proteobacteria   | Ancalomicrobium                  | 0.14 | 0.14 | 0.05 |
| Proteobacteria   | Chitinivorax                     | 0.00 | 0.00 | 0.33 |
| Firmicutes       | Blautia                          | 0.21 | 0.05 | 0.07 |
| Firmicutes       | Subdoligranulum                  | 0.22 | 0.06 | 0.04 |
| Bacteroidetes    | Niabella                         | 0.06 | 0.18 | 0.07 |
| Gemmatimonadetes | Gemmatimonas                     | 0.00 | 0.16 | 0.14 |
| Proteobacteria   | f__A0839_JQ624960                | 0.15 | 0.11 | 0.04 |
| Proteobacteria   | Simplicispira                    | 0.02 | 0.08 | 0.20 |
| Actinobacteria   | f__PeM15_KF697453                | 0.00 | 0.12 | 0.17 |
| Proteobacteria   | f__Hydrogenophilaceae_JN391552   | 0.00 | 0.00 | 0.29 |
| Firmicutes       | f__Eubacteriaceae_KJ881289       | 0.11 | 0.10 | 0.08 |
| Firmicutes       | Erysipelothrix                   | 0.00 | 0.23 | 0.05 |
| Proteobacteria   | Aquimonas                        | 0.00 | 0.02 | 0.26 |
| Proteobacteria   | f__Methylocystaceae_JF828745     | 0.05 | 0.16 | 0.05 |
| Proteobacteria   | Gemmobacter                      | 0.06 | 0.07 | 0.13 |
| Firmicutes       | Lactococcus                      | 0.19 | 0.05 | 0.01 |
| Proteobacteria   | Ottowia                          | 0.10 | 0.13 | 0.03 |
| Bacteroidetes    | c__WCHB1-32_KJ578040             | 0.00 | 0.07 | 0.18 |
| Planctomycetes   | Pirellula                        | 0.01 | 0.16 | 0.08 |
| Actinobacteria   | Marmoricola                      | 0.09 | 0.11 | 0.05 |
| Proteobacteria   | f__Moraxellaceae_HE650022        | 0.01 | 0.00 | 0.24 |
| Proteobacteria   | f__Comamonadaceae_novel_OTU16    | 0.01 | 0.05 | 0.18 |
| Planctomycetes   | Isosphaera                       | 0.10 | 0.08 | 0.07 |
| Bacteroidetes    | Hydrotalea                       | 0.00 | 0.24 | 0.00 |
| Chlorobi         | Ignavibacterium                  | 0.00 | 0.16 | 0.08 |
| Proteobacteria   | Methylomonas                     | 0.00 | 0.00 | 0.24 |
| Proteobacteria   | f__Comamonadaceae_AB077038       | 0.02 | 0.16 | 0.05 |
| Proteobacteria   | f__Rhodobacteraceae_JN104393     | 0.06 | 0.05 | 0.12 |
| Proteobacteria   | 12up                             | 0.00 | 0.01 | 0.22 |
| Proteobacteria   | Arcobacter                       | 0.00 | 0.00 | 0.22 |
| Bacteroidetes    | f__NS11-12_marine_group_AF361199 | 0.00 | 0.01 | 0.21 |
| Proteobacteria   | Pseudomonas                      | 0.00 | 0.01 | 0.21 |
| Proteobacteria   | f__A0839_LN570495                | 0.08 | 0.10 | 0.04 |
| SHA-109          | p__SHA-109_KC189732              | 0.21 | 0.01 | 0.00 |
| Firmicutes       | Clostridium sensu stricto 1      | 0.08 | 0.07 | 0.07 |
| Euryarchaeota    | Methanosarcina                   | 0.15 | 0.02 | 0.04 |
| Bacteroidetes    | f__Chitinophagaceae_HQ640538     | 0.00 | 0.00 | 0.21 |
| Proteobacteria   | Hyphomicrobium                   | 0.04 | 0.12 | 0.04 |
| Proteobacteria   | Mesorhizobium                    | 0.08 | 0.07 | 0.05 |
| Unassigned       | Unassigned; novel OTU23          | 0.00 | 0.00 | 0.20 |
| Verrucomicrobia  | Opitutus                         | 0.00 | 0.05 | 0.14 |
| Proteobacteria   | f__Comamonadaceae_HG003356       | 0.01 | 0.01 | 0.17 |
| Proteobacteria   | Dokdonella                       | 0.00 | 0.16 | 0.03 |
| Saccharibacteria | p__Saccharibacteria_JN398100     | 0.00 | 0.16 | 0.03 |

|                        |                                    |      |      |      |
|------------------------|------------------------------------|------|------|------|
| Proteobacteria         | Defluviimonas                      | 0.03 | 0.10 | 0.05 |
| Bacteroidetes          | Leadbetterella                     | 0.01 | 0.16 | 0.01 |
| Saccharibacteria       | p__Saccharibacteria_novel_OTU22    | 0.00 | 0.17 | 0.01 |
| Proteobacteria         | Sulfuritalea                       | 0.00 | 0.06 | 0.12 |
| Bacteroidetes          | f__AKYH767_JN679145                | 0.00 | 0.07 | 0.10 |
| Bacteroidetes          | f__Saprosiraceae_EU104036          | 0.00 | 0.12 | 0.05 |
| Euryarchaeota          | Methanobrevibacter                 | 0.14 | 0.02 | 0.01 |
| Proteobacteria         | f__Beijerinckiaceae_KC633563       | 0.04 | 0.10 | 0.03 |
| Bacteroidetes          | f__Chitinophagaceae_EU104171       | 0.00 | 0.00 | 0.17 |
| Bacteroidetes          | f__Chitinophagaceae_JN391913       | 0.00 | 0.00 | 0.17 |
| Proteobacteria         | f__Hydrogenophilaceae_KM410434     | 0.00 | 0.00 | 0.17 |
| Bacteroidetes          | f__Chitinophagaceae_KC331462       | 0.00 | 0.09 | 0.08 |
| Bacteroidetes          | Pedobacter                         | 0.00 | 0.05 | 0.12 |
| Proteobacteria         | Prosthecomicrobium                 | 0.08 | 0.04 | 0.05 |
| Proteobacteria         | Moraxella                          | 0.01 | 0.09 | 0.07 |
| Proteobacteria         | o__Xanthomonadales_EU104062        | 0.00 | 0.11 | 0.05 |
| Proteobacteria         | Sorangium                          | 0.01 | 0.07 | 0.08 |
| Bacteroidetes          | c__WCHB1-32_AY444993               | 0.00 | 0.00 | 0.16 |
| Proteobacteria         | f__Nitrosomonadaceae_KJ783141      | 0.00 | 0.00 | 0.16 |
| Bacteroidetes          | f__Saprosiraceae_EU104013          | 0.05 | 0.05 | 0.05 |
| Firmicutes             | Anaerostipes                       | 0.10 | 0.02 | 0.04 |
| Chloroflexi            | o__JG30-KF-CM45_DQ130040           | 0.08 | 0.04 | 0.04 |
| Proteobacteria         | f__Alcaligenaceae_GQ422442         | 0.12 | 0.01 | 0.03 |
| Proteobacteria         | Alicyclophilus                     | 0.01 | 0.09 | 0.05 |
| Actinobacteria         | f__Microthricaceae_HM339078        | 0.00 | 0.10 | 0.05 |
| Thermotogae            | Defluviitoga                       | 0.03 | 0.04 | 0.08 |
| Bacteroidetes          | Filimonas                          | 0.00 | 0.11 | 0.04 |
| Firmicutes             | Ruminiclostridium 5                | 0.14 | 0.01 | 0.00 |
| Proteobacteria         | CPB_S60                            | 0.00 | 0.04 | 0.10 |
| Bacteroidetes          | f__NS11-12_marine_group_FJ820373   | 0.00 | 0.00 | 0.14 |
| Bacteroidetes          | f__Saprosiraceae_JN391687          | 0.00 | 0.00 | 0.14 |
| Firmicutes             | Lactobacillus                      | 0.10 | 0.02 | 0.03 |
| Actinobacteria         | f__Intrasporangiaceae_AF408957     | 0.08 | 0.05 | 0.01 |
| Proteobacteria         | Diaphorobacter                     | 0.02 | 0.11 | 0.00 |
| Bacteroidetes          | o__Sphingobacteriales_novel_OTU37  | 0.00 | 0.04 | 0.09 |
| Lentisphaerae          | c__PBS-III-20_novel_OTU59          | 0.00 | 0.04 | 0.09 |
| Bacteroidetes          | o__Sphingobacteriales_EU104024     | 0.00 | 0.00 | 0.13 |
| Proteobacteria         | f__Comamonadaceae_HQ158715         | 0.00 | 0.00 | 0.13 |
| Proteobacteria         | spb280                             | 0.01 | 0.04 | 0.08 |
| Proteobacteria         | Chelatococcus                      | 0.00 | 0.05 | 0.08 |
| Bacteroidetes          | Owenweeksia                        | 0.00 | 0.01 | 0.12 |
| Proteobacteria         | f__Rickettsiaceae_LC004724         | 0.00 | 0.01 | 0.12 |
| Firmicutes             | Succiniclasticum                   | 0.09 | 0.04 | 0.00 |
| Saccharibacteria       | p__Saccharibacteria_novel_OTU25    | 0.00 | 0.11 | 0.01 |
| Candidate division SR1 | p__Candidate division SR1_JF917289 | 0.01 | 0.06 | 0.05 |
| Proteobacteria         | B63                                | 0.00 | 0.07 | 0.05 |
| Saccharibacteria       | p__Saccharibacteria_novel_OTU61    | 0.00 | 0.07 | 0.05 |
| Actinobacteria         | f__PeM15_EU104254                  | 0.03 | 0.05 | 0.04 |
| Synergistetes          | Anaerobaculum                      | 0.00 | 0.03 | 0.09 |
| Proteobacteria         | Ideonella                          | 0.01 | 0.07 | 0.04 |
| Proteobacteria         | Xenophilus                         | 0.01 | 0.07 | 0.04 |
| Proteobacteria         | f__Comamonadaceae_AF097797         | 0.00 | 0.08 | 0.04 |
| Unassigned             | Unassigned; novel_OTU139           | 0.03 | 0.02 | 0.07 |
| Bacteroidetes          | c__WCHB1-32_JX225892               | 0.00 | 0.00 | 0.12 |
| Proteobacteria         | f__Comamonadaceae_KJ147073         | 0.00 | 0.00 | 0.12 |
| Proteobacteria         | f__Comamonadaceae_FJ820468         | 0.00 | 0.05 | 0.07 |
| Proteobacteria         | Enterobacter                       | 0.00 | 0.05 | 0.07 |
| Bacteroidetes          | f__Draconibacteriaceae_HQ703849    | 0.00 | 0.06 | 0.05 |
| Firmicutes             | Holdemanella                       | 0.09 | 0.00 | 0.03 |

|                  |                                   |      |      |      |
|------------------|-----------------------------------|------|------|------|
| Bacteroidetes    | f_env.OPS_17_HQ111163             | 0.00 | 0.02 | 0.09 |
| Firmicutes       | Lachnoclostridium                 | 0.08 | 0.01 | 0.03 |
| Verrucomicrobia  | f_Verrucomicrobiaceae_novel OTU47 | 0.01 | 0.07 | 0.03 |
| Proteobacteria   | f_Beijerinckiaceae_CU919262       | 0.01 | 0.03 | 0.07 |
| Proteobacteria   | Nannocystis                       | 0.00 | 0.04 | 0.07 |
| Proteobacteria   | Kaistia                           | 0.06 | 0.04 | 0.00 |
| Unassigned       | Unassigned; novel OTU28           | 0.00 | 0.00 | 0.10 |
| Lentisphaerae    | c_PBS-III-20_novel OTU49          | 0.00 | 0.00 | 0.10 |
| Proteobacteria   | Caulobacter                       | 0.01 | 0.08 | 0.01 |
| Actinobacteria   | f_Propionibacteriaceae_HM264006   | 0.03 | 0.07 | 0.00 |
| Bacteroidetes    | c_WCHB1-32_AB244310               | 0.00 | 0.05 | 0.05 |
| Proteobacteria   | Steroidobacter                    | 0.00 | 0.05 | 0.05 |
| Proteobacteria   | f_Bradyrhizobiaceae_HE576382      | 0.03 | 0.03 | 0.04 |
| Saccharibacteria | p_Saccharibacteria_KF771444       | 0.08 | 0.00 | 0.03 |
| Actinobacteria   | Micropruina                       | 0.04 | 0.03 | 0.03 |
| Firmicutes       | Fusicatenibacter                  | 0.09 | 0.00 | 0.01 |
| Proteobacteria   | f_Comamonadaceae_JX402118         | 0.00 | 0.02 | 0.08 |
| Proteobacteria   | Zymomonas                         | 0.01 | 0.06 | 0.03 |
| Actinobacteria   | f_Microthricaceae_EU104265        | 0.00 | 0.07 | 0.03 |
| Proteobacteria   | f_Comamonadaceae_KF441631         | 0.01 | 0.02 | 0.07 |
| Firmicutes       | Catenibacterium                   | 0.09 | 0.01 | 0.00 |
| Bacteroidetes    | G35_D8                            | 0.03 | 0.05 | 0.01 |
| Chlamydiae       | Candidatus Protochlamydia         | 0.03 | 0.05 | 0.01 |
| Proteobacteria   | o_Oligoflexales_JN038860          | 0.03 | 0.05 | 0.01 |
| Bacteroidetes    | f_Chitinophagaceae_HM129278       | 0.00 | 0.00 | 0.09 |
| Bacteroidetes    | f_NS11-12 marine group_HM921142   | 0.00 | 0.00 | 0.09 |
| Unassigned       | Unassigned; novel OTU55           | 0.00 | 0.00 | 0.09 |
| Unassigned       | Unassigned; novel OTU706          | 0.00 | 0.00 | 0.09 |
| Proteobacteria   | f_Comamonadaceae_JX966536         | 0.01 | 0.08 | 0.00 |
| Proteobacteria   | Phreatobacter                     | 0.02 | 0.03 | 0.04 |
| Gracilibacteria  | p_Gracilibacteria_HQ860703        | 0.00 | 0.09 | 0.00 |
| Proteobacteria   | Uruburuella                       | 0.01 | 0.04 | 0.04 |
| Proteobacteria   | f_Comamonadaceae_KM016257         | 0.00 | 0.05 | 0.04 |
| Proteobacteria   | FukuS110                          | 0.00 | 0.05 | 0.04 |
| Saccharibacteria | p_Saccharibacteria_LN561157       | 0.00 | 0.05 | 0.04 |
| Firmicutes       | Dorea                             | 0.03 | 0.03 | 0.03 |
| Proteobacteria   | Haematobacter                     | 0.03 | 0.03 | 0.03 |
| Proteobacteria   | f_Comamonadaceae_JQ323104         | 0.00 | 0.01 | 0.08 |
| Actinobacteria   | f_Propionibacteriaceae_EU104308   | 0.02 | 0.04 | 0.03 |
| Proteobacteria   | Hirschia                          | 0.00 | 0.06 | 0.03 |
| Actinobacteria   | f_Microthricaceae_HM007549        | 0.00 | 0.07 | 0.01 |
| Proteobacteria   | Sphingomonas                      | 0.00 | 0.07 | 0.01 |
| Chloroflexi      | f_Anaerolineaceae_CU466712        | 0.00 | 0.03 | 0.05 |
| Proteobacteria   | Thauera                           | 0.00 | 0.03 | 0.05 |
| Chloroflexi      | Kouleothrix                       | 0.01 | 0.07 | 0.00 |
| Saccharibacteria | p_Saccharibacteria_AF507686       | 0.01 | 0.07 | 0.00 |
| Proteobacteria   | f_Comamonadaceae_AF508103         | 0.01 | 0.03 | 0.04 |
| Actinobacteria   | Actinomyces                       | 0.05 | 0.00 | 0.03 |
| Bacteroidetes    | f_Draconibacteriaceae_FN824888    | 0.00 | 0.04 | 0.04 |
| Unassigned       | Unassigned; novel OTU73           | 0.00 | 0.04 | 0.04 |
| Verrucomicrobia  | f_Verrucomicrobiaceae_novel OTU38 | 0.03 | 0.02 | 0.03 |
| Bacteroidetes    | Phaeodactylibacter                | 0.00 | 0.00 | 0.08 |
| Unassigned       | Unassigned; novel OTU67           | 0.00 | 0.00 | 0.08 |
| Proteobacteria   | f_mle1-27_novel OTU26             | 0.00 | 0.00 | 0.08 |
| Proteobacteria   | f_Moraxellaceae_KF891388          | 0.00 | 0.00 | 0.08 |
| Fusobacteria     | f_Leptotrichiaceae_JX040374       | 0.02 | 0.03 | 0.03 |
| Cyanobacteria    | c_ML635J-21_novel OTU39           | 0.01 | 0.04 | 0.03 |
| Atribacteria     | HAW-R60                           | 0.05 | 0.01 | 0.01 |
| Bacteroidetes    | f_Saprosiraceae_novel OTU27       | 0.00 | 0.05 | 0.03 |

|                  |                                      |      |      |      |
|------------------|--------------------------------------|------|------|------|
| Proteobacteria   | Limnohabitans                        | 0.04 | 0.02 | 0.01 |
| Proteobacteria   | f__Comamonadaceae_JQ724322           | 0.03 | 0.03 | 0.01 |
| Proteobacteria   | o__Myxococcales_KJ783121             | 0.00 | 0.01 | 0.07 |
| Actinobacteria   | Aeromicrobium                        | 0.08 | 0.00 | 0.00 |
| Unassigned       | Unassigned; novel OTU71              | 0.08 | 0.00 | 0.00 |
| Proteobacteria   | f__Burkholderiaceae_LN569635         | 0.01 | 0.05 | 0.01 |
| Actinobacteria   | Austwickia                           | 0.00 | 0.06 | 0.01 |
| Firmicutes       | f__Acidaminococcaceae_GQ406188       | 0.00 | 0.06 | 0.01 |
| Acidobacteria    | Bryobacter                           | 0.00 | 0.02 | 0.05 |
| Bacteroidetes    | f__Chitinophagaceae_JN609315         | 0.00 | 0.02 | 0.05 |
| Proteobacteria   | o__DB1-14_AB473970                   | 0.00 | 0.02 | 0.05 |
| Saccharibacteria | p__Saccharibacteria_EU104273         | 0.01 | 0.06 | 0.00 |
| Verrucomicrobia  | f__FukuN18_freshwater_group_AB630657 | 0.02 | 0.01 | 0.04 |
| Unassigned       | Unassigned; novel OTU79              | 0.00 | 0.07 | 0.00 |
| Bacteroidetes    | Microbacter                          | 0.00 | 0.03 | 0.04 |
| Proteobacteria   | f__7B-8_JN245869                     | 0.00 | 0.03 | 0.04 |
| Proteobacteria   | f__Bradyrhizobiaceae_JQ923574        | 0.01 | 0.03 | 0.03 |
| Proteobacteria   | 32C6                                 | 0.00 | 0.04 | 0.03 |
| Proteobacteria   | f__Comamonadaceae_FQ658779           | 0.00 | 0.04 | 0.03 |
| Proteobacteria   | Limnobacter                          | 0.00 | 0.04 | 0.03 |
| Proteobacteria   | Piscinibacter                        | 0.00 | 0.04 | 0.03 |
| Actinobacteria   | f__Propionibacteriaceae_FR874241     | 0.04 | 0.01 | 0.01 |
| Proteobacteria   | f__Alcaligenaceae_novel_OTU82        | 0.03 | 0.02 | 0.01 |
| Bacteroidetes    | f__Chitinophagaceae_EU104008         | 0.00 | 0.00 | 0.07 |
| Firmicutes       | f__MBA03_EF585997                    | 0.00 | 0.00 | 0.07 |
| Unassigned       | Unassigned; novel OTU41              | 0.00 | 0.00 | 0.07 |
| Unassigned       | Unassigned; novel OTU599             | 0.00 | 0.00 | 0.07 |
| Unassigned       | Unassigned; novel OTU62              | 0.00 | 0.00 | 0.07 |
| Proteobacteria   | f__Rhodocyclaceae_GX154053           | 0.00 | 0.00 | 0.07 |
| Proteobacteria   | f__Rickettsiaceae_novel_OTU347       | 0.00 | 0.00 | 0.07 |
| Unassigned       | Unassigned; novel OTU30              | 0.02 | 0.03 | 0.01 |
| Proteobacteria   | Pseudorhodiferax                     | 0.02 | 0.03 | 0.01 |
| Verrucomicrobia  | f__Verrucomicrobiaceae_HM332293      | 0.06 | 0.00 | 0.00 |
| Firmicutes       | [Ruminococcus] gauvreauii group      | 0.05 | 0.01 | 0.00 |
| Proteobacteria   | f__Comamonadaceae_EF626687           | 0.00 | 0.05 | 0.01 |
| Actinobacteria   | Atopobium                            | 0.04 | 0.02 | 0.00 |
| Actinobacteria   | f__Propionibacteriaceae_EF688211     | 0.04 | 0.02 | 0.00 |
| Actinobacteria   | Nakamurella                          | 0.04 | 0.02 | 0.00 |
| Firmicutes       | Acidaminococcus                      | 0.04 | 0.02 | 0.00 |
| Firmicutes       | Ruminococcaceae_UCG-002              | 0.04 | 0.02 | 0.00 |
| Hydrogenedentes  | p__Hydrogenedentes_KJ783078          | 0.00 | 0.01 | 0.05 |
| Proteobacteria   | Acidocella                           | 0.00 | 0.01 | 0.05 |
| Proteobacteria   | Denitratisoma                        | 0.00 | 0.01 | 0.05 |
| Proteobacteria   | Rivicola                             | 0.00 | 0.01 | 0.05 |
| Proteobacteria   | f__A0839_novel_OTU14                 | 0.02 | 0.04 | 0.00 |
| Saccharibacteria | Candidatus Saccharimonas             | 0.01 | 0.05 | 0.00 |
| Saccharibacteria | p__Saccharibacteria_AF513103         | 0.02 | 0.00 | 0.04 |
| Actinobacteria   | Streptomyces                         | 0.00 | 0.06 | 0.00 |
| Unassigned       | Unassigned; novel OTU24              | 0.00 | 0.06 | 0.00 |
| Unassigned       | Unassigned; novel OTU58              | 0.00 | 0.06 | 0.00 |
| Proteobacteria   | f__Alcaligenaceae_KC189690           | 0.01 | 0.01 | 0.04 |
| Actinobacteria   | o__Micrococcales_AF226615            | 0.00 | 0.02 | 0.04 |
| Proteobacteria   | f__Neisseriaceae_CU927875            | 0.00 | 0.02 | 0.04 |
| Proteobacteria   | f__Sandaracinaceae_KF697431          | 0.00 | 0.02 | 0.04 |
| Proteobacteria   | Phaselicystis                        | 0.00 | 0.02 | 0.04 |
| Bacteroidetes    | Chitinophaga                         | 0.01 | 0.02 | 0.03 |
| Proteobacteria   | Xanthobacter                         | 0.01 | 0.02 | 0.03 |
| Bacteroidetes    | f__AKYH767_CU466748                  | 0.00 | 0.03 | 0.03 |
| Proteobacteria   | Bradyrhizobium                       | 0.00 | 0.03 | 0.03 |

|                                    |                                           |      |      |      |
|------------------------------------|-------------------------------------------|------|------|------|
| Proteobacteria                     | M05-Pitesti                               | 0.00 | 0.03 | 0.03 |
| Proteobacteria                     | o__DB1-14_novel OTU665                    | 0.00 | 0.03 | 0.03 |
| Proteobacteria                     | Ralstonia                                 | 0.00 | 0.03 | 0.03 |
| Firmicutes                         | Lachnospiraceae NK3A20 group              | 0.04 | 0.00 | 0.01 |
| Firmicutes                         | Coprococcus 3                             | 0.03 | 0.01 | 0.01 |
| Actinobacteria                     | f__Microbacteriaceae_HM265249             | 0.02 | 0.02 | 0.01 |
| Firmicutes                         | f__Lachnospiraceae_GU559776               | 0.02 | 0.02 | 0.01 |
| Proteobacteria                     | f__Rhodobacteraceae_AB727354              | 0.02 | 0.02 | 0.01 |
| Verrucomicrobia                    | f__Verrucomicrobiaceae_novel OTU721       | 0.02 | 0.02 | 0.01 |
| Proteobacteria                     | Nitrobacter                               | 0.01 | 0.03 | 0.01 |
| Proteobacteria                     | Legionella                                | 0.05 | 0.00 | 0.00 |
| Actinobacteria                     | f__Intrasporangiaceae_novel OTU60         | 0.00 | 0.04 | 0.01 |
| Proteobacteria                     | f__Comamonadaceae_KM462134                | 0.00 | 0.04 | 0.01 |
| Saccharibacteria                   | p__Saccharibacteria_novel OTU66           | 0.04 | 0.01 | 0.00 |
| Bacteroidetes                      | f__Chitinophagaceae_FJ546396              | 0.00 | 0.00 | 0.05 |
| Bacteroidetes                      | f__Chitinophagaceae_novel OTU697          | 0.00 | 0.00 | 0.05 |
| Bacteroidetes                      | f__NS11-12 marine group_JQ072894          | 0.00 | 0.00 | 0.05 |
| Bacteroidetes                      | o__Sphingobacteriales_HQ324879            | 0.00 | 0.00 | 0.05 |
| Unassigned                         | Unassigned; novel OTU100                  | 0.00 | 0.00 | 0.05 |
| Unassigned                         | Unassigned; novel OTU342                  | 0.00 | 0.00 | 0.05 |
| Unassigned                         | Unassigned; novel OTU742                  | 0.00 | 0.00 | 0.05 |
| Miscellaneous Crenarchaeotic Group | p__Misc Crenarchaeotic Group_novel OTU579 | 0.00 | 0.00 | 0.05 |
| Proteobacteria                     | c__Gammaproteobacteria_EU104106           | 0.00 | 0.00 | 0.05 |
| Proteobacteria                     | Methylobacter                             | 0.00 | 0.00 | 0.05 |
| Firmicutes                         | Eubacterium                               | 0.01 | 0.04 | 0.00 |
| Bacteroidetes                      | f__Saprosiraceae_novel OTU72              | 0.00 | 0.05 | 0.00 |
| Proteobacteria                     | f__SD04E11_FM875685                       | 0.00 | 0.05 | 0.00 |
| Proteobacteria                     | o__Oligoflexales_KJ782866                 | 0.00 | 0.05 | 0.00 |
| Proteobacteria                     | o__Oligoflexales_novel OTU15              | 0.00 | 0.05 | 0.00 |
| Proteobacteria                     | Rhizomicrobium                            | 0.00 | 0.05 | 0.00 |
| Verrucomicrobia                    | f__Verrucomicrobiaceae_novel OTU497       | 0.00 | 0.05 | 0.00 |
| Bacteroidetes                      | c__WCHB1-32_FR667843                      | 0.00 | 0.01 | 0.04 |
| Bacteroidetes                      | f__Saprosiraceae_EU104080                 | 0.00 | 0.01 | 0.04 |
| Proteobacteria                     | f__Comamonadaceae_HQ385603                | 0.00 | 0.01 | 0.04 |
| Proteobacteria                     | f__Comamonadaceae_KF441660                | 0.00 | 0.01 | 0.04 |
| Proteobacteria                     | Paucimonas                                | 0.00 | 0.01 | 0.04 |
| Proteobacteria                     | Propionivibrio                            | 0.00 | 0.01 | 0.04 |
| Bacteroidetes                      | f__Chitinophagaceae_novel OTU807          | 0.00 | 0.02 | 0.03 |
| Bacteroidetes                      | f__env.OPS 17_JQ941821                    | 0.00 | 0.02 | 0.03 |
| Cyanobacteria                      | c__ML635J-21_novel OTU178                 | 0.00 | 0.02 | 0.03 |
| Unassigned                         | Unassigned; novel OTU817                  | 0.00 | 0.02 | 0.03 |
| Proteobacteria                     | f__Comamonadaceae_HE993549                | 0.00 | 0.02 | 0.03 |
| Proteobacteria                     | f__Comamonadaceae_HQ232436                | 0.00 | 0.02 | 0.03 |
| Proteobacteria                     | f__Rhodobacteraceae_HM129109              | 0.00 | 0.02 | 0.03 |
| Actinobacteria                     | Phycoccus                                 | 0.03 | 0.00 | 0.01 |
| Chloroflexi                        | o__JG30-KF-CM45_JQ624352                  | 0.03 | 0.00 | 0.01 |
| Firmicutes                         | Acetobacterium                            | 0.03 | 0.00 | 0.01 |
| Firmicutes                         | Ruminococcaceae UCG-013                   | 0.03 | 0.00 | 0.01 |
| Unassigned                         | Unassigned; novel OTU11                   | 0.03 | 0.00 | 0.01 |
| Chloroflexi                        | o__JG30-KF-CM45_HM316086                  | 0.02 | 0.01 | 0.01 |
| Firmicutes                         | Coprothermobacter                         | 0.02 | 0.01 | 0.01 |
| Proteobacteria                     | Methylocapsa                              | 0.02 | 0.01 | 0.01 |
| Verrucomicrobia                    | Verrucomicrobium                          | 0.02 | 0.01 | 0.01 |
| Proteobacteria                     | Methylobacterium                          | 0.01 | 0.02 | 0.01 |
| Actinobacteria                     | Actinotignum                              | 0.00 | 0.03 | 0.01 |
| Firmicutes                         | Veillonella                               | 0.00 | 0.03 | 0.01 |
| Gracilibacteria                    | p__Gracilibacteria_HQ860702               | 0.00 | 0.03 | 0.01 |
| Proteobacteria                     | f__Comamonadaceae_AB200293                | 0.00 | 0.03 | 0.01 |
| Verrucomicrobia                    | f__Verrucomicrobiaceae_HQ118308           | 0.00 | 0.03 | 0.01 |



|                        |                                   |      |      |      |
|------------------------|-----------------------------------|------|------|------|
| Actinobacteria         | o_Micrococcales_CU925140          | 0.03 | 0.01 | 0.00 |
| Firmicutes             | Enterococcus                      | 0.03 | 0.01 | 0.00 |
| Firmicutes             | o_Selenomonadales_AB806235        | 0.03 | 0.01 | 0.00 |
| Proteobacteria         | Tabrizicola                       | 0.03 | 0.01 | 0.00 |
| Firmicutes             | Megasphaera                       | 0.02 | 0.02 | 0.00 |
| Verrucomicrobia        | f_Verrucomicrobiaceae_KF071300    | 0.02 | 0.02 | 0.00 |
| Actinobacteria         | Tessaracoccus                     | 0.01 | 0.03 | 0.00 |
| Proteobacteria         | Nitratireductor                   | 0.01 | 0.03 | 0.00 |
| Proteobacteria         | o_Oligoflexales_novel OTU591      | 0.01 | 0.03 | 0.00 |
| Proteobacteria         | Rhizobacter                       | 0.01 | 0.03 | 0.00 |
| Verrucomicrobia        | Akkermansia                       | 0.01 | 0.03 | 0.00 |
| Verrucomicrobia        | f_Verrucomicrobiaceae_HM329157    | 0.01 | 0.03 | 0.00 |
| Actinobacteria         | f_Microthricaceae_AY743693        | 0.00 | 0.04 | 0.00 |
| Bacteroidetes          | f_Cytophagaceae_novel OTU76       | 0.00 | 0.04 | 0.00 |
| Unassigned             | Unassigned; novel OTU51           | 0.00 | 0.04 | 0.00 |
| Unassigned             | Unassigned; novel OTU57           | 0.00 | 0.04 | 0.00 |
| Unassigned             | Unassigned; novel OTU585          | 0.00 | 0.04 | 0.00 |
| Bacteroidetes          | c_WCHB1-32_JQ723616               | 0.00 | 0.00 | 0.04 |
| Bacteroidetes          | Cytophaga                         | 0.00 | 0.00 | 0.04 |
| Bacteroidetes          | f_Chitinophagaceae_novel OTU19    | 0.00 | 0.00 | 0.04 |
| Bacteroidetes          | f_Chitinophagaceae_novel OTU74    | 0.00 | 0.00 | 0.04 |
| Bacteroidetes          | f_Draconibacteriaceae_KM410485    | 0.00 | 0.00 | 0.04 |
| Bacteroidetes          | f_NS11-12 marine group_FJ546404   | 0.00 | 0.00 | 0.04 |
| Bacteroidetes          | Rikenellaceae RC9 gut group       | 0.00 | 0.00 | 0.04 |
| Chlamydiae             | o_Chlamydiales_novel OTU343       | 0.00 | 0.00 | 0.04 |
| Firmicutes             | Anaerosinus                       | 0.00 | 0.00 | 0.04 |
| Fusobacteria           | f_Leptotrichiaceae_KC432497       | 0.00 | 0.00 | 0.04 |
| Gracilibacteria        | p_Gracilibacteria_novel OTU107    | 0.00 | 0.00 | 0.04 |
| Unassigned             | Unassigned; novel OTU21           | 0.00 | 0.00 | 0.04 |
| Unassigned             | Unassigned; novel OTU40           | 0.00 | 0.00 | 0.04 |
| Unassigned             | Unassigned; novel OTU54           | 0.00 | 0.00 | 0.04 |
| Unassigned             | Unassigned; novel OTU81           | 0.00 | 0.00 | 0.04 |
| Unassigned             | Unassigned; novel OTU86           | 0.00 | 0.00 | 0.04 |
| Parcubacteria          | p_Parcubacteria_novel OTU811      | 0.00 | 0.00 | 0.04 |
| Proteobacteria         | Alkanindiges                      | 0.00 | 0.00 | 0.04 |
| Proteobacteria         | Desulfomicrobium                  | 0.00 | 0.00 | 0.04 |
| Proteobacteria         | f_mle1-27_AB286342                | 0.00 | 0.00 | 0.04 |
| Proteobacteria         | f_Rhodocyclaceae_AF245350         | 0.00 | 0.00 | 0.04 |
| Proteobacteria         | f_TK34_novel OTU175               | 0.00 | 0.00 | 0.04 |
| Proteobacteria         | o_DB1-14_novel OTU1084            | 0.00 | 0.00 | 0.04 |
| Proteobacteria         | Sphaerotilus                      | 0.00 | 0.00 | 0.04 |
| Saccharibacteria       | p_Saccharibacteria_JQ191024       | 0.00 | 0.00 | 0.04 |
| Candidate division SR1 | p_Candidate division SR1_JF917292 | 0.01 | 0.00 | 0.03 |
| Firmicutes             | A55_D21                           | 0.01 | 0.00 | 0.03 |
| Proteobacteria         | f_Comamonadaceae_HQ462550         | 0.01 | 0.00 | 0.03 |
| Saccharibacteria       | p_Saccharibacteria_HQ132439       | 0.01 | 0.00 | 0.03 |
| Bacteroidetes          | c_WCHB1-32_FM204957               | 0.00 | 0.01 | 0.03 |
| Bacteroidetes          | c_WCHB1-32_HM141872               | 0.00 | 0.01 | 0.03 |
| Bacteroidetes          | Emticia                           | 0.00 | 0.01 | 0.03 |
| Firmicutes             | Phascolarctobacterium             | 0.00 | 0.01 | 0.03 |
| Proteobacteria         | f_Comamonadaceae_DQ104935         | 0.00 | 0.01 | 0.03 |
| Proteobacteria         | f_Moraxellaceae_novel OTU78       | 0.00 | 0.01 | 0.03 |
| Proteobacteria         | f_SM2D12_HM278276                 | 0.00 | 0.01 | 0.03 |
| Saccharibacteria       | p_Saccharibacteria_KM046964       | 0.00 | 0.01 | 0.03 |
| SHA-109                | p_SHA-109_KJ783033                | 0.00 | 0.01 | 0.03 |
| Actinobacteria         | f_Actinomycetaceae_HM008736       | 0.02 | 0.00 | 0.01 |
| Proteobacteria         | Aminobacter                       | 0.02 | 0.00 | 0.01 |
| Proteobacteria         | f_Beijerinckiaceae_KJ191883       | 0.02 | 0.00 | 0.01 |
| Proteobacteria         | f_Rhodospirillaceae_novel OTU350  | 0.02 | 0.00 | 0.01 |

|                  |                                 |      |      |      |
|------------------|---------------------------------|------|------|------|
| Saccharibacteria | p_Saccharibacteria_novel OTU888 | 0.02 | 0.00 | 0.01 |
| Proteobacteria   | f_Rhodocyclaceae_LN569631       | 0.01 | 0.01 | 0.01 |
| Saccharibacteria | p_Saccharibacteria_novel OTU954 | 0.01 | 0.01 | 0.01 |
| Actinobacteria   | o_Acidimicrobiales_novel OTU159 | 0.00 | 0.02 | 0.01 |
| Bacteroidetes    | f_LiUU-11-161_AY509379          | 0.00 | 0.02 | 0.01 |
| Firmicutes       | f_Syntrophomonadaceae_EF559046  | 0.00 | 0.02 | 0.01 |
| Fusobacteria     | Sebaldella                      | 0.00 | 0.02 | 0.01 |
| Proteobacteria   | f_A0839_JQ318951                | 0.00 | 0.02 | 0.01 |
| Proteobacteria   | o_Sphingomonadales_JQ408099     | 0.00 | 0.02 | 0.01 |
| Proteobacteria   | Rubellimicrobium                | 0.00 | 0.02 | 0.01 |
| Proteobacteria   | sipK9                           | 0.00 | 0.02 | 0.01 |
| Actinobacteria   | f_Actinomycetaceae_FJ542912     | 0.03 | 0.00 | 0.00 |
| Actinobacteria   | Luteococcus                     | 0.03 | 0.00 | 0.00 |
| Chloroflexi      | o_JG30-KF-CM45_CU920279         | 0.03 | 0.00 | 0.00 |
| Planctomycetes   | f_Planctomycetaceae_FN436058    | 0.03 | 0.00 | 0.00 |
| Proteobacteria   | Rhodovarius                     | 0.03 | 0.00 | 0.00 |
| Saccharibacteria | p_Saccharibacteria_CU466685     | 0.03 | 0.00 | 0.00 |
| Firmicutes       | [Eubacterium] hallii group      | 0.02 | 0.01 | 0.00 |
| Firmicutes       | f_Lachnospiraceae_novel OTU110  | 0.02 | 0.01 | 0.00 |
| Firmicutes       | Ruminococcaceae_NK4A214 group   | 0.02 | 0.01 | 0.00 |
| Proteobacteria   | f_Bradyrhizobiaceae_AB486220    | 0.02 | 0.01 | 0.00 |
| Actinobacteria   | f_Nocardioidaceae_AB166779      | 0.01 | 0.02 | 0.00 |
| Bacteroidetes    | Flavisolibacter                 | 0.01 | 0.02 | 0.00 |
| Proteobacteria   | f_Comamonadaceae_JX971553       | 0.01 | 0.02 | 0.00 |
| Proteobacteria   | MWH-UniP1 aquatic group         | 0.01 | 0.02 | 0.00 |
| Saccharibacteria | p_Saccharibacteria_AF268998     | 0.01 | 0.02 | 0.00 |
| Saccharibacteria | p_Saccharibacteria_novel OTU864 | 0.01 | 0.02 | 0.00 |
| Bacteroidetes    | f_Chitinophagaceae_AJ575722     | 0.00 | 0.03 | 0.00 |
| Bacteroidetes    | f_env.OPS 17_JN090811           | 0.00 | 0.03 | 0.00 |
| Firmicutes       | f_Lachnospiraceae_HM445969      | 0.00 | 0.03 | 0.00 |
| Unassigned       | Unassigned; novel OTU447        | 0.00 | 0.03 | 0.00 |
| Unassigned       | Unassigned; novel OTU75         | 0.00 | 0.03 | 0.00 |
| Planctomycetes   | Singulisphaera                  | 0.00 | 0.03 | 0.00 |
| Proteobacteria   | c_TA18_novel OTU202             | 0.00 | 0.03 | 0.00 |
| Proteobacteria   | f_Rhodobacteraceae_KC189683     | 0.00 | 0.03 | 0.00 |
| Proteobacteria   | f_Rhodocyclaceae_GQ844369       | 0.00 | 0.03 | 0.00 |
| Proteobacteria   | f_Sphingomonadaceae_HQ436496    | 0.00 | 0.03 | 0.00 |
| Proteobacteria   | o_NKB5_EU335403                 | 0.00 | 0.03 | 0.00 |
| Proteobacteria   | o_Oligoflexales_novel OTU84     | 0.00 | 0.03 | 0.00 |
| Proteobacteria   | o_Xanthomonadales_LN570602      | 0.00 | 0.03 | 0.00 |
| Saccharibacteria | p_Saccharibacteria_novel OTU391 | 0.00 | 0.03 | 0.00 |
| Saccharibacteria | p_Saccharibacteria_novel OTU43  | 0.00 | 0.03 | 0.00 |
| Verrucomicrobia  | f_Verrucomicrobiaceae_AB247484  | 0.00 | 0.03 | 0.00 |
| Actinobacteria   | Brooklawnia                     | 0.00 | 0.00 | 0.03 |
| Actinobacteria   | o_Frankiales_GQ017242           | 0.00 | 0.00 | 0.03 |
| Actinobacteria   | Rhodococcus                     | 0.00 | 0.00 | 0.03 |
| Bacteroidetes    | Bacteroides                     | 0.00 | 0.00 | 0.03 |
| Bacteroidetes    | Bergeyella                      | 0.00 | 0.00 | 0.03 |
| Bacteroidetes    | c_WCHB1-32_FQ660068             | 0.00 | 0.00 | 0.03 |
| Bacteroidetes    | f_Chitinophagaceae_JN541148     | 0.00 | 0.00 | 0.03 |
| Bacteroidetes    | f_Chitinophagaceae_LK392925     | 0.00 | 0.00 | 0.03 |
| Bacteroidetes    | f_Chitinophagaceae_novel OTU261 | 0.00 | 0.00 | 0.03 |
| Bacteroidetes    | f_Chitinophagaceae_novel OTU529 | 0.00 | 0.00 | 0.03 |
| Bacteroidetes    | f_Chitinophagaceae_novel OTU948 | 0.00 | 0.00 | 0.03 |
| Bacteroidetes    | f_env.OPS 17_novel OTU943       | 0.00 | 0.00 | 0.03 |
| Bacteroidetes    | f_WCHB1-69_novel OTU494         | 0.00 | 0.00 | 0.03 |
| Fibrobacteres    | f_Fibrobacteraceae_novel OTU259 | 0.00 | 0.00 | 0.03 |
| Firmicutes       | Acetoanaerobium                 | 0.00 | 0.00 | 0.03 |
| Firmicutes       | Bacillus                        | 0.00 | 0.00 | 0.03 |

|                  |                                   |      |      |      |
|------------------|-----------------------------------|------|------|------|
| Firmicutes       | f_Lachnospiraceae_JX000043        | 0.00 | 0.00 | 0.03 |
| Firmicutes       | Fastidiosipila                    | 0.00 | 0.00 | 0.03 |
| Firmicutes       | Oscillibacter                     | 0.00 | 0.00 | 0.03 |
| Firmicutes       | Proteinielasticum                 | 0.00 | 0.00 | 0.03 |
| Firmicutes       | Ruminococcaceae_UCG-014           | 0.00 | 0.00 | 0.03 |
| Hydrogenedentes  | p_Hydrogenedentes_FM213068        | 0.00 | 0.00 | 0.03 |
| Unassigned       | Unassigned; novel OTU221          | 0.00 | 0.00 | 0.03 |
| Unassigned       | Unassigned; novel OTU323          | 0.00 | 0.00 | 0.03 |
| Unassigned       | Unassigned; novel OTU45           | 0.00 | 0.00 | 0.03 |
| Unassigned       | Unassigned; novel OTU70           | 0.00 | 0.00 | 0.03 |
| Parcubacteria    | p_Parcubacteria_JX105635          | 0.00 | 0.00 | 0.03 |
| Proteobacteria   | c_SPOTSOCT00m83_JF703353          | 0.00 | 0.00 | 0.03 |
| Proteobacteria   | f_Comamonadaceae_AB672262         | 0.00 | 0.00 | 0.03 |
| Proteobacteria   | f_Comamonadaceae_GQ008889         | 0.00 | 0.00 | 0.03 |
| Proteobacteria   | f_Comamonadaceae_JF681702         | 0.00 | 0.00 | 0.03 |
| Proteobacteria   | f_Comamonadaceae_JN128637         | 0.00 | 0.00 | 0.03 |
| Proteobacteria   | f_Comamonadaceae_KC286830         | 0.00 | 0.00 | 0.03 |
| Proteobacteria   | f_Comamonadaceae_KM035965         | 0.00 | 0.00 | 0.03 |
| Proteobacteria   | f_Competibacteraceae_novel OTU698 | 0.00 | 0.00 | 0.03 |
| Proteobacteria   | f_Competibacteraceae_novel OTU833 | 0.00 | 0.00 | 0.03 |
| Proteobacteria   | f_mle1-27_novel OTU642            | 0.00 | 0.00 | 0.03 |
| Proteobacteria   | f_Rhodobacteraceae_CU922876       | 0.00 | 0.00 | 0.03 |
| Proteobacteria   | f_Rhodocyclaceae_KC357950         | 0.00 | 0.00 | 0.03 |
| Proteobacteria   | f_Rhodospirillaceae_KC551763      | 0.00 | 0.00 | 0.03 |
| Proteobacteria   | o_B1-7BS_EU104237                 | 0.00 | 0.00 | 0.03 |
| Proteobacteria   | Rickettsia                        | 0.00 | 0.00 | 0.03 |
| Saccharibacteria | p_Saccharibacteria_EU104337       | 0.00 | 0.00 | 0.03 |
| Saccharibacteria | p_Saccharibacteria_novel OTU1037  | 0.00 | 0.00 | 0.03 |
| Spirochaetae     | Turneriella                       | 0.00 | 0.00 | 0.03 |
| Actinobacteria   | Actinobaculum                     | 0.01 | 0.00 | 0.01 |
| Bacteroidetes    | f_Chitinophagaceae_EU177675       | 0.01 | 0.00 | 0.01 |
| Firmicutes       | Erysipelotrichaceae_UCG-003       | 0.01 | 0.00 | 0.01 |
| Firmicutes       | f_Family XI_HE650065              | 0.01 | 0.00 | 0.01 |
| Firmicutes       | Leuconostoc                       | 0.01 | 0.00 | 0.01 |
| Firmicutes       | Vagococcus                        | 0.01 | 0.00 | 0.01 |
| Unassigned       | Unassigned; novel OTU827          | 0.01 | 0.00 | 0.01 |
| Proteobacteria   | Citrobacter                       | 0.01 | 0.00 | 0.01 |
| Proteobacteria   | f_A0839_AF236002                  | 0.01 | 0.00 | 0.01 |
| Proteobacteria   | f_Rhodobacteraceae_GQ452286       | 0.01 | 0.00 | 0.01 |
| Synergistetes    | f_Synergistaceae_FJ375444         | 0.01 | 0.00 | 0.01 |
| Actinobacteria   | Olsenella                         | 0.00 | 0.01 | 0.01 |
| Bacteroidetes    | f_Chitinophagaceae_LN560252       | 0.00 | 0.01 | 0.01 |
| Bacteroidetes    | f_Saprospiraceae_HQ827970         | 0.00 | 0.01 | 0.01 |
| Bacteroidetes    | f_WCHB1-69_KM410799               | 0.00 | 0.01 | 0.01 |
| Bacteroidetes    | f_WCHB1-69_novel OTU874           | 0.00 | 0.01 | 0.01 |
| Firmicutes       | [Anaerorhabdus] furcosa group     | 0.00 | 0.01 | 0.01 |
| Firmicutes       | Family XIII AD3011 group          | 0.00 | 0.01 | 0.01 |
| Firmicutes       | Propionispira                     | 0.00 | 0.01 | 0.01 |
| Fusobacteria     | Leptotrichia                      | 0.00 | 0.01 | 0.01 |
| Planctomycetes   | c_vadinHA49_APMI01149768          | 0.00 | 0.01 | 0.01 |
| Proteobacteria   | Candidatus Odysella               | 0.00 | 0.01 | 0.01 |
| Proteobacteria   | Curvibacter                       | 0.00 | 0.01 | 0.01 |
| Proteobacteria   | Escherichia-Shigella              | 0.00 | 0.01 | 0.01 |
| Proteobacteria   | f_Comamonadaceae_AB516154         | 0.00 | 0.01 | 0.01 |
| Proteobacteria   | f_Comamonadaceae_AF143840         | 0.00 | 0.01 | 0.01 |
| Proteobacteria   | f_Comamonadaceae_GQ096191         | 0.00 | 0.01 | 0.01 |
| Proteobacteria   | f_Comamonadaceae_KC527620         | 0.00 | 0.01 | 0.01 |
| Proteobacteria   | f_Neisseriaceae_AY426973          | 0.00 | 0.01 | 0.01 |
| Proteobacteria   | f_Neisseriaceae_JF830238          | 0.00 | 0.01 | 0.01 |

|                        |                                       |      |      |      |
|------------------------|---------------------------------------|------|------|------|
| Proteobacteria         | f_Rhodocyclaceae_KC331484             | 0.00 | 0.01 | 0.01 |
| Proteobacteria         | Lampropedia                           | 0.00 | 0.01 | 0.01 |
| Proteobacteria         | o_DB1-14_JF203592                     | 0.00 | 0.01 | 0.01 |
| Proteobacteria         | o_DB1-14_novel OTU1006                | 0.00 | 0.01 | 0.01 |
| Proteobacteria         | o_DB1-14_novel OTU1080                | 0.00 | 0.01 | 0.01 |
| Proteobacteria         | o_Oligoflexales_novel OTU479          | 0.00 | 0.01 | 0.01 |
| Proteobacteria         | Sulfurospirillum                      | 0.00 | 0.01 | 0.01 |
| Saccharibacteria       | p_Saccharibacteria_GQ023532           | 0.00 | 0.01 | 0.01 |
| Saccharibacteria       | p_Saccharibacteria_novel OTU324       | 0.00 | 0.01 | 0.01 |
| Saccharibacteria       | p_Saccharibacteria_novel OTU393       | 0.00 | 0.01 | 0.01 |
| Saccharibacteria       | p_Saccharibacteria_novel OTU69        | 0.00 | 0.01 | 0.01 |
| Actinobacteria         | f_Coriobacteriaceae_novel OTU64       | 0.02 | 0.00 | 0.00 |
| Euryarchaeota          | Methanobacterium                      | 0.02 | 0.00 | 0.00 |
| Firmicutes             | Dialister                             | 0.02 | 0.00 | 0.00 |
| Saccharibacteria       | p_Saccharibacteria_novel OTU505       | 0.02 | 0.00 | 0.00 |
| Tenericutes            | o_Mollicutes RF9_EU843501             | 0.02 | 0.00 | 0.00 |
| Actinobacteria         | f_Intrasporangiaceae_EU090713         | 0.01 | 0.01 | 0.00 |
| Actinobacteria         | Senegalimassilia                      | 0.01 | 0.01 | 0.00 |
| Euryarchaeota          | Methanosphaera                        | 0.01 | 0.01 | 0.00 |
| Firmicutes             | Turcibacter                           | 0.01 | 0.01 | 0.00 |
| Unassigned             | Unassigned; novel OTU375              | 0.01 | 0.01 | 0.00 |
| Proteobacteria         | o_Rhizobiales_novel OTU222            | 0.01 | 0.01 | 0.00 |
| Saccharibacteria       | p_Saccharibacteria_HM262797           | 0.01 | 0.01 | 0.00 |
| Saccharibacteria       | p_Saccharibacteria_LN561154           | 0.01 | 0.01 | 0.00 |
| Saccharibacteria       | p_Saccharibacteria_novel OTU392       | 0.01 | 0.01 | 0.00 |
| Saccharibacteria       | p_Saccharibacteria_novel OTU918       | 0.01 | 0.01 | 0.00 |
| Verrucomicrobia        | f_Verrucomicrobiaceae_KC189674        | 0.01 | 0.01 | 0.00 |
| Verrucomicrobia        | f_Verrucomicrobiaceae_novel OTU764    | 0.01 | 0.01 | 0.00 |
| Actinobacteria         | f_Kineosporiaceae_HM036657            | 0.00 | 0.02 | 0.00 |
| Actinobacteria         | f_Microbacteriaceae_FJ542898          | 0.00 | 0.02 | 0.00 |
| Actinobacteria         | f_Microbacteriaceae_HF562460          | 0.00 | 0.02 | 0.00 |
| Actinobacteria         | o_Micrococcales_EU009865              | 0.00 | 0.02 | 0.00 |
| Actinobacteria         | Paraeggerthella                       | 0.00 | 0.02 | 0.00 |
| Armatimonadetes        | p_Armatimonadetes_novel OTU351        | 0.00 | 0.02 | 0.00 |
| Armatimonadetes        | p_Armatimonadetes_novel OTU498        | 0.00 | 0.02 | 0.00 |
| Bacteroidetes          | f_Chitinophagaceae_KJ783211           | 0.00 | 0.02 | 0.00 |
| Bacteroidetes          | f_Draconibacteriaceae_AY133094        | 0.00 | 0.02 | 0.00 |
| Bacteroidetes          | f_Saprospiraceae_KC551756             | 0.00 | 0.02 | 0.00 |
| Candidate division SR1 | p_Candidate division SR1_novel OTU627 | 0.00 | 0.02 | 0.00 |
| Candidate division WS6 | p_Candidate division WS6_FJ710710     | 0.00 | 0.02 | 0.00 |
| Chloroflexi            | f_Caldilineaceae_HQ014651             | 0.00 | 0.02 | 0.00 |
| Cyanobacteria          | c_ML635J-21_HJ352604                  | 0.00 | 0.02 | 0.00 |
| Euryarchaeota          | Methanoseta                           | 0.00 | 0.02 | 0.00 |
| Firmicutes             | Anaerococcus                          | 0.00 | 0.02 | 0.00 |
| Firmicutes             | f_Lachnospiraceae_JQ085718            | 0.00 | 0.02 | 0.00 |
| Gracilibacteria        | p_Gracilibacteria_novel OTU622        | 0.00 | 0.02 | 0.00 |
| Unassigned             | Unassigned; novel OTU205              | 0.00 | 0.02 | 0.00 |
| Unassigned             | Unassigned; novel OTU605              | 0.00 | 0.02 | 0.00 |
| Unassigned             | Unassigned; novel OTU606              | 0.00 | 0.02 | 0.00 |
| Unassigned             | Unassigned; novel OTU704              | 0.00 | 0.02 | 0.00 |
| Unassigned             | Unassigned; novel OTU762              | 0.00 | 0.02 | 0.00 |
| Lentisphaerae          | c_PBS-III-20_KM410683                 | 0.00 | 0.02 | 0.00 |
| Proteobacteria         | Bauldia                               | 0.00 | 0.02 | 0.00 |
| Proteobacteria         | Candidatus Accumulimonas              | 0.00 | 0.02 | 0.00 |
| Proteobacteria         | CPB_CS1                               | 0.00 | 0.02 | 0.00 |
| Proteobacteria         | f_A0839_HQ433565                      | 0.00 | 0.02 | 0.00 |
| Proteobacteria         | f_Alcaligenaceae_EF205485             | 0.00 | 0.02 | 0.00 |
| Proteobacteria         | f_Beijerinckiaceae_AB690775           | 0.00 | 0.02 | 0.00 |
| Proteobacteria         | f_Comamonadaceae_AB672263             | 0.00 | 0.02 | 0.00 |

|                  |                                     |      |      |      |
|------------------|-------------------------------------|------|------|------|
| Proteobacteria   | f__Comamonadaceae_AR381565          | 0.00 | 0.02 | 0.00 |
| Proteobacteria   | f__Enterobacteriaceae_KM502221      | 0.00 | 0.02 | 0.00 |
| Proteobacteria   | f__Hyphomicrobiaceae_FJ375431       | 0.00 | 0.02 | 0.00 |
| Proteobacteria   | f__Methylocystaceae_AB930786        | 0.00 | 0.02 | 0.00 |
| Proteobacteria   | f__mle1-27_novel OTU403             | 0.00 | 0.02 | 0.00 |
| Proteobacteria   | f__Neisseriaceae_GU199448           | 0.00 | 0.02 | 0.00 |
| Proteobacteria   | f__Rhizobiaceae_HQ728398            | 0.00 | 0.02 | 0.00 |
| Proteobacteria   | f__Rhodobacteraceae_KC683279        | 0.00 | 0.02 | 0.00 |
| Proteobacteria   | f__Rhodobacteraceae_novel OTU101    | 0.00 | 0.02 | 0.00 |
| Proteobacteria   | f__Rhodocyclaceae_JN391964          | 0.00 | 0.02 | 0.00 |
| Proteobacteria   | f__Rhodospirillaceae_novel OTU537   | 0.00 | 0.02 | 0.00 |
| Proteobacteria   | f__Xanthomonadaceae_EF540404        | 0.00 | 0.02 | 0.00 |
| Proteobacteria   | Falsirhodobacter                    | 0.00 | 0.02 | 0.00 |
| Proteobacteria   | Methylophilus                       | 0.00 | 0.02 | 0.00 |
| Proteobacteria   | mle1-27                             | 0.00 | 0.02 | 0.00 |
| Proteobacteria   | o__DB1-14_KF963646                  | 0.00 | 0.02 | 0.00 |
| Proteobacteria   | o__DB1-14_LK392860                  | 0.00 | 0.02 | 0.00 |
| Proteobacteria   | o__DB1-14_novel OTU117              | 0.00 | 0.02 | 0.00 |
| Proteobacteria   | o__Oligoflexales_EU556982           | 0.00 | 0.02 | 0.00 |
| Proteobacteria   | o__Oligoflexales_GU444087           | 0.00 | 0.02 | 0.00 |
| Proteobacteria   | o__Oligoflexales_novel OTU188       | 0.00 | 0.02 | 0.00 |
| Proteobacteria   | o__Oligoflexales_novel OTU29        | 0.00 | 0.02 | 0.00 |
| Proteobacteria   | o__Oligoflexales_novel OTU592       | 0.00 | 0.02 | 0.00 |
| Proteobacteria   | o__Rhizobiales_novel OTU296         | 0.00 | 0.02 | 0.00 |
| Proteobacteria   | o__Rickettsiales_novel OTU349       | 0.00 | 0.02 | 0.00 |
| Proteobacteria   | Ramlibacter                         | 0.00 | 0.02 | 0.00 |
| Proteobacteria   | Stella                              | 0.00 | 0.02 | 0.00 |
| Proteobacteria   | Tolumonas                           | 0.00 | 0.02 | 0.00 |
| Saccharibacteria | p__Saccharibacteria_JF139710        | 0.00 | 0.02 | 0.00 |
| Saccharibacteria | p__Saccharibacteria_KJ783132        | 0.00 | 0.02 | 0.00 |
| Saccharibacteria | p__Saccharibacteria_novel OTU489    | 0.00 | 0.02 | 0.00 |
| SAR              | Conthreep                           | 0.00 | 0.02 | 0.00 |
| Verrucomicrobia  | f__01D2Z36_JN437836                 | 0.00 | 0.02 | 0.00 |
| Verrucomicrobia  | f__Verrucomicrobiaceae_HM186036     | 0.00 | 0.02 | 0.00 |
| Verrucomicrobia  | f__Verrucomicrobiaceae_novel OTU841 | 0.00 | 0.02 | 0.00 |
| Cyanobacteria    | c__ML635J-21_AB354619               | 0.00 | 0.00 | 0.01 |
| Gracilibacteria  | p__Gracilibacteria_JQ624257         | 0.00 | 0.00 | 0.01 |
| Unassigned       | Unassigned; novel OTU563            | 0.00 | 0.00 | 0.01 |
| Unassigned       | Unassigned; novel OTU790            | 0.00 | 0.00 | 0.01 |
| Proteobacteria   | Aquicella                           | 0.00 | 0.00 | 0.01 |
| Proteobacteria   | f__Rhodocyclaceae_KF956466          | 0.00 | 0.00 | 0.01 |
| Proteobacteria   | Thalassospira                       | 0.00 | 0.00 | 0.01 |
| Proteobacteria   | Uliginosibacterium                  | 0.00 | 0.00 | 0.01 |
| Proteobacteria   | Undibacterium                       | 0.00 | 0.00 | 0.01 |
| Firmicutes       | Saccharofermentans                  | 0.01 | 0.00 | 0.00 |
| Unassigned       | Unassigned; novel OTU724            | 0.01 | 0.00 | 0.00 |
| Saccharibacteria | p__Saccharibacteria_novel OTU390    | 0.01 | 0.00 | 0.00 |
| Bacteroidetes    | Terrimonas                          | 0.00 | 0.01 | 0.00 |
| Unassigned       | Unassigned; novel OTU576            | 0.00 | 0.01 | 0.00 |
| Proteobacteria   | Bacteriovorax                       | 0.00 | 0.01 | 0.00 |
| Proteobacteria   | f__Comamonadaceae_JN656871          | 0.00 | 0.01 | 0.00 |
| Saccharibacteria | p__Saccharibacteria_novel OTU964    | 0.00 | 0.01 | 0.00 |

61

62

63 **Literature cited**

64

65 Xu W, Krishnakumar S, Miranda M, Jensen MA, Fukushima M, Palm C, Fung E,  
66 Davis RW, St Onge RP, Hyman RW. Targeted and highly multiplexed detection of  
67 microorganisms by employing an ensemble of molecular probes. *Appl Environ*  
68 *Microbiol.* 2014 Jul;80(14):4153-61. doi: 10.1128/AEM.00666-14. Epub 2014 May  
69 2. PMID: 24795371.

70 Benjamini Y, Hochberg Y. Controlling the false discovery rate: a practical and  
71 powerful approach to multiple testing. *Journal of the Royal Statistical Society.*  
72 1995. Series B 57, 289–300.

73 McDonald D, Price MN, Goodrich J, Nawrocki EP, DeSantis TZ, Probst A,  
74 Andersen GL, Knight R, Hugenholtz P. 2012. An improved Greengenes  
75 taxonomy with explicit ranks for ecological and evolutionary analyses of bacteria  
76 and archaea. *ISME J* 6:610–618.

77
